# Supplementary material
Source: publisher site journal article supplement (https://www.dovepress.com/article/supplementary_file/564356/564356%20Revised%20Supplementary%20Tables.xlsx)
Supplement: Supplementary file 1 [file 564356%20Revised%20Supplementary%20Tables.xlsx]

## Sheet: Supplementary Table 1.  Targets
Table S1. Targets of EGCG
CASP3
RYR1
KDR
HOXD1
LDLR
IL18
CEBPA
CCL17
PRKCA
MAPK14
PDGFB
JUND
FBXO32
PCNA
MMP7
CTNNB1
NFKB1
FOSB
IGF1
PIK3CA
DNMT3B
AKR1B1
ME1
PIK3CD
TLR4
DNMT1
CDK6
CYP7A1
SOD1
PPARG
HSPA5
CASP9
CAV1
VEGFA
TRIM63
ODC1
BAD
EPHA2
MADD
GSK3B
VCAM1
EGR1
CXCL3
JUN
PRKCE
TIMP1
IGF1R
NCF1
AMH
BCL2
CASP1
BDNF
CYP3A7
ELK1
ESR2
EGFR
FAS
IRS1
CAT
HIF1A
IFI27
CDH2
ESR1
CDK2
PIK3CG
NOS2
MAPK8
TRAF6
CD4
DNMT3A
MTOR
NLRP3
RAF1
ERBB2
MYH9
IRF3
MIR221
IL1B
MPO
APP
MUC5AC
CCND1
MDM2
CCNA2
CDH1
CCL22
CASP8
IFNG
AKT1
BTG2
TEP1
VIM
IL10
FGFR1
CXCL10
FYN
FLT1
STAT1
MAPK1
MMP9
PECAM1
FOXO3
PTEN
JUNB
BAX
CXCL12
CREB1
MAP3K7
STAT3
SP1
TNF
TGFB1
VEGFC
FGF2
NR1H4
PIK3R1
FOS
PIK3CB
MAPK3
IL6
DDX5
AHR
DDIT3
NFE2L2
SEC14L2
NR1I2
ALOX5
PRKCB
PLCG1
SRD5A2
OXSM
RPSA
MMP2
ACACA
AHSA1
AGT
BAK1
BBC3
BCL2L1
BCL2L10
BCL2L2
PDGFRB
IQCG
LRTOMT
CDK1
CDK4
TP53
MMP13
CDKN1A
CDKN1C
Cdkn2a
DHFR2
TOP1
MAP2K1
EDN1
EDNRA
EEF1E1
EIF6
FASN
FGF10
FOXO1
FOSL1
FOSL2
ARHGAP35
G6PD
GDPD5
FCER1A
HTT
IKBKB
IL6ST
MMP1
IVL
MMP14
TIMP2
MAPK7
MAP3K1
POR
ELANE
NFKBIA
EGF
HERC5
PTGS2
RUNX1T1
RASGRF2
RB1
RPS6KA1
RPS6KB1
PIM2
TBK1
SAA4
SREBF2
MMP3
RELA
TDP1
PLAU
XDH
MAPT
DYRK1A
ITM2B
TERT
ITGAV
PGD
MET
ABCB1
BACE1
SQLE
KCNH2
ST3GAL3
FUT7
FUT4
GABRA4
CA3
MMP12
CA2
CA1
CA12
CA7
CA6
CA9
CA5B
CA5A
PTGS1
ADAM9
ABCG2
CA4
KLK1
SPINT2
ABCC1
DNM1
TAS2R31
PGF
CA13
THRB
CHEK1
MAP3K10
CTSV
CES1
PPIA
HCK
CTSD
TTR
KIF11
METAP1
CFB
AR
BCHE
PGR
TREM1
EPHB4
CYP19A1
TGFBR2
F2
PIM1
NPR3
FAP
FKBP1A
PDE4B
GBA
GSTP1
DDX6
MAPKAPK2
CASP7
ANG
NUDT9
NR1H2
AURKA
ICAM2
PNP
AMY1B
HSD17B1
CTSS
MTAP
GSR
ESRRG
IMPA2
SRC
NQO1
BRAF
ALB
AKR1C3
PLK1
HSPA8
PDE4D
HSD17B11
CCL24
NQO2
ADAM17
RTN4R
MAOB
SHBG
DAPK1
AMY2A
HSD11B1
PLA2G10
LSS
SORD
SULT2A1
GC
BMP7
NOS3
FABP4
METAP2
LCN2
CFD
CTSB
NR3C2
LCK
DUSP6
F10
TYMP
FNTA
C1R
PAH
PKIA
LTA4H
ANXA5
TYMS
CBR1
CSNK1G2
RORA
MIF
BCAT2
HSP90AA1
TGFBR1
PDE9A
PNPO
AKR1C1
DPP4
AZGP1
CHIT1
AMD1
IGLV2-8
CTSK
RXRA
REN
TNNC1
SYK
HPGDS
PYGL
CRAT
PPP5C
SOD2
PDPK1
LGALS7B
MMP8
DHODH
PPARD
ISG20
AHCY
CDA
NMNAT2
DCK
ADH1B
ARF1
ATOX1
PCK1
PDE3B
YARS1
CALM3
BAG1
HDAC8
SHMT1
NR1H3
RAC2
TNK2
NMNAT1
RHOA
RHEB
CYP2C9
ITK
HADH
ADK
ZAP70
KYAT1
GSTA1
MTHFD1
BST1
ABO
PTPN1
HK1
PDK2
JAK3
HEXB
ADH1C
PLA2G2A
IMPDH2
PARP1
CTNNA1
F7
PAK5
PTPN11
FGFR2
FHIT
CCNT1
RNASEL
ALDH2
SERPINA1
WAS
RAB5A
LGALS2
HMGCR
NR1I3
REG1A
FABP5
CSNK2A1
TPI1
LYZ
ADH5
SETD7
TTPA
FABP6
THRA
ARHGAP1
OTC
ST14
UCK2
SULT2B1
NCS1
PDHB
PPARA
MAN1B1
HPN
PAPSS1
FABP7
GNPDA2
EPHX2
PLAT
AKR1C2
TGM3
DTYMK
TEK
GSTT2B
FECH
SULT1E1
APCS
HSP90AB1
LGALS3
CCL5
PRKCQ
SRR
GALE
RARG
CLK1
APRT
NR3C1
PADI4
ABL1
RBP4
INSR
CRABP2
CSK
FABP3
CTSF
ACPP
ERBB4
GP1BA
SELP
B3GAT3
ARSA
HAGH
TPH1
RNASE3
JAK2
XIAP
ALDOA
BLVRB
KIT
PAK6
CDK5R1
ACADM
CD1A
CBS
UMPS
AGXT
BIRC7
RAB11A
IL2
GPI
CTSG
C1S
NR2C2
AKT2
GALK1
PPCDC
GCDH
MMEL1
TK1
CDC42

## Sheet: S2-Supplementary Table 2.  Targ
Table S2. Targets of OA
GDF5
WWP2
SBNO1
LTBP1
TNF
LEP
WNT5A
WNT3A
WNT3
WNT1
WNT6
WNT2
WNT7A
WNT4
IL6
COMP
CRP
IL1B
ADIPOQ
TGFB1
IL1RN
RETN
FGF18
MMP13
MIR219A1
ASPN
NFKB1
CCL2
VEGFA
IL1A
SMAD3
ACAN
COL2A1
MATN3
FRZB
H19
LOC130057352
GAS5
HOTAIR
UFC1
COL11A2
MEG3
PACERR
KCNK15-AS1
TMSB4X
CCAL1
LOXL3
COL9A1
PCGEM1
PTGS2
KCNJ5
KCTD13
PMS2P2
TGFBR1
TGFBR2
COL9A2
IDUA
TGFB2
NPPC
COL9A3
DLX3
MMP3
ADAMTS5
TNFRSF11B
POLR1A
TRAIP
SULF1
GDF6
MMP1
ADAMTS17
TMEM38B
TAPT1
NPR3
SLCO2A1
ATRIP
SC5D
TUBGCP6
LRRK1
IFT57
PKDCC
CEP97
DIP2C
DMRT2
DONSON
SUCO
SLCO5A1
OS6
COL11A1
IGF1
SMAD2
ADAMTS4
TGFB3
SLC26A2
FBN1
IL17A
COL1A1
CXCL8
CILP
MIR140
MMP9
COL3A1
BGLAP
TNFSF11
TIMP1
TRPV4
SOX9
PRG4
BMP5
TRAPPC2
COL10A1
IL10
MMP2
RUNX2
IL1R1
PTGS1
NOS2
DDR2
MATN1
LRCH1
MGP
BMP2
UFSP2
BMP7
CHI3L1
SMAD4
DCN
AEBP1
HAPLN1
MCF2L
HTRA1
ADAM10
TNFAIP6
LOC109461476
WDR35-DT
COL5A2
CTSK
CCN2
ADAMTS14
ESR1
ANKH
SOD2-OT1
CLEC3B
MIR146A
HFE
SPP1
PRKG1
COL5A1
CFAP96
UCMA
KIF22
ACTA2
HLA-DRB1
MIR199A1
CD36
FGFR3
IHH
VDR
PTPN22
TLR4
FBN2
EFEMP2
SMAD6
LRP5
FOXE3
LTBP3
FLNA
IL18
LINC02605
GHR
LOX
SHOX
BMP6
BMP4
IL2RA
CLCN7
IGF2
ELN
PVT1
CERNA3
OFD1
MYLK
IL4
PTHLH
CANT1
ADAM12
MIR155
HLA-B
HMGB1
VCAN
MALAT1
B3GALT6
SLC2A10
ACP5
IFNG
MYH11
MFAP5
COL1A2
XYLT1
TNFRSF1A
FGF2
TIMP2
CD44
FMOD
LTBP2
IL1RAPL2
PPARG
GZF1
RELA
ENG
IL13
IBSP
CENPP
STAT4
BDNF-AS
SIRT1
IGF1R
SOST
CXCL12
FTO
NLRP3
MEFV
TP53
NAMPT
ALB
HIF1A
CCL5
FN1
CD247
DKK1
IL15
GHRHR
MAPK1
MIR98
P3H2
ENPP1
ACE
CCL3
CSGALNACT1
TLR2
COG5
DDRGK1
COL18A1
SOX5
NPR2
IGFALS
PLAU
CASR
CHST3
MAP2K1
BDNF
NF1
NGF
MYH3
ICAM1
MMP8
SERPINE1
MIR373
TNXB
CCN6
FAS
IL2
PAPSS2
ZFAS1
SNORD15A
AKR1C1
GNL3
LAMA5
HNF1A-AS1
PTH1R
GPC3
MIR34A
GH1
IL2RB
ADAMTS3
IL17F
CTSB
TRPV1
IRF5
PADI4
PRICKLE1
PIGW
KIF27
COL4A2-AS2
SCARNA23
LOC101928438
MIR150
TNFRSF1B
JUN
CALCA
MIR132
SERPINA1
HGF
SOD2
CXCR4
STAT5B
VCAM1
PHEX
MIR27A
SOD1
CTNNB1
ESR2
TIMP3
COL6A4P1
KLF3-AS1
ALDH1A2
ADAMTSL1
TTR
IL4R
TNFRSF11A
MAPK8
BTNL2
OSM
MIR211
IGFBP3
COLGALT2
MIR320A
NFKBIA
IL18R1
UFL1
MAT2A
CRH
BTK
FLNB
GHSR
KL
CASP3
TENT5A
LRP1
POMC
OPTC
MIF
OPRM1
MIR26A1
RELN
CCR5
HMOX1
AKT1
HLA-DQB1
POU1F1
CXCL1
HSPA5
PTGES
NOTCH1
CAT
HRAS
NRAS
PPP1CB
BCL2
LRP6
DDH2
TGFA
TNFAIP3
CCL15-CCL14
DOT1L
CALM1
IL7
OTULIN
BRAF
PTPN11
PTPN2
CCN4
CASP1
PLA2G4A
AGER
MIR335
MIR125A
PTH
ATP7B
MIR199B
MAPK14
LOC100130744
F2RL1
HSPG2
THBS1
SYK
PSMC3
TRIM33
BGN
NEAT1
UQCC1
NFE2L2
MIR145
MAP2K2
TNC
S100A8
SAA1
COL27A1
TGM2
ALOX5
MIR33B
COX5A
HGD
IL11
ADAM17
CSF1
SP1
DIO2
VIP
SUPT3H
LEPR
CCR3
CBS
ELANE
TP63
S100A9
RHOB
TUG1
HBP1
TLR9
RAF1
KRAS
CBL
SOS1
GLI2
OTX2
RIT1
MRAS
SOS2
LHX3
LZTR1
SOX3
RRAS
SPRED1
BPNT2
PROKR2
SHOC2
CUL7
LHX4
SRCAP
PROP1
EVC
HESX1
OBSL1
CCDC8
LOC130058566
LOC130061867
ANKRD55
PIEZO1
MIR223
F2
NME8
FASLG
IL16
MTHFR
MIR9-1
POSTN
FOS
MIR93
S100A12
MIR29B1
MMP14
MIR221
SLC22A4
MIR671
ACVRL1
P4HB
TLR1
TYR
GPR143
FRMD7
SUPT20H
SLC38A8
CCR6
EGF
MTOR
AP3D1
STAT3
CCL4
TLR8
COMT
FGF23
CD14
ADAMTS9
CCL18
EPAS1
IL23A
CX3CL1
BMPR1A
GSR
WNT9A
LIF
IL22
MIR27B
SOX6
ITGAM
FSTL1
TLR3
PTPRC
MIR146B
FGFR1
MPO
PLAUR
SYVN1
GLT8D1
CTSS
MIR22HG
GDF5-AS1
MIR381
CIITA
CD244
NFKBIL1
MIR29A
MMP7
MIR103A1
SPG7
SIRT6
SNHG7
CDC5L
TLR8-AS1
MIR18A
IL6R
SNHG16
IGFBP5
HP
B4GALT7
MIR149
GNAS
GLIS3
BAX
B2M
NOX4
IL5
LUM
MIR101-1
HULC
TRAPPC1
SERPINA3
HPGD
B3GAT3
GALNS
CCL20
CCR2
MIR139
F9
IL17RA
SOCS1
XIST
APOA1
CA2
MCAM
MIR199A2
CHST14
ITGB1
GNPTAB
FGF1
FKBP14
PLOD1
PBRM1
NCOR2
CD68
IL34
PIK3R1
CRTAC1
NLRP1
CCR1
TRAF6
LRP2
ALPL
TRE-TTC3-1
CYP1A1
LTA
MC1R
CTSD
PON1
PITX1
MIR26A2
HSPD1
ITLN1
FOXP3
TRIP4
SP7
GPR22
VIM
NCOA3
FOSL1
PLEC
BSG
IL37
LPAR1
IL1RL2
MIR127
GAPDH
CX3CR1
MIR210
CSF2
ADAMTS2
PGR-AS1
TRIP11
LEPQTL1
FGFR2
TRPV6
DSPP
GJA1
PTN
FKBP5
MIR214
TGFBR3
DMP1
DPP4
MIR26B
SNORD19
LMX1B
PLA2G2A
MIR103A2
MEPE
MIR130A
MIR195
IGFBP7
CDKN1A
GPX3
CHUK
CLU
STT3B
FAS-AS1
CXCL10
NFIX
LINC01411
CCND1
PTEN
CCR7
FOXO3
ADAMTS1
PEPD
TMEM129
PRDM5
ANPEP
EZH2
MIR22
TH
PECAM1
ALPP
ATF6
FBLN5
FBLN1
DUS4L
DNMT3A
MIR1227
ENO1
ERG
CXCR3
HAS1
LEF1
BDKRB2
IL21
CHRD
GPT
CPT2
ABCA3
TYRP1
NHERF1
OCA2
NR2E3
CHRNG
PAX1
SLC45A2
COG4
GDF3
IPO8
MEOX1
SLC24A5
MYO18B
LRMDA
SNHG29
SNHG28
UCA1
FBXL19-AS1
AP4B1-AS1
LURAP1L-AS1
LRP1-AS
LOC129930561
PWAR1
MIR16-1
CHADL
SNHG1
CP
VIM2P
OXT
ANXA1
ITGB3
CCL11
NOD2
CXCL13
MIR320C1
MIR9-2
MIR9-3
TFAP2A
TLR10
MIR186
IL33
SCN9A
MYC
NOG
BMAL1
MIR101-2
GBA1
CREB1
SLC39A8
TWIST1
CASP8
DANCR
SLC39A13
ZNF469
TRAF1
IL32
MIR23A
NPC1
KLF4
JAG1
MIR138-1
MIR138-2
PARP1
IRAK3
MIR181A1
IL1RAP
PLOD2
GREM1
IFNB1
MIR29C
HAS2
HDAC4
RBFOX1
CILP2
SNHG14
MIR224
YAP1
FGF7
MIR663A
MIR142
CD40
ZEB1
SREBF2
MIR126
MYD88
MIRLET7E
MMP17
MIR4435-2
IKBKE
MIR423
GLB1
LY96
RXRB
MIR455
PARD3B
CAV1
LGALS3
WNT16
CDH2
CSF1R
PDIA4
TBX4
LPCAT3
EFEMP1
HHIP
CTSL
FOXO1
MIR204
MIR33A
MIR15A
MIR337
CD163
RPL26
UBA5
UFM1
CDK5RAP3
UFSP1
CC2D2B
ACTMAP
MKRN2OS
HSP90B1
AQP1
SMURF2
RARRES2
GRN
HRH2
THY1
GPI
DNMT1
ACSL4
MIR885
CEMIP
MIAT
TRAPPC4
TRAPPC9
TRAPPC6B
TRAPPC10
TRAPPC11
TRAPPC12
TRAPPC3
TRAPPC6A
TRAPPC8
TRAPPC5
NT5E
MIR21
MIR148A
DEAF1
SPHK1
ATF2
PSAP
P3H1
CANX
INS
SST
PLAT
HAVCR2
IL1R2
MAZ
MIR4284
GLA
TAGLN
HOTAIRM1
ASTN2
CMKLR1
FGF3
ITGB2
TIMP4
NR3C1
TFRC
LRRK2
MIR17
MIR451A
EDN1
ANP32A
SLPI
NPY
GZMA
TFEB
TSPO
SLC34A3
NGFR
XBP1
PIK3CG
IL22RA1
SPARC
PLEKHM1
SCARB2
ATG7
SPCS1
NACA2
RWDD2B
DLX5
AXL
LRRC15
MIR497
MIR376B
TPI1
IL10RA
CXCR5
PRL
MIR29B2
PROCR
XYLT2
EDC3
TRAPPC13
INHBA
MMP28
LGALS1
OLR1
IL24
MIR193B
SDC4
MIR543
CEACAM16
AR
KLF5
METTL3
MIR196A2
MIR375
MIR488
ITGB5
SELL
DIO3
KNG1
MYH14
JAM3
SMPD1
HDAC9
MAP1LC3A
MIR1275
MET
ALOX15
CYP19A1
PTGER4
MIR206
MIR675
MIR500B
THRA
USP33
STAT1
APOE
NUCB2
FGF5
MELTF-AS1
CXCL11
MMP16
FGF10
FOLR2
CCN3
HABP2
SLC17A5
P4HA1
SNORD13
SERPINH1
CST3
DDHD1
UCN
MIR16-2
MMP12
RAC1
P4HA2
LOC654780
GRHL3
TRPS1
MIR425
MIR20B
MIRLET7F1
MIR125B1
MIR125B2
MIR30A
CAST
TACR1
ADAMTS7
ITGAV
CXCL9
XDH
DUSP1
SDC1
P3H2-AS1
CYP27B1
ALCAM
COL4A5
MSTN
GNAS-AS1
MIR122
MIR222
FTH1
PLOD3
CRTAP
JUND
MIR106A
MIR1277
LMNA
STT3A
YWHAE
PRDX3
S100B
MIR338
SFRP4
ADA
CCR4
SMAD9
EMILIN1
SNHG5
PRKAR2B
BCAP29
SFRP1
IL1RL1
IFRD1
EIF4G2
TRL-TAG1-1
MIR320C2
MAP2K7
ISOC1
SHBG
FGF9
HYAL1
HLA-A
SOX2
COL6A3
CHST11
LGR4
MRC1
DSTN
SEC24A
NLRC5
MIR10B
NOS3
MIR502
TCF4
OPRD1
THBS3
GOLGB1
MIR3922
CTSG
CXCR1
TCIRG1
MIR365A
PTPRS
PDE6H
PPP3CA
CAMK2B
DVL2
KDM4B
DPEP1
ECM1
XRCC4
CRY1
CYP26B1
CRTC1
MUS81
CSMD1
DNAH10
TNIP2
CCL16
CCL14
MLXIP
CTBP1-DT
TSBP1-AS1
CRYAB
KDM6B
LCN2
CRLF1
IL9
OPRK1
IL18RAP
MKX
MIR30B
MIR328
MIR181A2
MIR24-1
MIR24-2
MIR144
CDR1-AS
MIR181C
C5AR1
GSTM1
MALT1
HDAC1
MIR7-3HG
PRKAA1
PRDX5
VTN
SUMF1
BMPR2
JUNB
CCN1
TNFRSF6B
THSD7B
ZC3H11B
CRELD2
DERL1
DERL2
HDAC2
MIR133B
EXT1
AHR
YY1
APOB
FAP
STC1
OLIG3
SNHG15
MIR129-2
MIR1207
CD34
CDKN2B-AS1
MIR20A
MIR216A
MAOA
CXCR2
MAP2K4
TYK2
BMP3
IRF1
CHI3L2
ADIPOR1
PDPN
SELP
TNFSF13B
BMPR1B
SOX4
MIR31
BRD4
NTN1
HLA-DQA1
ADCYAP1
TREH
DKK3
AKNA
XCL2
MIR200B
PART1
MIR137
MIR1246
SERPINC1
GHRL
SAA4
ONECUT2
IDS
NPC2
COL5A3
ADAMTSL4
POLG
TRIB3
APLN
MIR483
GUSB
GSTP1
ADRB2
OCRL
PREP
MIR582
MIR92A1
MYDGF
CALCR
SKI
SLC11A1
SEC23A
GORAB
ADAMTS8
PWAR4
DNMT3B
PTK2B
ESRRB
KCNQ2
NCAM1
ACTG1
NR1D1
TYMP
HDAC7
SERPINB2
CALM2
FOXM1
MFGE8
PGAP1
UNC5B
FFAR4
HLA-DQA2
WTAP
SPON1
FBXO21
MIR141
MIR200A
MIR590
MIR128-1
MIR361
FOXD2-AS1
HIVEP2-DT
MIR4654
MIR1202
FGF8
PSTPIP1
OSTM1
FGF16
TNFSF14
USP50
CFLAR
ANXA5
ROR2
TRC-GCA24-1
MAP2K6
LAMB1
CYBB
MID1
PGF
CCL21
KCNQ1OT1
MIR296
HLA-DPB1
HLA-DMA
FLT1
CD80
RNU4ATAC
MIR92B
NAGLU
PNOC
FCGR2A
MMP10
CLCN5
ITGA5
SEMA3A
HMMR
BIRC5
TCF7L1
LGALS9
MIR130B
IGFBP2
MIR197
MIR485
PDCD5
MIRLET7A1
PLXNC1
COL12A1
DNAH8
MAPT
MEN1
CDC42EP2
EHBP1L1
H3C3
LINC00976
TPSAB1
MIR454
PLEKHA7
POU4F3
PCMTD1
ST18
PRSS56
ANGPT2
MAF
IL3
ADIPOR2
HMGB2
CCL8
CLEC4A
CYTL1
CYTOR
MCM3AP-AS1
MIR634
LOC126862586
SEC23B
DYM
UGDH
PTX3
ADAM8
TRAPPC2B
MIR30C1
PRELP
CHAD
MIRLET7A3
MIR377
MIRLET7A2
MIR124-1
ANGPTL2
SQSTM1
VWF
IKBKB
MYOSLID
TENM3-AS1
GSK3B
CD38
CNR1
IL7R
LOXL2
HBEGF
SERPINB5
SOD3
SP3
SERPINE2
KLF2
PCSK6
CD40LG
BBC3
MIR99A
NTRK1
PAK1
TRA-TGC7-1
CYCS
TNFSF12
MIR217
MIRLET7F2
NOS1
BAG6
CHRDL2
COL20A1
TNFRSF10A
MIA3
SELE
COL4A1
C1R
CFI
F3
CSF3
AZU1
CXCL5
SERPINA5
NLRP12
HRH4
RPA3
IL36A
LOC111365141
CACNA1G
ATF3
LINC00665
LNCRNA-ATB
MIR6786
DSP
CCL22
CIRBP
ACVR1
CD4
FGF17
CD86
EYA1
FGF4
MCOLN1
GNRH1
FGF6
FGF20
SNX10
ARHGAP29
FGF22
PALM
PALMD
AGTR1
ERAP2
SOCS3
SCN5A
OIP5-AS1
LIPA
CCDC134
TBX22
ALOX5AP
F8
SLC40A1
AIP
ZMPSTE24
GPR101
ZNF687
ITIH1
CEACAM4
C3
PPARGC1A
B4GALT1
DDR1
FBXW7
TRAF2
CD47
HMGA2
TGIF1
AHSG
GAS6
HYAL2
CABIN1
GPD1L
MRC2
LGALS8
IFNL1
FNDC5
METRNL
SLTM
MIR374A
HCG18
TRD-GTC9-1
KDELR2
GC
OGN
HMGCR
KCNJ11
MUTYH
ORAI1
GLRX
UTS2
EPYC
KLF9
MIR4435-2HG
COL6A4P2
ASAH1
PRKN
PARK7
SGSH
CFL2
LAMP1
LAMP2
IGFBP1
HPX
AIM2
CNR2
MIR346
SILC1
TIA1
TXN
SLC26A4
NIN
KIF21A
RAB33B
SLC35D1
DNAI2
PACSIN3
ROGDI
SAA2
KIF21B
ELOF1
TRAPPC3L
OLAH
KCNMA1
H1-4
ERBB2
PLA2G6
POR
PTGER2
ADM
NRCAM
SIK3
NCALD
LRG1
MIR4516
CXCL16
HSPB1
ALK
CDKN2A
PKM
ETS1
KEAP1
MAP3K5
CYBA
GPX4
ITCH
MECP2
ESRRA
PTGES3
TRAF3
RIPK2
SHC1
FABP4
PPBP
STING1
SERPINA4
TFF3
DUSP5
FZD8
PITRM1
IL15RA
CCL13
IL27
MIR185
PCAT1
MIR92A2
MIR577
ERVK-18
BLK
MAFB
CCRL2
F5
ITGA4
TLR5
CAPN2
AKR1C2
TMED2
DHDH
OTC
PLS3
ZFP36
PGR
ERV3-1
CAMK2A
CSTA
CXADR
IL12A
HOXA1
SOX8
TGIF2
FOXD1
C1QTNF9B
MIR486-1
MIR4326
RPE65
GFM1
FBLN2
FRMPD1
EEIG1
HTR2A
SMAD7
ARSA
SAR1A
TRAPPC2L
SNRNP48
CENATAC
RNU12-2P
SPDT
HSD11B1
CARD16
GALNT15
TPR
MMP19
CXCR6
GAA
DRD2
PCCB
GLO1
TRIOBP
RP1L1
C3orf70
EHHADH-AS1
BPI
CCL19
LVRN
C1S
F2RL3
GALE
SMURF1
HIF3A
KLRB1
FIP1L1
METTL14
CGAS
DPT
DCSTAMP
NUPR1
ZNF440
HOTTIP
MIR129-1
MIR105-1
MIR498
PRNCR1
MIR665
MSH6
ADAM15
KIT
PIK3CA
PRKCA
TLR7
LONP1
NR1H3
RAD54L
TXNRD1
FGF21
SCG2
SLC23A2
NMUR1
TET1
PGAM5
PIEZO2
GSTT1
MIRLET7C
NKILA
TRU-TCA1-1
TAC1
E2F1
L3MBTL2
piR-46032
TGDS
MIR320E
CRMA
PLA2G3
LTF
IL18BP
CTLA4
HSPA4
KERA
PYCARD
DKK2
CYP2C9
AGTR2
CCK
TREM1
MC5R
ADAMTS15
EGFR
HDAC3
MFN2
PTK2
STK4
CSPG4
HK2
CS
KPNA2
MST1
SFTPA1
CSF2RA
ICOS
SFTPD
ULK1
PTH2R
SFTPB
DNTT
BNIP3
SDCBP
SFTPC
SNIP1
SPRED2
CBX4
MAP3K9
CREB5
SLC25A27
MFAP4
IL1F10
ALKBH5
SYNE3
TRIM14
C1QTNF12
FER1L4
MIR212
MIR23B
MIR449A
DGCR5
LINC00313
MIR193A
MIR9-2HG
MIR19B1
MIR31HG
MIR505
MIR940
MIR300
LINC00707
MIR4487
MIR4498
LSP1P3
LOC106728418
OAP
ROCR
CEBPB
SATB2
RRM2B
BMP1
FKBP10
GGCX
FURIN
OS4
5-LOX
MMP-2
TrkA
COX-1
FXR
MAPK12
COX-2
COX
IKKB
PSEN1
BDKRB1
PSEN2
GS
ANGPTL3
MMP-3
PAR2
BACE
CCL17
p38
MMP
Wnt pathway

## Sheet: Supplementary Table 3-PPI Netwo
Table S3. PPI Network Relationships
#node1	node2	node1_string_id	node2_string_id	neighborhood_on_chromosome	gene_fusion	phylogenetic_cooccurrence	homology	coexpression	experimentally_determined_interaction	database_annotated	automated_textmining	combined_score
ADAM17	TNF	9606.ENSP00000309968	9606.ENSP00000398698	0	0	0	0	0.044	0	0.75	0.811	0.95
AHR	ESR1	9606.ENSP00000242057	9606.ENSP00000405330	0	0	0	0	0.059	0.833	0	0.45	0.906
AKR1C1	AKR1C2	9606.ENSP00000370254	9606.ENSP00000370129	0	0	0.047	0.986	0.829	0.835	0.9	0.442	0.998
AKT1	MAPK1	9606.ENSP00000451828	9606.ENSP00000215832	0	0	0	0.593	0.118	0.11	0.9	0.872	0.988
AKT1	CCND1	9606.ENSP00000451828	9606.ENSP00000227507	0	0	0	0	0.088	0	0	0.919	0.923
AKT1	MAPK14	9606.ENSP00000451828	9606.ENSP00000229795	0	0	0.119	0.621	0.246	0.739	0.9	0.535	0.99
AKT1	PIK3CA	9606.ENSP00000451828	9606.ENSP00000263967	0	0	0	0	0.06	0.738	0.9	0.951	0.998
AKT1	FGF2	9606.ENSP00000451828	9606.ENSP00000264498	0	0	0	0	0	0	0.5	0.859	0.926
AKT1	STAT3	9606.ENSP00000451828	9606.ENSP00000264657	0	0	0	0	0.118	0.096	0.5	0.925	0.966
AKT1	EGF	9606.ENSP00000451828	9606.ENSP00000265171	0	0	0	0	0	0	0	0.933	0.933
AKT1	TP53	9606.ENSP00000451828	9606.ENSP00000269305	0	0	0	0	0.049	0.184	0.9	0.934	0.994
AKT1	NOS3	9606.ENSP00000451828	9606.ENSP00000297494	0	0	0	0	0	0.786	0.9	0.909	0.997
AKT1	CASP3	9606.ENSP00000451828	9606.ENSP00000311032	0	0	0	0	0.044	0.311	0	0.923	0.945
AKT1	HSPA5	9606.ENSP00000451828	9606.ENSP00000324173	0	0	0	0	0.042	0.637	0	0.924	0.971
AKT1	GSK3B	9606.ENSP00000451828	9606.ENSP00000324806	0	0	0	0.579	0.138	0.929	0.9	0.428	0.996
AKT1	NOS2	9606.ENSP00000451828	9606.ENSP00000327251	0	0	0	0	0	0.045	0.9	0.775	0.976
AKT1	CAV1	9606.ENSP00000451828	9606.ENSP00000339191	0	0	0	0	0.074	0.046	0.5	0.875	0.937
AKT1	FOXO3	9606.ENSP00000451828	9606.ENSP00000339527	0	0	0	0	0.103	0.853	0.9	0.928	0.998
AKT1	STAT1	9606.ENSP00000451828	9606.ENSP00000354394	0	0	0	0	0.106	0.096	0.4	0.93	0.961
AKT1	MTOR	9606.ENSP00000451828	9606.ENSP00000354558	0	0	0	0	0.06	0.925	0.9	0.954	0.999
AKT1	JUN	9606.ENSP00000451828	9606.ENSP00000360266	0	0	0	0	0.049	0.085	0.9	0.915	0.991
AKT1	PTEN	9606.ENSP00000451828	9606.ENSP00000361021	0	0	0	0	0	0.648	0	0.967	0.988
AKT1	FOXO1	9606.ENSP00000451828	9606.ENSP00000368880	0	0	0	0	0	0.881	0.9	0.94	0.999
AKT1	IGF1	9606.ENSP00000451828	9606.ENSP00000376637	0	0	0	0	0	0.063	0	0.934	0.935
AKT1	NFE2L2	9606.ENSP00000451828	9606.ENSP00000380252	0	0	0	0	0.049	0.317	0.4	0.825	0.923
AKT1	BCL2	9606.ENSP00000451828	9606.ENSP00000381185	0	0	0	0	0	0	0.9	0.934	0.993
AKT1	CDKN1A	9606.ENSP00000451828	9606.ENSP00000384849	0	0	0	0	0	0.776	0.9	0.833	0.995
AKT1	CREB1	9606.ENSP00000451828	9606.ENSP00000387699	0	0	0	0	0.092	0.292	0.75	0.809	0.965
AKT1	TNF	9606.ENSP00000451828	9606.ENSP00000398698	0	0	0	0	0.074	0.057	0	0.903	0.907
AKT1	RAF1	9606.ENSP00000451828	9606.ENSP00000401888	0	0	0.145	0.583	0.075	0.816	0.9	0.557	0.992
AKT1	ESR1	9606.ENSP00000451828	9606.ENSP00000405330	0	0	0	0	0.055	0.314	0	0.877	0.913
AKT1	PIK3CG	9606.ENSP00000451828	9606.ENSP00000419260	0	0	0	0	0	0.098	0.9	0.947	0.994
AKT1	PIK3R1	9606.ENSP00000451828	9606.ENSP00000428056	0	0	0	0	0.058	0.558	0.9	0.913	0.995
AKT1	IKBKB	9606.ENSP00000451828	9606.ENSP00000430684	0	0	0	0.601	0.152	0.775	0.9	0.57	0.99
AKT1	TRAF6	9606.ENSP00000451828	9606.ENSP00000433623	0	0	0	0	0.075	0.644	0	0.873	0.954
AKT1	HIF1A	9606.ENSP00000451828	9606.ENSP00000437955	0	0	0	0	0	0.229	0	0.916	0.932
AKT1	CTNNB1	9606.ENSP00000451828	9606.ENSP00000495360	0	0	0	0	0.074	0.539	0.4	0.93	0.979
ALB	TTR	9606.ENSP00000295897	9606.ENSP00000237014	0	0	0	0	0.432	0.125	0	0.99	0.994
ALB	IL6	9606.ENSP00000295897	9606.ENSP00000385675	0	0	0	0	0	0	0	0.926	0.926
ALB	GC	9606.ENSP00000295897	9606.ENSP00000421725	0	0	0.123	0.653	0.686	0	0	0.936	0.98
ALB	F2	9606.ENSP00000295897	9606.ENSP00000308541	0	0	0	0	0.652	0.052	0	0.973	0.99
ALB	SHBG	9606.ENSP00000295897	9606.ENSP00000369816	0	0	0	0	0.062	0	0	0.996	0.996
ALB	SERPINA1	9606.ENSP00000295897	9606.ENSP00000416066	0	0	0	0	0.263	0.074	0.4	0.996	0.998
ALOX5	CYP2C9	9606.ENSP00000363512	9606.ENSP00000260682	0	0	0	0	0.065	0.065	0.9	0.551	0.955
ALOX5	PTGS1	9606.ENSP00000363512	9606.ENSP00000354612	0	0	0	0	0.13	0	0.9	0.692	0.97
ALOX5	PTGS2	9606.ENSP00000363512	9606.ENSP00000356438	0	0	0	0	0.072	0	0.9	0.741	0.973
ANXA5	CASP3	9606.ENSP00000296511	9606.ENSP00000311032	0	0	0	0	0.063	0	0	0.919	0.921
AR	CCND1	9606.ENSP00000363822	9606.ENSP00000227507	0	0	0	0	0.072	0.738	0	0.831	0.955
AR	STAT3	9606.ENSP00000363822	9606.ENSP00000264657	0	0	0	0	0.048	0.626	0	0.761	0.907
AR	TP53	9606.ENSP00000363822	9606.ENSP00000269305	0	0	0	0	0	0.439	0	0.838	0.905
AR	FOXO1	9606.ENSP00000363822	9606.ENSP00000368880	0	0	0	0	0	0.516	0	0.843	0.921
AR	ESR1	9606.ENSP00000363822	9606.ENSP00000405330	0	0	0	0.651	0.172	0	0	0.978	0.981
AR	CTNNB1	9606.ENSP00000363822	9606.ENSP00000495360	0	0	0	0	0.052	0.888	0	0.968	0.996
BAX	TP53	9606.ENSP00000293288	9606.ENSP00000269305	0	0	0	0	0.08	0.782	0.9	0.774	0.994
BAX	BBC3	9606.ENSP00000293288	9606.ENSP00000404503	0	0	0	0	0.24	0.488	0.54	0.763	0.951
BAX	BCL2	9606.ENSP00000293288	9606.ENSP00000381185	0	0	0	0.641	0	0.991	0.9	0.972	0.999
BBC3	TP53	9606.ENSP00000404503	9606.ENSP00000269305	0	0	0	0	0	0.486	0.5	0.856	0.959
BBC3	BCL2	9606.ENSP00000404503	9606.ENSP00000381185	0	0	0	0	0.042	0.882	0.9	0.994	0.999
BCL2	MAPK1	9606.ENSP00000381185	9606.ENSP00000215832	0	0	0	0	0.086	0.292	0.9	0.586	0.969
BCL2	CCND1	9606.ENSP00000381185	9606.ENSP00000227507	0	0	0	0	0.052	0	0	0.957	0.958
BCL2	CTSD	9606.ENSP00000381185	9606.ENSP00000236671	0	0	0	0	0	0	0.9	0.514	0.949
BCL2	LGALS3	9606.ENSP00000381185	9606.ENSP00000254301	0	0	0	0	0.052	0	0	0.915	0.915
BCL2	STAT3	9606.ENSP00000381185	9606.ENSP00000264657	0	0	0	0	0	0.056	0.75	0.84	0.959
BCL2	TP53	9606.ENSP00000381185	9606.ENSP00000269305	0	0	0	0	0.103	0.869	0.9	0.999	0.999
BCL2	SOD1	9606.ENSP00000381185	9606.ENSP00000270142	0	0	0	0	0	0.329	0.9	0.976	0.998
BCL2	CTSK	9606.ENSP00000381185	9606.ENSP00000271651	0	0	0	0	0.079	0	0.9	0.285	0.928
BCL2	CASP3	9606.ENSP00000381185	9606.ENSP00000311032	0	0	0	0	0.098	0.354	0	0.98	0.987
BCL2	CTSB	9606.ENSP00000381185	9606.ENSP00000345672	0	0	0	0	0.055	0	0.9	0.49	0.947
BCL2	CASP8	9606.ENSP00000381185	9606.ENSP00000351273	0	0	0	0	0.086	0.648	0	0.954	0.984
BCL2	PARP1	9606.ENSP00000381185	9606.ENSP00000355759	0	0	0	0	0.112	0.292	0	0.879	0.917
BCL2	CTSS	9606.ENSP00000381185	9606.ENSP00000357981	0	0	0	0	0.091	0	0.9	0.459	0.946
BCL2	JUN	9606.ENSP00000381185	9606.ENSP00000360266	0	0	0	0	0.047	0	0	0.927	0.927
BCL2	MAPK8	9606.ENSP00000381185	9606.ENSP00000378974	0	0	0	0	0.094	0.287	0.9	0.713	0.979
BCL2	CREB1	9606.ENSP00000381185	9606.ENSP00000387699	0	0	0	0	0.061	0	0.75	0.708	0.925
BCL2	HIF1A	9606.ENSP00000381185	9606.ENSP00000437955	0	0	0	0	0	0.51	0	0.895	0.946
BDNF	CREB1	9606.ENSP00000414303	9606.ENSP00000387699	0	0	0	0	0	0	0	0.956	0.956
BDNF	IGF1R	9606.ENSP00000414303	9606.ENSP00000497069	0	0	0	0	0	0.044	0.65	0.745	0.907
BRAF	MAPK1	9606.ENSP00000419060	9606.ENSP00000215832	0	0	0	0.586	0.094	0.647	0.7	0.539	0.949
BRAF	PIK3CA	9606.ENSP00000419060	9606.ENSP00000263967	0	0	0	0	0.128	0.19	0	0.931	0.947
BRAF	MAP2K1	9606.ENSP00000419060	9606.ENSP00000302486	0	0	0	0.58	0.119	0.996	0.9	0.983	0.999
BRAF	GSK3B	9606.ENSP00000419060	9606.ENSP00000324806	0	0	0	0.577	0.049	0	0.9	0.283	0.925
BRAF	PTEN	9606.ENSP00000419060	9606.ENSP00000361021	0	0	0	0	0.094	0.206	0	0.927	0.943
BRAF	RAF1	9606.ENSP00000419060	9606.ENSP00000401888	0	0	0.066	0.945	0	0.927	0.9	0.983	0.999
BRAF	PRKCA	9606.ENSP00000419060	9606.ENSP00000408695	0	0	0	0.574	0	0.298	0.9	0.181	0.937
C1R	C1S	9606.ENSP00000444271	9606.ENSP00000385035	0	0	0.094	0.875	0.999	0.983	0.9	0.985	0.999
CASP1	IL1B	9606.ENSP00000433138	9606.ENSP00000263341	0	0	0	0	0.265	0.787	0.9	0.987	0.999
CASP1	IL18	9606.ENSP00000433138	9606.ENSP00000280357	0	0	0	0	0.105	0.292	0.9	0.979	0.998
CASP1	NLRP3	9606.ENSP00000433138	9606.ENSP00000337383	0	0	0	0	0.15	0.307	0.9	0.999	0.999
CASP1	CTSB	9606.ENSP00000433138	9606.ENSP00000345672	0	0	0	0	0.104	0.052	0.54	0.814	0.917
CASP1	CASP8	9606.ENSP00000433138	9606.ENSP00000351273	0	0	0	0.58	0.152	0.544	0.9	0.986	0.999
CASP1	TLR4	9606.ENSP00000433138	9606.ENSP00000363089	0	0	0	0	0.263	0.062	0	0.888	0.916
CASP1	TNF	9606.ENSP00000433138	9606.ENSP00000398698	0	0	0	0	0.171	0.091	0	0.883	0.904
CASP3	MAPK1	9606.ENSP00000311032	9606.ENSP00000215832	0	0	0	0	0.1	0.045	0.9	0.599	0.961
CASP3	TP53	9606.ENSP00000311032	9606.ENSP00000269305	0	0	0	0	0.093	0.292	0	0.937	0.956
CASP3	VIM	9606.ENSP00000311032	9606.ENSP00000446007	0	0	0	0	0.055	0.451	0.75	0.38	0.908
CASP3	FAS	9606.ENSP00000311032	9606.ENSP00000498466	0	0	0	0	0.116	0.071	0.36	0.851	0.911
CASP3	TNF	9606.ENSP00000311032	9606.ENSP00000398698	0	0	0	0	0.098	0.096	0	0.932	0.939
CASP3	MAPK8	9606.ENSP00000311032	9606.ENSP00000378974	0	0	0	0	0.049	0.292	0	0.922	0.943
CASP3	PRKCA	9606.ENSP00000311032	9606.ENSP00000408695	0	0	0	0	0.089	0	0.9	0.48	0.948
CASP3	CTNNB1	9606.ENSP00000311032	9606.ENSP00000495360	0	0	0	0	0.088	0.395	0.75	0.782	0.965
CASP3	MAPT	9606.ENSP00000311032	9606.ENSP00000340820	0	0	0	0	0	0.625	0.9	0.527	0.98
CASP3	CDKN1A	9606.ENSP00000311032	9606.ENSP00000384849	0	0	0	0	0.057	0.828	0.9	0.806	0.996
CASP3	CASP8	9606.ENSP00000311032	9606.ENSP00000351273	0	0	0.088	0.828	0.105	0.786	0.9	0.983	0.999
CASP3	PARP1	9606.ENSP00000311032	9606.ENSP00000355759	0	0	0	0	0.064	0.867	0.9	0.953	0.999
CASP8	IL1B	9606.ENSP00000351273	9606.ENSP00000263341	0	0	0	0	0.081	0.32	0.5	0.839	0.943
CASP8	TP53	9606.ENSP00000351273	9606.ENSP00000269305	0	0	0	0	0.086	0.292	0.9	0.879	0.991
CASP8	NLRP3	9606.ENSP00000351273	9606.ENSP00000337383	0	0	0	0	0.058	0.242	0	0.934	0.948
CASP8	TRAF6	9606.ENSP00000351273	9606.ENSP00000433623	0	0	0	0	0.094	0.76	0	0.909	0.978
CASP8	TNF	9606.ENSP00000351273	9606.ENSP00000398698	0	0	0	0	0.101	0.994	0	0.928	0.999
CASP8	FAS	9606.ENSP00000351273	9606.ENSP00000498466	0	0	0	0	0.127	0.927	0.9	0.997	0.999
CAT	SOD2	9606.ENSP00000241052	9606.ENSP00000446252	0.098	0	0	0	0.12	0.252	0.792	0.37	0.908
CAT	SOD1	9606.ENSP00000241052	9606.ENSP00000270142	0.115	0	0	0	0.155	0.25	0.792	0.425	0.92
CAV1	EGFR	9606.ENSP00000339191	9606.ENSP00000275493	0	0	0	0	0.206	0.882	0.8	0.986	0.999
CAV1	NOS3	9606.ENSP00000339191	9606.ENSP00000297494	0	0	0	0	0.044	0.736	0.8	0.995	0.999
CAV1	TGFBR1	9606.ENSP00000339191	9606.ENSP00000447297	0	0	0	0	0	0.376	0	0.858	0.907
CAV1	PTEN	9606.ENSP00000339191	9606.ENSP00000361021	0	0	0	0	0	0.345	0	0.872	0.912
CAV1	CTNNB1	9606.ENSP00000339191	9606.ENSP00000495360	0	0	0	0	0.043	0.514	0	0.886	0.942
CAV1	TLR4	9606.ENSP00000339191	9606.ENSP00000363089	0	0	0	0	0.051	0.292	0	0.949	0.962
CAV1	IGF1R	9606.ENSP00000339191	9606.ENSP00000497069	0	0	0	0	0	0.27	0	0.963	0.971
CAV1	ESR2	9606.ENSP00000339191	9606.ENSP00000343925	0	0	0	0	0.053	0.049	0.5	0.945	0.971
CAV1	DPP4	9606.ENSP00000339191	9606.ENSP00000353731	0	0	0	0	0.058	0	0	0.991	0.991
CAV1	ESR1	9606.ENSP00000339191	9606.ENSP00000405330	0	0	0	0	0.053	0.624	0.5	0.992	0.998
CCL17	CCL22	9606.ENSP00000219244	9606.ENSP00000219235	0	0	0	0.802	0.38	0	0.9	0.475	0.964
CCL17	CCL5	9606.ENSP00000219244	9606.ENSP00000474412	0	0	0	0.805	0.06	0.994	0.9	0.606	0.999
CCL22	IL10	9606.ENSP00000219235	9606.ENSP00000412237	0	0	0	0	0.432	0	0.4	0.764	0.912
CCL22	CCL5	9606.ENSP00000219235	9606.ENSP00000474412	0	0	0	0.844	0.097	0	0.9	0.246	0.926
CCL22	CXCL10	9606.ENSP00000219235	9606.ENSP00000305651	0	0	0	0	0.195	0	0.4	0.923	0.959
CCL5	NFKB1	9606.ENSP00000474412	9606.ENSP00000226574	0	0	0	0	0.116	0	0.9	0.748	0.975
CCL5	IFNG	9606.ENSP00000474412	9606.ENSP00000229135	0	0	0	0	0.297	0	0	0.892	0.921
CCL5	IL1B	9606.ENSP00000474412	9606.ENSP00000263341	0	0	0	0	0.148	0	0.4	0.888	0.938
CCL5	CXCL10	9606.ENSP00000474412	9606.ENSP00000305651	0	0	0	0	0.362	0.994	0.5	0.95	0.999
CCL5	JUN	9606.ENSP00000474412	9606.ENSP00000360266	0	0	0	0	0.048	0	0.9	0.547	0.953
CCL5	CXCL12	9606.ENSP00000474412	9606.ENSP00000379140	0	0	0	0	0.062	0.994	0.5	0.904	0.999
CCL5	RELA	9606.ENSP00000474412	9606.ENSP00000384273	0	0	0	0	0.059	0.079	0.9	0.475	0.948
CCL5	IL6	9606.ENSP00000474412	9606.ENSP00000385675	0	0	0	0	0.127	0	0.4	0.912	0.95
CCL5	TNF	9606.ENSP00000474412	9606.ENSP00000398698	0	0	0	0	0.202	0	0.4	0.924	0.96
CCL5	IL10	9606.ENSP00000474412	9606.ENSP00000412237	0	0	0	0	0.229	0	0.4	0.89	0.945
CCND1	ERBB2	9606.ENSP00000227507	9606.ENSP00000269571	0	0	0	0	0.084	0.301	0	0.862	0.904
CCND1	JUN	9606.ENSP00000227507	9606.ENSP00000360266	0	0	0	0	0.042	0.292	0.5	0.79	0.919
CCND1	FOS	9606.ENSP00000227507	9606.ENSP00000306245	0	0	0	0	0.055	0.469	0.5	0.799	0.942
CCND1	TP53	9606.ENSP00000227507	9606.ENSP00000269305	0	0	0	0	0	0.292	0	0.928	0.946
CCND1	CREB1	9606.ENSP00000227507	9606.ENSP00000387699	0	0	0	0	0	0	0.75	0.805	0.949
CCND1	CTNNB1	9606.ENSP00000227507	9606.ENSP00000495360	0	0	0	0	0.073	0.3	0.5	0.926	0.972
CCND1	STAT3	9606.ENSP00000227507	9606.ENSP00000264657	0	0	0	0	0.054	0.644	0.5	0.898	0.98
CCND1	GSK3B	9606.ENSP00000227507	9606.ENSP00000324806	0	0	0	0	0	0.409	0.9	0.803	0.987
CCND1	ESR1	9606.ENSP00000227507	9606.ENSP00000405330	0	0	0	0	0.069	0.625	0.75	0.971	0.997
CCND1	CDKN1A	9606.ENSP00000227507	9606.ENSP00000384849	0	0	0	0	0.118	0.996	0.9	0.995	0.999
CD4	TLR4	9606.ENSP00000011653	9606.ENSP00000363089	0	0	0	0	0.128	0.097	0	0.886	0.902
CD4	PLAT	9606.ENSP00000011653	9606.ENSP00000220809	0	0	0	0	0	0.907	0	0.408	0.942
CD4	IL1B	9606.ENSP00000011653	9606.ENSP00000263341	0	0	0.238	0	0.108	0	0	0.944	0.958
CD4	IL6	9606.ENSP00000011653	9606.ENSP00000385675	0	0	0	0	0	0	0	0.966	0.966
CD4	TNF	9606.ENSP00000011653	9606.ENSP00000398698	0	0	0	0	0.092	0	0	0.966	0.968
CD4	IL2	9606.ENSP00000011653	9606.ENSP00000226730	0	0	0	0	0.052	0	0	0.975	0.975
CD4	IL10	9606.ENSP00000011653	9606.ENSP00000412237	0	0	0	0	0.094	0	0	0.974	0.976
CD4	SYK	9606.ENSP00000011653	9606.ENSP00000364898	0	0	0	0	0.156	0.321	0.9	0.709	0.981
CD4	IFNG	9606.ENSP00000011653	9606.ENSP00000229135	0	0	0	0	0.094	0	0	0.991	0.991
CDH2	FGFR1	9606.ENSP00000269141	9606.ENSP00000393312	0	0	0	0	0.122	0.516	0	0.885	0.946
CDH2	CTNNB1	9606.ENSP00000269141	9606.ENSP00000495360	0	0	0	0	0.061	0.942	0.72	0.999	0.999
CDKN1A	STAT3	9606.ENSP00000384849	9606.ENSP00000264657	0	0	0	0	0.125	0.828	0.5	0.815	0.984
CDKN1A	TP53	9606.ENSP00000384849	9606.ENSP00000269305	0	0	0	0	0	0.925	0.9	0.96	0.999
CDKN1A	FOXO3	9606.ENSP00000384849	9606.ENSP00000339527	0	0	0	0	0.072	0.294	0	0.994	0.995
COL18A1	MMP2	9606.ENSP00000352798	9606.ENSP00000219070	0	0	0	0	0.115	0.503	0.75	0.687	0.96
COL18A1	MMP9	9606.ENSP00000352798	9606.ENSP00000361405	0	0	0	0	0.11	0.238	0.75	0.588	0.92
CREB1	MAPK1	9606.ENSP00000387699	9606.ENSP00000215832	0	0	0	0	0.194	0	0.9	0.575	0.962
CREB1	NR3C1	9606.ENSP00000387699	9606.ENSP00000231509	0	0	0	0	0.117	0.512	0	0.837	0.924
CREB1	JUND	9606.ENSP00000387699	9606.ENSP00000252818	0	0	0	0	0.042	0.398	0.5	0.893	0.965
CREB1	STAT3	9606.ENSP00000387699	9606.ENSP00000264657	0	0	0	0	0.074	0.292	0.5	0.795	0.924
CREB1	TP53	9606.ENSP00000387699	9606.ENSP00000269305	0	0	0	0	0.049	0.776	0	0.992	0.998
CREB1	FOS	9606.ENSP00000387699	9606.ENSP00000306245	0	0	0	0	0.052	0	0.5	0.996	0.998
CREB1	GSK3B	9606.ENSP00000387699	9606.ENSP00000324806	0	0	0	0	0.163	0.292	0.9	0.826	0.988
CREB1	CTSS	9606.ENSP00000387699	9606.ENSP00000357981	0	0	0	0	0.116	0	0.9	0.203	0.923
CREB1	JUN	9606.ENSP00000387699	9606.ENSP00000360266	0	0	0	0	0	0.4	0	0.997	0.998
CREB1	FOXO1	9606.ENSP00000387699	9606.ENSP00000368880	0	0	0	0	0.082	0.091	0	0.911	0.92
CREB1	RELA	9606.ENSP00000387699	9606.ENSP00000384273	0	0	0	0	0.101	0	0	0.986	0.986
CREB1	IL6	9606.ENSP00000387699	9606.ENSP00000385675	0	0	0	0	0.083	0	0.75	0.674	0.918
CREB1	CTNNB1	9606.ENSP00000387699	9606.ENSP00000495360	0	0	0	0	0.123	0.625	0	0.862	0.95
CTNNB1	NFKB1	9606.ENSP00000495360	9606.ENSP00000226574	0	0	0	0	0.06	0.777	0	0.845	0.964
CTNNB1	PIK3CA	9606.ENSP00000495360	9606.ENSP00000263967	0	0	0	0	0.049	0.13	0	0.89	0.901
CTNNB1	TP53	9606.ENSP00000495360	9606.ENSP00000269305	0	0	0	0	0.049	0	0	0.927	0.927
CTNNB1	ERBB2	9606.ENSP00000495360	9606.ENSP00000269571	0	0	0	0	0	0.662	0.9	0.954	0.998
CTNNB1	EGFR	9606.ENSP00000495360	9606.ENSP00000275493	0	0	0	0	0.064	0.718	0.9	0.94	0.998
CTNNB1	PPARG	9606.ENSP00000495360	9606.ENSP00000287820	0	0	0	0	0.052	0.735	0	0.98	0.994
CTNNB1	MET	9606.ENSP00000495360	9606.ENSP00000317272	0	0	0	0	0.042	0.364	0.9	0.792	0.985
CTNNB1	GSK3B	9606.ENSP00000495360	9606.ENSP00000324806	0	0	0	0	0.054	0.991	0.9	0.999	0.999
CTNNB1	FOXO3	9606.ENSP00000495360	9606.ENSP00000339527	0	0	0	0	0.049	0.546	0.36	0.993	0.998
CTNNB1	PTEN	9606.ENSP00000495360	9606.ENSP00000361021	0	0	0	0	0.069	0.527	0	0.881	0.943
CTNNB1	FOXO1	9606.ENSP00000495360	9606.ENSP00000368880	0	0	0	0	0	0.113	0	0.983	0.985
CTNNB1	RELA	9606.ENSP00000495360	9606.ENSP00000384273	0	0	0	0	0.044	0.535	0	0.835	0.92
CTNNB1	FGFR1	9606.ENSP00000495360	9606.ENSP00000393312	0	0	0	0	0.088	0.777	0	0.762	0.947
CTNNB1	ESR1	9606.ENSP00000495360	9606.ENSP00000405330	0	0	0	0	0.052	0.301	0	0.952	0.965
CTNNB1	HIF1A	9606.ENSP00000495360	9606.ENSP00000437955	0	0	0	0	0.26	0.785	0	0.989	0.998
CTNNB1	PECAM1	9606.ENSP00000495360	9606.ENSP00000457421	0	0	0	0	0.067	0.606	0.9	0.963	0.998
CTNNB1	PTPN11	9606.ENSP00000495360	9606.ENSP00000489597	0	0	0	0	0.055	0.297	0	0.864	0.902
CTNNB1	IGF1R	9606.ENSP00000495360	9606.ENSP00000497069	0	0	0	0	0.063	0.397	0.9	0.777	0.985
CTSB	CTSD	9606.ENSP00000345672	9606.ENSP00000236671	0	0	0	0	0.483	0.177	0.4	0.923	0.977
CTSB	NLRP3	9606.ENSP00000345672	9606.ENSP00000337383	0	0	0	0	0.045	0	0.9	0.937	0.993
CTSB	CTSS	9606.ENSP00000345672	9606.ENSP00000357981	0	0	0.121	0.67	0.206	0.109	0.9	0.431	0.958
CTSD	CTSS	9606.ENSP00000236671	9606.ENSP00000357981	0	0	0	0	0.115	0.115	0	0.882	0.9
CTSG	MMP9	9606.ENSP00000216336	9606.ENSP00000361405	0	0	0	0	0.097	0	0.4	0.987	0.992
CTSG	ELANE	9606.ENSP00000216336	9606.ENSP00000466090	0	0	0.132	0.815	0.987	0	0.4	0.985	0.999
CTSG	MPO	9606.ENSP00000216336	9606.ENSP00000225275	0	0	0	0	0.961	0.044	0	0.997	0.999
CTSS	MPO	9606.ENSP00000357981	9606.ENSP00000225275	0	0	0	0	0.085	0	0	0.963	0.964
CXCL10	IFNG	9606.ENSP00000305651	9606.ENSP00000229135	0	0	0	0	0.321	0	0	0.942	0.959
CXCL10	IL1B	9606.ENSP00000305651	9606.ENSP00000263341	0	0	0	0	0.229	0	0.4	0.925	0.962
CXCL10	STAT1	9606.ENSP00000305651	9606.ENSP00000354394	0	0	0	0	0.557	0	0	0.89	0.949
CXCL10	IL6	9606.ENSP00000305651	9606.ENSP00000385675	0	0	0	0	0.203	0	0.4	0.923	0.96
CXCL10	IL10	9606.ENSP00000305651	9606.ENSP00000412237	0	0	0	0	0.225	0	0.4	0.925	0.962
CXCL10	TNF	9606.ENSP00000305651	9606.ENSP00000398698	0	0	0	0	0.265	0	0.4	0.93	0.966
CXCL10	TLR4	9606.ENSP00000305651	9606.ENSP00000363089	0	0	0	0	0.081	0	0	0.968	0.969
CXCL10	CXCL12	9606.ENSP00000305651	9606.ENSP00000379140	0	0	0	0	0.104	0.994	0.5	0.857	0.999
CXCL12	KIT	9606.ENSP00000379140	9606.ENSP00000288135	0	0	0	0	0.099	0	0	0.972	0.974
CXCL12	MET	9606.ENSP00000379140	9606.ENSP00000317272	0	0	0	0	0	0	0	0.902	0.902
CYP19A1	ESR2	9606.ENSP00000379683	9606.ENSP00000343925	0	0	0	0	0.048	0.056	0	0.923	0.925
CYP19A1	ESR1	9606.ENSP00000379683	9606.ENSP00000405330	0	0	0	0	0.042	0.056	0	0.925	0.927
CYP2C9	PTGS2	9606.ENSP00000260682	9606.ENSP00000356438	0	0	0	0	0.056	0	0.9	0.377	0.936
CYP2C9	PTGS1	9606.ENSP00000260682	9606.ENSP00000354612	0	0	0	0	0.056	0	0.9	0.379	0.936
CYP2C9	GSTP1	9606.ENSP00000260682	9606.ENSP00000381607	0	0	0	0	0.109	0.045	0.9	0.494	0.951
DNMT1	STAT3	9606.ENSP00000352516	9606.ENSP00000264657	0	0	0	0	0.049	0.512	0	0.915	0.957
DNMT1	DNMT3A	9606.ENSP00000352516	9606.ENSP00000264709	0	0	0	0	0.069	0.633	0.9	0.995	0.999
DNMT1	TP53	9606.ENSP00000352516	9606.ENSP00000269305	0	0	0	0	0.059	0.597	0	0.994	0.997
DNMT1	DNMT3B	9606.ENSP00000352516	9606.ENSP00000328547	0	0	0	0	0.095	0.837	0.9	0.999	0.999
DNMT1	PARP1	9606.ENSP00000352516	9606.ENSP00000355759	0	0	0	0	0.326	0.634	0	0.822	0.952
DNMT3A	DNMT3B	9606.ENSP00000264709	9606.ENSP00000328547	0	0	0.069	0.937	0.093	0.876	0.9	0.859	0.998
EDN1	MMP2	9606.ENSP00000368683	9606.ENSP00000219070	0	0	0	0	0.042	0	0.9	0.601	0.958
EDN1	MMP9	9606.ENSP00000368683	9606.ENSP00000361405	0	0	0	0	0.044	0	0.9	0.648	0.963
EGF	TGFB1	9606.ENSP00000265171	9606.ENSP00000221930	0	0	0	0	0	0	0	0.904	0.904
EGF	FGF2	9606.ENSP00000265171	9606.ENSP00000264498	0	0	0	0	0	0.053	0	0.968	0.969
EGF	STAT3	9606.ENSP00000265171	9606.ENSP00000264657	0	0	0	0	0	0	0	0.907	0.907
EGF	FGF10	9606.ENSP00000265171	9606.ENSP00000264664	0	0	0	0	0	0.053	0	0.989	0.99
EGF	FLT1	9606.ENSP00000265171	9606.ENSP00000282397	0	0	0	0	0	0	0.65	0.731	0.902
EGF	PIK3R1	9606.ENSP00000265171	9606.ENSP00000428056	0	0	0	0	0	0.292	0.4	0.809	0.911
EGF	FGFR1	9606.ENSP00000265171	9606.ENSP00000393312	0	0	0	0	0	0	0.65	0.799	0.926
EGF	FGFR2	9606.ENSP00000265171	9606.ENSP00000410294	0	0	0	0	0	0	0.65	0.825	0.936
EGF	MET	9606.ENSP00000265171	9606.ENSP00000317272	0	0	0	0	0	0	0.65	0.851	0.945
EGF	KIT	9606.ENSP00000265171	9606.ENSP00000288135	0	0	0	0	0.044	0	0.9	0.741	0.973
EGF	IGF1	9606.ENSP00000265171	9606.ENSP00000376637	0	0	0	0	0	0	0.9	0.957	0.995
EGF	IGF1R	9606.ENSP00000265171	9606.ENSP00000497069	0	0	0	0	0	0.062	0.9	0.979	0.997
EGF	ERBB2	9606.ENSP00000265171	9606.ENSP00000269571	0	0	0	0	0.128	0.314	0.9	0.998	0.999
EGF	EGFR	9606.ENSP00000265171	9606.ENSP00000275493	0	0	0	0	0.128	0.999	0.9	0.999	0.999
EGFR	TGFB1	9606.ENSP00000275493	9606.ENSP00000221930	0	0	0	0	0	0.152	0	0.972	0.975
EGFR	LGALS3	9606.ENSP00000275493	9606.ENSP00000254301	0	0	0	0	0.073	0.6	0	0.913	0.964
EGFR	PIK3CA	9606.ENSP00000275493	9606.ENSP00000263967	0	0	0	0	0	0.79	0.9	0.976	0.999
EGFR	FGF2	9606.ENSP00000275493	9606.ENSP00000264498	0	0	0	0	0.099	0	0.65	0.877	0.957
EGFR	STAT3	9606.ENSP00000275493	9606.ENSP00000264657	0	0	0	0	0.042	0.925	0	0.985	0.998
EGFR	FGF10	9606.ENSP00000275493	9606.ENSP00000264664	0	0	0	0	0.062	0	0.65	0.794	0.926
EGFR	TP53	9606.ENSP00000275493	9606.ENSP00000269305	0	0	0	0	0	0.329	0	0.919	0.943
EGFR	ERBB2	9606.ENSP00000275493	9606.ENSP00000269571	0	0	0.064	0.939	0.08	0.998	0.9	0.983	0.999
EGFR	PRKCA	9606.ENSP00000275493	9606.ENSP00000408695	0	0	0	0.562	0.049	0.788	0	0.693	0.932
EGFR	HIF1A	9606.ENSP00000275493	9606.ENSP00000437955	0	0	0	0	0.055	0	0.5	0.873	0.934
EGFR	FOS	9606.ENSP00000275493	9606.ENSP00000306245	0	0	0	0	0.086	0.591	0.4	0.765	0.94
EGFR	PTEN	9606.ENSP00000275493	9606.ENSP00000361021	0	0	0	0	0	0.608	0	0.925	0.969
EGFR	STAT1	9606.ENSP00000275493	9606.ENSP00000354394	0	0	0	0	0.042	0.84	0	0.851	0.975
EGFR	IL6	9606.ENSP00000275493	9606.ENSP00000385675	0	0	0	0	0.042	0	0.65	0.943	0.979
EGFR	ESR1	9606.ENSP00000275493	9606.ENSP00000405330	0	0	0	0	0	0.583	0	0.974	0.988
EGFR	IGF1R	9606.ENSP00000275493	9606.ENSP00000497069	0	0	0	0.571	0.113	0.585	0	0.972	0.989
EGFR	IGF1	9606.ENSP00000275493	9606.ENSP00000376637	0	0	0	0	0	0	0.9	0.919	0.991
EGFR	MET	9606.ENSP00000275493	9606.ENSP00000317272	0	0	0	0.582	0.25	0.806	0	0.978	0.996
EGFR	PIK3R1	9606.ENSP00000275493	9606.ENSP00000428056	0	0	0	0	0.042	0.9	0.9	0.901	0.998
EGFR	PTPN11	9606.ENSP00000275493	9606.ENSP00000489597	0	0	0	0	0.042	0.995	0.9	0.991	0.999
ELANE	MPO	9606.ENSP00000466090	9606.ENSP00000225275	0	0	0	0	0.999	0.164	0	0.999	0.999
ELANE	MMP9	9606.ENSP00000466090	9606.ENSP00000361405	0	0	0	0	0.085	0	0	0.972	0.973
ELANE	SERPINA1	9606.ENSP00000466090	9606.ENSP00000416066	0	0	0	0	0.058	0.61	0	0.999	0.999
ERBB2	PIK3CA	9606.ENSP00000269571	9606.ENSP00000263967	0	0	0	0	0	0.115	0.9	0.927	0.992
ERBB2	STAT3	9606.ENSP00000269571	9606.ENSP00000264657	0	0	0	0	0.049	0.717	0	0.823	0.948
ERBB2	TP53	9606.ENSP00000269571	9606.ENSP00000269305	0	0	0	0	0.06	0.172	0	0.924	0.935
ERBB2	PTPN11	9606.ENSP00000269571	9606.ENSP00000489597	0	0	0	0	0	0.847	0	0.82	0.971
ERBB2	ESR1	9606.ENSP00000269571	9606.ENSP00000405330	0	0	0	0	0	0.329	0	0.966	0.976
ERBB2	PGR	9606.ENSP00000269571	9606.ENSP00000325120	0	0	0	0	0	0.329	0	0.972	0.98
ERBB2	IGF1	9606.ENSP00000269571	9606.ENSP00000376637	0	0	0	0	0	0	0.9	0.926	0.992
ERBB2	IGF1R	9606.ENSP00000269571	9606.ENSP00000497069	0	0	0	0.569	0.083	0.693	0	0.979	0.993
ERBB2	PIK3R1	9606.ENSP00000269571	9606.ENSP00000428056	0	0	0	0	0	0.84	0.9	0.728	0.995
ESR1	MAPK1	9606.ENSP00000405330	9606.ENSP00000215832	0	0	0	0	0	0.625	0.9	0.681	0.987
ESR1	NFKB1	9606.ENSP00000405330	9606.ENSP00000226574	0	0	0	0	0	0.51	0	0.916	0.957
ESR1	MAPK14	9606.ENSP00000405330	9606.ENSP00000229795	0	0	0	0	0	0	0.9	0.561	0.954
ESR1	PIK3CA	9606.ENSP00000405330	9606.ENSP00000263967	0	0	0	0	0	0.51	0.4	0.817	0.941
ESR1	STAT3	9606.ENSP00000405330	9606.ENSP00000264657	0	0	0	0	0.042	0.476	0	0.873	0.93
ESR1	TP53	9606.ENSP00000405330	9606.ENSP00000269305	0	0	0	0	0	0.735	0	0.974	0.992
ESR1	FOS	9606.ENSP00000405330	9606.ENSP00000306245	0	0	0	0	0.044	0.522	0.9	0.994	0.999
ESR1	PGR	9606.ENSP00000405330	9606.ENSP00000325120	0	0	0	0.673	0.24	0.771	0.7	0.56	0.974
ESR1	SP1	9606.ENSP00000405330	9606.ENSP00000329357	0	0	0	0	0	0.892	0.9	0.979	0.999
ESR1	ESR2	9606.ENSP00000405330	9606.ENSP00000343925	0	0	0.062	0.923	0.042	0.83	0.9	0.934	0.998
ESR1	STAT1	9606.ENSP00000405330	9606.ENSP00000354394	0	0	0	0	0.043	0.304	0.5	0.775	0.915
ESR1	JUN	9606.ENSP00000405330	9606.ENSP00000360266	0	0	0	0	0	0.631	0.9	0.995	0.999
ESR1	FOXO1	9606.ENSP00000405330	9606.ENSP00000368880	0	0	0	0	0.042	0.63	0	0.79	0.919
ESR1	IGF1	9606.ENSP00000405330	9606.ENSP00000376637	0	0	0	0	0.062	0	0	0.964	0.964
ESR1	MAPK8	9606.ENSP00000405330	9606.ENSP00000378974	0	0	0	0	0	0	0.9	0.659	0.964
ESR1	RELA	9606.ENSP00000405330	9606.ENSP00000384273	0	0	0	0	0	0.787	0	0.904	0.978
ESR1	HIF1A	9606.ENSP00000405330	9606.ENSP00000437955	0	0	0	0	0.067	0.636	0	0.861	0.948
ESR1	PIK3R1	9606.ENSP00000405330	9606.ENSP00000428056	0	0	0	0	0	0.708	0.4	0.971	0.994
ESR1	IGF1R	9606.ENSP00000405330	9606.ENSP00000497069	0	0	0	0	0.063	0.743	0.5	0.994	0.999
ESR2	MAPK1	9606.ENSP00000343925	9606.ENSP00000215832	0	0	0	0	0	0.292	0.9	0.332	0.948
ESR2	MAPK14	9606.ENSP00000343925	9606.ENSP00000229795	0	0	0	0	0	0	0.9	0.247	0.921
ESR2	FOS	9606.ENSP00000343925	9606.ENSP00000306245	0	0	0	0	0	0.095	0.9	0.611	0.961
ESR2	SP1	9606.ENSP00000343925	9606.ENSP00000329357	0	0	0	0	0	0.523	0.9	0.786	0.988
ESR2	MAPK8	9606.ENSP00000343925	9606.ENSP00000378974	0	0	0	0	0	0	0.9	0.269	0.923
ESR2	JUN	9606.ENSP00000343925	9606.ENSP00000360266	0	0	0	0	0	0.057	0.9	0.686	0.967
FABP4	PPARG	9606.ENSP00000256104	9606.ENSP00000287820	0	0	0	0	0.222	0.05	0.5	0.983	0.993
FAS	TNF	9606.ENSP00000498466	9606.ENSP00000398698	0	0	0	0	0.128	0.292	0	0.997	0.997
FGF10	FGFR1	9606.ENSP00000264664	9606.ENSP00000393312	0	0	0	0	0.042	0.296	0.9	0.997	0.999
FGF10	FGFR2	9606.ENSP00000264664	9606.ENSP00000410294	0	0	0	0	0.044	0.983	0.9	0.998	0.999
FGF2	TGFB1	9606.ENSP00000264498	9606.ENSP00000221930	0	0	0	0	0.062	0	0.4	0.97	0.982
FGF2	IGF1R	9606.ENSP00000264498	9606.ENSP00000497069	0	0	0	0	0	0	0.65	0.726	0.9
FGF2	MET	9606.ENSP00000264498	9606.ENSP00000317272	0	0	0	0	0.092	0	0.65	0.725	0.905
FGF2	MMP9	9606.ENSP00000264498	9606.ENSP00000361405	0	0	0	0	0.049	0	0.4	0.87	0.919
FGF2	FLT1	9606.ENSP00000264498	9606.ENSP00000282397	0	0	0	0	0.074	0.168	0.65	0.978	0.993
FGF2	FGFR2	9606.ENSP00000264498	9606.ENSP00000410294	0	0	0	0	0.067	0.919	0.9	0.997	0.999
FGF2	FGFR1	9606.ENSP00000264498	9606.ENSP00000393312	0	0	0	0	0.11	0.995	0.9	0.998	0.999
FGFR1	PIK3CA	9606.ENSP00000393312	9606.ENSP00000263967	0	0	0	0	0	0.087	0.9	0.777	0.977
FGFR1	PIK3R1	9606.ENSP00000393312	9606.ENSP00000428056	0	0	0	0	0.042	0.813	0.9	0.653	0.992
FGFR2	PIK3CA	9606.ENSP00000410294	9606.ENSP00000263967	0	0	0	0	0	0.087	0.65	0.737	0.908
FGFR2	PIK3R1	9606.ENSP00000410294	9606.ENSP00000428056	0	0	0	0	0.042	0.416	0.65	0.659	0.924
FLT1	PIK3R1	9606.ENSP00000282397	9606.ENSP00000428056	0	0	0	0	0	0.67	0.65	0.281	0.909
FLT1	PGF	9606.ENSP00000282397	9606.ENSP00000451040	0	0	0	0	0.074	0.977	0.7	0.999	0.999
FOS	MAPK1	9606.ENSP00000306245	9606.ENSP00000215832	0	0	0	0	0.055	0.45	0.9	0.864	0.992
FOS	MAPK14	9606.ENSP00000306245	9606.ENSP00000229795	0	0	0	0	0.067	0.256	0.9	0.814	0.985
FOS	NR3C1	9606.ENSP00000306245	9606.ENSP00000231509	0	0	0	0	0	0.108	0	0.958	0.961
FOS	JUND	9606.ENSP00000306245	9606.ENSP00000252818	0	0	0	0	0.155	0.907	0.9	0.998	0.999
FOS	STAT3	9606.ENSP00000306245	9606.ENSP00000264657	0	0	0	0	0.132	0.429	0.5	0.984	0.995
FOS	TP53	9606.ENSP00000306245	9606.ENSP00000269305	0	0	0	0	0.053	0.23	0.5	0.884	0.952
FOS	JUNB	9606.ENSP00000306245	9606.ENSP00000303315	0	0	0	0	0.809	0.907	0.9	0.995	0.999
FOS	RELA	9606.ENSP00000306245	9606.ENSP00000384273	0	0	0	0	0.101	0.528	0	0.82	0.917
FOS	SP1	9606.ENSP00000306245	9606.ENSP00000329357	0	0	0	0	0	0.066	0.9	0.453	0.944
FOS	PRKCA	9606.ENSP00000306245	9606.ENSP00000408695	0	0	0	0	0.049	0	0.9	0.48	0.946
FOS	MAPK8	9606.ENSP00000306245	9606.ENSP00000378974	0	0	0	0	0	0.174	0.9	0.849	0.986
FOS	FOSL1	9606.ENSP00000306245	9606.ENSP00000310170	0	0	0	0.866	0.048	0	0.9	0.984	0.998
FOS	JUN	9606.ENSP00000306245	9606.ENSP00000360266	0	0	0	0	0.69	0.999	0.9	0.999	0.999
FOSL1	JUND	9606.ENSP00000310170	9606.ENSP00000252818	0	0	0	0	0.062	0.76	0.9	0.998	0.999
FOSL1	JUNB	9606.ENSP00000310170	9606.ENSP00000303315	0	0	0	0	0.101	0.83	0.9	0.996	0.999
FOSL1	MAPK8	9606.ENSP00000310170	9606.ENSP00000378974	0	0	0	0	0	0.166	0.9	0.429	0.948
FOSL1	JUN	9606.ENSP00000310170	9606.ENSP00000360266	0	0	0	0	0.09	0.872	0.9	0.996	0.999
FOXO1	MAPK1	9606.ENSP00000368880	9606.ENSP00000215832	0	0	0	0	0	0.057	0.9	0.425	0.941
FOXO1	MAPK14	9606.ENSP00000368880	9606.ENSP00000229795	0	0	0	0	0	0.057	0.9	0.373	0.935
FOXO1	STAT3	9606.ENSP00000368880	9606.ENSP00000264657	0	0	0	0	0.075	0	0.9	0.644	0.964
FOXO1	FOXO3	9606.ENSP00000368880	9606.ENSP00000339527	0	0	0	0.895	0.073	0	0.9	0.562	0.955
FOXO1	PTEN	9606.ENSP00000368880	9606.ENSP00000361021	0	0	0	0	0.064	0.099	0	0.894	0.903
FOXO1	SOD2	9606.ENSP00000368880	9606.ENSP00000446252	0	0	0	0	0.049	0	0.75	0.628	0.903
FOXO1	IGF1	9606.ENSP00000368880	9606.ENSP00000376637	0	0	0	0	0.068	0	0	0.908	0.91
FOXO1	IKBKB	9606.ENSP00000368880	9606.ENSP00000430684	0	0	0	0	0.049	0.094	0.9	0.427	0.944
FOXO1	MAPK8	9606.ENSP00000368880	9606.ENSP00000378974	0	0	0	0	0.049	0.099	0.9	0.498	0.951
FOXO3	MAPK1	9606.ENSP00000339527	9606.ENSP00000215832	0	0	0	0	0.147	0.303	0.9	0.461	0.963
FOXO3	MAPK14	9606.ENSP00000339527	9606.ENSP00000229795	0	0	0	0	0.18	0.057	0.9	0.422	0.949
FOXO3	STAT3	9606.ENSP00000339527	9606.ENSP00000264657	0	0	0	0	0.081	0	0.9	0.787	0.978
FOXO3	TP53	9606.ENSP00000339527	9606.ENSP00000269305	0	0	0	0	0	0.776	0	0.991	0.998
FOXO3	MAPK8	9606.ENSP00000339527	9606.ENSP00000378974	0	0	0	0	0.06	0.099	0.9	0.525	0.954
FOXO3	SOD2	9606.ENSP00000339527	9606.ENSP00000446252	0	0	0	0	0.06	0.292	0.75	0.866	0.974
FOXO3	IKBKB	9606.ENSP00000339527	9606.ENSP00000430684	0	0	0	0	0.06	0.694	0.9	0.663	0.989
FOXO3	HIF1A	9606.ENSP00000339527	9606.ENSP00000437955	0	0	0	0	0.049	0.311	0.4	0.995	0.997
GPI	TPI1	9606.ENSP00000405573	9606.ENSP00000229270	0.229	0	0	0	0.975	0.394	0.8	0.846	0.999
GSK3B	TP53	9606.ENSP00000324806	9606.ENSP00000269305	0	0	0	0	0	0.633	0	0.981	0.992
GSK3B	MAP2K1	9606.ENSP00000324806	9606.ENSP00000302486	0	0	0	0.6	0.075	0.161	0.9	0.312	0.939
GSK3B	PTEN	9606.ENSP00000324806	9606.ENSP00000361021	0	0	0	0	0.056	0.092	0	0.899	0.906
GSK3B	JUN	9606.ENSP00000324806	9606.ENSP00000360266	0	0	0	0	0.059	0.697	0	0.704	0.908
GSK3B	RAF1	9606.ENSP00000324806	9606.ENSP00000401888	0	0	0	0.575	0.061	0	0.9	0.241	0.922
GSK3B	NFE2L2	9606.ENSP00000324806	9606.ENSP00000380252	0	0	0	0	0.049	0.547	0.75	0.62	0.953
GSK3B	TRAF6	9606.ENSP00000324806	9606.ENSP00000433623	0	0	0	0	0.069	0.983	0	0.646	0.994
GSK3B	MAPT	9606.ENSP00000324806	9606.ENSP00000340820	0	0	0	0	0	0.942	0.9	0.943	0.999
GSR	NFE2L2	9606.ENSP00000221130	9606.ENSP00000380252	0	0	0	0	0.049	0	0.75	0.731	0.93
GSR	GSTP1	9606.ENSP00000221130	9606.ENSP00000381607	0	0	0	0	0.069	0	0.9	0.527	0.952
GSTP1	JUN	9606.ENSP00000381607	9606.ENSP00000360266	0	0	0	0	0.045	0.131	0	0.92	0.927
GSTP1	MAPK8	9606.ENSP00000381607	9606.ENSP00000378974	0	0	0	0	0.042	0.805	0	0.875	0.974
HIF1A	MAPK1	9606.ENSP00000437955	9606.ENSP00000215832	0	0	0	0	0.049	0.626	0.9	0.648	0.985
HIF1A	STAT3	9606.ENSP00000437955	9606.ENSP00000264657	0	0	0	0	0.115	0.738	0.75	0.923	0.994
HIF1A	TP53	9606.ENSP00000437955	9606.ENSP00000269305	0	0	0	0	0	0.847	0	0.994	0.999
HIF1A	SP1	9606.ENSP00000437955	9606.ENSP00000329357	0	0	0	0	0	0.678	0	0.771	0.923
HIF1A	JUN	9606.ENSP00000437955	9606.ENSP00000360266	0	0	0	0	0.056	0.621	0	0.901	0.961
HIF1A	RELA	9606.ENSP00000437955	9606.ENSP00000384273	0	0	0	0	0.079	0.292	0	0.985	0.989
HMGCR	SREBF2	9606.ENSP00000287936	9606.ENSP00000354476	0	0	0	0	0.115	0	0.75	0.941	0.985
HSPA5	SOD1	9606.ENSP00000324173	9606.ENSP00000270142	0	0	0	0	0.093	0.236	0.9	0.691	0.975
IFNG	NFKB1	9606.ENSP00000229135	9606.ENSP00000226574	0	0	0	0	0.09	0	0	0.929	0.932
IFNG	IL2	9606.ENSP00000229135	9606.ENSP00000226730	0	0	0	0	0.295	0	0	0.987	0.99
IFNG	STAT3	9606.ENSP00000229135	9606.ENSP00000264657	0	0	0	0	0.058	0	0	0.905	0.907
IFNG	TLR4	9606.ENSP00000229135	9606.ENSP00000363089	0	0	0	0	0.056	0	0	0.945	0.946
IFNG	IL18	9606.ENSP00000229135	9606.ENSP00000280357	0	0	0	0	0.104	0	0	0.945	0.949
IFNG	IL6	9606.ENSP00000229135	9606.ENSP00000385675	0	0	0	0	0.128	0	0	0.981	0.983
IFNG	STAT1	9606.ENSP00000229135	9606.ENSP00000354394	0	0	0	0	0.131	0	0.5	0.971	0.986
IFNG	TNF	9606.ENSP00000229135	9606.ENSP00000398698	0	0	0	0	0.202	0	0	0.99	0.991
IFNG	IL10	9606.ENSP00000229135	9606.ENSP00000412237	0	0	0	0	0.566	0	0	0.989	0.995
IFNG	IL1B	9606.ENSP00000229135	9606.ENSP00000263341	0	0	0	0	0.273	0	0	0.997	0.998
IGF1	TGFB1	9606.ENSP00000376637	9606.ENSP00000221930	0	0	0	0	0	0	0	0.976	0.976
IGF1	MET	9606.ENSP00000376637	9606.ENSP00000317272	0	0	0	0	0	0.063	0.65	0.744	0.908
IGF1	IL6	9606.ENSP00000376637	9606.ENSP00000385675	0	0	0	0	0	0	0	0.913	0.913
IGF1	IGF1R	9606.ENSP00000376637	9606.ENSP00000497069	0	0	0	0	0	0.983	0.9	0.999	0.999
IGF1R	PIK3CA	9606.ENSP00000497069	9606.ENSP00000263967	0	0	0	0	0.048	0.098	0.9	0.776	0.978
IGF1R	STAT3	9606.ENSP00000497069	9606.ENSP00000264657	0	0	0	0	0.064	0.62	0	0.797	0.921
IGF1R	PIK3R1	9606.ENSP00000497069	9606.ENSP00000428056	0	0	0	0	0.042	0.803	0.9	0.735	0.994
IGF1R	PTPN11	9606.ENSP00000497069	9606.ENSP00000489597	0	0	0	0	0.064	0.697	0	0.791	0.935
IKBKB	NFKBIA	9606.ENSP00000430684	9606.ENSP00000216797	0	0	0	0	0.042	0.994	0.9	0.995	0.999
IKBKB	NFKB1	9606.ENSP00000430684	9606.ENSP00000226574	0	0	0	0	0.125	0.885	0.9	0.979	0.999
IKBKB	TP53	9606.ENSP00000430684	9606.ENSP00000269305	0	0	0	0	0.076	0.51	0.5	0.739	0.933
IKBKB	PTEN	9606.ENSP00000430684	9606.ENSP00000361021	0	0	0	0	0.057	0.092	0.9	0.514	0.952
IKBKB	TLR4	9606.ENSP00000430684	9606.ENSP00000363089	0	0	0	0	0.092	0.1	0.5	0.791	0.903
IKBKB	RELA	9606.ENSP00000430684	9606.ENSP00000384273	0	0	0	0	0.067	0.877	0.9	0.957	0.999
IKBKB	TNF	9606.ENSP00000430684	9606.ENSP00000398698	0	0	0	0	0.089	0.994	0.5	0.934	0.999
IKBKB	TRAF6	9606.ENSP00000430684	9606.ENSP00000433623	0	0	0	0	0.129	0.597	0.9	0.995	0.999
IL10	TIMP1	9606.ENSP00000412237	9606.ENSP00000218388	0	0	0	0	0.128	0	0.75	0.806	0.954
IL10	TGFB1	9606.ENSP00000412237	9606.ENSP00000221930	0	0	0	0	0	0	0.4	0.891	0.932
IL10	IL2	9606.ENSP00000412237	9606.ENSP00000226730	0	0	0	0	0.056	0	0	0.963	0.964
IL10	IL1B	9606.ENSP00000412237	9606.ENSP00000263341	0	0	0	0	0.409	0	0.4	0.978	0.991
IL10	STAT3	9606.ENSP00000412237	9606.ENSP00000264657	0	0	0	0	0.057	0.301	0.5	0.916	0.968
IL10	IL18	9606.ENSP00000412237	9606.ENSP00000280357	0	0	0	0	0.165	0	0.4	0.917	0.955
IL10	TLR4	9606.ENSP00000412237	9606.ENSP00000363089	0	0	0	0	0.068	0.079	0	0.939	0.943
IL10	IL6	9606.ENSP00000412237	9606.ENSP00000385675	0	0	0	0	0.13	0	0.8	0.988	0.997
IL10	TNF	9606.ENSP00000412237	9606.ENSP00000398698	0	0	0	0	0.234	0	0.4	0.984	0.992
IL18	NFKB1	9606.ENSP00000280357	9606.ENSP00000226574	0	0	0	0	0.053	0	0.9	0.799	0.979
IL18	IL1B	9606.ENSP00000280357	9606.ENSP00000263341	0	0	0	0	0.095	0.312	0.5	0.972	0.99
IL18	TLR4	9606.ENSP00000280357	9606.ENSP00000363089	0	0	0	0	0.068	0	0	0.905	0.908
IL18	RELA	9606.ENSP00000280357	9606.ENSP00000384273	0	0	0	0	0.047	0	0.9	0.418	0.939
IL18	NLRP3	9606.ENSP00000280357	9606.ENSP00000337383	0	0	0	0	0.062	0	0	0.945	0.946
IL18	JUN	9606.ENSP00000280357	9606.ENSP00000360266	0	0	0	0	0	0	0.9	0.547	0.952
IL18	TNF	9606.ENSP00000280357	9606.ENSP00000398698	0	0	0	0	0.049	0	0.4	0.937	0.961
IL18	IL6	9606.ENSP00000280357	9606.ENSP00000385675	0	0	0	0	0	0	0.4	0.953	0.97
IL1B	NFKBIA	9606.ENSP00000263341	9606.ENSP00000216797	0	0	0	0	0.283	0	0	0.927	0.945
IL1B	TGFB1	9606.ENSP00000263341	9606.ENSP00000221930	0	0	0	0	0.14	0	0	0.924	0.932
IL1B	NFKB1	9606.ENSP00000263341	9606.ENSP00000226574	0	0	0	0	0.2	0	0.9	0.959	0.996
IL1B	IL2	9606.ENSP00000263341	9606.ENSP00000226730	0	0	0	0	0.073	0	0	0.999	0.999
IL1B	STAT3	9606.ENSP00000263341	9606.ENSP00000264657	0	0	0	0	0.069	0	0.5	0.877	0.938
IL1B	MMP9	9606.ENSP00000263341	9606.ENSP00000361405	0	0	0	0	0.275	0.051	0	0.932	0.949
IL1B	PTGS2	9606.ENSP00000263341	9606.ENSP00000356438	0	0	0	0	0.656	0	0	0.928	0.974
IL1B	TRAF6	9606.ENSP00000263341	9606.ENSP00000433623	0	0	0	0	0.044	0.055	0.5	0.963	0.981
IL1B	TLR4	9606.ENSP00000263341	9606.ENSP00000363089	0	0	0	0	0.181	0	0	0.984	0.986
IL1B	JUN	9606.ENSP00000263341	9606.ENSP00000360266	0	0	0	0	0.166	0	0.9	0.857	0.987
IL1B	RELA	9606.ENSP00000263341	9606.ENSP00000384273	0	0	0	0	0.118	0	0.9	0.903	0.99
IL1B	IL6	9606.ENSP00000263341	9606.ENSP00000385675	0	0	0	0	0.515	0	0.4	0.989	0.996
IL1B	NLRP3	9606.ENSP00000263341	9606.ENSP00000337383	0	0	0	0	0.339	0.312	0.9	0.947	0.997
IL1B	TNF	9606.ENSP00000263341	9606.ENSP00000398698	0	0	0	0	0.616	0	0.4	0.993	0.998
IL2	TNF	9606.ENSP00000226730	9606.ENSP00000398698	0	0	0	0	0.072	0	0	0.955	0.957
IL2	IL6	9606.ENSP00000226730	9606.ENSP00000385675	0	0	0	0	0.055	0	0	0.999	0.999
IL6	MAPK1	9606.ENSP00000385675	9606.ENSP00000215832	0	0	0	0	0.055	0	0.4	0.897	0.936
IL6	NFKBIA	9606.ENSP00000385675	9606.ENSP00000216797	0	0	0	0	0.175	0	0	0.915	0.927
IL6	TIMP1	9606.ENSP00000385675	9606.ENSP00000218388	0	0	0	0	0.152	0	0.4	0.888	0.938
IL6	TGFB1	9606.ENSP00000385675	9606.ENSP00000221930	0	0	0	0	0.106	0	0.4	0.932	0.96
IL6	NFKB1	9606.ENSP00000385675	9606.ENSP00000226574	0	0	0	0	0.176	0	0.9	0.942	0.994
IL6	STAT3	9606.ENSP00000385675	9606.ENSP00000264657	0	0	0	0	0.102	0.095	0.5	0.965	0.984
IL6	VCAM1	9606.ENSP00000385675	9606.ENSP00000294728	0	0	0	0	0.171	0	0	0.909	0.921
IL6	STAT1	9606.ENSP00000385675	9606.ENSP00000354394	0	0	0	0	0.11	0.087	0.5	0.941	0.972
IL6	PTGS2	9606.ENSP00000385675	9606.ENSP00000356438	0	0	0	0	0.484	0	0	0.926	0.96
IL6	JUN	9606.ENSP00000385675	9606.ENSP00000360266	0	0	0	0	0.14	0	0.9	0.882	0.989
IL6	MMP9	9606.ENSP00000385675	9606.ENSP00000361405	0	0	0	0	0.106	0	0.4	0.93	0.959
IL6	TLR4	9606.ENSP00000385675	9606.ENSP00000363089	0	0	0	0	0.104	0	0	0.971	0.973
IL6	MAPK8	9606.ENSP00000385675	9606.ENSP00000378974	0	0	0	0	0	0	0	0.938	0.938
IL6	RELA	9606.ENSP00000385675	9606.ENSP00000384273	0	0	0	0	0.108	0.292	0.9	0.816	0.986
IL6	TNF	9606.ENSP00000385675	9606.ENSP00000398698	0	0	0	0	0.261	0	0.4	0.989	0.994
ITGAV	TGFB1	9606.ENSP00000261023	9606.ENSP00000221930	0	0	0	0	0.076	0.961	0.5	0.748	0.994
JUN	MAPK1	9606.ENSP00000360266	9606.ENSP00000215832	0	0	0	0	0	0.771	0.9	0.958	0.998
JUN	NFKBIA	9606.ENSP00000360266	9606.ENSP00000216797	0	0	0	0	0.235	0.292	0	0.844	0.908
JUN	NFKB1	9606.ENSP00000360266	9606.ENSP00000226574	0	0	0	0	0.093	0.292	0	0.992	0.994
JUN	MAPK14	9606.ENSP00000360266	9606.ENSP00000229795	0	0	0	0	0	0.328	0.9	0.891	0.992
JUN	NR3C1	9606.ENSP00000360266	9606.ENSP00000231509	0	0	0	0	0	0.522	0	0.922	0.961
JUN	JUND	9606.ENSP00000360266	9606.ENSP00000252818	0	0	0.054	0.924	0.163	0.86	0.9	0.983	0.999
JUN	STAT3	9606.ENSP00000360266	9606.ENSP00000264657	0	0	0	0	0.061	0.328	0	0.993	0.995
JUN	TP53	9606.ENSP00000360266	9606.ENSP00000269305	0	0	0	0	0	0.324	0.5	0.992	0.997
JUN	JUNB	9606.ENSP00000360266	9606.ENSP00000303315	0	0	0	0.897	0.543	0.639	0.9	0.983	0.999
JUN	SP1	9606.ENSP00000360266	9606.ENSP00000329357	0	0	0	0	0.102	0.794	0.9	0.826	0.996
JUN	STAT1	9606.ENSP00000360266	9606.ENSP00000354394	0	0	0	0	0.055	0.328	0	0.869	0.91
JUN	NFE2L2	9606.ENSP00000360266	9606.ENSP00000380252	0	0	0	0	0.049	0.629	0	0.791	0.92
JUN	RELA	9606.ENSP00000360266	9606.ENSP00000384273	0	0	0	0	0.087	0.271	0	0.98	0.986
JUN	TNF	9606.ENSP00000360266	9606.ENSP00000398698	0	0	0	0	0.151	0	0.9	0.881	0.989
JUN	MAPK8	9606.ENSP00000360266	9606.ENSP00000378974	0	0	0	0	0.049	0.997	0.9	0.978	0.999
JUNB	JUND	9606.ENSP00000303315	9606.ENSP00000252818	0	0	0.067	0.879	0.258	0.704	0.9	0.984	0.999
JUNB	MAPK8	9606.ENSP00000303315	9606.ENSP00000378974	0	0	0	0	0.055	0.568	0.9	0.436	0.973
JUND	MAPK8	9606.ENSP00000252818	9606.ENSP00000378974	0	0	0	0	0.049	0.701	0.9	0.847	0.995
KIT	PIK3CA	9606.ENSP00000288135	9606.ENSP00000263967	0	0	0	0	0.106	0.325	0.9	0.809	0.986
KIT	STAT3	9606.ENSP00000288135	9606.ENSP00000264657	0	0	0	0	0.055	0.079	0.9	0.602	0.96
KIT	PRKCA	9606.ENSP00000288135	9606.ENSP00000408695	0	0	0	0.553	0.056	0	0.9	0.147	0.912
KIT	PTPN11	9606.ENSP00000288135	9606.ENSP00000489597	0	0	0	0	0.14	0.596	0.9	0.754	0.99
KIT	PIK3R1	9606.ENSP00000288135	9606.ENSP00000428056	0	0	0	0	0.056	0.87	0.9	0.668	0.995
LCN2	MMP2	9606.ENSP00000362108	9606.ENSP00000219070	0	0	0	0	0.057	0.292	0.4	0.796	0.907
LCN2	MMP9	9606.ENSP00000362108	9606.ENSP00000361405	0	0	0	0	0.131	0.422	0.4	0.995	0.998
LGALS3	TLR4	9606.ENSP00000254301	9606.ENSP00000363089	0	0	0	0	0.121	0	0	0.932	0.938
MAP2K1	MAPK1	9606.ENSP00000302486	9606.ENSP00000215832	0	0	0	0.595	0.152	0.929	0.9	0.95	0.999
MAP2K1	MAPK14	9606.ENSP00000302486	9606.ENSP00000229795	0	0	0	0.629	0.094	0.322	0.9	0.579	0.97
MAP2K1	PTPN11	9606.ENSP00000302486	9606.ENSP00000489597	0	0	0	0	0.074	0.321	0.4	0.832	0.928
MAP2K1	MAPK8	9606.ENSP00000302486	9606.ENSP00000378974	0	0	0	0.591	0.067	0	0.9	0.353	0.934
MAP2K1	RAF1	9606.ENSP00000302486	9606.ENSP00000401888	0	0	0	0.577	0.131	0.974	0.9	0.97	0.999
MAPK1	PRKCA	9606.ENSP00000215832	9606.ENSP00000408695	0	0	0	0.594	0.127	0.102	0.9	0.233	0.931
MAPK1	STAT1	9606.ENSP00000215832	9606.ENSP00000354394	0	0	0	0	0.09	0.091	0.9	0.471	0.95
MAPK1	MAPT	9606.ENSP00000215832	9606.ENSP00000340820	0	0	0	0	0.055	0.314	0.9	0.348	0.952
MAPK1	PTPN11	9606.ENSP00000215832	9606.ENSP00000489597	0	0	0	0	0.079	0.145	0.9	0.5	0.955
MAPK1	SP1	9606.ENSP00000215832	9606.ENSP00000329357	0	0	0	0	0.179	0.539	0.9	0.286	0.969
MAPK1	RAF1	9606.ENSP00000215832	9606.ENSP00000401888	0	0	0	0.588	0.115	0.8	0.7	0.593	0.975
MAPK1	MAPK14	9606.ENSP00000215832	9606.ENSP00000229795	0	0	0.067	0.924	0.342	0.816	0.9	0.677	0.995
MAPK1	STAT3	9606.ENSP00000215832	9606.ENSP00000264657	0	0	0	0	0.06	0.926	0	0.95	0.996
MAPK1	TP53	9606.ENSP00000215832	9606.ENSP00000269305	0	0	0	0	0.045	0.806	0.9	0.912	0.998
MAPK14	PGR	9606.ENSP00000229795	9606.ENSP00000325120	0	0	0	0	0.055	0	0.9	0.221	0.92
MAPK14	SP1	9606.ENSP00000229795	9606.ENSP00000329357	0	0	0	0	0.143	0.334	0.9	0.207	0.948
MAPK14	MAPK8	9606.ENSP00000229795	9606.ENSP00000378974	0	0	0.061	0.922	0.11	0.292	0.9	0.366	0.955
MAPK14	TP53	9606.ENSP00000229795	9606.ENSP00000269305	0	0	0	0	0.046	0.818	0.9	0.744	0.994
MAPK8	NFKB1	9606.ENSP00000378974	9606.ENSP00000226574	0	0	0	0	0.067	0.072	0.9	0.869	0.987
MAPK8	STAT3	9606.ENSP00000378974	9606.ENSP00000264657	0	0	0	0	0.044	0.625	0	0.745	0.9
MAPK8	TP53	9606.ENSP00000378974	9606.ENSP00000269305	0	0	0	0	0.086	0.845	0.9	0.861	0.997
MAPK8	PGR	9606.ENSP00000378974	9606.ENSP00000325120	0	0	0	0	0	0	0.9	0.248	0.921
MAPK8	SP1	9606.ENSP00000378974	9606.ENSP00000329357	0	0	0	0	0.06	0.517	0.9	0.272	0.962
MAPK8	TRAF6	9606.ENSP00000378974	9606.ENSP00000433623	0	0	0	0	0.08	0.062	0.9	0.715	0.972
MAPK8	RELA	9606.ENSP00000378974	9606.ENSP00000384273	0	0	0	0	0.054	0.045	0.9	0.758	0.975
MET	PIK3CA	9606.ENSP00000317272	9606.ENSP00000263967	0	0	0	0	0.042	0.069	0.9	0.617	0.961
MET	STAT3	9606.ENSP00000317272	9606.ENSP00000264657	0	0	0	0	0.063	0.332	0.5	0.948	0.981
MET	PTPN11	9606.ENSP00000317272	9606.ENSP00000489597	0	0	0	0	0.049	0.407	0.4	0.81	0.927
MMP1	TIMP1	9606.ENSP00000322788	9606.ENSP00000218388	0	0	0	0	0.123	0.935	0.4	0.984	0.999
MMP1	MMP2	9606.ENSP00000322788	9606.ENSP00000219070	0	0	0	0.864	0.181	0	0.9	0.215	0.93
MMP1	TIMP2	9606.ENSP00000322788	9606.ENSP00000262768	0	0	0	0	0.095	0.186	0	0.921	0.936
MMP1	MMP3	9606.ENSP00000322788	9606.ENSP00000299855	0	0	0.064	0.951	0.657	0	0.9	0.597	0.985
MMP1	MMP9	9606.ENSP00000322788	9606.ENSP00000361405	0	0	0	0.743	0.154	0	0.9	0.725	0.974
MMP12	TIMP1	9606.ENSP00000458585	9606.ENSP00000218388	0	0	0	0	0.104	0.16	0	0.907	0.923
MMP13	TIMP2	9606.ENSP00000260302	9606.ENSP00000262768	0	0	0	0	0.063	0.797	0	0.821	0.963
MMP14	TIMP1	9606.ENSP00000308208	9606.ENSP00000218388	0	0	0	0	0.172	0.977	0	0.996	0.999
MMP14	MMP2	9606.ENSP00000308208	9606.ENSP00000219070	0	0	0.084	0.758	0.381	0	0.9	0.961	0.997
MMP14	TIMP2	9606.ENSP00000308208	9606.ENSP00000262768	0	0	0	0	0.123	0.842	0.9	0.999	0.999
MMP2	TIMP1	9606.ENSP00000219070	9606.ENSP00000218388	0	0	0	0	0.148	0.16	0.4	0.994	0.997
MMP2	STAT3	9606.ENSP00000219070	9606.ENSP00000264657	0	0	0	0	0.074	0.226	0.5	0.793	0.916
MMP2	MMP9	9606.ENSP00000219070	9606.ENSP00000361405	0	0	0.061	0.927	0.128	0	0.9	0.116	0.918
MMP2	MMP7	9606.ENSP00000219070	9606.ENSP00000260227	0	0	0	0.878	0.128	0	0.8	0.798	0.961
MMP2	TGFB1	9606.ENSP00000219070	9606.ENSP00000221930	0	0	0	0	0.07	0.6	0.4	0.85	0.962
MMP2	TIMP2	9606.ENSP00000219070	9606.ENSP00000262768	0	0	0	0	0.154	0.985	0.5	0.999	0.999
MMP3	TIMP1	9606.ENSP00000299855	9606.ENSP00000218388	0	0	0	0	0.115	0.952	0.4	0.998	0.999
MMP3	TIMP2	9606.ENSP00000299855	9606.ENSP00000262768	0	0	0	0	0.088	0.186	0	0.959	0.967
MMP3	MMP9	9606.ENSP00000299855	9606.ENSP00000361405	0	0	0.075	0.784	0.145	0	0.9	0.514	0.956
MMP7	TIMP1	9606.ENSP00000260227	9606.ENSP00000218388	0	0	0	0	0.075	0.16	0	0.911	0.925
MMP7	TIMP2	9606.ENSP00000260227	9606.ENSP00000262768	0	0	0	0	0.055	0.307	0	0.931	0.951
MMP9	TIMP1	9606.ENSP00000361405	9606.ENSP00000218388	0	0	0	0	0.075	0.572	0.9	0.999	0.999
MMP9	TGFB1	9606.ENSP00000361405	9606.ENSP00000221930	0	0	0	0	0.082	0.599	0.4	0.872	0.968
MMP9	MPO	9606.ENSP00000361405	9606.ENSP00000225275	0	0	0	0	0.085	0	0	0.967	0.969
MMP9	TIMP2	9606.ENSP00000361405	9606.ENSP00000262768	0	0	0	0	0.133	0.303	0	0.997	0.998
MMP9	TNF	9606.ENSP00000361405	9606.ENSP00000398698	0	0	0	0	0.207	0	0	0.915	0.93
MMP9	TLR4	9606.ENSP00000361405	9606.ENSP00000363089	0	0	0	0	0.18	0	0	0.923	0.934
MTOR	PIK3CA	9606.ENSP00000354558	9606.ENSP00000263967	0	0	0	0.548	0.06	0.166	0.9	0.592	0.963
MTOR	STAT3	9606.ENSP00000354558	9606.ENSP00000264657	0	0	0	0	0.049	0.735	0	0.73	0.926
MTOR	PPARG	9606.ENSP00000354558	9606.ENSP00000287820	0	0	0	0	0	0	0.9	0.655	0.964
MTOR	PTEN	9606.ENSP00000354558	9606.ENSP00000361021	0	0	0	0	0	0.281	0	0.922	0.942
MTOR	PIK3R1	9606.ENSP00000354558	9606.ENSP00000428056	0	0	0	0	0.044	0	0.9	0.577	0.956
MTOR	PRKCA	9606.ENSP00000354558	9606.ENSP00000408695	0	0	0	0	0.049	0.292	0.9	0.602	0.969
NFKB1	NFKBIA	9606.ENSP00000226574	9606.ENSP00000216797	0	0	0	0.755	0.242	0.997	0.9	0.986	0.999
NFKB1	SP1	9606.ENSP00000226574	9606.ENSP00000329357	0	0	0	0	0.067	0.748	0	0.648	0.91
NFKB1	STAT1	9606.ENSP00000226574	9606.ENSP00000354394	0	0	0	0	0.129	0.045	0	0.918	0.926
NFKB1	RAF1	9606.ENSP00000226574	9606.ENSP00000401888	0	0	0	0	0.072	0.095	0.9	0.37	0.94
NFKB1	TRAF6	9606.ENSP00000226574	9606.ENSP00000433623	0	0	0	0	0.088	0.045	0.5	0.902	0.951
NFKB1	STAT3	9606.ENSP00000226574	9606.ENSP00000264657	0	0	0	0	0.126	0.598	0	0.902	0.962
NFKB1	PPARG	9606.ENSP00000226574	9606.ENSP00000287820	0	0	0	0	0.087	0.292	0.75	0.851	0.972
NFKB1	NLRP3	9606.ENSP00000226574	9606.ENSP00000337383	0	0	0	0	0.099	0.093	0.9	0.796	0.981
NFKB1	TP53	9606.ENSP00000226574	9606.ENSP00000269305	0	0	0	0	0.098	0.045	0	0.989	0.989
NFKB1	TLR4	9606.ENSP00000226574	9606.ENSP00000363089	0	0	0	0	0.116	0.093	0.9	0.932	0.993
NFKB1	TNF	9606.ENSP00000226574	9606.ENSP00000398698	0	0	0	0	0.194	0	0.9	0.995	0.999
NFKB1	RELA	9606.ENSP00000226574	9606.ENSP00000384273	0	0	0	0.769	0.182	0.999	0.9	0.986	0.999
NFKBIA	TP53	9606.ENSP00000216797	9606.ENSP00000269305	0	0	0	0	0.051	0.623	0	0.781	0.915
NFKBIA	STAT1	9606.ENSP00000216797	9606.ENSP00000354394	0	0	0	0	0.115	0.294	0	0.877	0.917
NFKBIA	TRAF6	9606.ENSP00000216797	9606.ENSP00000433623	0	0	0	0	0.063	0.045	0.5	0.933	0.966
NFKBIA	TNF	9606.ENSP00000216797	9606.ENSP00000398698	0	0	0	0	0.338	0.292	0	0.937	0.967
NFKBIA	RELA	9606.ENSP00000216797	9606.ENSP00000384273	0	0.003	0	0	0.147	0.999	0.9	0.999	0.999
NLRP3	RELA	9606.ENSP00000337383	9606.ENSP00000384273	0	0	0	0	0.049	0.099	0.9	0.353	0.937
NOS2	OTC	9606.ENSP00000327251	9606.ENSP00000039007	0	0	0	0	0.067	0	0.9	0.232	0.922
NOS2	NOS3	9606.ENSP00000327251	9606.ENSP00000297494	0	0	0.069	0.942	0	0.087	0.9	0.09	0.912
NOS2	PTGS2	9606.ENSP00000327251	9606.ENSP00000356438	0	0	0	0	0	0.095	0	0.902	0.908
NOS3	OTC	9606.ENSP00000297494	9606.ENSP00000039007	0	0	0	0	0	0	0.9	0.266	0.923
NR3C1	TP53	9606.ENSP00000231509	9606.ENSP00000269305	0	0	0	0	0	0.51	0	0.875	0.936
NR3C1	STAT3	9606.ENSP00000231509	9606.ENSP00000264657	0	0	0	0	0.062	0.736	0	0.932	0.981
PARP1	TP53	9606.ENSP00000355759	9606.ENSP00000269305	0	0	0	0	0.067	0.794	0	0.87	0.972
PECAM1	SELP	9606.ENSP00000457421	9606.ENSP00000263686	0	0	0	0	0.192	0.091	0.4	0.816	0.908
PECAM1	PTPN11	9606.ENSP00000457421	9606.ENSP00000489597	0	0	0	0	0.084	0.837	0.9	0.973	0.999
PGR	PIK3CA	9606.ENSP00000325120	9606.ENSP00000263967	0	0	0	0	0.06	0	0.9	0.626	0.961
PGR	PIK3R1	9606.ENSP00000325120	9606.ENSP00000428056	0	0	0	0	0	0.065	0.9	0.322	0.931
PIK3CA	THRA	9606.ENSP00000263967	9606.ENSP00000264637	0	0	0	0	0.049	0	0.9	0.052	0.901
PIK3CA	TLR4	9606.ENSP00000263967	9606.ENSP00000363089	0	0	0	0	0.08	0.086	0.9	0.246	0.928
PIK3CA	SYK	9606.ENSP00000263967	9606.ENSP00000364898	0	0	0	0	0	0.069	0.9	0.364	0.935
PIK3CA	TP53	9606.ENSP00000263967	9606.ENSP00000269305	0	0	0	0	0	0.292	0	0.92	0.941
PIK3CA	RAF1	9606.ENSP00000263967	9606.ENSP00000401888	0	0	0	0	0.066	0.069	0.9	0.719	0.972
PIK3CA	PTPN11	9606.ENSP00000263967	9606.ENSP00000489597	0	0	0	0	0.118	0.661	0.9	0.725	0.99
PIK3CA	PTEN	9606.ENSP00000263967	9606.ENSP00000361021	0	0	0	0	0.112	0.134	0.9	0.949	0.995
PIK3CA	PIK3CG	9606.ENSP00000263967	9606.ENSP00000419260	0	0	0	0.808	0.078	0.045	0.9	0.973	0.997
PIK3CA	PIK3R1	9606.ENSP00000263967	9606.ENSP00000428056	0	0	0	0	0.156	0.997	0.967	0.998	0.999
PIK3CG	PIK3R1	9606.ENSP00000419260	9606.ENSP00000428056	0	0	0	0	0.055	0.492	0.914	0.987	0.999
PIK3R1	THRA	9606.ENSP00000428056	9606.ENSP00000264637	0	0	0	0	0.085	0.331	0.9	0.376	0.956
PIK3R1	STAT3	9606.ENSP00000428056	9606.ENSP00000264657	0	0	0	0	0.05	0.421	0.5	0.74	0.918
PIK3R1	PTEN	9606.ENSP00000428056	9606.ENSP00000361021	0	0	0	0	0.056	0.554	0.9	0.943	0.997
PIK3R1	TLR4	9606.ENSP00000428056	9606.ENSP00000363089	0	0	0	0	0.062	0	0.9	0.271	0.925
PIK3R1	SYK	9606.ENSP00000428056	9606.ENSP00000364898	0	0	0	0	0.05	0.536	0.9	0.605	0.98
PIK3R1	RAF1	9606.ENSP00000428056	9606.ENSP00000401888	0	0	0	0	0.042	0.263	0.9	0.303	0.944
PIK3R1	PTPN11	9606.ENSP00000428056	9606.ENSP00000489597	0	0	0	0	0.048	0.88	0.9	0.691	0.996
PLA2G2A	PTGS2	9606.ENSP00000383364	9606.ENSP00000356438	0	0	0	0	0	0	0.65	0.792	0.924
PPARG	TGFB1	9606.ENSP00000287820	9606.ENSP00000221930	0	0	0	0	0.105	0	0.75	0.68	0.922
PPARG	TP53	9606.ENSP00000287820	9606.ENSP00000269305	0	0	0	0	0	0.305	0.5	0.866	0.949
PPARG	SP1	9606.ENSP00000287820	9606.ENSP00000329357	0	0	0	0	0	0.788	0	0.62	0.916
PPARG	SREBF2	9606.ENSP00000287820	9606.ENSP00000354476	0	0	0	0	0	0	0.75	0.772	0.94
PPARG	RELA	9606.ENSP00000287820	9606.ENSP00000384273	0	0	0	0	0.087	0.834	0.75	0.976	0.998
PRKCA	RAF1	9606.ENSP00000408695	9606.ENSP00000401888	0	0	0	0.58	0.042	0.05	0.9	0.199	0.917
PTEN	TP53	9606.ENSP00000361021	9606.ENSP00000269305	0	0	0	0	0.067	0.748	0.9	0.968	0.999
PTGS1	PTGS2	9606.ENSP00000354612	9606.ENSP00000356438	0	0	0.057	0.966	0.157	0.292	0.9	0.192	0.946
PTGS2	STAT3	9606.ENSP00000356438	9606.ENSP00000264657	0	0	0	0	0.061	0	0.75	0.726	0.93
PTGS2	TP53	9606.ENSP00000356438	9606.ENSP00000269305	0	0	0	0	0	0.82	0	0.866	0.974
PTGS2	TNF	9606.ENSP00000356438	9606.ENSP00000398698	0	0	0	0	0.185	0	0	0.901	0.916
PTPN11	STAT3	9606.ENSP00000489597	9606.ENSP00000264657	0	0	0	0	0.087	0.526	0.5	0.935	0.984
PTPN11	STAT1	9606.ENSP00000489597	9606.ENSP00000354394	0	0	0	0	0.076	0.439	0.5	0.868	0.961
PTPN11	SYK	9606.ENSP00000489597	9606.ENSP00000364898	0	0	0	0.555	0.067	0.097	0.9	0.616	0.963
PTPN11	TRAF6	9606.ENSP00000489597	9606.ENSP00000433623	0	0	0	0	0.082	0.301	0.9	0.298	0.948
RAF1	RELA	9606.ENSP00000401888	9606.ENSP00000384273	0	0	0	0	0.101	0.098	0.9	0.186	0.925
RELA	STAT3	9606.ENSP00000384273	9606.ENSP00000264657	0	0	0	0	0.171	0.793	0	0.959	0.992
RELA	TP53	9606.ENSP00000384273	9606.ENSP00000269305	0	0	0	0	0.126	0.45	0	0.914	0.955
RELA	SP1	9606.ENSP00000384273	9606.ENSP00000329357	0	0	0	0	0.06	0.876	0	0.631	0.953
RELA	TLR4	9606.ENSP00000384273	9606.ENSP00000363089	0	0	0	0	0.068	0.125	0.9	0.639	0.966
RELA	TNF	9606.ENSP00000384273	9606.ENSP00000398698	0	0	0	0	0.118	0.516	0.9	0.944	0.997
SELP	VCAM1	9606.ENSP00000263686	9606.ENSP00000294728	0	0	0	0	0.064	0	0	0.963	0.963
SERPINA1	TTR	9606.ENSP00000416066	9606.ENSP00000237014	0	0	0	0	0.177	0.071	0	0.954	0.961
SOD1	SOD2	9606.ENSP00000270142	9606.ENSP00000446252	0	0	0	0	0.201	0.661	0.9	0.821	0.994
SP1	STAT3	9606.ENSP00000329357	9606.ENSP00000264657	0	0	0	0	0.074	0.739	0	0.706	0.923
SP1	TP53	9606.ENSP00000329357	9606.ENSP00000269305	0	0	0	0	0.065	0.923	0	0.928	0.994
SREBF2	TP53	9606.ENSP00000354476	9606.ENSP00000269305	0	0	0	0	0.108	0.363	0	0.965	0.978
STAT1	STAT3	9606.ENSP00000354394	9606.ENSP00000264657	0	0	0.064	0.947	0.192	0.874	0.9	0.982	0.999
STAT1	TRAF6	9606.ENSP00000354394	9606.ENSP00000433623	0	0	0	0	0.093	0	0	0.896	0.902
STAT3	TNF	9606.ENSP00000264657	9606.ENSP00000398698	0	0	0	0	0.07	0	0.5	0.881	0.939
STAT3	SYK	9606.ENSP00000264657	9606.ENSP00000364898	0	0	0	0	0.068	0.796	0.5	0.815	0.98
STAT3	TP53	9606.ENSP00000264657	9606.ENSP00000269305	0	0	0	0	0.063	0.164	0.8	0.97	0.994
SYK	TLR4	9606.ENSP00000364898	9606.ENSP00000363089	0	0	0	0	0.193	0.392	0	0.946	0.971
SYK	TRAF6	9606.ENSP00000364898	9606.ENSP00000433623	0	0	0	0	0.108	0.672	0	0.8	0.936
TGFB1	TNF	9606.ENSP00000221930	9606.ENSP00000398698	0	0	0	0	0.125	0	0	0.935	0.941
TGFB1	TGFBR1	9606.ENSP00000221930	9606.ENSP00000447297	0	0	0	0	0.042	0.979	0.9	0.999	0.999
TGFB1	TGFBR2	9606.ENSP00000221930	9606.ENSP00000351905	0	0	0	0	0.105	0.986	0.9	0.999	0.999
TGFBR1	TGFBR2	9606.ENSP00000447297	9606.ENSP00000351905	0	0	0	0.781	0.132	0.986	0.9	0.986	0.999
TGFBR1	TRAF6	9606.ENSP00000447297	9606.ENSP00000433623	0	0	0	0	0.11	0.795	0	0.964	0.993
TLR4	TNF	9606.ENSP00000363089	9606.ENSP00000398698	0	0	0	0	0.125	0	0	0.966	0.969
TLR4	TRAF6	9606.ENSP00000363089	9606.ENSP00000433623	0	0	0	0	0.117	0.923	0.9	0.997	0.999
TNF	VCAM1	9606.ENSP00000398698	9606.ENSP00000294728	0	0	0	0	0.1	0	0	0.918	0.923
TNF	TRAF6	9606.ENSP00000398698	9606.ENSP00000433623	0	0	0	0	0.106	0.625	0	0.995	0.998
TP53	TRAF6	9606.ENSP00000269305	9606.ENSP00000433623	0	0	0	0	0.055	0.292	0	0.938	0.954

## Sheet: Supplementary Table 4-Centrali
Table S4. Centrality Analysis in PPI Network
AverageShortestPathLength	Betweenness unDir	BetweennessCentrality	Closeness unDir	ClosenessCentrality	ClusteringCoefficient	Degree	Degree unDir	Eccentricity	IsSingleNode	name	NeighborhoodConnectivity	NumberOfDirectedEdges	NumberOfUndirectedEdges	PartnerOfMultiEdgedNodePairs	Radiality	selected	SelfLoops	shared name	Stress	TopologicalCoefficient
3.09655	0	0	0.00222717	0.32294	0	1	1	5	FALSE	ADAM17	27	0	1	0	0.944828	FALSE	0	ADAM17	0	0
2.10345	1711.8	0.0819826	0.00327869	0.47541	0.282051	27	27	4	FALSE	TNF	14.963	0	27	0	0.970962	FALSE	0	TNF	10394	0.142152
3.24828	0	0	0.00212314	0.307856	0	1	1	5	FALSE	AHR	28	0	1	0	0.940835	FALSE	0	AHR	0	0
2.25517	862.601	0.0413123	0.0030581	0.443425	0.333333	28	28	4	FALSE	ESR1	17.3571	0	28	0	0.966969	FALSE	0	ESR1	5854	0.190345
2.07586	2056.55	0.0984937	0.00332226	0.481728	0.212121	34	34	4	FALSE	AKT1	15.2059	0	34	0	0.971688	FALSE	0	AKT1	11830	0.143174
2.18621	685.867	0.032848	0.00315457	0.457413	0.324111	23	23	4	FALSE	MAPK1	17.3913	0	23	0	0.968784	FALSE	0	MAPK1	4304	0.179292
2.41379	57.4204	0.00275002	0.00285714	0.414286	0.564103	13	13	4	FALSE	CCND1	21.9231	0	13	0	0.962795	FALSE	0	CCND1	540	0.254919
2.58621	55.2347	0.00264534	0.00266667	0.386667	0.551282	13	13	5	FALSE	MAPK14	19.4615	0	13	0	0.958258	FALSE	0	MAPK14	500	0.274106
2.33793	564.532	0.027037	0.00294985	0.427729	0.246753	22	22	4	FALSE	PIK3CA	14.0909	0	22	0	0.964791	FALSE	0	PIK3CA	3916	0.165775
2.53793	432.551	0.0207161	0.00271739	0.394022	0.266667	10	10	4	FALSE	FGF2	14.1	0	10	0	0.959528	FALSE	0	FGF2	2764	0.195833
1.92414	3246.22	0.15547	0.00358423	0.519713	0.229018	38	38	3	FALSE	STAT3	16.4737	0	38	0	0.975681	FALSE	0	STAT3	17558	0.140576
2.46897	365.643	0.0175117	0.0027933	0.405028	0.352381	15	15	4	FALSE	EGF	14.1333	0	15	0	0.961343	FALSE	0	EGF	2962	0.190991
2.09655	2142.52	0.102611	0.00328947	0.476974	0.237237	37	37	4	FALSE	TP53	15.1081	0	37	0	0.971143	FALSE	0	TP53	11812	0.142529
2.95862	130.25	0.00623803	0.002331	0.337995	0.5	4	4	5	FALSE	NOS3	12.75	0	4	0	0.948457	FALSE	0	NOS3	790	0.303571
2.31724	887.848	0.0425215	0.00297619	0.431548	0.209524	15	15	4	FALSE	CASP3	14.8667	0	15	0	0.965336	FALSE	0	CASP3	3318	0.160145
3.03448	31.7876	0.00152239	0.00227273	0.329545	0	2	2	5	FALSE	HSPA5	19	0	2	0	0.946461	FALSE	0	HSPA5	248	0.514286
2.53103	164.998	0.00790221	0.0027248	0.395095	0.333333	13	13	5	FALSE	GSK3B	16.4615	0	13	0	0.95971	FALSE	0	GSK3B	1004	0.215587
2.90345	183.231	0.00877544	0.0023753	0.344418	0.333333	4	4	5	FALSE	NOS2	12.5	0	4	0	0.949909	FALSE	0	NOS2	1074	0.29878
2.54483	470.933	0.0225543	0.00271003	0.392954	0.236364	11	11	4	FALSE	CAV1	15.6364	0	11	0	0.959347	FALSE	0	CAV1	2406	0.216389
2.48276	213.186	0.0102101	0.00277778	0.402778	0.484848	12	12	4	FALSE	FOXO3	19.9167	0	12	0	0.96098	FALSE	0	FOXO3	1792	0.25211
2.33103	114.221	0.00547035	0.00295858	0.428994	0.448718	13	13	4	FALSE	STAT1	22.1538	0	13	0	0.964973	FALSE	0	STAT1	1214	0.251748
2.5931	45.5976	0.00218379	0.00265957	0.385638	0.380952	7	7	4	FALSE	MTOR	20.5714	0	7	0	0.958076	FALSE	0	MTOR	298	0.312088
2.11034	1325.3	0.0634722	0.00326797	0.473856	0.312644	30	30	4	FALSE	JUN	16.8333	0	30	0	0.97078	FALSE	0	JUN	8648	0.166667
2.53793	81.8758	0.00392125	0.00271739	0.394022	0.424242	12	12	5	FALSE	PTEN	18.75	0	12	0	0.959528	FALSE	0	PTEN	634	0.243506
2.45517	279.121	0.0133679	0.00280899	0.407303	0.384615	14	14	4	FALSE	FOXO1	18.2143	0	14	0	0.961706	FALSE	0	FOXO1	2302	0.230561
2.4	123.443	0.00591202	0.00287356	0.416667	0.422222	10	10	4	FALSE	IGF1	19	0	10	0	0.963158	FALSE	0	IGF1	1032	0.234568
2.82069	171.811	0.00822848	0.00244499	0.354523	0.5	4	4	5	FALSE	NFE2L2	19.75	0	4	0	0.952087	FALSE	0	NFE2L2	980	0.367925
2.33103	1476.69	0.0707228	0.00295858	0.428994	0.226316	20	20	4	FALSE	BCL2	14.05	0	20	0	0.964973	FALSE	0	BCL2	7590	0.15977
2.6069	6.44119	0.000308	0.0026455	0.383598	0.733333	6	6	4	FALSE	CDKN1A	24.8333	0	6	0	0.957713	FALSE	0	CDKN1A	58	0.365196
2.24138	581.733	0.0278608	0.00307692	0.446154	0.389706	17	17	4	FALSE	CREB1	19.5294	0	17	0	0.967332	FALSE	0	CREB1	3486	0.207134
2.69655	70.0427	0.00335454	0.00255755	0.370844	0.311111	10	10	5	FALSE	RAF1	17.9	0	10	0	0.955354	FALSE	0	RAF1	658	0.275385
2.94483	0	0	0.00234192	0.339578	1	3	3	5	FALSE	PIK3CG	25.6667	0	3	0	0.94882	FALSE	0	PIK3CG	0	0.534722
2.36552	687.539	0.0329281	0.00291545	0.422741	0.266667	21	21	4	FALSE	PIK3R1	13.8095	0	21	0	0.964065	FALSE	0	PIK3R1	5098	0.170488
2.47586	70.5202	0.0033774	0.00278552	0.4039	0.490909	11	11	4	FALSE	IKBKB	20.3636	0	11	0	0.961162	FALSE	0	IKBKB	874	0.271515
2.37241	250.24	0.0119847	0.00290698	0.421512	0.304762	15	15	4	FALSE	TRAF6	17.6667	0	15	0	0.963884	FALSE	0	TRAF6	1896	0.204651
2.37931	35.9821	0.00172328	0.00289855	0.42029	0.651515	12	12	4	FALSE	HIF1A	25.4167	0	12	0	0.963702	FALSE	0	HIF1A	430	0.282407
2.33103	915.676	0.0438542	0.00295858	0.428994	0.253333	25	25	5	FALSE	CTNNB1	15.36	0	25	0	0.964973	FALSE	0	CTNNB1	5012	0.166957
2.97241	1331.78	0.0637824	0.00232019	0.336427	0.0666667	6	6	5	FALSE	ALB	5.83333	0	6	0	0.948094	FALSE	0	ALB	4732	0.178161
3.93793	0	0	0.00175131	0.25394	1	2	2	6	FALSE	TTR	4.5	0	2	0	0.922686	FALSE	0	TTR	0	0.642857
2.05517	3158.07	0.151249	0.00335571	0.486577	0.2849	27	27	4	FALSE	IL6	16	0	27	0	0.972232	FALSE	0	IL6	16948	0.142526
3.96552	0	0	0.00173913	0.252174	0	1	1	6	FALSE	GC	6	0	1	0	0.92196	FALSE	0	GC	0	0
3.96552	0	0	0.00173913	0.252174	0	1	1	6	FALSE	F2	6	0	1	0	0.92196	FALSE	0	F2	0	0
3.96552	0	0	0.00173913	0.252174	0	1	1	6	FALSE	SHBG	6	0	1	0	0.92196	FALSE	0	SHBG	0	0
3.8	32.27	0.0015455	0.00181488	0.263158	0.333333	3	3	6	FALSE	SERPINA1	4	0	3	0	0.926316	FALSE	0	SERPINA1	64	0.407407
3.3931	0	0	0.00203252	0.294715	1	3	3	5	FALSE	ALOX5	5.66667	0	3	0	0.937024	FALSE	0	ALOX5	0	0.515152
3.31724	23.0303	0.00110298	0.002079	0.301455	0.5	4	4	5	FALSE	CYP2C9	5	0	4	0	0.93902	FALSE	0	CYP2C9	76	0.365385
3.3931	0	0	0.00203252	0.294715	1	3	3	5	FALSE	PTGS1	5.66667	0	3	0	0.937024	FALSE	0	PTGS1	0	0.515152
2.42759	1220.86	0.0584705	0.00284091	0.411932	0.222222	10	10	4	FALSE	PTGS2	16.6	0	10	0	0.962432	FALSE	0	PTGS2	4720	0.218667
3.31034	0	0	0.00208333	0.302083	0	1	1	5	FALSE	ANXA5	15	0	1	0	0.939201	FALSE	0	ANXA5	0	0
2.64828	2.52941	0.000121	0.00260417	0.377604	0.8	6	6	4	FALSE	AR	25.8333	0	6	0	0.956624	FALSE	0	AR	50	0.410053
3.0069	0	0	0.00229358	0.332569	1	3	3	5	FALSE	BAX	20	0	3	0	0.947187	FALSE	0	BAX	0	0.465116
3.0069	0	0	0.00229358	0.332569	1	3	3	5	FALSE	BBC3	20	0	3	0	0.947187	FALSE	0	BBC3	0	0.465116
3.25517	0	0	0.00211864	0.307203	1	3	3	5	FALSE	CTSD	10	0	3	0	0.940653	FALSE	0	CTSD	0	0.434783
2.75172	17.9371	0.000859	0.00250627	0.363409	0	3	3	4	FALSE	LGALS3	20.6667	0	3	0	0.953902	FALSE	0	LGALS3	148	0.378205
3.26897	156.036	0.00747297	0.0021097	0.305907	0.166667	4	4	5	FALSE	SOD1	7	0	4	0	0.94029	FALSE	0	SOD1	966	0.282609
3.32414	0	0	0.00207469	0.30083	0	1	1	5	FALSE	CTSK	20	0	1	0	0.938838	FALSE	0	CTSK	0	0
3.13103	30.9526	0.0014824	0.00220264	0.319383	0.4	5	5	5	FALSE	CTSB	8.4	0	5	0	0.94392	FALSE	0	CTSB	166	0.289655
2.56552	115.398	0.00552675	0.00268817	0.389785	0.388889	9	9	5	FALSE	CASP8	17	0	9	0	0.958802	FALSE	0	CASP8	938	0.246377
2.88966	26.3667	0.00126277	0.00238663	0.346062	0.666667	4	4	5	FALSE	PARP1	19.25	0	4	0	0.950272	FALSE	0	PARP1	90	0.377451
2.97241	164.382	0.00787272	0.00232019	0.336427	0.4	5	5	5	FALSE	CTSS	9.8	0	5	0	0.948094	FALSE	0	CTSS	826	0.282353
2.22069	782.626	0.0374821	0.00310559	0.450311	0.294372	22	22	4	FALSE	MAPK8	16.6364	0	22	0	0.967877	FALSE	0	MAPK8	5068	0.176983
3.08276	1.36667	6.55e-05	0.00223714	0.324385	0	2	2	5	FALSE	BDNF	15	0	2	0	0.945191	FALSE	0	BDNF	6	0.538462
2.48966	136.695	0.00654668	0.00277008	0.401662	0.474359	13	13	4	FALSE	IGF1R	17.9231	0	13	0	0.960799	FALSE	0	IGF1R	844	0.247863
2.86897	11.6814	0.000559	0.00240385	0.348558	0.47619	7	7	5	FALSE	BRAF	13.5714	0	7	0	0.950817	FALSE	0	BRAF	96	0.276968
2.88966	15.6817	0.000751	0.00238663	0.346062	0.380952	7	7	5	FALSE	MAP2K1	14.7143	0	7	0	0.950272	FALSE	0	MAP2K1	92	0.319876
2.77931	51.5804	0.00247032	0.00248139	0.359801	0.214286	8	8	5	FALSE	PRKCA	13.75	0	8	0	0.953176	FALSE	0	PRKCA	246	0.241071
2.86207	65.5887	0.00314122	0.00240964	0.349398	0.571429	7	7	4	FALSE	CASP1	14.2857	0	7	0	0.950998	FALSE	0	CASP1	442	0.37594
2.2069	644.986	0.0308901	0.003125	0.453125	0.38961	22	22	4	FALSE	IL1B	15.8636	0	22	0	0.96824	FALSE	0	IL1B	5326	0.165246
2.55172	43.2394	0.00207085	0.0027027	0.391892	0.672727	11	11	4	FALSE	IL18	19.0909	0	11	0	0.959165	FALSE	0	IL18	450	0.307918
2.86207	43.5576	0.00208609	0.00240964	0.349398	0.52381	7	7	5	FALSE	NLRP3	14	0	7	0	0.950998	FALSE	0	NLRP3	346	0.35
2.30345	770.489	0.0369008	0.00299401	0.434132	0.309942	19	19	4	FALSE	TLR4	15.3158	0	19	0	0.965699	FALSE	0	TLR4	5052	0.178947
3.31034	0	0	0.00208333	0.302083	0	1	1	5	FALSE	VIM	15	0	1	0	0.939201	FALSE	0	VIM	0	0
2.89655	0	0	0.00238095	0.345238	1	3	3	5	FALSE	FAS	17	0	3	0	0.950091	FALSE	0	FAS	0	0.435897
3.02069	1.97222	9.45e-05	0.00228311	0.33105	0.333333	3	3	5	FALSE	MAPT	17	0	3	0	0.946824	FALSE	0	MAPT	10	0.462963
4.12414	0	0	0.00167224	0.242475	1	2	2	6	FALSE	CAT	4	0	2	0	0.917786	FALSE	0	CAT	0	0.666667
3.31034	167.903	0.00804131	0.00208333	0.302083	0.333333	4	4	5	FALSE	SOD2	8	0	4	0	0.939201	FALSE	0	SOD2	1374	0.380952
2.21379	797.234	0.0381817	0.00311526	0.451713	0.288538	23	23	4	FALSE	EGFR	16.4348	0	23	0	0.968058	FALSE	0	EGFR	5248	0.176251
2.94483	52.724	0.0025251	0.00234192	0.339578	0.166667	4	4	5	FALSE	TGFBR1	10.5	0	4	0	0.94882	FALSE	0	TGFBR1	290	0.30303
2.74483	61.2312	0.00293253	0.00251256	0.364322	0.611111	9	9	5	FALSE	ESR2	17.7778	0	9	0	0.954083	FALSE	0	ESR2	504	0.306513
3.53793	0	0	0.00194932	0.282651	0	1	1	5	FALSE	DPP4	11	0	1	0	0.933212	FALSE	0	DPP4	0	0
3.57931	0	0	0.00192678	0.279383	1	2	2	6	FALSE	CCL17	8	0	2	0	0.932123	FALSE	0	CCL17	0	0.666667
3.27586	13.2977	0.000637	0.00210526	0.305263	0.666667	4	4	5	FALSE	CCL22	9.5	0	4	0	0.940109	FALSE	0	CCL22	160	0.475
2.5931	469.245	0.0224734	0.00265957	0.385638	0.484848	12	12	5	FALSE	CCL5	16.4167	0	12	0	0.958076	FALSE	0	CCL5	3156	0.273611
2.42759	323.961	0.0155154	0.00284091	0.411932	0.494505	14	14	4	FALSE	IL10	15.7857	0	14	0	0.962432	FALSE	0	IL10	2412	0.207707
2.73103	111.943	0.00536126	0.00252525	0.366162	0.555556	10	10	5	FALSE	CXCL10	15.5	0	10	0	0.954446	FALSE	0	CXCL10	854	0.322917
2.23448	406.609	0.0194736	0.00308642	0.447531	0.398268	22	22	4	FALSE	NFKB1	19.1364	0	22	0	0.967514	FALSE	0	NFKB1	4248	0.205767
2.47586	55.5286	0.00265942	0.00278552	0.4039	0.641026	13	13	4	FALSE	IFNG	17.6923	0	13	0	0.961162	FALSE	0	IFNG	810	0.25641
3.2	19.2386	0.000921	0.00215517	0.3125	0.166667	4	4	5	FALSE	CXCL12	9.5	0	4	0	0.942105	FALSE	0	CXCL12	142	0.375
2.22759	423.979	0.0203055	0.00309597	0.448916	0.385281	22	22	4	FALSE	RELA	19.4091	0	22	0	0.967695	FALSE	0	RELA	4368	0.20648
2.49655	51.6535	0.00247382	0.00276243	0.400552	0.564103	13	13	4	FALSE	ERBB2	20.4615	0	13	0	0.960617	FALSE	0	ERBB2	496	0.269231
2.43448	203.718	0.00975659	0.00283286	0.410765	0.437908	18	18	4	FALSE	FOS	17.6111	0	18	0	0.96225	FALSE	0	FOS	1564	0.222925
2.77931	304.877	0.0146014	0.00248139	0.359801	0.583333	9	9	5	FALSE	CD4	15.1111	0	9	0	0.953176	FALSE	0	CD4	2388	0.348837
3.77241	0	0	0.00182815	0.265082	0	1	1	6	FALSE	PLAT	9	0	1	0	0.927042	FALSE	0	PLAT	0	0
2.88276	0	0	0.00239234	0.34689	1	6	6	5	FALSE	IL2	18.6667	0	6	0	0.950454	FALSE	0	IL2	0	0.478632
2.6	57.6271	0.00275992	0.00265252	0.384615	0.47619	7	7	4	FALSE	SYK	19.8571	0	7	0	0.957895	FALSE	0	SYK	530	0.296375
3.2069	0	0	0.00215054	0.311828	1	2	2	5	FALSE	CDH2	16	0	2	0	0.941924	FALSE	0	CDH2	0	0.551724
2.90345	70.9666	0.00339879	0.0023753	0.344418	0.285714	7	7	5	FALSE	FGFR1	14.1429	0	7	0	0.949909	FALSE	0	FGFR1	384	0.321429
3.28966	0	0	0.00209644	0.303983	1	2	2	5	FALSE	COL18A1	14	0	2	0	0.939746	FALSE	0	COL18A1	0	0.7
2.61379	1078.12	0.051634	0.00263852	0.382586	0.236364	11	11	4	FALSE	MMP2	9.27273	0	11	0	0.957532	FALSE	0	MMP2	4380	0.15303
2.51724	1997.64	0.0956723	0.00273973	0.39726	0.191176	17	17	5	FALSE	MMP9	10.1176	0	17	0	0.960073	FALSE	0	MMP9	10242	0.148789
2.64828	0	0	0.00260417	0.377604	1	5	5	4	FALSE	NR3C1	28	0	5	0	0.956624	FALSE	0	NR3C1	0	0.4375
2.93103	4.92843	0.000236	0.00235294	0.341176	0.8	6	6	5	FALSE	JUND	16.1667	0	6	0	0.949183	FALSE	0	JUND	38	0.394309
2.53103	454.301	0.0217577	0.0027248	0.395095	0.277778	9	9	4	FALSE	PPARG	16	0	9	0	0.95971	FALSE	0	PPARG	2056	0.230392
2.55172	95.7439	0.00458543	0.0027027	0.391892	0.388889	9	9	4	FALSE	MET	18	0	9	0	0.959165	FALSE	0	MET	784	0.266998
3.13103	124.855	0.00597964	0.00220264	0.319383	0.333333	3	3	5	FALSE	PECAM1	14	0	3	0	0.94392	FALSE	0	PECAM1	472	0.401961
2.48276	242.823	0.0116295	0.00277778	0.402778	0.342857	15	15	4	FALSE	PTPN11	15.9333	0	15	0	0.96098	FALSE	0	PTPN11	1404	0.209649
3.42069	0	0	0.00201613	0.292339	1	3	3	5	FALSE	CTSG	8.33333	0	3	0	0.936298	FALSE	0	CTSG	0	0.438596
3.37931	90.2228	0.00432102	0.00204082	0.295918	0.5	4	4	5	FALSE	ELANE	6.75	0	4	0	0.937387	FALSE	0	ELANE	226	0.325
3.26207	94.2196	0.00451243	0.00211416	0.306554	0.5	4	4	5	FALSE	MPO	7.25	0	4	0	0.940472	FALSE	0	MPO	258	0.318182
2.64828	69.1771	0.00331308	0.00260417	0.377604	0.333333	7	7	4	FALSE	KIT	17.5714	0	7	0	0.956624	FALSE	0	KIT	522	0.288095
3.24138	0	0	0.00212766	0.308511	1	2	2	5	FALSE	CYP19A1	18.5	0	2	0	0.941016	FALSE	0	CYP19A1	0	0.660714
2.95862	169.156	0.00810136	0.002331	0.337995	0.166667	4	4	5	FALSE	GSTP1	14.5	0	4	0	0.948457	FALSE	0	GSTP1	974	0.358974
2.73103	582.973	0.0279202	0.00252525	0.366162	0.3	5	5	4	FALSE	DNMT1	16.6	0	5	0	0.954446	FALSE	0	DNMT1	1978	0.301818
3.71724	0	0	0.00185529	0.269017	1	2	2	5	FALSE	DNMT3A	3.5	0	2	0	0.928494	FALSE	0	DNMT3A	0	0.7
3.71724	0	0	0.00185529	0.269017	1	2	2	5	FALSE	DNMT3B	3.5	0	2	0	0.928494	FALSE	0	DNMT3B	0	0.7
3.28966	0	0	0.00209644	0.303983	1	2	2	5	FALSE	EDN1	14	0	2	0	0.939746	FALSE	0	EDN1	0	0.7
2.4069	983.864	0.0471199	0.00286533	0.415473	0.208791	14	14	4	FALSE	TGFB1	13.7143	0	14	0	0.962976	FALSE	0	TGFB1	5078	0.173993
3.11034	5.35996	0.000257	0.0022173	0.321508	0.5	4	4	5	FALSE	FGF10	12.5	0	4	0	0.944465	FALSE	0	FGF10	76	0.431034
3.17931	288.627	0.0138231	0.0021692	0.314534	0.333333	4	4	5	FALSE	FLT1	11.75	0	4	0	0.94265	FALSE	0	FLT1	2006	0.425926
3.11034	9.55321	0.000458	0.0022173	0.321508	0.4	5	5	5	FALSE	FGFR2	14.4	0	5	0	0.944465	FALSE	0	FGFR2	84	0.48
2.83448	14.7574	0.000707	0.00243309	0.352798	0.6	6	6	5	FALSE	PGR	19.8333	0	6	0	0.951724	FALSE	0	PGR	148	0.374214
2.50345	39.6539	0.00189913	0.00275482	0.399449	0.679487	13	13	4	FALSE	SP1	21.7692	0	13	0	0.960436	FALSE	0	SP1	330	0.290256
3.52414	0	0	0.00195695	0.283757	0	1	1	5	FALSE	FABP4	9	0	1	0	0.933575	FALSE	0	FABP4	0	0
4.17241	0	0	0.00165289	0.239669	0	1	1	6	FALSE	PGF	4	0	1	0	0.916515	FALSE	0	PGF	0	0
2.98621	0	0	0.00230947	0.334873	1	5	5	5	FALSE	JUNB	16.2	0	5	0	0.947731	FALSE	0	JUNB	0	0.426316
2.98621	0	0	0.00230947	0.334873	1	5	5	5	FALSE	FOSL1	16.2	0	5	0	0.947731	FALSE	0	FOSL1	0	0.426316
3.73103	2.33333	0.000112	0.00184843	0.268022	0	2	2	6	FALSE	GSR	4	0	2	0	0.928131	FALSE	0	GSR	8	0.6
4	0	0	0.00172414	0.25	0	1	1	6	FALSE	HMGCR	3	0	1	0	0.921053	FALSE	0	HMGCR	0	0
3.0069	288	0.0137931	0.00229358	0.332569	0.333333	3	3	5	FALSE	SREBF2	15.6667	0	3	0	0.947187	FALSE	0	SREBF2	1508	0.383333
2.49655	25.0263	0.00119858	0.00276243	0.400552	0.688889	10	10	5	FALSE	NFKBIA	22.6	0	10	0	0.960617	FALSE	0	NFKBIA	442	0.322857
2.85517	564.99	0.0270589	0.00241546	0.350242	0.25	9	9	5	FALSE	TIMP1	9.44444	0	9	0	0.95118	FALSE	0	TIMP1	3116	0.227642
2.91034	165.072	0.00790574	0.00236967	0.343602	0.333333	3	3	5	FALSE	VCAM1	18.6667	0	3	0	0.949728	FALSE	0	VCAM1	618	0.509259
3.4	0	0	0.0020284	0.294118	0	1	1	5	FALSE	ITGAV	14	0	1	0	0.936842	FALSE	0	ITGAV	0	0
3.28966	0	0	0.00209644	0.303983	1	2	2	5	FALSE	LCN2	14	0	2	0	0.939746	FALSE	0	LCN2	0	0.7
3.24138	5.49864	0.000263	0.00212766	0.308511	0.8	5	5	5	FALSE	MMP1	9.6	0	5	0	0.941016	FALSE	0	MMP1	86	0.417391
3.24828	313.436	0.0150113	0.00212314	0.307856	0.333333	7	7	5	FALSE	TIMP2	6.28571	0	7	0	0.940835	FALSE	0	TIMP2	1256	0.307143
3.44828	1.84103	8.82e-05	0.002	0.29	0.833333	4	4	6	FALSE	MMP3	9.5	0	4	0	0.935572	FALSE	0	MMP3	16	0.431818
3.84828	0	0	0.00179211	0.259857	0	1	1	6	FALSE	MMP12	9	0	1	0	0.925045	FALSE	0	MMP12	0	0
4.24138	0	0	0.00162602	0.235772	0	1	1	6	FALSE	MMP13	7	0	1	0	0.914701	FALSE	0	MMP13	0	0
3.44828	1.84103	8.82e-05	0.002	0.29	0.666667	3	3	5	FALSE	MMP14	9	0	3	0	0.935572	FALSE	0	MMP14	16	0.5625
3.44828	1.84103	8.82e-05	0.002	0.29	0.666667	3	3	5	FALSE	MMP7	9	0	3	0	0.935572	FALSE	0	MMP7	16	0.5625
3.83448	0	0	0.00179856	0.260791	1	2	2	6	FALSE	OTC	4	0	2	0	0.925408	FALSE	0	OTC	0	0.8
3.6069	5.92664	0.000284	0.00191205	0.277247	0	2	2	5	FALSE	SELP	3	0	2	0	0.931397	FALSE	0	SELP	56	0.5
3.27586	0	0	0.00210526	0.305263	1	2	2	5	FALSE	THRA	21.5	0	2	0	0.940109	FALSE	0	THRA	0	0.86
3.42069	0	0	0.00201613	0.292339	0	1	1	5	FALSE	PLA2G2A	10	0	1	0	0.936298	FALSE	0	PLA2G2A	0	0
3.33793	0	0	0.00206612	0.299587	1	2	2	5	FALSE	TGFBR2	9	0	2	0	0.938475	FALSE	0	TGFBR2	0	0.5625

## Sheet: Supplementary Table 5A-Entries 
Table S5A. Entries of GO Biological Precesses
Category	CategoryID	GO	Description	PARENT_GO	LogP	Enrichment	Z-score	#TotalGeneInLibrary	#GeneInGO	#GeneInHitList	#GeneInGOAndHitList	%InGO	STDV %InGO	GeneID	Hits	Log(q-value)	GeneList
GO Biological Processes	19	GO:0030335	positive regulation of cell migration	19_GO:0040011 locomotion	-50	16	28	30284	600	172	55	32	3.6	207|596|655|841|857|1906|1950|1956|2247|2255|2260|2321|2475|2821|3091|3309|3458|3479|3480|3553|3569|3627|3685|3815|3958|4233|4313|4316|4318|4323|4780|4846|5175|5228|5294|5295|5328|5578|5594|5743|6352|6367|6387|6403|6648|6667|6774|6868|7040|7046|7048|7099|7124|7422|407006	AKT1|BCL2|BMP7|CASP8|CAV1|EDN1|EGF|EGFR|FGF2|FGF10|FGFR1|FLT1|MTOR|GPI|HIF1A|HSPA5|IFNG|IGF1|IGF1R|IL1B|IL6|CXCL10|ITGAV|KIT|LGALS3|MET|MMP2|MMP7|MMP9|MMP14|NFE2L2|NOS3|PECAM1|PGF|PIK3CG|PIK3R1|PLAU|PRKCA|MAPK1|PTGS2|CCL5|CCL22|CXCL12|SELP|SOD2|SP1|STAT3|ADAM17|TGFB1|TGFBR1|TGFBR2|TLR4|TNF|VEGFA|MIR221	-46	MyList
GO Biological Processes	19	GO:2000147	positive regulation of cell motility	19_GO:0040011 locomotion	-49	15	28	30284	630	172	55	32	3.6	207|596|655|841|857|1906|1950|1956|2247|2255|2260|2321|2475|2821|3091|3309|3458|3479|3480|3553|3569|3627|3685|3815|3958|4233|4313|4316|4318|4323|4780|4846|5175|5228|5294|5295|5328|5578|5594|5743|6352|6367|6387|6403|6648|6667|6774|6868|7040|7046|7048|7099|7124|7422|407006	AKT1|BCL2|BMP7|CASP8|CAV1|EDN1|EGF|EGFR|FGF2|FGF10|FGFR1|FLT1|MTOR|GPI|HIF1A|HSPA5|IFNG|IGF1|IGF1R|IL1B|IL6|CXCL10|ITGAV|KIT|LGALS3|MET|MMP2|MMP7|MMP9|MMP14|NFE2L2|NOS3|PECAM1|PGF|PIK3CG|PIK3R1|PLAU|PRKCA|MAPK1|PTGS2|CCL5|CCL22|CXCL12|SELP|SOD2|SP1|STAT3|ADAM17|TGFB1|TGFBR1|TGFBR2|TLR4|TNF|VEGFA|MIR221	-45	MyList
GO Biological Processes	19	GO:0040017	positive regulation of locomotion	19_GO:0040011 locomotion	-48	15	27	30284	646	172	55	32	3.6	207|596|655|841|857|1906|1950|1956|2247|2255|2260|2321|2475|2821|3091|3309|3458|3479|3480|3553|3569|3627|3685|3815|3958|4233|4313|4316|4318|4323|4780|4846|5175|5228|5294|5295|5328|5578|5594|5743|6352|6367|6387|6403|6648|6667|6774|6868|7040|7046|7048|7099|7124|7422|407006	AKT1|BCL2|BMP7|CASP8|CAV1|EDN1|EGF|EGFR|FGF2|FGF10|FGFR1|FLT1|MTOR|GPI|HIF1A|HSPA5|IFNG|IGF1|IGF1R|IL1B|IL6|CXCL10|ITGAV|KIT|LGALS3|MET|MMP2|MMP7|MMP9|MMP14|NFE2L2|NOS3|PECAM1|PGF|PIK3CG|PIK3R1|PLAU|PRKCA|MAPK1|PTGS2|CCL5|CCL22|CXCL12|SELP|SOD2|SP1|STAT3|ADAM17|TGFB1|TGFBR1|TGFBR2|TLR4|TNF|VEGFA|MIR221	-45	MyList
GO Biological Processes	19	GO:0071345	cellular response to cytokine stimulus	19_GO:0050896 response to stimulus	-44	12	24	30284	787	172	55	32	3.6	207|355|834|857|920|1385|1432|1511|1513|1906|1956|2064|2167|2260|2263|2309|2321|2353|2932|3091|3309|3458|3480|3551|3553|3558|3569|3586|3606|3627|3815|4233|4313|4780|4790|4792|4843|5295|5594|5781|5894|5970|6352|6367|6387|6772|6774|6850|7099|7124|7157|7189|7412|7431|8061	AKT1|FAS|CASP1|CAV1|CD4|CREB1|MAPK14|CTSG|CTSK|EDN1|EGFR|ERBB2|FABP4|FGFR1|FGFR2|FOXO3|FLT1|FOS|GSK3B|HIF1A|HSPA5|IFNG|IGF1R|IKBKB|IL1B|IL2|IL6|IL10|IL18|CXCL10|KIT|MET|MMP2|NFE2L2|NFKB1|NFKBIA|NOS2|PIK3R1|MAPK1|PTPN11|RAF1|RELA|CCL5|CCL22|CXCL12|STAT1|STAT3|SYK|TLR4|TNF|TP53|TRAF6|VCAM1|VIM|FOSL1	-40	MyList
GO Biological Processes	19	GO:0032103	positive regulation of response to external stimulus	19_GO:0048518 positive regulation of biological process	-41	14	25	30284	588	172	48	28	3.4	673|834|836|857|1520|1906|2147|2167|2247|2255|2260|3458|3480|3551|3553|3558|3569|3606|3627|4233|4282|4317|4321|4792|5228|5294|5320|5327|5328|5578|5594|5599|5743|5781|5970|6352|6387|6850|6868|7040|7099|7124|7189|7422|8061|10062|114548|407006	BRAF|CASP1|CASP3|CAV1|CTSS|EDN1|F2|FABP4|FGF2|FGF10|FGFR1|IFNG|IGF1R|IKBKB|IL1B|IL2|IL6|IL18|CXCL10|MET|MIF|MMP8|MMP12|NFKBIA|PGF|PIK3CG|PLA2G2A|PLAT|PLAU|PRKCA|MAPK1|MAPK8|PTGS2|PTPN11|RELA|CCL5|CXCL12|SYK|ADAM17|TGFB1|TLR4|TNF|TRAF6|VEGFA|FOSL1|NR1H3|NLRP3|MIR221	-37	MyList
GO Biological Processes	19	GO:0071396	cellular response to lipid	19_GO:0050896 response to stimulus	-40	15	25	30284	546	172	46	27	3.4	196|207|367|834|1385|1432|1511|1645|1646|1906|1956|2099|2100|2263|2309|2353|2908|2932|2950|3480|3553|3569|3586|3606|3627|4313|4314|4317|4318|4790|4792|4843|4846|5241|5594|5599|5743|5970|6850|7040|7099|7124|7189|7431|10062|114548	AHR|AKT1|AR|CASP1|CREB1|MAPK14|CTSG|AKR1C1|AKR1C2|EDN1|EGFR|ESR1|ESR2|FGFR2|FOXO3|FOS|NR3C1|GSK3B|GSTP1|IGF1R|IL1B|IL6|IL10|IL18|CXCL10|MMP2|MMP3|MMP8|MMP9|NFKB1|NFKBIA|NOS2|NOS3|PGR|MAPK1|MAPK8|PTGS2|RELA|SYK|TGFB1|TLR4|TNF|TRAF6|VIM|NR1H3|NLRP3	-36	MyList
GO Biological Processes	19	GO:0002237	response to molecule of bacterial origin	19_GO:0044419 biological process involved in interspecies interaction between organisms	-39	20	27	30284	361	172	40	23	3.2	196|207|834|836|841|1432|1511|1906|1991|2255|2263|2353|2950|3553|3569|3586|3606|3627|4314|4317|4318|4353|4790|4792|4843|4846|5594|5599|5743|5970|6403|6648|6868|7099|7124|7189|7412|7431|10062|114548	AHR|AKT1|CASP1|CASP3|CASP8|MAPK14|CTSG|EDN1|ELANE|FGF10|FGFR2|FOS|GSTP1|IL1B|IL6|IL10|IL18|CXCL10|MMP3|MMP8|MMP9|MPO|NFKB1|NFKBIA|NOS2|NOS3|MAPK1|MAPK8|PTGS2|RELA|SELP|SOD2|ADAM17|TLR4|TNF|TRAF6|VCAM1|VIM|NR1H3|NLRP3	-36	MyList
GO Biological Processes	19	GO:0010562	positive regulation of phosphorus metabolic process	19_GO:0048518 positive regulation of biological process	-39	16	25	30284	493	172	44	26	3.3	207|355|367|595|673|857|920|1026|1906|1950|1956|1991|2064|2147|2247|2255|2260|2321|2475|3091|3458|3479|3553|3569|3606|3815|4282|4318|4846|5175|5294|5594|5604|5781|5894|6352|6850|6868|7040|7099|7124|7157|7189|7422	AKT1|FAS|AR|CCND1|BRAF|CAV1|CD4|CDKN1A|EDN1|EGF|EGFR|ELANE|ERBB2|F2|FGF2|FGF10|FGFR1|FLT1|MTOR|HIF1A|IFNG|IGF1|IL1B|IL6|IL18|KIT|MIF|MMP9|NOS3|PECAM1|PIK3CG|MAPK1|MAP2K1|PTPN11|RAF1|CCL5|SYK|ADAM17|TGFB1|TLR4|TNF|TP53|TRAF6|VEGFA	-36	MyList
GO Biological Processes	19	GO:0045937	positive regulation of phosphate metabolic process	19_GO:0048518 positive regulation of biological process	-39	16	25	30284	493	172	44	26	3.3	207|355|367|595|673|857|920|1026|1906|1950|1956|1991|2064|2147|2247|2255|2260|2321|2475|3091|3458|3479|3553|3569|3606|3815|4282|4318|4846|5175|5294|5594|5604|5781|5894|6352|6850|6868|7040|7099|7124|7157|7189|7422	AKT1|FAS|AR|CCND1|BRAF|CAV1|CD4|CDKN1A|EDN1|EGF|EGFR|ELANE|ERBB2|F2|FGF2|FGF10|FGFR1|FLT1|MTOR|HIF1A|IFNG|IGF1|IL1B|IL6|IL18|KIT|MIF|MMP9|NOS3|PECAM1|PIK3CG|MAPK1|MAP2K1|PTPN11|RAF1|CCL5|SYK|ADAM17|TGFB1|TLR4|TNF|TP53|TRAF6|VEGFA	-36	MyList
GO Biological Processes	19	GO:0048732	gland development	19_GO:0032502 developmental process	-39	17	26	30284	428	172	42	24	3.3	207|367|581|595|596|655|673|857|1385|1499|1588|1906|1950|1956|2099|2247|2255|2260|2263|2908|3091|3569|3586|4233|4313|4790|5009|5241|5290|5594|5604|5894|5970|6647|6648|7040|7046|7048|7067|7124|7422|7498	AKT1|AR|BAX|CCND1|BCL2|BMP7|BRAF|CAV1|CREB1|CTNNB1|CYP19A1|EDN1|EGF|EGFR|ESR1|FGF2|FGF10|FGFR1|FGFR2|NR3C1|HIF1A|IL6|IL10|MET|MMP2|NFKB1|OTC|PGR|PIK3CA|MAPK1|MAP2K1|RAF1|RELA|SOD1|SOD2|TGFB1|TGFBR1|TGFBR2|THRA|TNF|VEGFA|XDH	-36	MyList
GO Biological Processes	19	GO:0032496	response to lipopolysaccharide	19_GO:0044419 biological process involved in interspecies interaction between organisms	-39	20	27	30284	339	172	39	23	3.2	207|834|836|841|1432|1511|1906|1991|2255|2263|2353|2950|3553|3569|3586|3606|3627|4314|4317|4318|4353|4790|4792|4843|4846|5594|5599|5743|5970|6403|6648|6868|7099|7124|7189|7412|7431|10062|114548	AKT1|CASP1|CASP3|CASP8|MAPK14|CTSG|EDN1|ELANE|FGF10|FGFR2|FOS|GSTP1|IL1B|IL6|IL10|IL18|CXCL10|MMP3|MMP8|MMP9|MPO|NFKB1|NFKBIA|NOS2|NOS3|MAPK1|MAPK8|PTGS2|RELA|SELP|SOD2|ADAM17|TLR4|TNF|TRAF6|VCAM1|VIM|NR1H3|NLRP3	-36	MyList
GO Biological Processes	19	GO:0042327	positive regulation of phosphorylation	19_GO:0048518 positive regulation of biological process	-39	17	25	30284	437	172	42	24	3.3	207|355|367|595|673|857|920|1026|1906|1950|1956|1991|2064|2147|2247|2255|2260|2321|2475|3458|3479|3553|3569|3606|3815|4282|4318|5175|5294|5594|5604|5781|5894|6352|6850|6868|7040|7099|7124|7157|7189|7422	AKT1|FAS|AR|CCND1|BRAF|CAV1|CD4|CDKN1A|EDN1|EGF|EGFR|ELANE|ERBB2|F2|FGF2|FGF10|FGFR1|FLT1|MTOR|IFNG|IGF1|IL1B|IL6|IL18|KIT|MIF|MMP9|PECAM1|PIK3CG|MAPK1|MAP2K1|PTPN11|RAF1|CCL5|SYK|ADAM17|TGFB1|TLR4|TNF|TP53|TRAF6|VEGFA	-35	MyList
GO Biological Processes	19	GO:0070848	response to growth factor	19_GO:0050896 response to stimulus	-38	14	24	30284	562	172	45	26	3.4	142|207|627|655|673|836|847|857|1385|1432|1499|1513|1906|1956|2064|2247|2255|2260|2263|2309|2321|2353|2908|3480|3586|3725|3815|4137|4233|5228|5290|5468|5594|5781|5894|5970|6352|6774|7040|7046|7048|7099|7157|7412|7422	PARP1|AKT1|BDNF|BMP7|BRAF|CASP3|CAT|CAV1|CREB1|MAPK14|CTNNB1|CTSK|EDN1|EGFR|ERBB2|FGF2|FGF10|FGFR1|FGFR2|FOXO3|FLT1|FOS|NR3C1|IGF1R|IL10|JUN|KIT|MAPT|MET|PGF|PIK3CA|PPARG|MAPK1|PTPN11|RAF1|RELA|CCL5|STAT3|TGFB1|TGFBR1|TGFBR2|TLR4|TP53|VCAM1|VEGFA	-35	MyList
GO Biological Processes	19	GO:0009617	response to bacterium	19_GO:0044419 biological process involved in interspecies interaction between organisms	-38	12	22	30284	726	172	49	28	3.4	196|207|834|836|841|857|920|1432|1511|1906|1991|2147|2167|2255|2263|2353|2950|3553|3569|3586|3606|3627|3934|4314|4316|4317|4318|4353|4790|4792|4843|4846|5320|5594|5599|5743|5970|6403|6648|6850|6868|7099|7124|7189|7412|7431|10062|54210|114548	AHR|AKT1|CASP1|CASP3|CASP8|CAV1|CD4|MAPK14|CTSG|EDN1|ELANE|F2|FABP4|FGF10|FGFR2|FOS|GSTP1|IL1B|IL6|IL10|IL18|CXCL10|LCN2|MMP3|MMP7|MMP8|MMP9|MPO|NFKB1|NFKBIA|NOS2|NOS3|PLA2G2A|MAPK1|MAPK8|PTGS2|RELA|SELP|SOD2|SYK|ADAM17|TLR4|TNF|TRAF6|VCAM1|VIM|NR1H3|TREM1|NLRP3	-35	MyList
GO Biological Processes	19	GO:0071363	cellular response to growth factor stimulus	19_GO:0050896 response to stimulus	-38	15	24	30284	530	172	44	26	3.3	142|207|627|655|673|836|847|857|1385|1432|1499|1513|1906|1956|2064|2247|2255|2260|2263|2309|2321|2353|2908|3480|3586|3725|3815|4137|4233|5228|5290|5468|5781|5894|5970|6352|6774|7040|7046|7048|7099|7157|7412|7422	PARP1|AKT1|BDNF|BMP7|BRAF|CASP3|CAT|CAV1|CREB1|MAPK14|CTNNB1|CTSK|EDN1|EGFR|ERBB2|FGF2|FGF10|FGFR1|FGFR2|FOXO3|FLT1|FOS|NR3C1|IGF1R|IL10|JUN|KIT|MAPT|MET|PGF|PIK3CA|PPARG|PTPN11|RAF1|RELA|CCL5|STAT3|TGFB1|TGFBR1|TGFBR2|TLR4|TP53|VCAM1|VEGFA	-35	MyList
GO Biological Processes	19	GO:0007167	enzyme-linked receptor protein signaling pathway	19_GO:0050896 response to stimulus	-37	13	23	30284	629	172	46	27	3.4	142|207|367|627|655|673|836|920|1432|1499|1950|1956|2064|2247|2255|2260|2263|2308|2321|2353|2932|3479|3480|3725|3815|4233|4313|4318|5228|5290|5295|5327|5468|5594|5604|5781|5894|5970|6774|6850|7040|7046|7048|7157|7422|407006	PARP1|AKT1|AR|BDNF|BMP7|BRAF|CASP3|CD4|MAPK14|CTNNB1|EGF|EGFR|ERBB2|FGF2|FGF10|FGFR1|FGFR2|FOXO1|FLT1|FOS|GSK3B|IGF1|IGF1R|JUN|KIT|MET|MMP2|MMP9|PGF|PIK3CA|PIK3R1|PLAT|PPARG|MAPK1|MAP2K1|PTPN11|RAF1|RELA|STAT3|SYK|TGFB1|TGFBR1|TGFBR2|TP53|VEGFA|MIR221	-34	MyList
GO Biological Processes	19	GO:0048660	regulation of smooth muscle cell proliferation	19_GO:0050789 regulation of biological process	-37	31	30	30284	174	172	31	18	2.9	207|1026|1499|1786|1906|1956|1991|2247|2263|3458|3479|3480|3569|3586|3606|3725|4313|4318|4846|5290|5295|5468|5728|5743|6352|6648|6772|7040|7099|7124|407006	AKT1|CDKN1A|CTNNB1|DNMT1|EDN1|EGFR|ELANE|FGF2|FGFR2|IFNG|IGF1|IGF1R|IL6|IL10|IL18|JUN|MMP2|MMP9|NOS3|PIK3CA|PIK3R1|PPARG|PTEN|PTGS2|CCL5|SOD2|STAT1|TGFB1|TLR4|TNF|MIR221	-34	MyList
GO Biological Processes	19	GO:0043434	response to peptide hormone	19_GO:0050896 response to stimulus	-36	16	24	30284	431	172	40	23	3.2	142|207|655|673|760|847|857|1385|1432|1513|1906|1956|2064|2260|2263|2308|2321|2353|2475|2932|3480|3586|3815|4233|4780|4790|5009|5290|5295|5468|5594|5743|5894|5970|6387|6667|6772|6774|7040|7076	PARP1|AKT1|BMP7|BRAF|CA2|CAT|CAV1|CREB1|MAPK14|CTSK|EDN1|EGFR|ERBB2|FGFR1|FGFR2|FOXO1|FLT1|FOS|MTOR|GSK3B|IGF1R|IL10|KIT|MET|NFE2L2|NFKB1|OTC|PIK3CA|PIK3R1|PPARG|MAPK1|PTGS2|RAF1|RELA|CXCL12|SP1|STAT1|STAT3|TGFB1|TIMP1	-33	MyList
GO Biological Processes	19	GO:2001233	regulation of apoptotic signaling pathway	19_GO:0050896 response to stimulus	-36	17	25	30284	399	172	39	23	3.2	142|207|355|367|581|596|627|857|1499|2247|2255|2260|2932|2950|3091|3479|3553|3586|3685|3958|4282|4313|4318|4780|4846|5468|5743|5894|5970|6387|6647|6648|6667|7046|7099|7124|7157|27113|407006	PARP1|AKT1|FAS|AR|BAX|BCL2|BDNF|CAV1|CTNNB1|FGF2|FGF10|FGFR1|GSK3B|GSTP1|HIF1A|IGF1|IL1B|IL10|ITGAV|LGALS3|MIF|MMP2|MMP9|NFE2L2|NOS3|PPARG|PTGS2|RAF1|RELA|CXCL12|SOD1|SOD2|SP1|TGFBR1|TLR4|TNF|TP53|BBC3|MIR221	-33	MyList
GO Biological Processes	19	GO:0001934	positive regulation of protein phosphorylation	19_GO:0048518 positive regulation of biological process	-35	17	24	30284	414	172	39	23	3.2	207|355|595|673|857|920|1026|1906|1950|1956|1991|2064|2147|2247|2255|2260|2321|2475|3458|3479|3553|3569|3606|3815|4318|5175|5294|5594|5604|5781|5894|6850|6868|7040|7099|7124|7157|7189|7422	AKT1|FAS|CCND1|BRAF|CAV1|CD4|CDKN1A|EDN1|EGF|EGFR|ELANE|ERBB2|F2|FGF2|FGF10|FGFR1|FLT1|MTOR|IFNG|IGF1|IL1B|IL6|IL18|KIT|MMP9|PECAM1|PIK3CG|MAPK1|MAP2K1|PTPN11|RAF1|SYK|ADAM17|TGFB1|TLR4|TNF|TP53|TRAF6|VEGFA	-32	MyList
GO Biological Processes	19	GO:0042325	regulation of phosphorylation	19_GO:0050789 regulation of biological process	-35	12	21	30284	694	172	46	27	3.4	207|355|367|595|673|857|920|1026|1906|1950|1956|1991|2064|2147|2247|2255|2260|2321|2475|2950|3458|3479|3551|3553|3569|3606|3815|4282|4318|5175|5294|5594|5604|5728|5781|5894|6352|6850|6868|7040|7099|7124|7157|7189|7422|7498	AKT1|FAS|AR|CCND1|BRAF|CAV1|CD4|CDKN1A|EDN1|EGF|EGFR|ELANE|ERBB2|F2|FGF2|FGF10|FGFR1|FLT1|MTOR|GSTP1|IFNG|IGF1|IKBKB|IL1B|IL6|IL18|KIT|MIF|MMP9|PECAM1|PIK3CG|MAPK1|MAP2K1|PTEN|PTPN11|RAF1|CCL5|SYK|ADAM17|TGFB1|TLR4|TNF|TP53|TRAF6|VEGFA|XDH	-32	MyList
GO Biological Processes	19	GO:0050865	regulation of cell activation	19_GO:0032501 multicellular organismal process	-35	12	22	30284	653	172	45	26	3.4	196|207|596|673|836|857|920|1026|1499|1511|1803|2064|2147|2255|2309|2475|3458|3479|3553|3558|3569|3586|3606|3726|3958|4282|4317|4323|4846|5290|5320|5578|5781|6352|6403|6647|6850|7040|7048|7099|7124|7189|7412|10062|114548	AHR|AKT1|BCL2|BRAF|CASP3|CAV1|CD4|CDKN1A|CTNNB1|CTSG|DPP4|ERBB2|F2|FGF10|FOXO3|MTOR|IFNG|IGF1|IL1B|IL2|IL6|IL10|IL18|JUNB|LGALS3|MIF|MMP8|MMP14|NOS3|PIK3CA|PLA2G2A|PRKCA|PTPN11|CCL5|SELP|SOD1|SYK|TGFB1|TGFBR2|TLR4|TNF|TRAF6|VCAM1|NR1H3|NLRP3	-32	MyList
GO Biological Processes	19	GO:0006954	inflammatory response	19_GO:0050896 response to stimulus	-35	13	22	30284	577	172	43	25	3.3	207|240|834|836|841|1956|1991|2147|2353|2475|2908|3091|3458|3551|3553|3569|3586|3606|3627|3815|4137|4282|4780|4790|4843|5265|5294|5320|5970|6291|6352|6367|6403|6774|6850|7040|7076|7099|7124|7412|8061|114548|407006	AKT1|ALOX5|CASP1|CASP3|CASP8|EGFR|ELANE|F2|FOS|MTOR|NR3C1|HIF1A|IFNG|IKBKB|IL1B|IL6|IL10|IL18|CXCL10|KIT|MAPT|MIF|NFE2L2|NFKB1|NOS2|SERPINA1|PIK3CG|PLA2G2A|RELA|SAA4|CCL5|CCL22|SELP|STAT3|SYK|TGFB1|TIMP1|TLR4|TNF|VCAM1|FOSL1|NLRP3|MIR221	-32	MyList
GO Biological Processes	19	GO:0070482	response to oxygen levels	19_GO:0050896 response to stimulus	-34	18	24	30284	347	172	36	21	3.1	207|355|596|655|836|847|857|875|1026|1788|1803|1906|2263|2308|2309|2353|2475|3091|4313|4323|4780|4843|5228|5327|5328|5468|5743|6387|6648|6868|7040|7124|7157|7412|7422|27113	AKT1|FAS|BCL2|BMP7|CASP3|CAT|CAV1|CBS|CDKN1A|DNMT3A|DPP4|EDN1|FGFR2|FOXO1|FOXO3|FOS|MTOR|HIF1A|MMP2|MMP14|NFE2L2|NOS2|PGF|PLAT|PLAU|PPARG|PTGS2|CXCL12|SOD2|ADAM17|TGFB1|TNF|TP53|VCAM1|VEGFA|BBC3	-31	MyList
GO Biological Processes	19	GO:0032870	cellular response to hormone stimulus	19_GO:0050896 response to stimulus	-34	13	22	30284	562	172	42	24	3.3	142|207|367|760|857|1508|1520|1645|1646|1906|1956|2064|2099|2100|2260|2263|2308|2309|2321|2353|2475|2908|2932|3480|3815|4233|4780|4790|5241|5290|5295|5468|5594|5781|5894|5970|6667|6772|6774|7040|7067|10062	PARP1|AKT1|AR|CA2|CAV1|CTSB|CTSS|AKR1C1|AKR1C2|EDN1|EGFR|ERBB2|ESR1|ESR2|FGFR1|FGFR2|FOXO1|FOXO3|FLT1|FOS|MTOR|NR3C1|GSK3B|IGF1R|KIT|MET|NFE2L2|NFKB1|PGR|PIK3CA|PIK3R1|PPARG|MAPK1|PTPN11|RAF1|RELA|SP1|STAT1|STAT3|TGFB1|THRA|NR1H3	-31	MyList
GO Biological Processes	19	GO:0031401	positive regulation of protein modification process	19_GO:0048518 positive regulation of biological process	-34	13	22	30284	574	172	42	24	3.3	207|355|595|673|857|920|1026|1906|1950|1956|1991|2064|2147|2247|2255|2260|2321|2475|2932|3309|3458|3479|3553|3569|3606|3815|4318|5175|5294|5594|5604|5728|5781|5894|6850|6868|7040|7099|7124|7157|7189|7422	AKT1|FAS|CCND1|BRAF|CAV1|CD4|CDKN1A|EDN1|EGF|EGFR|ELANE|ERBB2|F2|FGF2|FGF10|FGFR1|FLT1|MTOR|GSK3B|HSPA5|IFNG|IGF1|IL1B|IL6|IL18|KIT|MMP9|PECAM1|PIK3CG|MAPK1|MAP2K1|PTEN|PTPN11|RAF1|SYK|ADAM17|TGFB1|TLR4|TNF|TP53|TRAF6|VEGFA	-31	MyList
GO Biological Processes	19	GO:0009612	response to mechanical stimulus	19_GO:0050896 response to stimulus	-33	24	27	30284	223	172	31	18	2.9	355|834|841|1000|1432|1499|1906|1956|2247|2353|2821|3480|3553|3627|3815|4313|4323|4353|4790|4792|5290|5599|5743|5894|5970|6387|6772|7040|7099|7124|8061	FAS|CASP1|CASP8|CDH2|MAPK14|CTNNB1|EDN1|EGFR|FGF2|FOS|GPI|IGF1R|IL1B|CXCL10|KIT|MMP2|MMP14|MPO|NFKB1|NFKBIA|PIK3CA|MAPK8|PTGS2|RAF1|RELA|CXCL12|STAT1|TGFB1|TLR4|TNF|FOSL1	-31	MyList
GO Biological Processes	19	GO:0071216	cellular response to biotic stimulus	19_GO:0050896 response to stimulus	-33	22	26	30284	252	172	32	19	3	196|207|834|1432|1511|2932|2950|3309|3553|3569|3586|3606|3627|4314|4317|4318|4790|4792|4843|4846|5594|5599|5743|5970|6850|7099|7124|7157|7189|7431|10062|114548	AHR|AKT1|CASP1|MAPK14|CTSG|GSK3B|GSTP1|HSPA5|IL1B|IL6|IL10|IL18|CXCL10|MMP3|MMP8|MMP9|NFKB1|NFKBIA|NOS2|NOS3|MAPK1|MAPK8|PTGS2|RELA|SYK|TLR4|TNF|TP53|TRAF6|VIM|NR1H3|NLRP3	-30	MyList
GO Biological Processes	19	GO:1901699	cellular response to nitrogen compound	19_GO:0050896 response to stimulus	-33	12	21	30284	633	172	43	25	3.3	142|196|207|760|836|857|1499|1906|1956|2064|2260|2263|2308|2309|2321|2353|2475|2932|3479|3480|3815|4233|4314|4780|4790|5290|5294|5295|5468|5594|5743|5894|5970|6667|6772|6774|6850|7040|7099|7124|7157|7412|7431	PARP1|AHR|AKT1|CA2|CASP3|CAV1|CTNNB1|EDN1|EGFR|ERBB2|FGFR1|FGFR2|FOXO1|FOXO3|FLT1|FOS|MTOR|GSK3B|IGF1|IGF1R|KIT|MET|MMP3|NFE2L2|NFKB1|PIK3CA|PIK3CG|PIK3R1|PPARG|MAPK1|PTGS2|RAF1|RELA|SP1|STAT1|STAT3|SYK|TGFB1|TLR4|TNF|TP53|VCAM1|VIM	-30	MyList
GO Biological Processes	19	GO:0035239	tube morphogenesis	19_GO:0032502 developmental process	-33	11	20	30284	694	172	44	26	3.3	207|367|581|596|655|836|841|857|1000|1432|1499|1890|1906|1950|1956|2099|2191|2247|2255|2260|2263|2321|2908|3091|3606|3685|3726|4233|4313|4323|4846|4883|5228|5241|5290|5294|5578|5743|6850|7040|7046|7048|7189|7422	AKT1|AR|BAX|BCL2|BMP7|CASP3|CASP8|CAV1|CDH2|MAPK14|CTNNB1|TYMP|EDN1|EGF|EGFR|ESR1|FAP|FGF2|FGF10|FGFR1|FGFR2|FLT1|NR3C1|HIF1A|IL18|ITGAV|JUNB|MET|MMP2|MMP14|NOS3|NPR3|PGF|PGR|PIK3CA|PIK3CG|PRKCA|PTGS2|SYK|TGFB1|TGFBR1|TGFBR2|TRAF6|VEGFA	-30	MyList
GO Biological Processes	19	GO:0001568	blood vessel development	19_GO:0032502 developmental process	-32	13	21	30284	534	172	40	23	3.2	196|207|581|841|857|1000|1432|1499|1890|1906|1950|2191|2247|2255|2260|2263|2308|2321|3091|3606|3685|3726|4313|4323|4846|4883|5175|5228|5290|5294|5578|5594|5604|5743|6850|7040|7046|7048|7422|8061	AHR|AKT1|BAX|CASP8|CAV1|CDH2|MAPK14|CTNNB1|TYMP|EDN1|EGF|FAP|FGF2|FGF10|FGFR1|FGFR2|FOXO1|FLT1|HIF1A|IL18|ITGAV|JUNB|MMP2|MMP14|NOS3|NPR3|PECAM1|PGF|PIK3CA|PIK3CG|PRKCA|MAPK1|MAP2K1|PTGS2|SYK|TGFB1|TGFBR1|TGFBR2|VEGFA|FOSL1	-30	MyList
GO Biological Processes	19	GO:0043408	regulation of MAPK cascade	19_GO:0050896 response to stimulus	-32	11	21	30284	662	172	43	25	3.3	355|367|673|857|920|1000|1499|1906|1950|1956|1991|2064|2247|2255|2260|2263|2308|2321|2950|3156|3479|3480|3553|3569|3815|4282|5294|5320|5468|5578|5594|5604|5781|5894|6647|6850|7040|7099|7124|7189|7422|7498|407006	FAS|AR|BRAF|CAV1|CD4|CDH2|CTNNB1|EDN1|EGF|EGFR|ELANE|ERBB2|FGF2|FGF10|FGFR1|FGFR2|FOXO1|FLT1|GSTP1|HMGCR|IGF1|IGF1R|IL1B|IL6|KIT|MIF|PIK3CG|PLA2G2A|PPARG|PRKCA|MAPK1|MAP2K1|PTPN11|RAF1|SOD1|SYK|TGFB1|TLR4|TNF|TRAF6|VEGFA|XDH|MIR221	-30	MyList
GO Biological Processes	19	GO:0007169	cell surface receptor protein tyrosine kinase signaling pathway	19_GO:0050896 response to stimulus	-32	15	22	30284	430	172	37	22	3.1	207|367|627|673|836|920|1432|1499|1950|1956|2064|2247|2255|2260|2263|2308|2321|2932|3479|3480|3815|4233|4313|4318|5228|5290|5295|5327|5594|5604|5781|5894|5970|6774|6850|7422|407006	AKT1|AR|BDNF|BRAF|CASP3|CD4|MAPK14|CTNNB1|EGF|EGFR|ERBB2|FGF2|FGF10|FGFR1|FGFR2|FOXO1|FLT1|GSK3B|IGF1|IGF1R|KIT|MET|MMP2|MMP9|PGF|PIK3CA|PIK3R1|PLAT|MAPK1|MAP2K1|PTPN11|RAF1|RELA|STAT3|SYK|VEGFA|MIR221	-29	MyList
GO Biological Processes	19	GO:0019221	cytokine-mediated signaling pathway	19_GO:0050896 response to stimulus	-32	15	22	30284	431	172	37	22	3.1	207|355|857|920|1511|1956|2064|2260|2263|2309|2321|3458|3480|3551|3553|3558|3569|3586|3606|3627|3815|4233|4792|5295|5781|5894|5970|6352|6367|6387|6772|6774|6850|7124|7157|7189|8061	AKT1|FAS|CAV1|CD4|CTSG|EGFR|ERBB2|FGFR1|FGFR2|FOXO3|FLT1|IFNG|IGF1R|IKBKB|IL1B|IL2|IL6|IL10|IL18|CXCL10|KIT|MET|NFKBIA|PIK3R1|PTPN11|RAF1|RELA|CCL5|CCL22|CXCL12|STAT1|STAT3|SYK|TNF|TP53|TRAF6|FOSL1	-29	MyList
GO Biological Processes	19	GO:0002694	regulation of leukocyte activation	19_GO:0002376 immune system process	-32	12	21	30284	593	172	41	24	3.2	196|207|596|673|836|857|920|1026|1499|1511|1803|2064|2255|2309|2475|3458|3479|3553|3558|3569|3586|3606|3726|3958|4282|4317|4323|5290|5320|5781|6352|6647|6850|7040|7048|7099|7124|7189|7412|10062|114548	AHR|AKT1|BCL2|BRAF|CASP3|CAV1|CD4|CDKN1A|CTNNB1|CTSG|DPP4|ERBB2|FGF10|FOXO3|MTOR|IFNG|IGF1|IL1B|IL2|IL6|IL10|IL18|JUNB|LGALS3|MIF|MMP8|MMP14|PIK3CA|PLA2G2A|PTPN11|CCL5|SOD1|SYK|TGFB1|TGFBR2|TLR4|TNF|TRAF6|VCAM1|NR1H3|NLRP3	-29	MyList
GO Biological Processes	19	GO:0048661	positive regulation of smooth muscle cell proliferation	19_GO:0048518 positive regulation of biological process	-32	42	31	30284	101	172	24	14	2.6	207|1786|1906|1956|1991|2247|2263|3479|3480|3569|3586|3606|3725|4313|4318|5290|5295|5743|6352|6772|7040|7099|7124|407006	AKT1|DNMT1|EDN1|EGFR|ELANE|FGF2|FGFR2|IGF1|IGF1R|IL6|IL10|IL18|JUN|MMP2|MMP9|PIK3CA|PIK3R1|PTGS2|CCL5|STAT1|TGFB1|TLR4|TNF|MIR221	-29	MyList
GO Biological Processes	19	GO:0001944	vasculature development	19_GO:0032502 developmental process	-32	13	21	30284	556	172	40	23	3.2	196|207|581|841|857|1000|1432|1499|1890|1906|1950|2191|2247|2255|2260|2263|2308|2321|3091|3606|3685|3726|4313|4323|4846|4883|5175|5228|5290|5294|5578|5594|5604|5743|6850|7040|7046|7048|7422|8061	AHR|AKT1|BAX|CASP8|CAV1|CDH2|MAPK14|CTNNB1|TYMP|EDN1|EGF|FAP|FGF2|FGF10|FGFR1|FGFR2|FOXO1|FLT1|HIF1A|IL18|ITGAV|JUNB|MMP2|MMP14|NOS3|NPR3|PECAM1|PGF|PIK3CA|PIK3CG|PRKCA|MAPK1|MAP2K1|PTGS2|SYK|TGFB1|TGFBR1|TGFBR2|VEGFA|FOSL1	-29	MyList
GO Biological Processes	19	GO:0050727	regulation of inflammatory response	19_GO:0050896 response to stimulus	-32	15	22	30284	442	172	37	22	3.1	196|240|834|836|1432|1588|1991|2099|2167|2950|3458|3479|3553|3558|3569|3586|3606|4314|4317|4318|4790|4792|5294|5320|5468|5743|5970|6352|6647|6774|6850|7040|7099|7124|10062|114548|407006	AHR|ALOX5|CASP1|CASP3|MAPK14|CYP19A1|ELANE|ESR1|FABP4|GSTP1|IFNG|IGF1|IL1B|IL2|IL6|IL10|IL18|MMP3|MMP8|MMP9|NFKB1|NFKBIA|PIK3CG|PLA2G2A|PPARG|PTGS2|RELA|CCL5|SOD1|STAT3|SYK|TGFB1|TLR4|TNF|NR1H3|NLRP3|MIR221	-29	MyList
GO Biological Processes	19	GO:0001932	regulation of protein phosphorylation	19_GO:0050789 regulation of biological process	-32	11	20	30284	644	172	42	24	3.3	207|355|595|673|857|920|1026|1906|1950|1956|1991|2064|2147|2247|2255|2260|2321|2475|2950|3458|3479|3553|3569|3606|3815|4318|5175|5294|5594|5604|5728|5781|5894|6850|6868|7040|7099|7124|7157|7189|7422|7498	AKT1|FAS|CCND1|BRAF|CAV1|CD4|CDKN1A|EDN1|EGF|EGFR|ELANE|ERBB2|F2|FGF2|FGF10|FGFR1|FLT1|MTOR|GSTP1|IFNG|IGF1|IL1B|IL6|IL18|KIT|MMP9|PECAM1|PIK3CG|MAPK1|MAP2K1|PTEN|PTPN11|RAF1|SYK|ADAM17|TGFB1|TLR4|TNF|TP53|TRAF6|VEGFA|XDH	-29	MyList
GO Biological Processes	19	GO:0036293	response to decreased oxygen levels	19_GO:0050896 response to stimulus	-31	18	23	30284	319	172	33	19	3	207|596|655|836|847|857|875|1788|1803|1906|2263|2309|2353|2475|3091|4313|4323|4780|4843|5228|5327|5328|5468|5743|6387|6648|6868|7040|7124|7157|7412|7422|27113	AKT1|BCL2|BMP7|CASP3|CAT|CAV1|CBS|DNMT3A|DPP4|EDN1|FGFR2|FOXO3|FOS|MTOR|HIF1A|MMP2|MMP14|NFE2L2|NOS2|PGF|PLAT|PLAU|PPARG|PTGS2|CXCL12|SOD2|ADAM17|TGFB1|TNF|TP53|VCAM1|VEGFA|BBC3	-29	MyList
GO Biological Processes	19	GO:0043085	positive regulation of catalytic activity	19_GO:0065007 biological regulation	-31	12	20	30284	584	172	40	23	3.2	207|355|595|834|841|920|1026|1432|1906|1956|1991|2064|2099|2247|2260|2263|2321|2932|3091|3458|3479|3553|4846|4883|5294|5447|5599|5604|5728|5894|6352|6774|6868|7099|7124|7189|7498|10062|26229|27113	AKT1|FAS|CCND1|CASP1|CASP8|CD4|CDKN1A|MAPK14|EDN1|EGFR|ELANE|ERBB2|ESR1|FGF2|FGFR1|FGFR2|FLT1|GSK3B|HIF1A|IFNG|IGF1|IL1B|NOS3|NPR3|PIK3CG|POR|MAPK8|MAP2K1|PTEN|RAF1|CCL5|STAT3|ADAM17|TLR4|TNF|TRAF6|XDH|NR1H3|B3GAT3|BBC3	-28	MyList
GO Biological Processes	19	GO:0008283	cell population proliferation	19_GO:0009987 cellular process	-31	11	20	30284	718	172	43	25	3.3	207|367|581|595|596|655|857|1026|1499|1950|1956|2064|2099|2191|2247|2255|2260|2263|2353|2950|3091|3479|3558|3569|3586|3606|3726|3815|4323|4883|5294|5594|5604|5894|6352|6772|6774|7040|7046|7099|7124|7157|7422	AKT1|AR|BAX|CCND1|BCL2|BMP7|CAV1|CDKN1A|CTNNB1|EGF|EGFR|ERBB2|ESR1|FAP|FGF2|FGF10|FGFR1|FGFR2|FOS|GSTP1|HIF1A|IGF1|IL2|IL6|IL10|IL18|JUNB|KIT|MMP14|NPR3|PIK3CG|MAPK1|MAP2K1|RAF1|CCL5|STAT1|STAT3|TGFB1|TGFBR1|TLR4|TNF|TP53|VEGFA	-28	MyList
GO Biological Processes	19	GO:0022407	regulation of cell-cell adhesion	19_GO:0050789 regulation of biological process	-30	13	21	30284	513	172	38	22	3.2	207|240|655|836|857|920|1432|1511|1803|1991|2064|2309|2475|3458|3479|3553|3558|3569|3586|3606|3958|5290|5320|5578|5781|5970|6352|6387|6403|6850|7040|7048|7124|7189|7412|7422|114548|407006	AKT1|ALOX5|BMP7|CASP3|CAV1|CD4|MAPK14|CTSG|DPP4|ELANE|ERBB2|FOXO3|MTOR|IFNG|IGF1|IL1B|IL2|IL6|IL10|IL18|LGALS3|PIK3CA|PLA2G2A|PRKCA|PTPN11|RELA|CCL5|CXCL12|SELP|SYK|TGFB1|TGFBR2|TNF|TRAF6|VCAM1|VEGFA|NLRP3|MIR221	-28	MyList
GO Biological Processes	19	GO:0009410	response to xenobiotic stimulus	19_GO:0050896 response to stimulus	-30	15	21	30284	437	172	36	21	3.1	196|595|596|673|836|847|1026|1385|1499|1559|1645|1788|1906|1956|2309|2353|2950|3553|3586|4313|4316|4780|4843|5009|5447|5743|5970|6647|6648|6772|6868|7040|7048|7124|7157|8061	AHR|CCND1|BCL2|BRAF|CASP3|CAT|CDKN1A|CREB1|CTNNB1|CYP2C9|AKR1C1|DNMT3A|EDN1|EGFR|FOXO3|FOS|GSTP1|IL1B|IL10|MMP2|MMP7|NFE2L2|NOS2|OTC|POR|PTGS2|RELA|SOD1|SOD2|STAT1|ADAM17|TGFB1|TGFBR2|TNF|TP53|FOSL1	-28	MyList
GO Biological Processes	19	GO:0001666	response to hypoxia	19_GO:0050896 response to stimulus	-30	18	23	30284	305	172	32	19	3	596|655|836|847|857|875|1788|1803|1906|2263|2309|2353|2475|3091|4313|4323|4780|4843|5228|5327|5328|5468|5743|6387|6648|6868|7040|7124|7157|7412|7422|27113	BCL2|BMP7|CASP3|CAT|CAV1|CBS|DNMT3A|DPP4|EDN1|FGFR2|FOXO3|FOS|MTOR|HIF1A|MMP2|MMP14|NFE2L2|NOS2|PGF|PLAT|PLAU|PPARG|PTGS2|CXCL12|SOD2|ADAM17|TGFB1|TNF|TP53|VCAM1|VEGFA|BBC3	-28	MyList
GO Biological Processes	19	GO:0051249	regulation of lymphocyte activation	19_GO:0002376 immune system process	-30	13	21	30284	521	172	38	22	3.2	196|207|596|673|836|857|920|1026|1499|1511|1803|2064|2255|2309|2475|3458|3479|3553|3558|3569|3586|3606|3726|3958|4282|4323|5290|5320|5781|6352|6647|6850|7040|7048|7099|7189|7412|114548	AHR|AKT1|BCL2|BRAF|CASP3|CAV1|CD4|CDKN1A|CTNNB1|CTSG|DPP4|ERBB2|FGF10|FOXO3|MTOR|IFNG|IGF1|IL1B|IL2|IL6|IL10|IL18|JUNB|LGALS3|MIF|MMP14|PIK3CA|PLA2G2A|PTPN11|CCL5|SOD1|SYK|TGFB1|TGFBR2|TLR4|TRAF6|VCAM1|NLRP3	-28	MyList
GO Biological Processes	19	GO:1903037	regulation of leukocyte cell-cell adhesion	19_GO:0050789 regulation of biological process	-29	15	21	30284	395	172	34	20	3	207|240|836|857|920|1511|1803|1991|2064|2309|2475|3458|3479|3553|3558|3569|3586|3606|3958|5290|5320|5781|5970|6352|6387|6403|6850|7040|7048|7124|7189|7412|114548|407006	AKT1|ALOX5|CASP3|CAV1|CD4|CTSG|DPP4|ELANE|ERBB2|FOXO3|MTOR|IFNG|IGF1|IL1B|IL2|IL6|IL10|IL18|LGALS3|PIK3CA|PLA2G2A|PTPN11|RELA|CCL5|CXCL12|SELP|SYK|TGFB1|TGFBR2|TNF|TRAF6|VCAM1|NLRP3|MIR221	-27	MyList
GO Biological Processes	19	GO:0006935	chemotaxis	19_GO:0040011 locomotion	-29	17	22	30284	341	172	32	19	3	240|1432|1511|1803|1890|2247|2255|2321|3553|3569|3586|3627|3685|3815|3958|4233|4282|4313|5228|5294|5328|5594|5604|6352|6361|6367|6387|6850|7412|7422|8061|54210	ALOX5|MAPK14|CTSG|DPP4|TYMP|FGF2|FGF10|FLT1|IL1B|IL6|IL10|CXCL10|ITGAV|KIT|LGALS3|MET|MIF|MMP2|PGF|PIK3CG|PLAU|MAPK1|MAP2K1|CCL5|CCL17|CCL22|CXCL12|SYK|VCAM1|VEGFA|FOSL1|TREM1	-26	MyList
GO Biological Processes	19	GO:0042330	taxis	19_GO:0040011 locomotion	-29	16	22	30284	343	172	32	19	3	240|1432|1511|1803|1890|2247|2255|2321|3553|3569|3586|3627|3685|3815|3958|4233|4282|4313|5228|5294|5328|5594|5604|6352|6361|6367|6387|6850|7412|7422|8061|54210	ALOX5|MAPK14|CTSG|DPP4|TYMP|FGF2|FGF10|FLT1|IL1B|IL6|IL10|CXCL10|ITGAV|KIT|LGALS3|MET|MIF|MMP2|PGF|PIK3CG|PLAU|MAPK1|MAP2K1|CCL5|CCL17|CCL22|CXCL12|SYK|VCAM1|VEGFA|FOSL1|TREM1	-26	MyList
GO Biological Processes	19	GO:0071219	cellular response to molecule of bacterial origin	19_GO:0044419 biological process involved in interspecies interaction between organisms	-29	22	24	30284	226	172	28	16	2.8	196|207|834|1432|1511|2950|3553|3569|3586|3606|3627|4314|4317|4318|4790|4792|4843|4846|5594|5599|5743|5970|7099|7124|7189|7431|10062|114548	AHR|AKT1|CASP1|MAPK14|CTSG|GSTP1|IL1B|IL6|IL10|IL18|CXCL10|MMP3|MMP8|MMP9|NFKB1|NFKBIA|NOS2|NOS3|MAPK1|MAPK8|PTGS2|RELA|TLR4|TNF|TRAF6|VIM|NR1H3|NLRP3	-26	MyList
GO Biological Processes	19	GO:2000377	regulation of reactive oxygen species metabolic process	19_GO:0050789 regulation of biological process	-28	28	26	30284	156	172	25	15	2.7	240|355|596|655|1026|1432|1645|1956|2147|2308|2309|2950|3091|4137|4314|4780|6647|6648|6850|7040|7048|7099|7124|7157|7498	ALOX5|FAS|BCL2|BMP7|CDKN1A|MAPK14|AKR1C1|EGFR|F2|FOXO1|FOXO3|GSTP1|HIF1A|MAPT|MMP3|NFE2L2|SOD1|SOD2|SYK|TGFB1|TGFBR2|TLR4|TNF|TP53|XDH	-26	MyList
GO Biological Processes	19	GO:0045785	positive regulation of cell adhesion	19_GO:0048518 positive regulation of biological process	-28	13	20	30284	499	172	36	21	3.1	207|240|655|673|857|920|1511|1803|1991|2064|2309|2475|2932|3458|3479|3553|3558|3569|3586|3606|3685|5290|5578|5781|5970|6352|6387|6403|6850|7040|7048|7124|7189|7412|7422|114548	AKT1|ALOX5|BMP7|BRAF|CAV1|CD4|CTSG|DPP4|ELANE|ERBB2|FOXO3|MTOR|GSK3B|IFNG|IGF1|IL1B|IL2|IL6|IL10|IL18|ITGAV|PIK3CA|PRKCA|PTPN11|RELA|CCL5|CXCL12|SELP|SYK|TGFB1|TGFBR2|TNF|TRAF6|VCAM1|VEGFA|NLRP3	-26	MyList
GO Biological Processes	19	GO:0043410	positive regulation of MAPK cascade	19_GO:0048518 positive regulation of biological process	-28	13	20	30284	464	172	35	20	3.1	367|673|920|1000|1499|1906|1950|1956|1991|2064|2247|2255|2260|2263|2321|3479|3480|3553|3569|3815|4282|5294|5320|5578|5604|5781|5894|6647|6850|7040|7099|7124|7189|7422|7498	AR|BRAF|CD4|CDH2|CTNNB1|EDN1|EGF|EGFR|ELANE|ERBB2|FGF2|FGF10|FGFR1|FGFR2|FLT1|IGF1|IGF1R|IL1B|IL6|KIT|MIF|PIK3CG|PLA2G2A|PRKCA|MAP2K1|PTPN11|RAF1|SOD1|SYK|TGFB1|TLR4|TNF|TRAF6|VEGFA|XDH	-26	MyList
GO Biological Processes	19	GO:0002521	leukocyte differentiation	19_GO:0032502 developmental process	-28	14	21	30284	426	172	34	20	3	142|581|596|673|841|920|1385|1432|1499|1513|2064|2353|2475|2908|3458|3558|3569|3586|3726|3815|4318|5295|5468|6774|6850|6868|7040|7048|7099|7124|7157|7189|7412|7422	PARP1|BAX|BCL2|BRAF|CASP8|CD4|CREB1|MAPK14|CTNNB1|CTSK|ERBB2|FOS|MTOR|NR3C1|IFNG|IL2|IL6|IL10|JUNB|KIT|MMP9|PIK3R1|PPARG|STAT3|SYK|ADAM17|TGFB1|TGFBR2|TLR4|TNF|TP53|TRAF6|VCAM1|VEGFA	-26	MyList
GO Biological Processes	19	GO:0031667	response to nutrient levels	19_GO:0050896 response to stimulus	-28	12	20	30284	510	172	36	21	3.1	207|213|355|596|655|847|857|875|1026|1432|1513|1788|1956|2308|2309|2353|2475|3309|3480|3627|4353|4780|5009|5468|5594|5599|5743|5970|6648|6667|6721|6772|7040|7124|7157|7412	AKT1|ALB|FAS|BCL2|BMP7|CAT|CAV1|CBS|CDKN1A|MAPK14|CTSK|DNMT3A|EGFR|FOXO1|FOXO3|FOS|MTOR|HSPA5|IGF1R|CXCL10|MPO|NFE2L2|OTC|PPARG|MAPK1|MAPK8|PTGS2|RELA|SOD2|SP1|SREBF2|STAT1|TGFB1|TNF|TP53|VCAM1	-26	MyList
GO Biological Processes	19	GO:0030097	hemopoiesis	19_GO:0032502 developmental process	-28	10	18	30284	690	172	40	23	3.2	142|581|596|673|836|841|920|1385|1432|1499|1513|2064|2263|2353|2475|2908|3091|3458|3558|3569|3586|3726|3815|4318|5295|5468|5781|6648|6774|6850|6868|7040|7048|7067|7099|7124|7157|7189|7412|7422	PARP1|BAX|BCL2|BRAF|CASP3|CASP8|CD4|CREB1|MAPK14|CTNNB1|CTSK|ERBB2|FGFR2|FOS|MTOR|NR3C1|HIF1A|IFNG|IL2|IL6|IL10|JUNB|KIT|MMP9|PIK3R1|PPARG|PTPN11|SOD2|STAT3|SYK|ADAM17|TGFB1|TGFBR2|THRA|TLR4|TNF|TP53|TRAF6|VCAM1|VEGFA	-26	MyList
GO Biological Processes	19	GO:0045596	negative regulation of cell differentiation	19_GO:0032502 developmental process	-28	9.8	18	30284	739	172	41	24	3.2	595|627|655|857|1499|1786|1956|2064|2147|2255|2308|2309|2932|3458|3479|3553|3558|3569|3606|3627|3685|4318|4780|4792|5295|5468|5594|5728|5781|6648|6772|6774|7040|7046|7099|7124|7157|7422|7498|10062|407006	CCND1|BDNF|BMP7|CAV1|CTNNB1|DNMT1|EGFR|ERBB2|F2|FGF10|FOXO1|FOXO3|GSK3B|IFNG|IGF1|IL1B|IL2|IL6|IL18|CXCL10|ITGAV|MMP9|NFE2L2|NFKBIA|PIK3R1|PPARG|MAPK1|PTEN|PTPN11|SOD2|STAT1|STAT3|TGFB1|TGFBR1|TLR4|TNF|TP53|VEGFA|XDH|NR1H3|MIR221	-26	MyList
GO Biological Processes	19	GO:0040011	locomotion	19_GO:0040011 locomotion	-28	15	21	30284	364	172	32	19	3	240|1432|1511|1803|1890|2247|2255|2321|3553|3569|3586|3627|3685|3815|3958|4233|4282|4313|5228|5294|5328|5594|5604|6352|6361|6367|6387|6850|7412|7422|8061|54210	ALOX5|MAPK14|CTSG|DPP4|TYMP|FGF2|FGF10|FLT1|IL1B|IL6|IL10|CXCL10|ITGAV|KIT|LGALS3|MET|MIF|MMP2|PGF|PIK3CG|PLAU|MAPK1|MAP2K1|CCL5|CCL17|CCL22|CXCL12|SYK|VCAM1|VEGFA|FOSL1|TREM1	-26	MyList
GO Biological Processes	19	GO:0071222	cellular response to lipopolysaccharide	19_GO:0044419 biological process involved in interspecies interaction between organisms	-28	22	24	30284	212	172	27	16	2.8	207|834|1432|1511|2950|3553|3569|3586|3606|3627|4314|4317|4318|4790|4792|4843|4846|5594|5599|5743|5970|7099|7124|7189|7431|10062|114548	AKT1|CASP1|MAPK14|CTSG|GSTP1|IL1B|IL6|IL10|IL18|CXCL10|MMP3|MMP8|MMP9|NFKB1|NFKBIA|NOS2|NOS3|MAPK1|MAPK8|PTGS2|RELA|TLR4|TNF|TRAF6|VIM|NR1H3|NLRP3	-26	MyList
GO Biological Processes	19	GO:0048514	blood vessel morphogenesis	19_GO:0032502 developmental process	-28	14	20	30284	441	172	34	20	3	207|581|841|857|1000|1432|1499|1890|1906|1950|2191|2247|2255|2260|2263|2321|3091|3606|3685|3726|4313|4323|4846|4883|5228|5290|5294|5578|5743|6850|7040|7046|7048|7422	AKT1|BAX|CASP8|CAV1|CDH2|MAPK14|CTNNB1|TYMP|EDN1|EGF|FAP|FGF2|FGF10|FGFR1|FGFR2|FLT1|HIF1A|IL18|ITGAV|JUNB|MMP2|MMP14|NOS3|NPR3|PGF|PIK3CA|PIK3CG|PRKCA|PTGS2|SYK|TGFB1|TGFBR1|TGFBR2|VEGFA	-25	MyList
GO Biological Processes	19	GO:2001234	negative regulation of apoptotic signaling pathway	19_GO:0048519 negative regulation of biological process	-28	20	23	30284	243	172	28	16	2.8	207|367|581|596|627|1499|2247|2255|2932|2950|3091|3479|3553|3586|3685|3958|4282|4318|4780|4846|5743|5894|5970|6387|6648|7046|7124|407006	AKT1|AR|BAX|BCL2|BDNF|CTNNB1|FGF2|FGF10|GSK3B|GSTP1|HIF1A|IGF1|IL1B|IL10|ITGAV|LGALS3|MIF|MMP9|NFE2L2|NOS3|PTGS2|RAF1|RELA|CXCL12|SOD2|TGFBR1|TNF|MIR221	-25	MyList
GO Biological Processes	19	GO:0050678	regulation of epithelial cell proliferation	19_GO:0050789 regulation of biological process	-28	14	20	30284	409	172	33	19	3	207|240|367|581|595|857|1499|1950|1956|2064|2247|2255|2260|2263|2321|3091|3479|3586|4321|5241|5468|5578|6352|6387|6667|6772|6774|6868|7040|7046|7124|7422|7498	AKT1|ALOX5|AR|BAX|CCND1|CAV1|CTNNB1|EGF|EGFR|ERBB2|FGF2|FGF10|FGFR1|FGFR2|FLT1|HIF1A|IGF1|IL10|MMP12|PGR|PPARG|PRKCA|CCL5|CXCL12|SP1|STAT1|STAT3|ADAM17|TGFB1|TGFBR1|TNF|VEGFA|XDH	-25	MyList
GO Biological Processes	19	GO:0010720	positive regulation of cell development	19_GO:0032502 developmental process	-28	13	20	30284	447	172	34	20	3	596|627|673|841|920|1385|1499|1956|2247|2309|2353|2475|3091|3458|3553|3558|3569|3586|3606|3815|4137|4323|5578|5604|5970|6387|6850|7040|7048|7124|7189|7422|114548|407006	BCL2|BDNF|BRAF|CASP8|CD4|CREB1|CTNNB1|EGFR|FGF2|FOXO3|FOS|MTOR|HIF1A|IFNG|IL1B|IL2|IL6|IL10|IL18|KIT|MAPT|MMP14|PRKCA|MAP2K1|RELA|CXCL12|SYK|TGFB1|TGFBR2|TNF|TRAF6|VEGFA|NLRP3|MIR221	-25	MyList
GO Biological Processes	19	GO:0009611	response to wounding	19_GO:0050896 response to stimulus	-28	13	20	30284	448	172	34	20	3	308|581|596|836|1026|1432|1511|2064|2147|2247|2255|3091|3479|3569|3685|4313|4321|5265|5290|5294|5327|5328|5894|6647|6648|6850|6868|7040|7046|7076|7099|7124|7422|8061	ANXA5|BAX|BCL2|CASP3|CDKN1A|MAPK14|CTSG|ERBB2|F2|FGF2|FGF10|HIF1A|IGF1|IL6|ITGAV|MMP2|MMP12|SERPINA1|PIK3CA|PIK3CG|PLAT|PLAU|RAF1|SOD1|SOD2|SYK|ADAM17|TGFB1|TGFBR1|TIMP1|TLR4|TNF|VEGFA|FOSL1	-25	MyList
GO Biological Processes	19	GO:1902893	regulation of miRNA transcription	19_GO:0050789 regulation of biological process	-27	46	30	30284	76	172	20	12	2.4	367|1956|2099|2247|2309|2353|2908|3091|3569|3586|3725|5468|5970|6721|6774|7040|7124|7157|7422|8061	AR|EGFR|ESR1|FGF2|FOXO3|FOS|NR3C1|HIF1A|IL6|IL10|JUN|PPARG|RELA|SREBF2|STAT3|TGFB1|TNF|TP53|VEGFA|FOSL1	-25	MyList
GO Biological Processes	19	GO:2000628	regulation of miRNA metabolic process	19_GO:0050789 regulation of biological process	-27	40	28	30284	92	172	21	12	2.5	367|1956|2099|2247|2309|2353|2908|3091|3569|3586|3725|4790|5468|5970|6721|6774|7040|7124|7157|7422|8061	AR|EGFR|ESR1|FGF2|FOXO3|FOS|NR3C1|HIF1A|IL6|IL10|JUN|NFKB1|PPARG|RELA|SREBF2|STAT3|TGFB1|TNF|TP53|VEGFA|FOSL1	-25	MyList
GO Biological Processes	19	GO:0001525	angiogenesis	19_GO:0032502 developmental process	-27	16	21	30284	347	172	31	18	2.9	207|841|857|1432|1499|1890|1906|1950|2191|2247|2255|2260|2263|2321|3091|3606|3685|4313|4323|4846|4883|5228|5290|5294|5578|5743|6850|7040|7046|7048|7422	AKT1|CASP8|CAV1|MAPK14|CTNNB1|TYMP|EDN1|EGF|FAP|FGF2|FGF10|FGFR1|FGFR2|FLT1|HIF1A|IL18|ITGAV|MMP2|MMP14|NOS3|NPR3|PGF|PIK3CA|PIK3CG|PRKCA|PTGS2|SYK|TGFB1|TGFBR1|TGFBR2|VEGFA	-25	MyList
GO Biological Processes	19	GO:0043068	positive regulation of programmed cell death	19_GO:0048518 positive regulation of biological process	-27	11	19	30284	586	172	37	22	3.1	142|355|581|596|655|836|841|857|1026|1499|1509|2191|2308|2309|2908|2932|3458|3569|3586|3725|4313|4318|5468|5599|5743|6352|6647|6648|6667|7040|7046|7099|7124|7157|8061|27113|407006	PARP1|FAS|BAX|BCL2|BMP7|CASP3|CASP8|CAV1|CDKN1A|CTNNB1|CTSD|FAP|FOXO1|FOXO3|NR3C1|GSK3B|IFNG|IL6|IL10|JUN|MMP2|MMP9|PPARG|MAPK8|PTGS2|CCL5|SOD1|SOD2|SP1|TGFB1|TGFBR1|TLR4|TNF|TP53|FOSL1|BBC3|MIR221	-25	MyList
GO Biological Processes	19	GO:0048545	response to steroid hormone	19_GO:0050896 response to stimulus	-27	18	22	30284	284	172	29	17	2.9	142|367|596|836|857|1026|1906|1956|2099|2100|2309|2353|2821|2908|3480|3569|3586|3725|3726|3727|5241|5290|5594|5743|5970|7040|7124|8061|10062	PARP1|AR|BCL2|CASP3|CAV1|CDKN1A|EDN1|EGFR|ESR1|ESR2|FOXO3|FOS|GPI|NR3C1|IGF1R|IL6|IL10|JUN|JUNB|JUND|PGR|PIK3CA|MAPK1|PTGS2|RELA|TGFB1|TNF|FOSL1|NR1H3	-25	MyList
GO Biological Processes	19	GO:2000630	positive regulation of miRNA metabolic process	19_GO:0048518 positive regulation of biological process	-27	50	30	30284	67	172	19	11	2.4	367|1956|2247|2309|2353|2908|3091|3569|3586|3725|4790|5468|5970|6721|6774|7040|7124|7157|8061	AR|EGFR|FGF2|FOXO3|FOS|NR3C1|HIF1A|IL6|IL10|JUN|NFKB1|PPARG|RELA|SREBF2|STAT3|TGFB1|TNF|TP53|FOSL1	-25	MyList
GO Biological Processes	19	GO:0071214	cellular response to abiotic stimulus	19_GO:0050896 response to stimulus	-27	16	21	30284	328	172	30	17	2.9	142|355|581|834|836|841|1026|1432|1956|2247|2475|3480|3553|4312|4313|4314|4318|4790|5290|5295|5599|5728|5743|7040|7076|7099|7124|7157|27113|114548	PARP1|FAS|BAX|CASP1|CASP3|CASP8|CDKN1A|MAPK14|EGFR|FGF2|MTOR|IGF1R|IL1B|MMP1|MMP2|MMP3|MMP9|NFKB1|PIK3CA|PIK3R1|MAPK8|PTEN|PTGS2|TGFB1|TIMP1|TLR4|TNF|TP53|BBC3|NLRP3	-24	MyList
GO Biological Processes	19	GO:0104004	cellular response to environmental stimulus	19_GO:0050896 response to stimulus	-27	16	21	30284	328	172	30	17	2.9	142|355|581|834|836|841|1026|1432|1956|2247|2475|3480|3553|4312|4313|4314|4318|4790|5290|5295|5599|5728|5743|7040|7076|7099|7124|7157|27113|114548	PARP1|FAS|BAX|CASP1|CASP3|CASP8|CDKN1A|MAPK14|EGFR|FGF2|MTOR|IGF1R|IL1B|MMP1|MMP2|MMP3|MMP9|NFKB1|PIK3CA|PIK3R1|MAPK8|PTEN|PTGS2|TGFB1|TIMP1|TLR4|TNF|TP53|BBC3|NLRP3	-24	MyList
GO Biological Processes	19	GO:1902895	positive regulation of miRNA transcription	19_GO:0048518 positive regulation of biological process	-27	57	31	30284	56	172	18	10	2.3	367|1956|2247|2309|2353|2908|3091|3569|3586|3725|5468|5970|6721|6774|7040|7124|7157|8061	AR|EGFR|FGF2|FOXO3|FOS|NR3C1|HIF1A|IL6|IL10|JUN|PPARG|RELA|SREBF2|STAT3|TGFB1|TNF|TP53|FOSL1	-24	MyList
GO Biological Processes	19	GO:0001775	cell activation	19_GO:0032501 multicellular organismal process	-27	9.3	18	30284	754	172	40	23	3.2	581|596|673|841|920|1432|1499|1511|1803|1906|1956|2064|2147|2475|3458|3479|3553|3558|3569|3586|3606|3627|3815|4137|5290|5294|5295|5327|6352|6774|6850|6868|7040|7046|7048|7099|7124|7157|7189|7412	BAX|BCL2|BRAF|CASP8|CD4|MAPK14|CTNNB1|CTSG|DPP4|EDN1|EGFR|ERBB2|F2|MTOR|IFNG|IGF1|IL1B|IL2|IL6|IL10|IL18|CXCL10|KIT|MAPT|PIK3CA|PIK3CG|PIK3R1|PLAT|CCL5|STAT3|SYK|ADAM17|TGFB1|TGFBR1|TGFBR2|TLR4|TNF|TP53|TRAF6|VCAM1	-24	MyList
GO Biological Processes	19	GO:0071375	cellular response to peptide hormone stimulus	19_GO:0050896 response to stimulus	-27	17	21	30284	299	172	29	17	2.9	142|207|760|857|1906|1956|2064|2260|2263|2308|2321|2353|2475|2932|3480|3815|4233|4780|4790|5290|5295|5468|5594|5894|5970|6667|6772|6774|7040	PARP1|AKT1|CA2|CAV1|EDN1|EGFR|ERBB2|FGFR1|FGFR2|FOXO1|FLT1|FOS|MTOR|GSK3B|IGF1R|KIT|MET|NFE2L2|NFKB1|PIK3CA|PIK3R1|PPARG|MAPK1|RAF1|RELA|SP1|STAT1|STAT3|TGFB1	-24	MyList
GO Biological Processes	19	GO:0006979	response to oxidative stress	19_GO:0050896 response to stimulus	-26	15	20	30284	375	172	31	18	2.9	142|207|596|836|847|1906|1956|2308|2309|2353|2936|2950|3091|3569|4137|4313|4314|4323|4353|4780|4846|5599|5742|5743|5970|6647|6648|6667|6772|7157|8061	PARP1|AKT1|BCL2|CASP3|CAT|EDN1|EGFR|FOXO1|FOXO3|FOS|GSR|GSTP1|HIF1A|IL6|MAPT|MMP2|MMP3|MMP14|MPO|NFE2L2|NOS3|MAPK8|PTGS1|PTGS2|RELA|SOD1|SOD2|SP1|STAT1|TP53|FOSL1	-24	MyList
GO Biological Processes	19	GO:0062197	cellular response to chemical stress	19_GO:0050896 response to stimulus	-26	17	21	30284	287	172	28	16	2.8	142|355|834|836|847|857|1906|2308|2309|2353|2475|2936|3091|3569|4137|4313|4314|4353|4780|4846|5290|5599|5743|5970|6647|6648|7157|114548	PARP1|FAS|CASP1|CASP3|CAT|CAV1|EDN1|FOXO1|FOXO3|FOS|MTOR|GSR|HIF1A|IL6|MAPT|MMP2|MMP3|MPO|NFE2L2|NOS3|PIK3CA|MAPK8|PTGS2|RELA|SOD1|SOD2|TP53|NLRP3	-23	MyList
GO Biological Processes	19	GO:0050867	positive regulation of cell activation	19_GO:0032501 multicellular organismal process	-26	14	19	30284	392	172	31	18	2.9	207|596|857|920|1026|1803|2255|2309|2475|3458|3479|3553|3558|3569|3586|3606|4282|4317|4323|5290|5781|6352|6403|6850|7040|7048|7099|7124|7189|7412|114548	AKT1|BCL2|CAV1|CD4|CDKN1A|DPP4|FGF10|FOXO3|MTOR|IFNG|IGF1|IL1B|IL2|IL6|IL10|IL18|MIF|MMP8|MMP14|PIK3CA|PTPN11|CCL5|SELP|SYK|TGFB1|TGFBR2|TLR4|TNF|TRAF6|VCAM1|NLRP3	-23	MyList
GO Biological Processes	19	GO:0050863	regulation of T cell activation	19_GO:0002376 immune system process	-26	14	19	30284	395	172	31	18	2.9	207|673|836|857|920|1499|1511|1803|2064|2309|2475|3458|3479|3553|3558|3569|3586|3606|3726|3958|5290|5320|5781|6352|6647|6850|7040|7048|7189|7412|114548	AKT1|BRAF|CASP3|CAV1|CD4|CTNNB1|CTSG|DPP4|ERBB2|FOXO3|MTOR|IFNG|IGF1|IL1B|IL2|IL6|IL10|IL18|JUNB|LGALS3|PIK3CA|PLA2G2A|PTPN11|CCL5|SOD1|SYK|TGFB1|TGFBR2|TRAF6|VCAM1|NLRP3	-23	MyList
GO Biological Processes	19	GO:0050673	epithelial cell proliferation	19_GO:0009987 cellular process	-25	24	23	30284	177	172	24	14	2.6	367|581|595|857|1026|1499|1950|1956|2099|2191|2247|2255|2263|3569|3815|4323|5594|5604|5894|6352|7040|7046|7124|7422	AR|BAX|CCND1|CAV1|CDKN1A|CTNNB1|EGF|EGFR|ESR1|FAP|FGF2|FGF10|FGFR2|IL6|KIT|MMP14|MAPK1|MAP2K1|RAF1|CCL5|TGFB1|TGFBR1|TNF|VEGFA	-23	MyList
GO Biological Processes	19	GO:1903131	mononuclear cell differentiation	19_GO:0032502 developmental process	-25	15	20	30284	360	172	30	17	2.9	142|581|596|673|841|920|1499|1513|2064|2353|2475|2908|3458|3558|3569|3586|3815|4318|5295|5468|6774|6850|6868|7040|7048|7099|7157|7189|7412|7422	PARP1|BAX|BCL2|BRAF|CASP8|CD4|CTNNB1|CTSK|ERBB2|FOS|MTOR|NR3C1|IFNG|IL2|IL6|IL10|KIT|MMP9|PIK3R1|PPARG|STAT3|SYK|ADAM17|TGFB1|TGFBR2|TLR4|TP53|TRAF6|VCAM1|VEGFA	-23	MyList
GO Biological Processes	19	GO:0009314	response to radiation	19_GO:0050896 response to stimulus	-25	13	19	30284	436	172	32	19	3	142|207|581|595|596|673|836|847|1026|1432|1788|1956|1991|2353|3091|3156|3627|3815|4312|4313|4314|4318|5295|5599|5970|6648|7040|7076|7124|7157|7412|27113	PARP1|AKT1|BAX|CCND1|BCL2|BRAF|CASP3|CAT|CDKN1A|MAPK14|DNMT3A|EGFR|ELANE|FOS|HIF1A|HMGCR|CXCL10|KIT|MMP1|MMP2|MMP3|MMP9|PIK3R1|MAPK8|RELA|SOD2|TGFB1|TIMP1|TNF|TP53|VCAM1|BBC3	-23	MyList
GO Biological Processes	19	GO:0043065	positive regulation of apoptotic process	19_GO:0048518 positive regulation of biological process	-25	11	18	30284	569	172	35	20	3.1	355|581|596|655|836|841|857|1499|1509|2191|2308|2309|2908|2932|3458|3569|3586|3725|4313|4318|5468|5599|5743|6352|6647|6648|6667|7040|7046|7099|7124|7157|8061|27113|407006	FAS|BAX|BCL2|BMP7|CASP3|CASP8|CAV1|CTNNB1|CTSD|FAP|FOXO1|FOXO3|NR3C1|GSK3B|IFNG|IL6|IL10|JUN|MMP2|MMP9|PPARG|MAPK8|PTGS2|CCL5|SOD1|SOD2|SP1|TGFB1|TGFBR1|TLR4|TNF|TP53|FOSL1|BBC3|MIR221	-23	MyList
GO Biological Processes	19	GO:0032868	response to insulin	19_GO:0050896 response to stimulus	-25	18	21	30284	268	172	27	16	2.8	142|207|847|1432|1513|1956|2064|2260|2263|2308|2321|2353|2475|2932|3480|3586|3815|4233|5009|5290|5295|5468|5594|5894|5970|6667|6772	PARP1|AKT1|CAT|MAPK14|CTSK|EGFR|ERBB2|FGFR1|FGFR2|FOXO1|FLT1|FOS|MTOR|GSK3B|IGF1R|IL10|KIT|MET|OTC|PIK3CA|PIK3R1|PPARG|MAPK1|RAF1|RELA|SP1|STAT1	-23	MyList
GO Biological Processes	19	GO:0002696	positive regulation of leukocyte activation	19_GO:0002376 immune system process	-25	14	19	30284	372	172	30	17	2.9	207|596|857|920|1026|1803|2255|2309|2475|3458|3479|3553|3558|3569|3586|3606|4282|4317|4323|5290|5781|6352|6850|7040|7048|7099|7124|7189|7412|114548	AKT1|BCL2|CAV1|CD4|CDKN1A|DPP4|FGF10|FOXO3|MTOR|IFNG|IGF1|IL1B|IL2|IL6|IL10|IL18|MIF|MMP8|MMP14|PIK3CA|PTPN11|CCL5|SYK|TGFB1|TGFBR2|TLR4|TNF|TRAF6|VCAM1|NLRP3	-23	MyList
GO Biological Processes	19	GO:0022409	positive regulation of cell-cell adhesion	19_GO:0048518 positive regulation of biological process	-25	15	20	30284	337	172	29	17	2.9	207|240|655|857|920|1511|1803|1991|2309|2475|3458|3479|3553|3558|3569|3586|3606|5290|5781|5970|6352|6403|6850|7040|7048|7124|7189|7412|114548	AKT1|ALOX5|BMP7|CAV1|CD4|CTSG|DPP4|ELANE|FOXO3|MTOR|IFNG|IGF1|IL1B|IL2|IL6|IL10|IL18|PIK3CA|PTPN11|RELA|CCL5|SELP|SYK|TGFB1|TGFBR2|TNF|TRAF6|VCAM1|NLRP3	-23	MyList
GO Biological Processes	19	GO:0050679	positive regulation of epithelial cell proliferation	19_GO:0048518 positive regulation of biological process	-25	20	21	30284	218	172	25	15	2.7	207|367|595|1499|1950|1956|2064|2247|2255|2260|2263|3091|3479|3586|4321|5578|6352|6387|6667|6774|6868|7040|7046|7124|7422	AKT1|AR|CCND1|CTNNB1|EGF|EGFR|ERBB2|FGF2|FGF10|FGFR1|FGFR2|HIF1A|IGF1|IL10|MMP12|PRKCA|CCL5|CXCL12|SP1|STAT3|ADAM17|TGFB1|TGFBR1|TNF|VEGFA	-22	MyList
GO Biological Processes	19	GO:1903706	regulation of hemopoiesis	19_GO:0002376 immune system process	-24	13	18	30284	436	172	31	18	2.9	673|841|920|1385|1432|1499|2064|2309|2353|2475|3091|3458|3558|3586|3606|3726|4323|4792|5295|5578|6647|6772|6774|6850|7040|7048|7099|7124|7189|114548|407006	BRAF|CASP8|CD4|CREB1|MAPK14|CTNNB1|ERBB2|FOXO3|FOS|MTOR|HIF1A|IFNG|IL2|IL10|IL18|JUNB|MMP14|NFKBIA|PIK3R1|PRKCA|SOD1|STAT1|STAT3|SYK|TGFB1|TGFBR2|TLR4|TNF|TRAF6|NLRP3|MIR221	-22	MyList
GO Biological Processes	19	GO:0030879	mammary gland development	19_GO:0032502 developmental process	-24	29	24	30284	127	172	21	12	2.5	207|367|581|595|857|1385|1588|1950|2099|2247|2255|2263|2908|3091|4790|5241|5594|7040|7048|7422|7498	AKT1|AR|BAX|CCND1|CAV1|CREB1|CYP19A1|EGF|ESR1|FGF2|FGF10|FGFR2|NR3C1|HIF1A|NFKB1|PGR|MAPK1|TGFB1|TGFBR2|VEGFA|XDH	-22	MyList
GO Biological Processes	19	GO:2000379	positive regulation of reactive oxygen species metabolic process	19_GO:0048518 positive regulation of biological process	-24	42	27	30284	75	172	18	10	2.3	355|1026|1432|1645|1956|2147|2309|2950|4137|4780|6647|6648|6850|7040|7048|7099|7157|7498	FAS|CDKN1A|MAPK14|AKR1C1|EGFR|F2|FOXO3|GSTP1|MAPT|NFE2L2|SOD1|SOD2|SYK|TGFB1|TGFBR2|TLR4|TP53|XDH	-22	MyList
GO Biological Processes	19	GO:0051251	positive regulation of lymphocyte activation	19_GO:0002376 immune system process	-24	15	19	30284	337	172	28	16	2.8	207|596|857|920|1026|1803|2255|2309|2475|3458|3479|3553|3558|3569|3586|3606|4282|4323|5290|5781|6352|6850|7040|7048|7099|7189|7412|114548	AKT1|BCL2|CAV1|CD4|CDKN1A|DPP4|FGF10|FOXO3|MTOR|IFNG|IGF1|IL1B|IL2|IL6|IL10|IL18|MIF|MMP14|PIK3CA|PTPN11|CCL5|SYK|TGFB1|TGFBR2|TLR4|TRAF6|VCAM1|NLRP3	-22	MyList
GO Biological Processes	19	GO:0008285	negative regulation of cell population proliferation	19_GO:0048519 negative regulation of biological process	-24	8.4	16	30284	795	172	38	22	3.2	240|367|581|596|655|836|857|1026|1499|2064|2191|2247|2255|2263|2321|2950|3458|3553|3558|3569|3586|4846|5320|5468|5604|5728|5743|5894|6648|6772|6774|7040|7046|7124|7157|7498|8061|407006	ALOX5|AR|BAX|BCL2|BMP7|CASP3|CAV1|CDKN1A|CTNNB1|ERBB2|FAP|FGF2|FGF10|FGFR2|FLT1|GSTP1|IFNG|IL1B|IL2|IL6|IL10|NOS3|PLA2G2A|PPARG|MAP2K1|PTEN|PTGS2|RAF1|SOD2|STAT1|STAT3|TGFB1|TGFBR1|TNF|TP53|XDH|FOSL1|MIR221	-21	MyList
GO Biological Processes	19	GO:0070663	regulation of leukocyte proliferation	19_GO:0050789 regulation of biological process	-24	17	20	30284	273	172	26	15	2.7	196|596|836|1026|1499|2064|2255|2950|3479|3553|3558|3569|3586|3606|3815|3958|4282|5320|5594|6352|6850|7040|7048|7099|7189|7412	AHR|BCL2|CASP3|CDKN1A|CTNNB1|ERBB2|FGF10|GSTP1|IGF1|IL1B|IL2|IL6|IL10|IL18|KIT|LGALS3|MIF|PLA2G2A|MAPK1|CCL5|SYK|TGFB1|TGFBR2|TLR4|TRAF6|VCAM1	-21	MyList
GO Biological Processes	19	GO:0001819	positive regulation of cytokine production	19_GO:0032501 multicellular organismal process	-23	11	17	30284	514	172	32	19	3	834|841|920|1432|1991|3091|3458|3553|3558|3569|3586|3606|3815|4282|4317|4321|4843|5294|5295|5743|5781|5970|6647|6772|6774|6850|6868|7040|7099|7124|7189|114548	CASP1|CASP8|CD4|MAPK14|ELANE|HIF1A|IFNG|IL1B|IL2|IL6|IL10|IL18|KIT|MIF|MMP8|MMP12|NOS2|PIK3CG|PIK3R1|PTGS2|PTPN11|RELA|SOD1|STAT1|STAT3|SYK|ADAM17|TGFB1|TLR4|TNF|TRAF6|NLRP3	-21	MyList
GO Biological Processes	19	GO:1903039	positive regulation of leukocyte cell-cell adhesion	19_GO:0048518 positive regulation of biological process	-23	16	19	30284	285	172	26	15	2.7	207|240|857|920|1803|1991|2309|2475|3458|3479|3553|3558|3569|3606|5290|5781|5970|6352|6403|6850|7040|7048|7124|7189|7412|114548	AKT1|ALOX5|CAV1|CD4|DPP4|ELANE|FOXO3|MTOR|IFNG|IGF1|IL1B|IL2|IL6|IL18|PIK3CA|PTPN11|RELA|CCL5|SELP|SYK|TGFB1|TGFBR2|TNF|TRAF6|VCAM1|NLRP3	-21	MyList
GO Biological Processes	19	GO:0032102	negative regulation of response to external stimulus	19_GO:0048519 negative regulation of biological process	-23	12	17	30284	445	172	30	17	2.9	142|196|240|1432|1588|1803|1906|1991|2147|2247|2950|3479|3558|3586|4282|4321|4790|4846|5327|5328|5468|5728|6647|6774|6850|7040|7124|10062|114548|407006	PARP1|AHR|ALOX5|MAPK14|CYP19A1|DPP4|EDN1|ELANE|F2|FGF2|GSTP1|IGF1|IL2|IL10|MIF|MMP12|NFKB1|NOS3|PLAT|PLAU|PPARG|PTEN|SOD1|STAT3|SYK|TGFB1|TNF|NR1H3|NLRP3|MIR221	-21	MyList
GO Biological Processes	19	GO:0080135	regulation of cellular response to stress	19_GO:0050896 response to stimulus	-23	11	17	30284	535	172	32	19	3	142|207|240|355|581|596|655|673|857|1788|1956|2255|2308|2475|2932|2950|3309|3480|4137|4282|4323|4780|5295|5594|5604|5743|6387|7099|7157|10062|27113|407006	PARP1|AKT1|ALOX5|FAS|BAX|BCL2|BMP7|BRAF|CAV1|DNMT3A|EGFR|FGF10|FOXO1|MTOR|GSK3B|GSTP1|HSPA5|IGF1R|MAPT|MIF|MMP14|NFE2L2|PIK3R1|MAPK1|MAP2K1|PTGS2|CXCL12|TLR4|TP53|NR1H3|BBC3|MIR221	-21	MyList
GO Biological Processes	19	GO:1902532	negative regulation of intracellular signal transduction	19_GO:0048519 negative regulation of biological process	-23	8.6	16	30284	736	172	36	21	3.1	142|207|596|655|841|857|1432|1499|2099|2247|2308|2475|2932|2950|3091|3309|3480|3553|3586|4233|4282|4314|4318|4780|4792|5468|5728|5743|5970|6387|6648|6772|7099|7498|114548|407006	PARP1|AKT1|BCL2|BMP7|CASP8|CAV1|MAPK14|CTNNB1|ESR1|FGF2|FOXO1|MTOR|GSK3B|GSTP1|HIF1A|HSPA5|IGF1R|IL1B|IL10|MET|MIF|MMP3|MMP9|NFE2L2|NFKBIA|PPARG|PTEN|PTGS2|RELA|CXCL12|SOD2|STAT1|TLR4|XDH|NLRP3|MIR221	-20	MyList
GO Biological Processes	19	GO:0050778	positive regulation of immune response	19_GO:0002376 immune system process	-23	9	16	30284	684	172	35	20	3.1	581|596|673|715|716|834|857|920|1511|1520|1991|3458|3551|3553|3558|3569|3586|3606|4321|4790|4792|4843|5290|5594|5599|5970|6352|6850|7040|7099|7124|7189|8061|10062|114548	BAX|BCL2|BRAF|C1R|C1S|CASP1|CAV1|CD4|CTSG|CTSS|ELANE|IFNG|IKBKB|IL1B|IL2|IL6|IL10|IL18|MMP12|NFKB1|NFKBIA|NOS2|PIK3CA|MAPK1|MAPK8|RELA|CCL5|SYK|TGFB1|TLR4|TNF|TRAF6|FOSL1|NR1H3|NLRP3	-20	MyList
GO Biological Processes	19	GO:0034612	response to tumor necrosis factor	19_GO:0050896 response to stimulus	-22	21	21	30284	181	172	22	13	2.5	207|355|836|841|1432|1513|1906|2167|2309|2353|3551|4780|4790|4792|5594|5743|5970|6352|6772|7124|7157|7412	AKT1|FAS|CASP3|CASP8|MAPK14|CTSK|EDN1|FABP4|FOXO3|FOS|IKBKB|NFE2L2|NFKB1|NFKBIA|MAPK1|PTGS2|RELA|CCL5|STAT1|TNF|TP53|VCAM1	-20	MyList
GO Biological Processes	19	GO:0042063	gliogenesis	19_GO:0032502 developmental process	-22	16	19	30284	275	172	25	15	2.7	207|1000|1499|1956|2064|2247|2255|2475|2908|3458|3553|4137|4323|5594|5604|5728|5781|5894|6647|6774|7040|7099|7124|7157|7431	AKT1|CDH2|CTNNB1|EGFR|ERBB2|FGF2|FGF10|MTOR|NR3C1|IFNG|IL1B|MAPT|MMP14|MAPK1|MAP2K1|PTEN|PTPN11|RAF1|SOD1|STAT3|TGFB1|TLR4|TNF|TP53|VIM	-20	MyList
GO Biological Processes	19	GO:0097305	response to alcohol	19_GO:0050896 response to stimulus	-22	16	19	30284	275	172	25	15	2.7	142|196|207|841|847|1026|1385|1499|1513|1646|1788|2247|2263|2309|2353|3480|3558|6647|6648|7040|7046|7048|7124|7412|8061	PARP1|AHR|AKT1|CASP8|CAT|CDKN1A|CREB1|CTNNB1|CTSK|AKR1C2|DNMT3A|FGF2|FGFR2|FOXO3|FOS|IGF1R|IL2|SOD1|SOD2|TGFB1|TGFBR1|TGFBR2|TNF|VCAM1|FOSL1	-20	MyList
GO Biological Processes	19	GO:0010001	glial cell differentiation	19_GO:0032502 developmental process	-22	19	20	30284	216	172	23	13	2.6	207|1000|1499|1956|2064|2247|2255|2475|2908|3458|3553|4137|5594|5604|5728|5781|5894|6647|6774|7040|7099|7124|7431	AKT1|CDH2|CTNNB1|EGFR|ERBB2|FGF2|FGF10|MTOR|NR3C1|IFNG|IL1B|MAPT|MAPK1|MAP2K1|PTEN|PTPN11|RAF1|SOD1|STAT3|TGFB1|TLR4|TNF|VIM	-20	MyList
GO Biological Processes	19	GO:0040008	regulation of growth	19_GO:0040007 growth	-22	9.4	16	30284	616	172	33	19	3	207|367|596|627|1026|1385|1432|1906|1956|2064|2100|2147|2247|2260|2263|2475|2932|3091|3479|3558|4137|4323|5290|5728|6387|6647|6774|6868|7040|7046|7157|7422|27113	AKT1|AR|BCL2|BDNF|CDKN1A|CREB1|MAPK14|EDN1|EGFR|ERBB2|ESR2|F2|FGF2|FGFR1|FGFR2|MTOR|GSK3B|HIF1A|IGF1|IL2|MAPT|MMP14|PIK3CA|PTEN|CXCL12|SOD1|STAT3|ADAM17|TGFB1|TGFBR1|TP53|VEGFA|BBC3	-20	MyList
GO Biological Processes	19	GO:0071453	cellular response to oxygen levels	19_GO:0050896 response to stimulus	-22	22	21	30284	165	172	21	12	2.5	207|355|596|655|857|875|1788|1906|2263|2308|2309|2353|2475|3091|4780|5468|5743|7040|7157|7422|27113	AKT1|FAS|BCL2|BMP7|CAV1|CBS|DNMT3A|EDN1|FGFR2|FOXO1|FOXO3|FOS|MTOR|HIF1A|NFE2L2|PPARG|PTGS2|TGFB1|TP53|VEGFA|BBC3	-20	MyList
GO Biological Processes	19	GO:0042060	wound healing	19_GO:0050896 response to stimulus	-21	14	18	30284	335	172	26	15	2.7	308|1026|1432|1511|2064|2147|2247|2255|3091|3479|3569|3685|4321|5265|5290|5294|5327|5328|5894|6850|6868|7040|7046|7076|7099|7422	ANXA5|CDKN1A|MAPK14|CTSG|ERBB2|F2|FGF2|FGF10|HIF1A|IGF1|IL6|ITGAV|MMP12|SERPINA1|PIK3CA|PIK3CG|PLAT|PLAU|RAF1|SYK|ADAM17|TGFB1|TGFBR1|TIMP1|TLR4|VEGFA	-19	MyList
GO Biological Processes	19	GO:0022612	gland morphogenesis	19_GO:0032502 developmental process	-21	30	23	30284	105	172	18	10	2.3	367|581|596|655|857|1956|2099|2255|2260|2263|2908|3569|4313|4790|5241|7040|7048|7124	AR|BAX|BCL2|BMP7|CAV1|EGFR|ESR1|FGF10|FGFR1|FGFR2|NR3C1|IL6|MMP2|NFKB1|PGR|TGFB1|TGFBR2|TNF	-19	MyList
GO Biological Processes	19	GO:0001936	regulation of endothelial cell proliferation	19_GO:0050789 regulation of biological process	-21	21	20	30284	180	172	21	12	2.5	207|240|857|1950|2247|2255|2260|2321|3091|3586|5468|5578|6387|6667|6772|6774|6868|7046|7124|7422|7498	AKT1|ALOX5|CAV1|EGF|FGF2|FGF10|FGFR1|FLT1|HIF1A|IL10|PPARG|PRKCA|CXCL12|SP1|STAT1|STAT3|ADAM17|TGFBR1|TNF|VEGFA|XDH	-19	MyList
GO Biological Processes	19	GO:0050900	leukocyte migration	19_GO:0002376 immune system process	-21	17	19	30284	241	172	23	13	2.6	240|1511|1991|2321|3553|3569|3586|3627|3815|3958|4313|5175|5294|5295|6352|6367|6387|6403|6850|7124|7412|7422|54210	ALOX5|CTSG|ELANE|FLT1|IL1B|IL6|IL10|CXCL10|KIT|LGALS3|MMP2|PECAM1|PIK3CG|PIK3R1|CCL5|CCL22|CXCL12|SELP|SYK|TNF|VCAM1|VEGFA|TREM1	-19	MyList
GO Biological Processes	19	GO:0050670	regulation of lymphocyte proliferation	19_GO:0002376 immune system process	-21	17	19	30284	243	172	23	13	2.6	196|596|836|1026|1499|2064|2255|3479|3553|3558|3569|3586|3606|3958|4282|5320|6352|6850|7040|7048|7099|7189|7412	AHR|BCL2|CASP3|CDKN1A|CTNNB1|ERBB2|FGF10|IGF1|IL1B|IL2|IL6|IL10|IL18|LGALS3|MIF|PLA2G2A|CCL5|SYK|TGFB1|TGFBR2|TLR4|TRAF6|VCAM1	-19	MyList
GO Biological Processes	19	GO:0051896	regulation of phosphatidylinositol 3-kinase/protein kinase B signal transduction	19_GO:0050896 response to stimulus	-21	15	18	30284	278	172	24	14	2.6	847|1646|1950|1956|2147|2247|2260|2321|2475|3479|3480|3606|3815|4314|5290|5294|5728|6352|6403|7040|7046|7124|7422|7498	CAT|AKR1C2|EGF|EGFR|F2|FGF2|FGFR1|FLT1|MTOR|IGF1|IGF1R|IL18|KIT|MMP3|PIK3CA|PIK3CG|PTEN|CCL5|SELP|TGFB1|TGFBR1|TNF|VEGFA|XDH	-19	MyList
GO Biological Processes	19	GO:0009411	response to UV	19_GO:0050896 response to stimulus	-21	22	20	30284	157	172	20	12	2.4	142|207|581|595|596|836|847|1026|1432|1956|1991|4312|4313|4314|4318|5295|5599|5970|7076|7157	PARP1|AKT1|BAX|CCND1|BCL2|CASP3|CAT|CDKN1A|MAPK14|EGFR|ELANE|MMP1|MMP2|MMP3|MMP9|PIK3R1|MAPK8|RELA|TIMP1|TP53	-19	MyList
GO Biological Processes	19	GO:0032944	regulation of mononuclear cell proliferation	19_GO:0050789 regulation of biological process	-21	16	18	30284	248	172	23	13	2.6	196|596|836|1026|1499|2064|2255|3479|3553|3558|3569|3586|3606|3958|4282|5320|6352|6850|7040|7048|7099|7189|7412	AHR|BCL2|CASP3|CDKN1A|CTNNB1|ERBB2|FGF10|IGF1|IL1B|IL2|IL6|IL10|IL18|LGALS3|MIF|PLA2G2A|CCL5|SYK|TGFB1|TGFBR2|TLR4|TRAF6|VCAM1	-18	MyList
GO Biological Processes	19	GO:0048729	tissue morphogenesis	19_GO:0032502 developmental process	-21	9.4	15	30284	579	172	31	18	2.9	367|596|655|760|836|1499|1906|1950|1956|2099|2247|2255|2260|2263|2821|2908|3091|3586|3685|4233|4313|4321|4323|4846|5241|6868|7040|7046|7048|7189|7422	AR|BCL2|BMP7|CA2|CASP3|CTNNB1|EDN1|EGF|EGFR|ESR1|FGF2|FGF10|FGFR1|FGFR2|GPI|NR3C1|HIF1A|IL10|ITGAV|MET|MMP2|MMP12|MMP14|NOS3|PGR|ADAM17|TGFB1|TGFBR1|TGFBR2|TRAF6|VEGFA	-18	MyList
GO Biological Processes	19	GO:0009416	response to light stimulus	19_GO:0050896 response to stimulus	-21	14	17	30284	320	172	25	15	2.7	142|207|581|595|596|673|836|847|1026|1432|1956|1991|2353|3091|3156|3815|4312|4313|4314|4318|5295|5599|5970|7076|7157	PARP1|AKT1|BAX|CCND1|BCL2|BRAF|CASP3|CAT|CDKN1A|MAPK14|EGFR|ELANE|FOS|HIF1A|HMGCR|KIT|MMP1|MMP2|MMP3|MMP9|PIK3R1|MAPK8|RELA|TIMP1|TP53	-18	MyList
GO Biological Processes	19	GO:0002573	myeloid leukocyte differentiation	19_GO:0032502 developmental process	-20	22	20	30284	161	172	20	12	2.4	142|841|920|1385|1432|1499|2353|2908|3458|3726|3815|4318|5295|5468|7040|7048|7099|7124|7189|7422	PARP1|CASP8|CD4|CREB1|MAPK14|CTNNB1|FOS|NR3C1|IFNG|JUNB|KIT|MMP9|PIK3R1|PPARG|TGFB1|TGFBR2|TLR4|TNF|TRAF6|VEGFA	-18	MyList
GO Biological Processes	19	GO:0051897	positive regulation of phosphatidylinositol 3-kinase/protein kinase B signal transduction	19_GO:0048518 positive regulation of biological process	-20	19	19	30284	190	172	21	12	2.5	847|1646|1950|1956|2147|2247|2260|2321|2475|3479|3480|3606|3815|5290|5294|6352|6403|7040|7046|7124|7422	CAT|AKR1C2|EGF|EGFR|F2|FGF2|FGFR1|FLT1|MTOR|IGF1|IGF1R|IL18|KIT|PIK3CA|PIK3CG|CCL5|SELP|TGFB1|TGFBR1|TNF|VEGFA	-18	MyList
GO Biological Processes	19	GO:0031349	positive regulation of defense response	19_GO:0048518 positive regulation of biological process	-20	11	16	30284	449	172	28	16	2.8	834|836|857|1520|2167|3458|3551|3553|3558|3569|3606|4317|4321|4792|5294|5320|5599|5743|5970|6352|6850|7040|7099|7124|7189|8061|10062|114548	CASP1|CASP3|CAV1|CTSS|FABP4|IFNG|IKBKB|IL1B|IL2|IL6|IL18|MMP8|MMP12|NFKBIA|PIK3CG|PLA2G2A|MAPK8|PTGS2|RELA|CCL5|SYK|TGFB1|TLR4|TNF|TRAF6|FOSL1|NR1H3|NLRP3	-18	MyList
GO Biological Processes	19	GO:0043523	regulation of neuron apoptotic process	19_GO:0050789 regulation of biological process	-20	16	18	30284	255	172	23	13	2.6	142|581|595|596|627|673|836|841|1499|2247|2309|2821|2908|2932|3091|3586|4313|5290|6647|6648|7124|7157|27113	PARP1|BAX|CCND1|BCL2|BDNF|BRAF|CASP3|CASP8|CTNNB1|FGF2|FOXO3|GPI|NR3C1|GSK3B|HIF1A|IL10|MMP2|PIK3CA|SOD1|SOD2|TNF|TP53|BBC3	-18	MyList
GO Biological Processes	19	GO:1903829	positive regulation of protein localization	19_GO:0051179 localization	-20	10	16	30284	499	172	29	17	2.9	142|207|1432|1906|1950|1956|2064|2147|2932|3091|3458|3479|3553|3958|4137|5175|5290|5295|5468|5578|5599|5743|6721|7040|7099|7124|7422|26229|27113	PARP1|AKT1|MAPK14|EDN1|EGF|EGFR|ERBB2|F2|GSK3B|HIF1A|IFNG|IGF1|IL1B|LGALS3|MAPT|PECAM1|PIK3CA|PIK3R1|PPARG|PRKCA|MAPK8|PTGS2|SREBF2|TGFB1|TLR4|TNF|VEGFA|B3GAT3|BBC3	-18	MyList
GO Biological Processes	19	GO:0070201	regulation of establishment of protein localization	19_GO:0051179 localization	-20	9.7	15	30284	547	172	30	17	2.9	240|1432|1509|1956|2064|2147|2308|2932|3091|3156|3458|3479|3553|3569|4137|4843|5295|5468|5578|5599|5743|5781|6352|6721|7040|7099|7124|10062|26229|27113	ALOX5|MAPK14|CTSD|EGFR|ERBB2|F2|FOXO1|GSK3B|HIF1A|HMGCR|IFNG|IGF1|IL1B|IL6|MAPT|NOS2|PIK3R1|PPARG|PRKCA|MAPK8|PTGS2|PTPN11|CCL5|SREBF2|TGFB1|TLR4|TNF|NR1H3|B3GAT3|BBC3	-18	MyList
GO Biological Processes	19	GO:0010817	regulation of hormone levels	19_GO:0065007 biological regulation	-20	9.6	15	30284	548	172	30	17	2.9	240|1385|1508|1511|1513|1559|1588|1645|1646|1803|1906|1956|2099|2147|2260|2308|2908|3091|3458|3480|3553|3569|4790|4843|5468|5578|5781|5894|6352|7124	ALOX5|CREB1|CTSB|CTSG|CTSK|CYP2C9|CYP19A1|AKR1C1|AKR1C2|DPP4|EDN1|EGFR|ESR1|F2|FGFR1|FOXO1|NR3C1|HIF1A|IFNG|IGF1R|IL1B|IL6|NFKB1|NOS2|PPARG|PRKCA|PTPN11|RAF1|CCL5|TNF	-18	MyList
GO Biological Processes	19	GO:0050878	regulation of body fluid levels	19_GO:0065007 biological regulation	-20	12	17	30284	370	172	26	15	2.7	308|595|857|1385|1432|1511|1906|1956|2147|2191|2255|2821|3091|3569|4780|4846|4883|5265|5290|5294|5327|5328|6850|7422|7498|10062	ANXA5|CCND1|CAV1|CREB1|MAPK14|CTSG|EDN1|EGFR|F2|FAP|FGF10|GPI|HIF1A|IL6|NFE2L2|NOS3|NPR3|SERPINA1|PIK3CA|PIK3CG|PLAT|PLAU|SYK|VEGFA|XDH|NR1H3	-18	MyList
GO Biological Processes	19	GO:1901342	regulation of vasculature development	19_GO:0032502 developmental process	-20	12	17	30284	372	172	26	15	2.7	240|1499|2064|2247|2321|3091|3553|3569|3586|3627|4780|4846|5294|5468|5578|5970|6387|6667|6772|6774|7040|7046|7048|7124|7422|407006	ALOX5|CTNNB1|ERBB2|FGF2|FLT1|HIF1A|IL1B|IL6|IL10|CXCL10|NFE2L2|NOS3|PIK3CG|PPARG|PRKCA|RELA|CXCL12|SP1|STAT1|STAT3|TGFB1|TGFBR1|TGFBR2|TNF|VEGFA|MIR221	-18	MyList
GO Biological Processes	19	GO:0032355	response to estradiol	19_GO:0050896 response to stimulus	-20	26	21	30284	120	172	18	10	2.3	655|836|841|847|1499|1588|1788|1956|2099|2100|2255|2821|3480|3586|4313|5743|6774|7040	BMP7|CASP3|CASP8|CAT|CTNNB1|CYP19A1|DNMT3A|EGFR|ESR1|ESR2|FGF10|GPI|IGF1R|IL10|MMP2|PTGS2|STAT3|TGFB1	-18	MyList
GO Biological Processes	19	GO:0002009	morphogenesis of an epithelium	19_GO:0032502 developmental process	-20	11	16	30284	462	172	28	16	2.8	367|596|655|760|836|1499|1906|1950|1956|2099|2247|2255|2260|2263|2908|3091|3586|3685|4233|4313|4321|4323|5241|6868|7040|7048|7189|7422	AR|BCL2|BMP7|CA2|CASP3|CTNNB1|EDN1|EGF|EGFR|ESR1|FGF2|FGF10|FGFR1|FGFR2|NR3C1|HIF1A|IL10|ITGAV|MET|MMP2|MMP12|MMP14|PGR|ADAM17|TGFB1|TGFBR2|TRAF6|VEGFA	-18	MyList
GO Biological Processes	19	GO:1902105	regulation of leukocyte differentiation	19_GO:0002376 immune system process	-20	13	17	30284	340	172	25	15	2.7	673|841|920|1385|1499|2064|2309|2353|2475|3458|3558|3586|3606|3726|4323|5295|5578|6647|6850|7040|7048|7099|7124|7189|114548	BRAF|CASP8|CD4|CREB1|CTNNB1|ERBB2|FOXO3|FOS|MTOR|IFNG|IL2|IL10|IL18|JUNB|MMP14|PIK3R1|PRKCA|SOD1|SYK|TGFB1|TGFBR2|TLR4|TNF|TRAF6|NLRP3	-18	MyList
GO Biological Processes	19	GO:0048009	insulin-like growth factor receptor signaling pathway	19_GO:0050896 response to stimulus	-20	35	23	30284	81	172	16	9.3	2.2	207|367|1956|2064|2260|2263|2321|3479|3480|3815|4233|5290|5295|5594|5604|5894	AKT1|AR|EGFR|ERBB2|FGFR1|FGFR2|FLT1|IGF1|IGF1R|KIT|MET|PIK3CA|PIK3R1|MAPK1|MAP2K1|RAF1	-18	MyList
GO Biological Processes	19	GO:0071407	cellular response to organic cyclic compound	19_GO:0050896 response to stimulus	-20	10	16	30284	472	172	28	16	2.8	196|207|367|836|841|857|1385|1499|1786|1788|1906|1956|2099|2100|2309|2908|2932|3480|3586|4313|4790|5241|5294|5594|5743|6667|6772|7040	AHR|AKT1|AR|CASP3|CASP8|CAV1|CREB1|CTNNB1|DNMT1|DNMT3A|EDN1|EGFR|ESR1|ESR2|FOXO3|NR3C1|GSK3B|IGF1R|IL10|MMP2|NFKB1|PGR|PIK3CG|MAPK1|PTGS2|SP1|STAT1|TGFB1	-18	MyList
GO Biological Processes	19	GO:0000302	response to reactive oxygen species	19_GO:0050896 response to stimulus	-20	20	19	30284	177	172	20	12	2.4	596|836|847|1906|2353|2950|3091|3569|4137|4313|4314|4353|4780|4846|5599|5970|6647|6648|6772|8061	BCL2|CASP3|CAT|EDN1|FOS|GSTP1|HIF1A|IL6|MAPT|MMP2|MMP3|MPO|NFE2L2|NOS3|MAPK8|RELA|SOD1|SOD2|STAT1|FOSL1	-18	MyList
GO Biological Processes	19	GO:0045321	leukocyte activation	19_GO:0002376 immune system process	-20	8.7	15	30284	626	172	31	18	2.9	581|596|673|841|920|1499|1511|1803|1906|2064|2475|3458|3558|3569|3586|3606|3815|4137|5294|5295|6352|6774|6850|6868|7040|7048|7099|7124|7157|7189|7412	BAX|BCL2|BRAF|CASP8|CD4|CTNNB1|CTSG|DPP4|EDN1|ERBB2|MTOR|IFNG|IL2|IL6|IL10|IL18|KIT|MAPT|PIK3CG|PIK3R1|CCL5|STAT3|SYK|ADAM17|TGFB1|TGFBR2|TLR4|TNF|TP53|TRAF6|VCAM1	-18	MyList
GO Biological Processes	19	GO:0002831	regulation of response to biotic stimulus	19_GO:0050896 response to stimulus	-20	9.2	15	30284	576	172	30	17	2.9	142|196|207|834|841|857|1520|2099|3551|3553|4282|4321|4780|4792|5295|5468|5578|5599|5781|5970|6352|6772|6850|7040|7099|7124|7189|8061|10062|114548	PARP1|AHR|AKT1|CASP1|CASP8|CAV1|CTSS|ESR1|IKBKB|IL1B|MIF|MMP12|NFE2L2|NFKBIA|PIK3R1|PPARG|PRKCA|MAPK8|PTPN11|RELA|CCL5|STAT1|SYK|TGFB1|TLR4|TNF|TRAF6|FOSL1|NR1H3|NLRP3	-18	MyList
GO Biological Processes	19	GO:0071356	cellular response to tumor necrosis factor	19_GO:0050896 response to stimulus	-19	22	19	30284	155	172	19	11	2.4	207|355|1432|1513|1906|2167|2309|2353|3551|4780|4790|4792|5594|5970|6352|6772|7124|7157|7412	AKT1|FAS|MAPK14|CTSK|EDN1|FABP4|FOXO3|FOS|IKBKB|NFE2L2|NFKB1|NFKBIA|MAPK1|RELA|CCL5|STAT1|TNF|TP53|VCAM1	-17	MyList
GO Biological Processes	19	GO:0010595	positive regulation of endothelial cell migration	19_GO:0040011 locomotion	-19	24	20	30284	133	172	18	10	2.3	207|1906|1950|2247|2260|2821|3091|4233|4780|4846|5294|5578|5743|6667|6868|7040|7422|407006	AKT1|EDN1|EGF|FGF2|FGFR1|GPI|HIF1A|MET|NFE2L2|NOS3|PIK3CG|PRKCA|PTGS2|SP1|ADAM17|TGFB1|VEGFA|MIR221	-17	MyList
GO Biological Processes	19	GO:0000165	MAPK cascade	19_GO:0050896 response to stimulus	-19	17	18	30284	221	172	21	12	2.5	367|673|857|1432|1499|1906|1950|1956|2247|2255|2260|3551|3553|3685|4790|5594|5599|5604|5894|7099|7124	AR|BRAF|CAV1|MAPK14|CTNNB1|EDN1|EGF|EGFR|FGF2|FGF10|FGFR1|IKBKB|IL1B|ITGAV|NFKB1|MAPK1|MAPK8|MAP2K1|RAF1|TLR4|TNF	-17	MyList
GO Biological Processes	19	GO:1901654	response to ketone	19_GO:0050896 response to stimulus	-19	17	18	30284	223	172	21	12	2.5	142|196|207|367|857|1026|1385|1646|1906|1956|2309|2353|2821|2908|3480|5290|5970|6667|7040|8061|10062	PARP1|AHR|AKT1|AR|CAV1|CDKN1A|CREB1|AKR1C2|EDN1|EGFR|FOXO3|FOS|GPI|NR3C1|IGF1R|PIK3CA|RELA|SP1|TGFB1|FOSL1|NR1H3	-17	MyList
GO Biological Processes	19	GO:0097190	apoptotic signaling pathway	19_GO:0050896 response to stimulus	-19	13	16	30284	332	172	24	14	2.6	355|581|596|836|841|857|1026|1499|2255|2309|2932|3458|3553|3558|3685|5295|5578|5894|6648|6850|7040|7124|7157|27113	FAS|BAX|BCL2|CASP3|CASP8|CAV1|CDKN1A|CTNNB1|FGF10|FOXO3|GSK3B|IFNG|IL1B|IL2|ITGAV|PIK3R1|PRKCA|RAF1|SOD2|SYK|TGFB1|TNF|TP53|BBC3	-17	MyList
GO Biological Processes	19	GO:0071902	positive regulation of protein serine/threonine kinase activity	19_GO:0048518 positive regulation of biological process	-19	26	20	30284	114	172	17	9.9	2.3	207|595|1906|1956|1991|2064|2247|2260|2321|3458|3553|5294|5604|6868|7099|7124|7189	AKT1|CCND1|EDN1|EGFR|ELANE|ERBB2|FGF2|FGFR1|FLT1|IFNG|IL1B|PIK3CG|MAP2K1|ADAM17|TLR4|TNF|TRAF6	-17	MyList
GO Biological Processes	19	GO:2001236	regulation of extrinsic apoptotic signaling pathway	19_GO:0050896 response to stimulus	-19	20	19	30284	165	172	19	11	2.4	207|367|596|857|2255|2260|2932|2950|3479|3553|3685|3958|4846|5894|5970|7046|7099|7124|407006	AKT1|AR|BCL2|CAV1|FGF10|FGFR1|GSK3B|GSTP1|IGF1|IL1B|ITGAV|LGALS3|NOS3|RAF1|RELA|TGFBR1|TLR4|TNF|MIR221	-17	MyList
GO Biological Processes	19	GO:1904645	response to amyloid-beta	19_GO:0050896 response to stimulus	-19	42	24	30284	58	172	14	8.1	2.1	142|2309|2932|3479|3480|4313|4314|4318|4321|4322|6850|7099|7124|7412	PARP1|FOXO3|GSK3B|IGF1|IGF1R|MMP2|MMP3|MMP9|MMP12|MMP13|SYK|TLR4|TNF|VCAM1	-17	MyList
GO Biological Processes	19	GO:0032869	cellular response to insulin stimulus	19_GO:0050896 response to stimulus	-19	18	18	30284	198	172	20	12	2.4	142|207|1956|2064|2260|2263|2308|2321|2475|2932|3480|3815|4233|5290|5295|5468|5594|5894|6667|6772	PARP1|AKT1|EGFR|ERBB2|FGFR1|FGFR2|FOXO1|FLT1|MTOR|GSK3B|IGF1R|KIT|MET|PIK3CA|PIK3R1|PPARG|MAPK1|RAF1|SP1|STAT1	-17	MyList
GO Biological Processes	19	GO:0030099	myeloid cell differentiation	19_GO:0032502 developmental process	-19	13	16	30284	305	172	23	13	2.6	142|836|841|920|1385|1432|1499|2353|2908|3458|3726|3815|4318|5295|5468|5781|7040|7048|7067|7099|7124|7189|7422	PARP1|CASP3|CASP8|CD4|CREB1|MAPK14|CTNNB1|FOS|NR3C1|IFNG|JUNB|KIT|MMP9|PIK3R1|PPARG|PTPN11|TGFB1|TGFBR2|THRA|TLR4|TNF|TRAF6|VEGFA	-17	MyList
GO Biological Processes	19	GO:0010038	response to metal ion	19_GO:0050896 response to stimulus	-18	12	16	30284	346	172	24	14	2.6	142|596|673|836|841|847|857|1385|1788|1906|1956|2167|2353|2821|3091|3726|3727|3815|4137|4780|5009|5743|6648|7412	PARP1|BCL2|BRAF|CASP3|CASP8|CAT|CAV1|CREB1|DNMT3A|EDN1|EGFR|FABP4|FOS|GPI|HIF1A|JUNB|JUND|KIT|MAPT|NFE2L2|OTC|PTGS2|SOD2|VCAM1	-16	MyList
GO Biological Processes	19	GO:0048871	multicellular organismal-level homeostasis	19_GO:0042592 homeostatic process	-18	8.3	14	30284	638	172	30	17	2.9	207|355|581|596|836|1000|1432|1499|1513|2308|2821|3091|3553|3569|3815|4846|5175|5290|5320|5599|5743|5781|6647|6648|6774|7040|7067|7099|7189|7422	AKT1|FAS|BAX|BCL2|CASP3|CDH2|MAPK14|CTNNB1|CTSK|FOXO1|GPI|HIF1A|IL1B|IL6|KIT|NOS3|PECAM1|PIK3CA|PLA2G2A|MAPK8|PTGS2|PTPN11|SOD1|SOD2|STAT3|TGFB1|THRA|TLR4|TRAF6|VEGFA	-16	MyList
GO Biological Processes	19	GO:0022617	extracellular matrix disassembly	19_GO:0009987 cellular process	-18	49	25	30284	47	172	13	7.6	2	1511|1513|1520|1991|4312|4313|4314|4316|4317|4318|4321|4322|4323	CTSG|CTSK|CTSS|ELANE|MMP1|MMP2|MMP3|MMP7|MMP8|MMP9|MMP12|MMP13|MMP14	-16	MyList
GO Biological Processes	19	GO:0036294	cellular response to decreased oxygen levels	19_GO:0050896 response to stimulus	-18	21	19	30284	149	172	18	10	2.3	207|596|655|875|1788|1906|2263|2309|2353|2475|3091|4780|5468|5743|7040|7157|7422|27113	AKT1|BCL2|BMP7|CBS|DNMT3A|EDN1|FGFR2|FOXO3|FOS|MTOR|HIF1A|NFE2L2|PPARG|PTGS2|TGFB1|TP53|VEGFA|BBC3	-16	MyList
GO Biological Processes	19	GO:0035994	response to muscle stretch	19_GO:0050896 response to stimulus	-18	77	29	30284	25	172	11	6.4	1.9	1000|1432|1499|1906|2353|2821|4790|4792|5290|5894|5970	CDH2|MAPK14|CTNNB1|EDN1|FOS|GPI|NFKB1|NFKBIA|PIK3CA|RAF1|RELA	-16	MyList
GO Biological Processes	19	GO:0030855	epithelial cell differentiation	19_GO:0032502 developmental process	-18	8.2	14	30284	646	172	30	17	2.9	207|367|655|836|857|1000|1026|1385|1499|1508|1645|1646|1906|2099|2247|2255|2260|2263|3091|3958|4233|5175|5241|5468|5604|6647|7040|7067|7422|7431	AKT1|AR|BMP7|CASP3|CAV1|CDH2|CDKN1A|CREB1|CTNNB1|CTSB|AKR1C1|AKR1C2|EDN1|ESR1|FGF2|FGF10|FGFR1|FGFR2|HIF1A|LGALS3|MET|PECAM1|PGR|PPARG|MAP2K1|SOD1|TGFB1|THRA|VEGFA|VIM	-16	MyList
GO Biological Processes	19	GO:0045860	positive regulation of protein kinase activity	19_GO:0048518 positive regulation of biological process	-18	17	17	30284	210	172	20	12	2.4	207|595|920|1026|1906|1956|1991|2064|2247|2260|2321|3458|3479|3553|5294|5604|6868|7099|7124|7189	AKT1|CCND1|CD4|CDKN1A|EDN1|EGFR|ELANE|ERBB2|FGF2|FGFR1|FLT1|IFNG|IGF1|IL1B|PIK3CG|MAP2K1|ADAM17|TLR4|TNF|TRAF6	-16	MyList
GO Biological Processes	19	GO:2001237	negative regulation of extrinsic apoptotic signaling pathway	19_GO:0048519 negative regulation of biological process	-18	28	20	30284	102	172	16	9.3	2.2	207|367|596|2255|2932|2950|3479|3553|3685|3958|4846|5894|5970|7046|7124|407006	AKT1|AR|BCL2|FGF10|GSK3B|GSTP1|IGF1|IL1B|ITGAV|LGALS3|NOS3|RAF1|RELA|TGFBR1|TNF|MIR221	-16	MyList
GO Biological Processes	19	GO:1903034	regulation of response to wounding	19_GO:0050896 response to stimulus	-18	18	18	30284	181	172	19	11	2.4	240|673|857|1906|2147|2191|2247|2475|3480|3586|4780|4846|5327|5328|5604|5728|6774|7124|407006	ALOX5|BRAF|CAV1|EDN1|F2|FAP|FGF2|MTOR|IGF1R|IL10|NFE2L2|NOS3|PLAT|PLAU|MAP2K1|PTEN|STAT3|TNF|MIR221	-16	MyList
GO Biological Processes	19	GO:0071900	regulation of protein serine/threonine kinase activity	19_GO:0050789 regulation of biological process	-18	16	17	30284	217	172	20	12	2.4	207|595|1026|1906|1956|1991|2064|2247|2260|2321|2950|3458|3553|5294|5604|5728|6868|7099|7124|7189	AKT1|CCND1|CDKN1A|EDN1|EGFR|ELANE|ERBB2|FGF2|FGFR1|FLT1|GSTP1|IFNG|IL1B|PIK3CG|MAP2K1|PTEN|ADAM17|TLR4|TNF|TRAF6	-16	MyList
GO Biological Processes	19	GO:0045637	regulation of myeloid cell differentiation	19_GO:0002376 immune system process	-18	16	17	30284	220	172	20	12	2.4	841|920|1385|1432|1499|2309|2353|2475|3091|3458|4792|5295|5578|6772|6774|7040|7099|7124|7189|407006	CASP8|CD4|CREB1|MAPK14|CTNNB1|FOXO3|FOS|MTOR|HIF1A|IFNG|NFKBIA|PIK3R1|PRKCA|STAT1|STAT3|TGFB1|TLR4|TNF|TRAF6|MIR221	-16	MyList
GO Biological Processes	19	GO:2001242	regulation of intrinsic apoptotic signaling pathway	19_GO:0050896 response to stimulus	-18	18	17	30284	189	172	19	11	2.4	142|207|581|596|857|1499|2247|3091|3586|4282|4313|4318|4780|5743|6387|6647|6648|7157|27113	PARP1|AKT1|BAX|BCL2|CAV1|CTNNB1|FGF2|HIF1A|IL10|MIF|MMP2|MMP9|NFE2L2|PTGS2|CXCL12|SOD1|SOD2|TP53|BBC3	-16	MyList
GO Biological Processes	19	GO:0051129	negative regulation of cellular component organization	19_GO:0048519 negative regulation of biological process	-18	7.5	13	30284	730	172	31	18	2.9	142|207|367|655|857|1803|2191|2475|2932|3309|3479|3551|3553|3627|3685|3958|4137|4233|4323|5290|5295|5468|5728|5894|7040|7067|7124|7157|7422|7431|10062	PARP1|AKT1|AR|BMP7|CAV1|DPP4|FAP|MTOR|GSK3B|HSPA5|IGF1|IKBKB|IL1B|CXCL10|ITGAV|LGALS3|MAPT|MET|MMP14|PIK3CA|PIK3R1|PPARG|PTEN|RAF1|TGFB1|THRA|TNF|TP53|VEGFA|VIM|NR1H3	-16	MyList
GO Biological Processes	19	GO:0033674	positive regulation of kinase activity	19_GO:0048518 positive regulation of biological process	-18	16	17	30284	223	172	20	12	2.4	207|595|920|1026|1906|1956|1991|2064|2247|2260|2321|3458|3479|3553|5294|5604|6868|7099|7124|7189	AKT1|CCND1|CD4|CDKN1A|EDN1|EGFR|ELANE|ERBB2|FGF2|FGFR1|FLT1|IFNG|IGF1|IL1B|PIK3CG|MAP2K1|ADAM17|TLR4|TNF|TRAF6	-16	MyList
GO Biological Processes	19	GO:0070372	regulation of ERK1 and ERK2 cascade	19_GO:0050896 response to stimulus	-18	13	16	30284	296	172	22	13	2.5	673|920|1956|2064|2247|2255|2263|2950|3156|3479|3553|4282|5320|5578|5604|5781|6850|7040|7099|7124|7422|407006	BRAF|CD4|EGFR|ERBB2|FGF2|FGF10|FGFR2|GSTP1|HMGCR|IGF1|IL1B|MIF|PLA2G2A|PRKCA|MAP2K1|PTPN11|SYK|TGFB1|TLR4|TNF|VEGFA|MIR221	-16	MyList
GO Biological Processes	19	GO:0045927	positive regulation of growth	19_GO:0040007 growth	-18	14	16	30284	259	172	21	12	2.5	207|596|627|1385|1432|1906|1956|2064|2147|2247|2260|2263|2475|3479|3558|4137|4323|6387|6868|7046|7422	AKT1|BCL2|BDNF|CREB1|MAPK14|EDN1|EGFR|ERBB2|F2|FGF2|FGFR1|FGFR2|MTOR|IGF1|IL2|MAPT|MMP14|CXCL12|ADAM17|TGFBR1|VEGFA	-16	MyList
GO Biological Processes	19	GO:0060322	head development	19_GO:0032502 developmental process	-18	7.1	13	30284	795	172	32	19	3	581|596|655|673|836|875|1000|1385|1499|1950|1956|2247|2255|2260|2263|2309|2353|2932|3091|3309|3480|4313|4323|5594|5604|5728|5781|5894|6387|7040|7048|7157	BAX|BCL2|BMP7|BRAF|CASP3|CBS|CDH2|CREB1|CTNNB1|EGF|EGFR|FGF2|FGF10|FGFR1|FGFR2|FOXO3|FOS|GSK3B|HIF1A|HSPA5|IGF1R|MMP2|MMP14|MAPK1|MAP2K1|PTEN|PTPN11|RAF1|CXCL12|TGFB1|TGFBR2|TP53	-16	MyList
GO Biological Processes	19	GO:0051046	regulation of secretion	19_GO:0051179 localization	-18	8.2	14	30284	626	172	29	17	2.9	240|673|1385|1588|1906|1950|1956|2147|2255|2260|2308|3091|3156|3458|3479|3553|3569|4282|4843|5468|5578|5781|6352|6387|6850|7040|7099|7124|10062	ALOX5|BRAF|CREB1|CYP19A1|EDN1|EGF|EGFR|F2|FGF10|FGFR1|FOXO1|HIF1A|HMGCR|IFNG|IGF1|IL1B|IL6|MIF|NOS2|PPARG|PRKCA|PTPN11|CCL5|CXCL12|SYK|TGFB1|TLR4|TNF|NR1H3	-16	MyList
GO Biological Processes	19	GO:0050870	positive regulation of T cell activation	19_GO:0002376 immune system process	-18	14	16	30284	261	172	21	12	2.5	207|857|920|1803|2309|2475|3458|3479|3553|3558|3569|3606|5290|5781|6352|6850|7040|7048|7189|7412|114548	AKT1|CAV1|CD4|DPP4|FOXO3|MTOR|IFNG|IGF1|IL1B|IL2|IL6|IL18|PIK3CA|PTPN11|CCL5|SYK|TGFB1|TGFBR2|TRAF6|VCAM1|NLRP3	-16	MyList
GO Biological Processes	19	GO:0034599	cellular response to oxidative stress	19_GO:0050896 response to stimulus	-17	16	17	30284	227	172	20	12	2.4	142|847|1906|2308|2309|2353|2936|3091|3569|4137|4313|4314|4353|4780|4846|5599|5970|6647|6648|7157	PARP1|CAT|EDN1|FOXO1|FOXO3|FOS|GSR|HIF1A|IL6|MAPT|MMP2|MMP3|MPO|NFE2L2|NOS3|MAPK8|RELA|SOD1|SOD2|TP53	-16	MyList
GO Biological Processes	19	GO:0038127	ERBB signaling pathway	19_GO:0050896 response to stimulus	-17	25	19	30284	112	172	16	9.3	2.2	207|673|1950|1956|2064|2260|2263|2321|3480|3815|4233|5290|5594|5604|5781|5894	AKT1|BRAF|EGF|EGFR|ERBB2|FGFR1|FGFR2|FLT1|IGF1R|KIT|MET|PIK3CA|MAPK1|MAP2K1|PTPN11|RAF1	-16	MyList
GO Biological Processes	19	GO:0051347	positive regulation of transferase activity	19_GO:0065007 biological regulation	-17	14	16	30284	264	172	21	12	2.5	207|595|920|1026|1906|1956|1991|2064|2247|2260|2321|3458|3479|3553|5294|5604|5728|6868|7099|7124|7189	AKT1|CCND1|CD4|CDKN1A|EDN1|EGFR|ELANE|ERBB2|FGF2|FGFR1|FLT1|IFNG|IGF1|IL1B|PIK3CG|MAP2K1|PTEN|ADAM17|TLR4|TNF|TRAF6	-15	MyList
GO Biological Processes	19	GO:0061138	morphogenesis of a branching epithelium	19_GO:0032502 developmental process	-17	19	18	30284	168	172	18	10	2.3	367|596|655|1499|1906|1950|2099|2247|2255|2260|2263|3586|4233|4323|5241|7040|7048|7422	AR|BCL2|BMP7|CTNNB1|EDN1|EGF|ESR1|FGF2|FGF10|FGFR1|FGFR2|IL10|MET|MMP14|PGR|TGFB1|TGFBR2|VEGFA	-15	MyList
GO Biological Processes	19	GO:0030574	collagen catabolic process	19_GO:0009987 cellular process	-17	52	24	30284	41	172	12	7	1.9	1508|1513|1520|4312|4313|4314|4316|4317|4318|4321|4322|4323	CTSB|CTSK|CTSS|MMP1|MMP2|MMP3|MMP7|MMP8|MMP9|MMP12|MMP13|MMP14	-15	MyList
GO Biological Processes	19	GO:0035924	cellular response to vascular endothelial growth factor stimulus	19_GO:0050896 response to stimulus	-17	28	20	30284	93	172	15	8.7	2.2	207|1432|1956|2064|2260|2263|2321|3480|3815|4233|5228|5290|5970|7412|7422	AKT1|MAPK14|EGFR|ERBB2|FGFR1|FGFR2|FLT1|IGF1R|KIT|MET|PGF|PIK3CA|RELA|VCAM1|VEGFA	-15	MyList
GO Biological Processes	19	GO:0050731	positive regulation of peptidyl-tyrosine phosphorylation	19_GO:0048518 positive regulation of biological process	-17	24	19	30284	116	172	16	9.3	2.2	920|1950|2255|2475|3458|3479|3569|3606|3815|5175|5781|6850|6868|7040|7157|7422	CD4|EGF|FGF10|MTOR|IFNG|IGF1|IL6|IL18|KIT|PECAM1|PTPN11|SYK|ADAM17|TGFB1|TP53|VEGFA	-15	MyList
GO Biological Processes	19	GO:0030162	regulation of proteolysis	19_GO:0050789 regulation of biological process	-17	8.8	14	30284	538	172	27	16	2.8	207|355|834|841|857|1950|2147|2932|3458|3553|3586|4318|4323|4780|5327|5328|5728|5894|6774|7076|7077|7124|7157|7422|7498|10062|27113	AKT1|FAS|CASP1|CASP8|CAV1|EGF|F2|GSK3B|IFNG|IL1B|IL10|MMP9|MMP14|NFE2L2|PLAT|PLAU|PTEN|RAF1|STAT3|TIMP1|TIMP2|TNF|TP53|VEGFA|XDH|NR1H3|BBC3	-15	MyList
GO Biological Processes	19	GO:0071456	cellular response to hypoxia	19_GO:0050896 response to stimulus	-17	21	18	30284	142	172	17	9.9	2.3	596|655|875|1788|1906|2263|2309|2353|2475|3091|4780|5468|5743|7040|7157|7422|27113	BCL2|BMP7|CBS|DNMT3A|EDN1|FGFR2|FOXO3|FOS|MTOR|HIF1A|NFE2L2|PPARG|PTGS2|TGFB1|TP53|VEGFA|BBC3	-15	MyList
GO Biological Processes	19	GO:0030595	leukocyte chemotaxis	19_GO:0040011 locomotion	-17	21	18	30284	142	172	17	9.9	2.3	240|1511|2321|3553|3569|3586|3627|3815|3958|4313|5294|6352|6367|6387|6850|7422|54210	ALOX5|CTSG|FLT1|IL1B|IL6|IL10|CXCL10|KIT|LGALS3|MMP2|PIK3CG|CCL5|CCL22|CXCL12|SYK|VEGFA|TREM1	-15	MyList
GO Biological Processes	19	GO:1904705	regulation of vascular associated smooth muscle cell proliferation	19_GO:0050789 regulation of biological process	-17	28	20	30284	94	172	15	8.7	2.2	1026|1786|1906|2247|2263|3479|3586|3725|4313|4318|5468|5728|6648|7124|407006	CDKN1A|DNMT1|EDN1|FGF2|FGFR2|IGF1|IL10|JUN|MMP2|MMP9|PPARG|PTEN|SOD2|TNF|MIR221	-15	MyList
GO Biological Processes	19	GO:0010594	regulation of endothelial cell migration	19_GO:0040011 locomotion	-17	15	16	30284	236	172	20	12	2.4	207|1906|1950|2247|2260|2821|3091|4233|4780|4846|5294|5468|5578|5743|6667|6868|7040|7124|7422|407006	AKT1|EDN1|EGF|FGF2|FGFR1|GPI|HIF1A|MET|NFE2L2|NOS3|PIK3CG|PPARG|PRKCA|PTGS2|SP1|ADAM17|TGFB1|TNF|VEGFA|MIR221	-15	MyList
GO Biological Processes	19	GO:0002685	regulation of leukocyte migration	19_GO:0040011 locomotion	-17	15	16	30284	236	172	20	12	2.4	207|1588|1803|1906|1991|3569|3627|3958|4282|4323|5228|5295|5594|6352|6387|6403|6868|7040|7124|7422	AKT1|CYP19A1|DPP4|EDN1|ELANE|IL6|CXCL10|LGALS3|MIF|MMP14|PGF|PIK3R1|MAPK1|CCL5|CXCL12|SELP|ADAM17|TGFB1|TNF|VEGFA	-15	MyList
GO Biological Processes	19	GO:0051960	regulation of nervous system development	19_GO:0032502 developmental process	-17	9.7	14	30284	454	172	25	15	2.7	207|627|655|673|1499|1890|1956|2147|2247|2475|3091|3458|3553|3569|3815|4137|5604|5728|5970|6387|7040|7124|7157|7422|407006	AKT1|BDNF|BMP7|BRAF|CTNNB1|TYMP|EGFR|F2|FGF2|MTOR|HIF1A|IFNG|IL1B|IL6|KIT|MAPT|MAP2K1|PTEN|RELA|CXCL12|TGFB1|TNF|TP53|VEGFA|MIR221	-15	MyList
GO Biological Processes	19	GO:0045765	regulation of angiogenesis	19_GO:0032502 developmental process	-17	11	15	30284	363	172	23	13	2.6	240|1499|2064|2247|2321|3091|3553|3569|3586|3627|4780|4846|5294|5468|5578|5970|6667|6772|6774|7048|7124|7422|407006	ALOX5|CTNNB1|ERBB2|FGF2|FLT1|HIF1A|IL1B|IL6|IL10|CXCL10|NFE2L2|NOS3|PIK3CG|PPARG|PRKCA|RELA|SP1|STAT1|STAT3|TGFBR2|TNF|VEGFA|MIR221	-15	MyList
GO Biological Processes	19	GO:0051248	negative regulation of protein metabolic process	19_GO:0048519 negative regulation of biological process	-17	7	13	30284	782	172	31	18	2.9	207|857|1026|1499|1906|1956|2147|2932|2950|3156|3479|3553|3586|3685|4137|4282|4318|4790|4843|5327|5328|5728|5894|5970|7076|7077|7157|7422|7498|10062|407006	AKT1|CAV1|CDKN1A|CTNNB1|EDN1|EGFR|F2|GSK3B|GSTP1|HMGCR|IGF1|IL1B|IL10|ITGAV|MAPT|MIF|MMP9|NFKB1|NOS2|PLAT|PLAU|PTEN|RAF1|RELA|TIMP1|TIMP2|TP53|VEGFA|XDH|NR1H3|MIR221	-15	MyList
GO Biological Processes	19	GO:0001763	morphogenesis of a branching structure	19_GO:0032502 developmental process	-17	18	17	30284	179	172	18	10	2.3	367|596|655|1499|1906|1950|2099|2247|2255|2260|2263|3586|4233|4323|5241|7040|7048|7422	AR|BCL2|BMP7|CTNNB1|EDN1|EGF|ESR1|FGF2|FGF10|FGFR1|FGFR2|IL10|MET|MMP14|PGR|TGFB1|TGFBR2|VEGFA	-15	MyList
GO Biological Processes	19	GO:0001890	placenta development	19_GO:0032502 developmental process	-17	20	18	30284	151	172	17	9.9	2.3	142|207|655|841|1432|1508|1956|2263|3091|3586|3726|5468|5594|5604|5743|6647|8061	PARP1|AKT1|BMP7|CASP8|MAPK14|CTSB|EGFR|FGFR2|HIF1A|IL10|JUNB|PPARG|MAPK1|MAP2K1|PTGS2|SOD1|FOSL1	-15	MyList
GO Biological Processes	19	GO:0045087	innate immune response	19_GO:0044419 biological process involved in interspecies interaction between organisms	-17	6.9	13	30284	791	172	31	18	2.9	142|715|716|834|1906|3458|3551|3606|3627|3934|3958|4282|4314|4790|4843|5294|5295|5468|5894|5970|6352|6772|6850|7099|7124|7157|7189|7431|23569|54210|114548	PARP1|C1R|C1S|CASP1|EDN1|IFNG|IKBKB|IL18|CXCL10|LCN2|LGALS3|MIF|MMP3|NFKB1|NOS2|PIK3CG|PIK3R1|PPARG|RAF1|RELA|CCL5|STAT1|SYK|TLR4|TNF|TP53|TRAF6|VIM|PADI4|TREM1|NLRP3	-15	MyList
GO Biological Processes	19	GO:0044089	positive regulation of cellular component biogenesis	19_GO:0048518 positive regulation of biological process	-17	8.9	14	30284	512	172	26	15	2.7	581|627|655|673|857|2475|2932|3458|3815|3958|4137|4233|4312|4314|5290|5295|5578|5599|6850|7040|7046|7099|7124|7157|7422|27113	BAX|BDNF|BMP7|BRAF|CAV1|MTOR|GSK3B|IFNG|KIT|LGALS3|MAPT|MET|MMP1|MMP3|PIK3CA|PIK3R1|PRKCA|MAPK8|SYK|TGFB1|TGFBR1|TLR4|TNF|TP53|VEGFA|BBC3	-15	MyList
GO Biological Processes	19	GO:0050767	regulation of neurogenesis	19_GO:0032502 developmental process	-17	11	14	30284	372	172	23	13	2.6	627|655|673|1499|1956|2147|2247|2475|3091|3458|3553|3569|3815|4137|5604|5728|5970|6387|7040|7124|7157|7422|407006	BDNF|BMP7|BRAF|CTNNB1|EGFR|F2|FGF2|MTOR|HIF1A|IFNG|IL1B|IL6|KIT|MAPT|MAP2K1|PTEN|RELA|CXCL12|TGFB1|TNF|TP53|VEGFA|MIR221	-15	MyList
GO Biological Processes	19	GO:1903530	regulation of secretion by cell	19_GO:0051179 localization	-17	8.3	13	30284	571	172	27	16	2.8	240|673|1385|1588|1906|1956|2147|2260|2308|3091|3156|3458|3479|3553|3569|4282|4843|5468|5578|5781|6352|6387|6850|7040|7099|7124|10062	ALOX5|BRAF|CREB1|CYP19A1|EDN1|EGFR|F2|FGFR1|FOXO1|HIF1A|HMGCR|IFNG|IGF1|IL1B|IL6|MIF|NOS2|PPARG|PRKCA|PTPN11|CCL5|CXCL12|SYK|TGFB1|TLR4|TNF|NR1H3	-15	MyList
GO Biological Processes	19	GO:0050730	regulation of peptidyl-tyrosine phosphorylation	19_GO:0050789 regulation of biological process	-16	19	17	30284	156	172	17	9.9	2.3	920|1950|1956|2255|2475|3458|3479|3569|3606|3815|5175|5781|6850|6868|7040|7157|7422	CD4|EGF|EGFR|FGF10|MTOR|IFNG|IGF1|IL6|IL18|KIT|PECAM1|PTPN11|SYK|ADAM17|TGFB1|TP53|VEGFA	-15	MyList
GO Biological Processes	19	GO:0001503	ossification	19_GO:0032501 multicellular organismal process	-16	13	15	30284	294	172	21	12	2.5	207|596|655|847|875|1432|1499|1513|1956|2247|2263|3091|3479|3726|3727|4313|4322|4323|5743|7067|7189	AKT1|BCL2|BMP7|CAT|CBS|MAPK14|CTNNB1|CTSK|EGFR|FGF2|FGFR2|HIF1A|IGF1|JUNB|JUND|MMP2|MMP13|MMP14|PTGS2|THRA|TRAF6	-15	MyList
GO Biological Processes	19	GO:0031960	response to corticosteroid	19_GO:0050896 response to stimulus	-16	19	17	30284	157	172	17	9.9	2.3	142|596|836|1026|1906|1956|2309|2353|2908|3480|3569|3586|5290|5743|7040|7124|8061	PARP1|BCL2|CASP3|CDKN1A|EDN1|EGFR|FOXO3|FOS|NR3C1|IGF1R|IL6|IL10|PIK3CA|PTGS2|TGFB1|TNF|FOSL1	-15	MyList
GO Biological Processes	19	GO:0097529	myeloid leukocyte migration	19_GO:0002376 immune system process	-16	22	18	30284	131	172	16	9.3	2.2	1511|2321|3553|3569|3627|3815|3958|4313|5175|5294|5295|6352|6367|6850|7422|54210	CTSG|FLT1|IL1B|IL6|CXCL10|KIT|LGALS3|MMP2|PECAM1|PIK3CG|PIK3R1|CCL5|CCL22|SYK|VEGFA|TREM1	-14	MyList
GO Biological Processes	19	GO:0030522	intracellular receptor signaling pathway	19_GO:0050896 response to stimulus	-16	17	16	30284	191	172	18	10	2.3	196|367|2099|2100|2908|3551|4792|5241|5468|5594|5970|6774|7067|7099|7124|7189|10062|114548	AHR|AR|ESR1|ESR2|NR3C1|IKBKB|NFKBIA|PGR|PPARG|MAPK1|RELA|STAT3|THRA|TLR4|TNF|TRAF6|NR1H3|NLRP3	-14	MyList
GO Biological Processes	19	GO:0009267	cellular response to starvation	19_GO:0050896 response to stimulus	-16	17	16	30284	191	172	18	10	2.3	213|355|596|857|1026|1513|2308|2309|2353|2475|3309|3480|4780|5594|5599|6667|6721|7157	ALB|FAS|BCL2|CAV1|CDKN1A|CTSK|FOXO1|FOXO3|FOS|MTOR|HSPA5|IGF1R|NFE2L2|MAPK1|MAPK8|SP1|SREBF2|TP53	-14	MyList
GO Biological Processes	19	GO:0045639	positive regulation of myeloid cell differentiation	19_GO:0002376 immune system process	-16	25	19	30284	107	172	15	8.7	2.2	841|920|1385|1432|2309|2353|3091|3458|5578|6772|6774|7040|7124|7189|407006	CASP8|CD4|CREB1|MAPK14|FOXO3|FOS|HIF1A|IFNG|PRKCA|STAT1|STAT3|TGFB1|TNF|TRAF6|MIR221	-14	MyList
GO Biological Processes	19	GO:0045088	regulation of innate immune response	19_GO:0044419 biological process involved in interspecies interaction between organisms	-16	9.1	14	30284	482	172	25	15	2.7	142|207|834|841|857|1520|2099|3551|4321|4780|4792|5295|5468|5599|5781|5970|6352|6850|7040|7099|7124|7189|8061|10062|114548	PARP1|AKT1|CASP1|CASP8|CAV1|CTSS|ESR1|IKBKB|MMP12|NFE2L2|NFKBIA|PIK3R1|PPARG|MAPK8|PTPN11|RELA|CCL5|SYK|TGFB1|TLR4|TNF|TRAF6|FOSL1|NR1H3|NLRP3	-14	MyList
GO Biological Processes	19	GO:0007584	response to nutrient	19_GO:0050896 response to stimulus	-16	19	17	30284	161	172	17	9.9	2.3	655|847|875|1788|1956|2475|3480|3627|4780|5009|5468|5743|5970|6648|6772|7040|7412	BMP7|CAT|CBS|DNMT3A|EGFR|MTOR|IGF1R|CXCL10|NFE2L2|OTC|PPARG|PTGS2|RELA|SOD2|STAT1|TGFB1|VCAM1	-14	MyList
GO Biological Processes	19	GO:0030324	lung development	19_GO:0032502 developmental process	-16	16	16	30284	193	172	18	10	2.3	1385|1499|1956|2247|2255|2260|2263|3290|4321|4323|4846|5241|5594|5604|7040|7048|7067|7422	CREB1|CTNNB1|EGFR|FGF2|FGF10|FGFR1|FGFR2|HSD11B1|MMP12|MMP14|NOS3|PGR|MAPK1|MAP2K1|TGFB1|TGFBR2|THRA|VEGFA	-14	MyList
GO Biological Processes	19	GO:0032963	collagen metabolic process	19_GO:0009987 cellular process	-16	35	21	30284	66	172	13	7.6	2	1508|1513|1520|3091|4312|4313|4314|4316|4317|4318|4321|4322|4323	CTSB|CTSK|CTSS|HIF1A|MMP1|MMP2|MMP3|MMP7|MMP8|MMP9|MMP12|MMP13|MMP14	-14	MyList
GO Biological Processes	19	GO:0050729	positive regulation of inflammatory response	19_GO:0048518 positive regulation of biological process	-16	18	17	30284	163	172	17	9.9	2.3	834|836|2167|3458|3553|3558|3569|3606|4317|4792|5294|5320|5743|7040|7099|7124|114548	CASP1|CASP3|FABP4|IFNG|IL1B|IL2|IL6|IL18|MMP8|NFKBIA|PIK3CG|PLA2G2A|PTGS2|TGFB1|TLR4|TNF|NLRP3	-14	MyList
GO Biological Processes	19	GO:0044703	multi-organism reproductive process	19_GO:0022414 reproductive process	-16	16	16	30284	195	172	18	10	2.3	142|207|367|596|875|1508|1906|2099|2353|3553|3726|4313|4318|5241|5743|6647|7040|8061	PARP1|AKT1|AR|BCL2|CBS|CTSB|EDN1|ESR1|FOS|IL1B|JUNB|MMP2|MMP9|PGR|PTGS2|SOD1|TGFB1|FOSL1	-14	MyList
GO Biological Processes	19	GO:0051384	response to glucocorticoid	19_GO:0050896 response to stimulus	-16	21	17	30284	136	172	16	9.3	2.2	596|836|1026|1906|1956|2309|2353|2908|3480|3569|3586|5290|5743|7040|7124|8061	BCL2|CASP3|CDKN1A|EDN1|EGFR|FOXO3|FOS|NR3C1|IGF1R|IL6|IL10|PIK3CA|PTGS2|TGFB1|TNF|FOSL1	-14	MyList
GO Biological Processes	19	GO:0062012	regulation of small molecule metabolic process	19_GO:0050789 regulation of biological process	-16	11	14	30284	350	172	22	13	2.5	142|207|857|1385|2308|2475|2908|3091|3458|3479|3553|3815|4790|4846|5468|5594|5743|6721|6774|7124|7157|10062	PARP1|AKT1|CAV1|CREB1|FOXO1|MTOR|NR3C1|HIF1A|IFNG|IGF1|IL1B|KIT|NFKB1|NOS3|PPARG|MAPK1|PTGS2|SREBF2|STAT3|TNF|TP53|NR1H3	-14	MyList
GO Biological Processes	19	GO:0030323	respiratory tube development	19_GO:0032502 developmental process	-16	16	16	30284	197	172	18	10	2.3	1385|1499|1956|2247|2255|2260|2263|3290|4321|4323|4846|5241|5594|5604|7040|7048|7067|7422	CREB1|CTNNB1|EGFR|FGF2|FGF10|FGFR1|FGFR2|HSD11B1|MMP12|MMP14|NOS3|PGR|MAPK1|MAP2K1|TGFB1|TGFBR2|THRA|VEGFA	-14	MyList
GO Biological Processes	19	GO:0048771	tissue remodeling	19_GO:0032501 multicellular organismal process	-16	24	18	30284	111	172	15	8.7	2.2	581|857|875|1499|1513|2255|3091|4313|4323|4790|4846|4883|7040|7076|7189	BAX|CAV1|CBS|CTNNB1|CTSK|FGF10|HIF1A|MMP2|MMP14|NFKB1|NOS3|NPR3|TGFB1|TIMP1|TRAF6	-14	MyList
GO Biological Processes	19	GO:0001701	in utero embryonic development	19_GO:0032502 developmental process	-16	10	14	30284	397	172	23	13	2.6	207|367|655|841|1026|1499|1906|1956|2260|2263|2821|3091|3586|3726|4846|5594|5604|7046|7048|7157|7189|7422|8061	AKT1|AR|BMP7|CASP8|CDKN1A|CTNNB1|EDN1|EGFR|FGFR1|FGFR2|GPI|HIF1A|IL10|JUNB|NOS3|MAPK1|MAP2K1|TGFBR1|TGFBR2|TP53|TRAF6|VEGFA|FOSL1	-14	MyList
GO Biological Processes	19	GO:0050769	positive regulation of neurogenesis	19_GO:0032502 developmental process	-16	14	15	30284	234	172	19	11	2.4	627|673|1499|1956|2247|2475|3091|3458|3553|3569|3815|4137|5604|5970|6387|7040|7124|7422|407006	BDNF|BRAF|CTNNB1|EGFR|FGF2|MTOR|HIF1A|IFNG|IL1B|IL6|KIT|MAPT|MAP2K1|RELA|CXCL12|TGFB1|TNF|VEGFA|MIR221	-14	MyList
GO Biological Processes	19	GO:0070665	positive regulation of leukocyte proliferation	19_GO:0048518 positive regulation of biological process	-16	18	17	30284	168	172	17	9.9	2.3	596|1026|2255|3479|3553|3558|3569|3606|3815|4282|5594|6352|6850|7048|7099|7189|7412	BCL2|CDKN1A|FGF10|IGF1|IL1B|IL2|IL6|IL18|KIT|MIF|MAPK1|CCL5|SYK|TGFBR2|TLR4|TRAF6|VCAM1	-14	MyList
GO Biological Processes	19	GO:0048754	branching morphogenesis of an epithelial tube	19_GO:0032502 developmental process	-16	20	17	30284	139	172	16	9.3	2.2	367|596|655|1499|1906|1950|2099|2247|2255|2263|4233|4323|5241|7040|7048|7422	AR|BCL2|BMP7|CTNNB1|EDN1|EGF|ESR1|FGF2|FGF10|FGFR2|MET|MMP14|PGR|TGFB1|TGFBR2|VEGFA	-14	MyList
GO Biological Processes	19	GO:0051223	regulation of protein transport	19_GO:0051179 localization	-16	9.4	14	30284	449	172	24	14	2.6	240|1432|1956|2147|2308|2932|3091|3156|3458|3479|3553|3569|4843|5295|5468|5578|5743|5781|6352|7040|7099|7124|10062|26229	ALOX5|MAPK14|EGFR|F2|FOXO1|GSK3B|HIF1A|HMGCR|IFNG|IGF1|IL1B|IL6|NOS2|PIK3R1|PPARG|PRKCA|PTGS2|PTPN11|CCL5|TGFB1|TLR4|TNF|NR1H3|B3GAT3	-14	MyList
GO Biological Processes	19	GO:0097191	extrinsic apoptotic signaling pathway	19_GO:0050896 response to stimulus	-16	23	18	30284	114	172	15	8.7	2.2	355|581|596|841|2255|2309|2932|3458|3553|3558|3685|5295|5894|7040|7124	FAS|BAX|BCL2|CASP8|FGF10|FOXO3|GSK3B|IFNG|IL1B|IL2|ITGAV|PIK3R1|RAF1|TGFB1|TNF	-14	MyList
GO Biological Processes	19	GO:0044706	multi-multicellular organism process	19_GO:0032501 multicellular organismal process	-16	16	16	30284	203	172	18	10	2.3	142|207|367|596|875|1508|1906|2099|2353|3553|3726|4313|4318|5241|5743|6647|7040|8061	PARP1|AKT1|AR|BCL2|CBS|CTSB|EDN1|ESR1|FOS|IL1B|JUNB|MMP2|MMP9|PGR|PTGS2|SOD1|TGFB1|FOSL1	-14	MyList
GO Biological Processes	19	GO:0008286	insulin receptor signaling pathway	19_GO:0050896 response to stimulus	-16	23	18	30284	115	172	15	8.7	2.2	207|1956|2064|2260|2263|2308|2321|2932|3480|3815|4233|5290|5295|5594|5894	AKT1|EGFR|ERBB2|FGFR1|FGFR2|FOXO1|FLT1|GSK3B|IGF1R|KIT|MET|PIK3CA|PIK3R1|MAPK1|RAF1	-14	MyList
GO Biological Processes	19	GO:0007565	female pregnancy	19_GO:0022414 reproductive process	-16	17	16	30284	174	172	17	9.9	2.3	142|207|367|596|875|1508|2099|2353|3553|3726|4313|4318|5241|5743|6647|7040|8061	PARP1|AKT1|AR|BCL2|CBS|CTSB|ESR1|FOS|IL1B|JUNB|MMP2|MMP9|PGR|PTGS2|SOD1|TGFB1|FOSL1	-14	MyList
GO Biological Processes	19	GO:0002683	negative regulation of immune system process	19_GO:0002376 immune system process	-16	8.1	13	30284	564	172	26	15	2.7	142|196|207|836|1432|1499|1511|1588|1803|2064|3558|3586|3958|4282|4321|5295|5320|5468|5781|6387|6850|7040|7099|7124|10062|407006	PARP1|AHR|AKT1|CASP3|MAPK14|CTNNB1|CTSG|CYP19A1|DPP4|ERBB2|IL2|IL10|LGALS3|MIF|MMP12|PIK3R1|PLA2G2A|PPARG|PTPN11|CXCL12|SYK|TGFB1|TLR4|TNF|NR1H3|MIR221	-14	MyList
GO Biological Processes	19	GO:0042742	defense response to bacterium	19_GO:0044419 biological process involved in interspecies interaction between organisms	-16	11	14	30284	324	172	21	12	2.5	834|920|1511|1991|2147|3553|3569|3586|3606|3934|4316|4353|4790|4843|5320|6403|6850|6868|7099|7124|54210	CASP1|CD4|CTSG|ELANE|F2|IL1B|IL6|IL10|IL18|LCN2|MMP7|MPO|NFKB1|NOS2|PLA2G2A|SELP|SYK|ADAM17|TLR4|TNF|TREM1	-14	MyList
GO Biological Processes	19	GO:0045859	regulation of protein kinase activity	19_GO:0050789 regulation of biological process	-16	10	14	30284	369	172	22	13	2.5	207|595|920|1026|1906|1956|1991|2064|2247|2260|2321|2950|3458|3479|3553|5294|5604|5728|6868|7099|7124|7189	AKT1|CCND1|CD4|CDKN1A|EDN1|EGFR|ELANE|ERBB2|FGF2|FGFR1|FLT1|GSTP1|IFNG|IGF1|IL1B|PIK3CG|MAP2K1|PTEN|ADAM17|TLR4|TNF|TRAF6	-14	MyList
GO Biological Processes	19	GO:0048638	regulation of developmental growth	19_GO:0040007 growth	-16	11	14	30284	327	172	21	12	2.5	207|367|596|627|1026|1385|1432|1906|2247|2260|2263|2932|3479|4137|5290|5728|6387|6647|6774|7046|7422	AKT1|AR|BCL2|BDNF|CDKN1A|CREB1|MAPK14|EDN1|FGF2|FGFR1|FGFR2|GSK3B|IGF1|MAPT|PIK3CA|PTEN|CXCL12|SOD1|STAT3|TGFBR1|VEGFA	-14	MyList
GO Biological Processes	19	GO:0060326	cell chemotaxis	19_GO:0040011 locomotion	-15	15	15	30284	213	172	18	10	2.3	240|1511|2321|3553|3569|3586|3627|3815|3958|4313|5294|6352|6367|6387|6850|7412|7422|54210	ALOX5|CTSG|FLT1|IL1B|IL6|IL10|CXCL10|KIT|LGALS3|MMP2|PIK3CG|CCL5|CCL22|CXCL12|SYK|VCAM1|VEGFA|TREM1	-14	MyList
GO Biological Processes	19	GO:0007507	heart development	19_GO:0032502 developmental process	-15	7.9	13	30284	578	172	26	15	2.7	655|836|841|1026|1499|1906|2064|2247|2260|2263|2475|3091|3480|4313|4846|5594|5604|5728|5781|6648|7040|7046|7048|7157|7412|7422	BMP7|CASP3|CASP8|CDKN1A|CTNNB1|EDN1|ERBB2|FGF2|FGFR1|FGFR2|MTOR|HIF1A|IGF1R|MMP2|NOS3|MAPK1|MAP2K1|PTEN|PTPN11|SOD2|TGFB1|TGFBR1|TGFBR2|TP53|VCAM1|VEGFA	-14	MyList
GO Biological Processes	19	GO:0009636	response to toxic substance	19_GO:0050896 response to stimulus	-15	13	15	30284	253	172	19	11	2.4	196|213|581|596|847|1026|1788|2353|2936|2950|4353|4780|4846|5742|5743|6352|6647|6648|7124	AHR|ALB|BAX|BCL2|CAT|CDKN1A|DNMT3A|FOS|GSR|GSTP1|MPO|NFE2L2|NOS3|PTGS1|PTGS2|CCL5|SOD1|SOD2|TNF	-13	MyList
GO Biological Processes	19	GO:0050920	regulation of chemotaxis	19_GO:0040011 locomotion	-15	15	15	30284	217	172	18	10	2.3	1588|1803|1906|1991|2247|2255|2260|3569|3627|4233|4282|5228|5594|6352|6387|6868|7040|7422	CYP19A1|DPP4|EDN1|ELANE|FGF2|FGF10|FGFR1|IL6|CXCL10|MET|MIF|PGF|MAPK1|CCL5|CXCL12|ADAM17|TGFB1|VEGFA	-13	MyList
GO Biological Processes	19	GO:0008015	blood circulation	19_GO:0032501 multicellular organismal process	-15	9.4	13	30284	429	172	23	13	2.6	367|857|875|1511|1906|1956|2475|3627|4313|4843|4846|4883|5290|5468|5742|5743|6387|6647|6648|6772|7040|7124|7422	AR|CAV1|CBS|CTSG|EDN1|EGFR|MTOR|CXCL10|MMP2|NOS2|NOS3|NPR3|PIK3CA|PPARG|PTGS1|PTGS2|CXCL12|SOD1|SOD2|STAT1|TGFB1|TNF|VEGFA	-13	MyList
GO Biological Processes	19	GO:0042129	regulation of T cell proliferation	19_GO:0002376 immune system process	-15	16	16	30284	184	172	17	9.9	2.3	836|1499|2064|3479|3553|3558|3569|3586|3606|3958|5320|6352|6850|7040|7048|7189|7412	CASP3|CTNNB1|ERBB2|IGF1|IL1B|IL2|IL6|IL10|IL18|LGALS3|PLA2G2A|CCL5|SYK|TGFB1|TGFBR2|TRAF6|VCAM1	-13	MyList
GO Biological Processes	19	GO:0060541	respiratory system development	19_GO:0032502 developmental process	-15	14	15	30284	220	172	18	10	2.3	1385|1499|1956|2247|2255|2260|2263|3290|4321|4323|4846|5241|5594|5604|7040|7048|7067|7422	CREB1|CTNNB1|EGFR|FGF2|FGF10|FGFR1|FGFR2|HSD11B1|MMP12|MMP14|NOS3|PGR|MAPK1|MAP2K1|TGFB1|TGFBR2|THRA|VEGFA	-13	MyList
GO Biological Processes	19	GO:0043536	positive regulation of blood vessel endothelial cell migration	19_GO:0040011 locomotion	-15	29	19	30284	78	172	13	7.6	2	207|2247|2260|3091|4780|4846|5578|5743|6667|6868|7040|7422|407006	AKT1|FGF2|FGFR1|HIF1A|NFE2L2|NOS3|PRKCA|PTGS2|SP1|ADAM17|TGFB1|VEGFA|MIR221	-13	MyList
GO Biological Processes	19	GO:0061180	mammary gland epithelium development	19_GO:0032502 developmental process	-15	36	20	30284	59	172	12	7	1.9	207|367|595|2099|2247|2255|2263|2908|3091|5241|5594|7040	AKT1|AR|CCND1|ESR1|FGF2|FGF10|FGFR2|NR3C1|HIF1A|PGR|MAPK1|TGFB1	-13	MyList
GO Biological Processes	19	GO:0048598	embryonic morphogenesis	19_GO:0032502 developmental process	-15	7.7	12	30284	597	172	26	15	2.7	581|655|836|1499|1906|2247|2255|2260|2263|2321|2821|3091|3586|3685|4313|4317|4318|4323|5594|5604|6647|7040|7046|7048|7157|7189	BAX|BMP7|CASP3|CTNNB1|EDN1|FGF2|FGF10|FGFR1|FGFR2|FLT1|GPI|HIF1A|IL10|ITGAV|MMP2|MMP8|MMP9|MMP14|MAPK1|MAP2K1|SOD1|TGFB1|TGFBR1|TGFBR2|TP53|TRAF6	-13	MyList
GO Biological Processes	19	GO:0021782	glial cell development	19_GO:0032502 developmental process	-15	21	17	30284	128	172	15	8.7	2.2	207|1956|2064|3458|3553|4137|5594|5604|5728|5894|6647|7040|7099|7124|7431	AKT1|EGFR|ERBB2|IFNG|IL1B|MAPT|MAPK1|MAP2K1|PTEN|RAF1|SOD1|TGFB1|TLR4|TNF|VIM	-13	MyList
GO Biological Processes	19	GO:1905952	regulation of lipid localization	19_GO:0051179 localization	-15	16	15	30284	189	172	17	9.9	2.3	207|857|1588|1906|1950|3553|3569|3685|4282|4790|4792|5468|5781|6721|6850|7124|10062	AKT1|CAV1|CYP19A1|EDN1|EGF|IL1B|IL6|ITGAV|MIF|NFKB1|NFKBIA|PPARG|PTPN11|SREBF2|SYK|TNF|NR1H3	-13	MyList
GO Biological Processes	19	GO:0043549	regulation of kinase activity	19_GO:0050789 regulation of biological process	-15	9.8	13	30284	397	172	22	13	2.5	207|595|920|1026|1906|1956|1991|2064|2247|2260|2321|2950|3458|3479|3553|5294|5604|5728|6868|7099|7124|7189	AKT1|CCND1|CD4|CDKN1A|EDN1|EGFR|ELANE|ERBB2|FGF2|FGFR1|FLT1|GSTP1|IFNG|IGF1|IL1B|PIK3CG|MAP2K1|PTEN|ADAM17|TLR4|TNF|TRAF6	-13	MyList
GO Biological Processes	19	GO:0060443	mammary gland morphogenesis	19_GO:0032502 developmental process	-15	43	21	30284	45	172	11	6.4	1.9	367|581|857|2099|2255|2263|2908|4790|5241|7040|7048	AR|BAX|CAV1|ESR1|FGF10|FGFR2|NR3C1|NFKB1|PGR|TGFB1|TGFBR2	-13	MyList
GO Biological Processes	19	GO:0032642	regulation of chemokine production	19_GO:0032501 multicellular organismal process	-15	23	17	30284	105	172	14	8.1	2.1	1991|2950|3091|3458|3553|3569|3586|3606|4282|6850|6868|7040|7099|7124	ELANE|GSTP1|HIF1A|IFNG|IL1B|IL6|IL10|IL18|MIF|SYK|ADAM17|TGFB1|TLR4|TNF	-13	MyList
GO Biological Processes	19	GO:0031348	negative regulation of defense response	19_GO:0048519 negative regulation of biological process	-15	11	14	30284	308	172	20	12	2.4	142|196|240|1432|1588|1991|2950|3479|3558|3586|4321|4790|5468|6647|6774|6850|7040|10062|114548|407006	PARP1|AHR|ALOX5|MAPK14|CYP19A1|ELANE|GSTP1|IGF1|IL2|IL10|MMP12|NFKB1|PPARG|SOD1|STAT3|SYK|TGFB1|NR1H3|NLRP3|MIR221	-13	MyList
GO Biological Processes	19	GO:0051091	positive regulation of DNA-binding transcription factor activity	19_GO:0050789 regulation of biological process	-15	15	15	30284	195	172	17	9.9	2.3	207|367|1906|2099|2100|3551|3553|3569|3586|3606|3815|5728|5970|7099|7124|7189|114548	AKT1|AR|EDN1|ESR1|ESR2|IKBKB|IL1B|IL6|IL10|IL18|KIT|PTEN|RELA|TLR4|TNF|TRAF6|NLRP3	-13	MyList
GO Biological Processes	19	GO:1903708	positive regulation of hemopoiesis	19_GO:0002376 immune system process	-15	15	15	30284	195	172	17	9.9	2.3	841|920|1385|2309|2353|3458|3558|3586|3606|4323|5578|6850|7040|7048|7124|7189|114548	CASP8|CD4|CREB1|FOXO3|FOS|IFNG|IL2|IL10|IL18|MMP14|PRKCA|SYK|TGFB1|TGFBR2|TNF|TRAF6|NLRP3	-13	MyList
GO Biological Processes	19	GO:1902107	positive regulation of leukocyte differentiation	19_GO:0002376 immune system process	-15	15	15	30284	195	172	17	9.9	2.3	841|920|1385|2309|2353|3458|3558|3586|3606|4323|5578|6850|7040|7048|7124|7189|114548	CASP8|CD4|CREB1|FOXO3|FOS|IFNG|IL2|IL10|IL18|MMP14|PRKCA|SYK|TGFB1|TGFBR2|TNF|TRAF6|NLRP3	-13	MyList
GO Biological Processes	19	GO:0042594	response to starvation	19_GO:0050896 response to stimulus	-15	14	15	30284	232	172	18	10	2.3	213|355|596|857|1026|1513|2308|2309|2353|2475|3309|3480|4780|5594|5599|6667|6721|7157	ALB|FAS|BCL2|CAV1|CDKN1A|CTSK|FOXO1|FOXO3|FOS|MTOR|HSPA5|IGF1R|NFE2L2|MAPK1|MAPK8|SP1|SREBF2|TP53	-13	MyList
GO Biological Processes	19	GO:0048568	embryonic organ development	19_GO:0032502 developmental process	-15	8.9	13	30284	454	172	23	13	2.6	207|655|841|1499|1906|1956|2255|2260|2263|3091|3586|3726|3815|4323|5594|5604|6647|7040|7046|7048|7124|7157|7422	AKT1|BMP7|CASP8|CTNNB1|EDN1|EGFR|FGF10|FGFR1|FGFR2|HIF1A|IL10|JUNB|KIT|MMP14|MAPK1|MAP2K1|SOD1|TGFB1|TGFBR1|TGFBR2|TNF|TP53|VEGFA	-13	MyList
GO Biological Processes	19	GO:0001938	positive regulation of endothelial cell proliferation	19_GO:0048518 positive regulation of biological process	-15	23	17	30284	108	172	14	8.1	2.1	207|1950|2247|2255|2260|3091|3586|5578|6387|6667|6774|6868|7046|7422	AKT1|EGF|FGF2|FGF10|FGFR1|HIF1A|IL10|PRKCA|CXCL12|SP1|STAT3|ADAM17|TGFBR1|VEGFA	-13	MyList
GO Biological Processes	19	GO:0050708	regulation of protein secretion	19_GO:0051179 localization	-15	12	14	30284	273	172	19	11	2.4	240|1956|2147|2308|3091|3156|3458|3479|3553|3569|4843|5468|5578|5781|6352|7040|7099|7124|10062	ALOX5|EGFR|F2|FOXO1|HIF1A|HMGCR|IFNG|IGF1|IL1B|IL6|NOS2|PPARG|PRKCA|PTPN11|CCL5|TGFB1|TLR4|TNF|NR1H3	-13	MyList
GO Biological Processes	19	GO:0060562	epithelial tube morphogenesis	19_GO:0032502 developmental process	-15	11	14	30284	316	172	20	12	2.4	367|596|655|836|1499|1906|1950|2099|2247|2255|2263|2908|3091|4233|4323|5241|7040|7048|7189|7422	AR|BCL2|BMP7|CASP3|CTNNB1|EDN1|EGF|ESR1|FGF2|FGF10|FGFR2|NR3C1|HIF1A|MET|MMP14|PGR|TGFB1|TGFBR2|TRAF6|VEGFA	-13	MyList
GO Biological Processes	19	GO:0030307	positive regulation of cell growth	19_GO:0040007 growth	-15	17	16	30284	166	172	16	9.3	2.2	207|596|627|1906|1956|2064|2147|2475|3479|3558|4137|4323|6387|6868|7046|7422	AKT1|BCL2|BDNF|EDN1|EGFR|ERBB2|F2|MTOR|IGF1|IL2|MAPT|MMP14|CXCL12|ADAM17|TGFBR1|VEGFA	-13	MyList
GO Biological Processes	19	GO:0009792	embryo development ending in birth or egg hatching	19_GO:0032502 developmental process	-15	7	12	30284	680	172	27	16	2.8	207|367|655|836|841|1026|1499|1906|1956|2247|2260|2263|2821|3091|3586|3726|4323|4846|5594|5604|7040|7046|7048|7157|7189|7422|8061	AKT1|AR|BMP7|CASP3|CASP8|CDKN1A|CTNNB1|EDN1|EGFR|FGF2|FGFR1|FGFR2|GPI|HIF1A|IL10|JUNB|MMP14|NOS3|MAPK1|MAP2K1|TGFB1|TGFBR1|TGFBR2|TP53|TRAF6|VEGFA|FOSL1	-13	MyList
GO Biological Processes	19	GO:0048511	rhythmic process	19_GO:0048511 rhythmic process	-15	12	14	30284	275	172	19	11	2.4	196|836|1385|1956|2099|2309|2475|2932|3480|4313|4843|4846|5241|5468|5599|5728|6667|7124|7157	AHR|CASP3|CREB1|EGFR|ESR1|FOXO3|MTOR|GSK3B|IGF1R|MMP2|NOS2|NOS3|PGR|PPARG|MAPK8|PTEN|SP1|TNF|TP53	-13	MyList
GO Biological Processes	19	GO:0038084	vascular endothelial growth factor signaling pathway	19_GO:0050896 response to stimulus	-15	33	19	30284	65	172	12	7	1.9	1956|2064|2260|2263|2321|3480|3815|4233|5228|5290|5970|7422	EGFR|ERBB2|FGFR1|FGFR2|FLT1|IGF1R|KIT|MET|PGF|PIK3CA|RELA|VEGFA	-13	MyList
GO Biological Processes	19	GO:0060759	regulation of response to cytokine stimulus	19_GO:0050896 response to stimulus	-15	15	15	30284	201	172	17	9.9	2.3	834|841|857|1906|2950|3091|3551|3569|4317|4321|5468|5781|6352|6850|6868|7099|10062	CASP1|CASP8|CAV1|EDN1|GSTP1|HIF1A|IKBKB|IL6|MMP8|MMP12|PPARG|PTPN11|CCL5|SYK|ADAM17|TLR4|NR1H3	-13	MyList
GO Biological Processes	19	GO:0070141	response to UV-A	19_GO:0050896 response to stimulus	-15	100	28	30284	14	172	8	4.7	1.6	207|595|1956|4312|4313|4314|4318|7076	AKT1|CCND1|EGFR|MMP1|MMP2|MMP3|MMP9|TIMP1	-13	MyList
GO Biological Processes	19	GO:0051338	regulation of transferase activity	19_GO:0065007 biological regulation	-15	8.7	13	30284	464	172	23	13	2.6	207|595|920|1026|1906|1956|1991|2064|2247|2260|2321|2932|2950|3458|3479|3553|5294|5604|5728|6868|7099|7124|7189	AKT1|CCND1|CD4|CDKN1A|EDN1|EGFR|ELANE|ERBB2|FGF2|FGFR1|FLT1|GSK3B|GSTP1|IFNG|IGF1|IL1B|PIK3CG|MAP2K1|PTEN|ADAM17|TLR4|TNF|TRAF6	-13	MyList
GO Biological Processes	19	GO:1905330	regulation of morphogenesis of an epithelium	19_GO:0032502 developmental process	-15	32	19	30284	66	172	12	7	1.9	367|655|1499|1950|2099|2247|2255|2260|3627|7040|7124|7422	AR|BMP7|CTNNB1|EGF|ESR1|FGF2|FGF10|FGFR1|CXCL10|TGFB1|TNF|VEGFA	-13	MyList
GO Biological Processes	19	GO:0031334	positive regulation of protein-containing complex assembly	19_GO:0048518 positive regulation of biological process	-14	15	15	30284	205	172	17	9.9	2.3	581|2475|2932|3458|3958|4137|4233|4312|4314|5599|6850|7040|7099|7124|7157|7422|27113	BAX|MTOR|GSK3B|IFNG|LGALS3|MAPT|MET|MMP1|MMP3|MAPK8|SYK|TGFB1|TLR4|TNF|TP53|VEGFA|BBC3	-13	MyList
GO Biological Processes	19	GO:0006959	humoral immune response	19_GO:0002376 immune system process	-14	12	14	30284	282	172	19	11	2.4	240|596|715|716|1511|1991|2147|2821|3458|3569|3627|3958|4316|6352|6361|6367|6387|7124|54210	ALOX5|BCL2|C1R|C1S|CTSG|ELANE|F2|GPI|IFNG|IL6|CXCL10|LGALS3|MMP7|CCL5|CCL17|CCL22|CXCL12|TNF|TREM1	-13	MyList
GO Biological Processes	19	GO:0007610	behavior	19_GO:0032501 multicellular organismal process	-14	7.2	12	30284	634	172	26	15	2.7	207|596|673|836|1385|1803|1956|2247|2353|2475|2821|2908|3091|3156|3815|4137|5594|5728|5743|6387|6647|6648|6774|7067|7157|8061	AKT1|BCL2|BRAF|CASP3|CREB1|DPP4|EGFR|FGF2|FOS|MTOR|GPI|NR3C1|HIF1A|HMGCR|KIT|MAPT|MAPK1|PTEN|PTGS2|CXCL12|SOD1|SOD2|STAT3|THRA|TP53|FOSL1	-13	MyList
GO Biological Processes	19	GO:0050728	negative regulation of inflammatory response	19_GO:0048519 negative regulation of biological process	-14	14	15	30284	207	172	17	9.9	2.3	196|240|1432|1588|1991|2950|3479|3558|3586|4790|5468|6647|6774|6850|10062|114548|407006	AHR|ALOX5|MAPK14|CYP19A1|ELANE|GSTP1|IGF1|IL2|IL10|NFKB1|PPARG|SOD1|STAT3|SYK|NR1H3|NLRP3|MIR221	-13	MyList
GO Biological Processes	19	GO:0051962	positive regulation of nervous system development	19_GO:0032502 developmental process	-14	12	14	30284	285	172	19	11	2.4	627|673|1499|1956|2247|2475|3091|3458|3553|3569|3815|4137|5604|5970|6387|7040|7124|7422|407006	BDNF|BRAF|CTNNB1|EGFR|FGF2|MTOR|HIF1A|IFNG|IL1B|IL6|KIT|MAPT|MAP2K1|RELA|CXCL12|TGFB1|TNF|VEGFA|MIR221	-13	MyList
GO Biological Processes	19	GO:0048708	astrocyte differentiation	19_GO:0032502 developmental process	-14	31	19	30284	68	172	12	7	1.9	1956|2908|3458|3553|4137|5594|5604|5781|6774|7099|7124|7431	EGFR|NR3C1|IFNG|IL1B|MAPT|MAPK1|MAP2K1|PTPN11|STAT3|TLR4|TNF|VIM	-13	MyList
GO Biological Processes	19	GO:0048145	regulation of fibroblast proliferation	19_GO:0050789 regulation of biological process	-14	25	18	30284	90	172	13	7.6	2	581|857|1026|1499|1956|2099|2255|2950|3479|4282|6648|7040|7157	BAX|CAV1|CDKN1A|CTNNB1|EGFR|ESR1|FGF10|GSTP1|IGF1|MIF|SOD2|TGFB1|TP53	-13	MyList
GO Biological Processes	19	GO:0048762	mesenchymal cell differentiation	19_GO:0032502 developmental process	-14	16	15	30284	175	172	16	9.3	2.2	596|655|1000|1499|1906|2255|2260|2263|2932|3091|3479|5594|6772|7040|7046|7048	BCL2|BMP7|CDH2|CTNNB1|EDN1|FGF10|FGFR1|FGFR2|GSK3B|HIF1A|IGF1|MAPK1|STAT1|TGFB1|TGFBR1|TGFBR2	-13	MyList
GO Biological Processes	19	GO:1904951	positive regulation of establishment of protein localization	19_GO:0051179 localization	-14	11	13	30284	331	172	20	12	2.4	1432|1956|2064|2147|2932|3091|3458|3479|3553|5295|5468|5578|5599|5743|6721|7040|7099|7124|26229|27113	MAPK14|EGFR|ERBB2|F2|GSK3B|HIF1A|IFNG|IGF1|IL1B|PIK3R1|PPARG|PRKCA|MAPK8|PTGS2|SREBF2|TGFB1|TLR4|TNF|B3GAT3|BBC3	-13	MyList
GO Biological Processes	19	GO:0046660	female sex differentiation	19_GO:0022414 reproductive process	-14	21	17	30284	116	172	14	8.1	2.1	581|596|836|1588|2099|2255|2309|3815|4313|4323|4846|5241|6647|7422	BAX|BCL2|CASP3|CYP19A1|ESR1|FGF10|FOXO3|KIT|MMP2|MMP14|NOS3|PGR|SOD1|VEGFA	-13	MyList
GO Biological Processes	19	GO:0031669	cellular response to nutrient levels	19_GO:0050896 response to stimulus	-14	13	14	30284	249	172	18	10	2.3	213|355|596|857|1026|1513|2308|2309|2353|2475|3309|3480|4780|5594|5599|6667|6721|7157	ALB|FAS|BCL2|CAV1|CDKN1A|CTSK|FOXO1|FOXO3|FOS|MTOR|HSPA5|IGF1R|NFE2L2|MAPK1|MAPK8|SP1|SREBF2|TP53	-12	MyList
GO Biological Processes	19	GO:0001101	response to acid chemical	19_GO:0050896 response to stimulus	-14	18	16	30284	146	172	15	8.7	2.2	836|1786|1788|1906|1956|2475|3480|4313|4314|4780|5290|5743|5970|7124|7422	CASP3|DNMT1|DNMT3A|EDN1|EGFR|MTOR|IGF1R|MMP2|MMP3|NFE2L2|PIK3CA|PTGS2|RELA|TNF|VEGFA	-12	MyList
GO Biological Processes	19	GO:0050671	positive regulation of lymphocyte proliferation	19_GO:0002376 immune system process	-14	18	16	30284	147	172	15	8.7	2.2	596|1026|2255|3479|3553|3558|3569|3606|4282|6352|6850|7048|7099|7189|7412	BCL2|CDKN1A|FGF10|IGF1|IL1B|IL2|IL6|IL18|MIF|CCL5|SYK|TGFBR2|TLR4|TRAF6|VCAM1	-12	MyList
GO Biological Processes	19	GO:0016310	phosphorylation	19_GO:0009987 cellular process	-14	8.9	13	30284	433	172	22	13	2.5	207|673|1385|1432|1511|1956|2064|2260|2263|2321|2932|3480|3551|3815|5578|5594|5599|5894|6774|6850|7046|7099	AKT1|BRAF|CREB1|MAPK14|CTSG|EGFR|ERBB2|FGFR1|FGFR2|FLT1|GSK3B|IGF1R|IKBKB|KIT|PRKCA|MAPK1|MAPK8|RAF1|STAT3|SYK|TGFBR1|TLR4	-12	MyList
GO Biological Processes	19	GO:0051090	regulation of DNA-binding transcription factor activity	19_GO:0050789 regulation of biological process	-14	10	13	30284	338	172	20	12	2.4	207|367|655|1906|2099|2100|3551|3553|3569|3586|3606|3815|4792|5728|5970|6850|7099|7124|7189|114548	AKT1|AR|BMP7|EDN1|ESR1|ESR2|IKBKB|IL1B|IL6|IL10|IL18|KIT|NFKBIA|PTEN|RELA|SYK|TLR4|TNF|TRAF6|NLRP3	-12	MyList
GO Biological Processes	19	GO:0043009	chordate embryonic development	19_GO:0032502 developmental process	-14	7	12	30284	658	172	26	15	2.7	207|367|655|836|841|1026|1499|1906|1956|2260|2263|2821|3091|3586|3726|4323|4846|5594|5604|7040|7046|7048|7157|7189|7422|8061	AKT1|AR|BMP7|CASP3|CASP8|CDKN1A|CTNNB1|EDN1|EGFR|FGFR1|FGFR2|GPI|HIF1A|IL10|JUNB|MMP14|NOS3|MAPK1|MAP2K1|TGFB1|TGFBR1|TGFBR2|TP53|TRAF6|VEGFA|FOSL1	-12	MyList
GO Biological Processes	19	GO:0006468	protein phosphorylation	19_GO:0009987 cellular process	-14	9.5	13	30284	388	172	21	12	2.5	207|673|1385|1432|1511|1956|2064|2260|2263|2321|2932|3480|3551|3815|5578|5594|5599|5894|6850|7046|7099	AKT1|BRAF|CREB1|MAPK14|CTSG|EGFR|ERBB2|FGFR1|FGFR2|FLT1|GSK3B|IGF1R|IKBKB|KIT|PRKCA|MAPK1|MAPK8|RAF1|SYK|TGFBR1|TLR4	-12	MyList
GO Biological Processes	19	GO:1904707	positive regulation of vascular associated smooth muscle cell proliferation	19_GO:0048518 positive regulation of biological process	-14	37	20	30284	53	172	11	6.4	1.9	1786|1906|2247|2263|3479|3586|3725|4313|4318|7124|407006	DNMT1|EDN1|FGF2|FGFR2|IGF1|IL10|JUN|MMP2|MMP9|TNF|MIR221	-12	MyList
GO Biological Processes	19	GO:0043254	regulation of protein-containing complex assembly	19_GO:0050789 regulation of biological process	-14	8.8	12	30284	438	172	22	13	2.5	581|2475|2932|3309|3458|3958|4137|4233|4312|4314|5599|5781|5894|6403|6850|7040|7067|7099|7124|7157|7422|27113	BAX|MTOR|GSK3B|HSPA5|IFNG|LGALS3|MAPT|MET|MMP1|MMP3|MAPK8|PTPN11|RAF1|SELP|SYK|TGFB1|THRA|TLR4|TNF|TP53|VEGFA|BBC3	-12	MyList
GO Biological Processes	19	GO:0032946	positive regulation of mononuclear cell proliferation	19_GO:0048518 positive regulation of biological process	-14	18	15	30284	150	172	15	8.7	2.2	596|1026|2255|3479|3553|3558|3569|3606|4282|6352|6850|7048|7099|7189|7412	BCL2|CDKN1A|FGF10|IGF1|IL1B|IL2|IL6|IL18|MIF|CCL5|SYK|TGFBR2|TLR4|TRAF6|VCAM1	-12	MyList
GO Biological Processes	19	GO:0007173	epidermal growth factor receptor signaling pathway	19_GO:0050896 response to stimulus	-14	24	17	30284	95	172	13	7.6	2	207|673|1950|1956|2064|2260|2263|2321|3480|3815|4233|5290|5781	AKT1|BRAF|EGF|EGFR|ERBB2|FGFR1|FGFR2|FLT1|IGF1R|KIT|MET|PIK3CA|PTPN11	-12	MyList
GO Biological Processes	19	GO:0043122	regulation of canonical NF-kappaB signal transduction	19_GO:0050896 response to stimulus	-14	11	13	30284	300	172	19	11	2.4	142|834|841|857|920|1906|2099|2950|3551|3553|4792|5970|6772|6774|7040|7099|7124|7189|7422	PARP1|CASP1|CASP8|CAV1|CD4|EDN1|ESR1|GSTP1|IKBKB|IL1B|NFKBIA|RELA|STAT1|STAT3|TGFB1|TLR4|TNF|TRAF6|VEGFA	-12	MyList
GO Biological Processes	19	GO:0002687	positive regulation of leukocyte migration	19_GO:0040011 locomotion	-14	17	15	30284	152	172	15	8.7	2.2	1906|3569|3627|3958|4323|5228|5295|5594|6352|6387|6403|6868|7040|7124|7422	EDN1|IL6|CXCL10|LGALS3|MMP14|PGF|PIK3R1|MAPK1|CCL5|CXCL12|SELP|ADAM17|TGFB1|TNF|VEGFA	-12	MyList
GO Biological Processes	19	GO:0009615	response to virus	19_GO:0044419 biological process involved in interspecies interaction between organisms	-14	9.4	13	30284	394	172	21	12	2.5	581|596|834|1432|3091|3458|3551|3569|3627|4321|4790|5970|6352|6367|6387|6772|7040|7124|7189|8061|114548	BAX|BCL2|CASP1|MAPK14|HIF1A|IFNG|IKBKB|IL6|CXCL10|MMP12|NFKB1|RELA|CCL5|CCL22|CXCL12|STAT1|TGFB1|TNF|TRAF6|FOSL1|NLRP3	-12	MyList
GO Biological Processes	19	GO:0071260	cellular response to mechanical stimulus	19_GO:0050896 response to stimulus	-14	29	18	30284	74	172	12	7	1.9	355|834|841|1956|2247|3480|3553|4790|5599|5743|7040|7099	FAS|CASP1|CASP8|EGFR|FGF2|IGF1R|IL1B|NFKB1|MAPK8|PTGS2|TGFB1|TLR4	-12	MyList
GO Biological Processes	19	GO:0008585	female gonad development	19_GO:0022414 reproductive process	-14	24	17	30284	97	172	13	7.6	2	581|596|836|1588|2099|2309|3815|4313|4323|4846|5241|6647|7422	BAX|BCL2|CASP3|CYP19A1|ESR1|FOXO3|KIT|MMP2|MMP14|NOS3|PGR|SOD1|VEGFA	-12	MyList
GO Biological Processes	19	GO:0002764	immune response-regulating signaling pathway	19_GO:0002376 immune system process	-14	9.4	13	30284	395	172	21	12	2.5	581|596|673|834|1520|3458|3551|3815|4790|4792|4843|5290|5594|5599|5970|6850|7099|7124|7189|8061|114548	BAX|BCL2|BRAF|CASP1|CTSS|IFNG|IKBKB|KIT|NFKB1|NFKBIA|NOS2|PIK3CA|MAPK1|MAPK8|RELA|SYK|TLR4|TNF|TRAF6|FOSL1|NLRP3	-12	MyList
GO Biological Processes	19	GO:0002253	activation of immune response	19_GO:0002376 immune system process	-14	9.3	13	30284	396	172	21	12	2.5	581|596|673|715|716|834|1520|3458|3551|4790|4792|4843|5290|5594|5970|6850|7099|7124|7189|8061|114548	BAX|BCL2|BRAF|C1R|C1S|CASP1|CTSS|IFNG|IKBKB|NFKB1|NFKBIA|NOS2|PIK3CA|MAPK1|RELA|SYK|TLR4|TNF|TRAF6|FOSL1|NLRP3	-12	MyList
GO Biological Processes	19	GO:0048608	reproductive structure development	19_GO:0022414 reproductive process	-14	11	13	30284	304	172	19	11	2.4	367|581|596|836|1499|1588|2099|2255|2263|2309|3815|4313|4323|4846|5241|5781|6647|7046|7422	AR|BAX|BCL2|CASP3|CTNNB1|CYP19A1|ESR1|FGF10|FGFR2|FOXO3|KIT|MMP2|MMP14|NOS3|PGR|PTPN11|SOD1|TGFBR1|VEGFA	-12	MyList
GO Biological Processes	19	GO:0046883	regulation of hormone secretion	19_GO:0051179 localization	-14	12	14	30284	262	172	18	10	2.3	240|1385|1588|1906|1956|2147|2260|2308|3091|3458|3553|3569|4843|5468|5578|5781|6352|7124	ALOX5|CREB1|CYP19A1|EDN1|EGFR|F2|FGFR1|FOXO1|HIF1A|IFNG|IL1B|IL6|NOS2|PPARG|PRKCA|PTPN11|CCL5|TNF	-12	MyList
GO Biological Processes	19	GO:0071496	cellular response to external stimulus	19_GO:0050896 response to stimulus	-14	28	18	30284	75	172	12	7	1.9	355|834|841|1956|2247|3480|3553|4790|5599|5743|7040|7099	FAS|CASP1|CASP8|EGFR|FGF2|IGF1R|IL1B|NFKB1|MAPK8|PTGS2|TGFB1|TLR4	-12	MyList
GO Biological Processes	19	GO:0001959	regulation of cytokine-mediated signaling pathway	19_GO:0050896 response to stimulus	-14	15	14	30284	189	172	16	9.3	2.2	834|841|857|1906|2950|3091|3551|3569|4317|4321|5468|5781|6352|6850|6868|10062	CASP1|CASP8|CAV1|EDN1|GSTP1|HIF1A|IKBKB|IL6|MMP8|MMP12|PPARG|PTPN11|CCL5|SYK|ADAM17|NR1H3	-12	MyList
GO Biological Processes	19	GO:0046649	lymphocyte activation	19_GO:0002376 immune system process	-14	8	12	30284	504	172	23	13	2.6	581|596|673|841|920|1499|1803|2064|2475|3558|3569|3586|3606|3815|5294|5295|6774|6850|6868|7040|7099|7157|7412	BAX|BCL2|BRAF|CASP8|CD4|CTNNB1|DPP4|ERBB2|MTOR|IL2|IL6|IL10|IL18|KIT|PIK3CG|PIK3R1|STAT3|SYK|ADAM17|TGFB1|TLR4|TP53|VCAM1	-12	MyList
GO Biological Processes	19	GO:0061458	reproductive system development	19_GO:0032502 developmental process	-14	11	13	30284	308	172	19	11	2.4	367|581|596|836|1499|1588|2099|2255|2263|2309|3815|4313|4323|4846|5241|5781|6647|7046|7422	AR|BAX|BCL2|CASP3|CTNNB1|CYP19A1|ESR1|FGF10|FGFR2|FOXO3|KIT|MMP2|MMP14|NOS3|PGR|PTPN11|SOD1|TGFBR1|VEGFA	-12	MyList
GO Biological Processes	19	GO:0032368	regulation of lipid transport	19_GO:0051179 localization	-14	17	15	30284	157	172	15	8.7	2.2	207|857|1588|1906|1950|3553|3685|4282|4790|4792|5468|5781|6721|6850|10062	AKT1|CAV1|CYP19A1|EDN1|EGF|IL1B|ITGAV|MIF|NFKB1|NFKBIA|PPARG|PTPN11|SREBF2|SYK|NR1H3	-12	MyList
GO Biological Processes	19	GO:0043535	regulation of blood vessel endothelial cell migration	19_GO:0040011 locomotion	-14	17	15	30284	157	172	15	8.7	2.2	207|2247|2260|3091|4780|4846|5468|5578|5743|6667|6868|7040|7124|7422|407006	AKT1|FGF2|FGFR1|HIF1A|NFE2L2|NOS3|PPARG|PRKCA|PTGS2|SP1|ADAM17|TGFB1|TNF|VEGFA|MIR221	-12	MyList
GO Biological Processes	19	GO:0046545	development of primary female sexual characteristics	19_GO:0022414 reproductive process	-14	23	16	30284	101	172	13	7.6	2	581|596|836|1588|2099|2309|3815|4313|4323|4846|5241|6647|7422	BAX|BCL2|CASP3|CYP19A1|ESR1|FOXO3|KIT|MMP2|MMP14|NOS3|PGR|SOD1|VEGFA	-12	MyList
GO Biological Processes	19	GO:0034614	cellular response to reactive oxygen species	19_GO:0050896 response to stimulus	-14	19	16	30284	129	172	14	8.1	2.1	847|1906|2353|3569|4137|4313|4314|4353|4780|4846|5599|5970|6647|6648	CAT|EDN1|FOS|IL6|MAPT|MMP2|MMP3|MPO|NFE2L2|NOS3|MAPK8|RELA|SOD1|SOD2	-12	MyList
GO Biological Processes	19	GO:0001558	regulation of cell growth	19_GO:0040007 growth	-14	9	12	30284	410	172	21	12	2.5	207|596|627|1026|1906|1956|2064|2100|2147|2475|2932|3479|3558|4137|4323|6387|6868|7040|7046|7157|7422	AKT1|BCL2|BDNF|CDKN1A|EDN1|EGFR|ERBB2|ESR2|F2|MTOR|GSK3B|IGF1|IL2|MAPT|MMP14|CXCL12|ADAM17|TGFB1|TGFBR1|TP53|VEGFA	-12	MyList
GO Biological Processes	19	GO:0043200	response to amino acid	19_GO:0050896 response to stimulus	-14	19	15	30284	131	172	14	8.1	2.1	836|1786|1788|1906|1956|2475|3480|4313|4314|4780|5290|5743|5970|7124	CASP3|DNMT1|DNMT3A|EDN1|EGFR|MTOR|IGF1R|MMP2|MMP3|NFE2L2|PIK3CA|PTGS2|RELA|TNF	-12	MyList
GO Biological Processes	19	GO:0044092	negative regulation of molecular function	19_GO:0065007 biological regulation	-14	6.9	11	30284	634	172	25	15	2.7	207|581|655|857|1026|2099|2932|2950|3553|3586|3685|3725|4233|4318|4790|4792|5468|5599|5728|5894|7076|7077|7124|7157|7422	AKT1|BAX|BMP7|CAV1|CDKN1A|ESR1|GSK3B|GSTP1|IL1B|IL10|ITGAV|JUN|MET|MMP9|NFKB1|NFKBIA|PPARG|MAPK8|PTEN|RAF1|TIMP1|TIMP2|TNF|TP53|VEGFA	-12	MyList
GO Biological Processes	19	GO:0003013	circulatory system process	19_GO:0032501 multicellular organismal process	-14	7.8	12	30284	519	172	23	13	2.6	367|857|875|1511|1906|1956|2475|3627|4313|4843|4846|4883|5290|5468|5742|5743|6387|6647|6648|6772|7040|7124|7422	AR|CAV1|CBS|CTSG|EDN1|EGFR|MTOR|CXCL10|MMP2|NOS2|NOS3|NPR3|PIK3CA|PPARG|PTGS1|PTGS2|CXCL12|SOD1|SOD2|STAT1|TGFB1|TNF|VEGFA	-12	MyList
GO Biological Processes	19	GO:0048010	vascular endothelial growth factor receptor signaling pathway	19_GO:0050896 response to stimulus	-13	26	17	30284	80	172	12	7	1.9	1432|1956|2064|2255|2260|2263|2321|3480|3815|4233|5228|7422	MAPK14|EGFR|ERBB2|FGF10|FGFR1|FGFR2|FLT1|IGF1R|KIT|MET|PGF|VEGFA	-12	MyList
GO Biological Processes	19	GO:0070374	positive regulation of ERK1 and ERK2 cascade	19_GO:0048518 positive regulation of biological process	-13	14	14	30284	198	172	16	9.3	2.2	673|920|1956|2247|2255|2263|3479|4282|5320|5578|5604|5781|7040|7099|7124|7422	BRAF|CD4|EGFR|FGF2|FGF10|FGFR2|IGF1|MIF|PLA2G2A|PRKCA|MAP2K1|PTPN11|TGFB1|TLR4|TNF|VEGFA	-12	MyList
GO Biological Processes	19	GO:0019725	cellular homeostasis	19_GO:0042592 homeostatic process	-13	6.5	11	30284	703	172	26	15	2.7	581|596|760|857|1906|1991|2147|2308|2309|2936|2950|3091|3480|3569|4780|4843|4846|5290|5295|5594|5894|6352|6387|6647|6648|7040	BAX|BCL2|CA2|CAV1|EDN1|ELANE|F2|FOXO1|FOXO3|GSR|GSTP1|HIF1A|IGF1R|IL6|NFE2L2|NOS2|NOS3|PIK3CA|PIK3R1|MAPK1|RAF1|CCL5|CXCL12|SOD1|SOD2|TGFB1	-12	MyList
GO Biological Processes	19	GO:0044057	regulation of system process	19_GO:0032501 multicellular organismal process	-13	7.2	12	30284	584	172	24	14	2.6	142|857|1588|1890|1906|1956|2255|2260|2308|2309|3479|3815|4313|4846|5294|5468|5578|5728|5743|5781|6647|7067|7124|10062	PARP1|CAV1|CYP19A1|TYMP|EDN1|EGFR|FGF10|FGFR1|FOXO1|FOXO3|IGF1|KIT|MMP2|NOS3|PIK3CG|PPARG|PRKCA|PTEN|PTGS2|PTPN11|SOD1|THRA|TNF|NR1H3	-12	MyList
GO Biological Processes	19	GO:0030098	lymphocyte differentiation	19_GO:0002376 immune system process	-13	11	13	30284	280	172	18	10	2.3	581|596|673|920|1499|2064|2475|3558|3569|3586|3815|5295|6774|6850|6868|7040|7157|7412	BAX|BCL2|BRAF|CD4|CTNNB1|ERBB2|MTOR|IL2|IL6|IL10|KIT|PIK3R1|STAT3|SYK|ADAM17|TGFB1|TP53|VCAM1	-12	MyList
GO Biological Processes	19	GO:0002252	immune effector process	19_GO:0002376 immune system process	-13	8.2	12	30284	474	172	22	13	2.5	715|716|1511|1991|2147|2475|3458|3558|3569|3606|3815|4353|4843|5294|5295|6774|6850|6868|7099|7124|7157|54210	C1R|C1S|CTSG|ELANE|F2|MTOR|IFNG|IL2|IL6|IL18|KIT|MPO|NOS2|PIK3CG|PIK3R1|STAT3|SYK|ADAM17|TLR4|TNF|TP53|TREM1	-12	MyList
GO Biological Processes	19	GO:0002757	immune response-activating signaling pathway	19_GO:0002376 immune system process	-13	10	13	30284	330	172	19	11	2.4	581|596|673|834|1520|3458|3551|4790|4792|4843|5290|5594|5970|6850|7099|7124|7189|8061|114548	BAX|BCL2|BRAF|CASP1|CTSS|IFNG|IKBKB|NFKB1|NFKBIA|NOS2|PIK3CA|MAPK1|RELA|SYK|TLR4|TNF|TRAF6|FOSL1|NLRP3	-12	MyList
GO Biological Processes	19	GO:0002833	positive regulation of response to biotic stimulus	19_GO:0048518 positive regulation of biological process	-13	10	13	30284	332	172	19	11	2.4	834|857|1520|3551|4282|4321|4792|5578|5599|5781|5970|6352|6850|7099|7124|7189|8061|10062|114548	CASP1|CAV1|CTSS|IKBKB|MIF|MMP12|NFKBIA|PRKCA|MAPK8|PTPN11|RELA|CCL5|SYK|TLR4|TNF|TRAF6|FOSL1|NR1H3|NLRP3	-11	MyList
GO Biological Processes	19	GO:0048008	platelet-derived growth factor receptor signaling pathway	19_GO:0050896 response to stimulus	-13	25	17	30284	85	172	12	7	1.9	1956|2064|2260|2263|2321|3480|3815|4233|5327|5781|7422|407006	EGFR|ERBB2|FGFR1|FGFR2|FLT1|IGF1R|KIT|MET|PLAT|PTPN11|VEGFA|MIR221	-11	MyList
GO Biological Processes	19	GO:0007548	sex differentiation	19_GO:0022414 reproductive process	-13	11	13	30284	289	172	18	10	2.3	367|581|596|836|1499|1588|2099|2255|2309|3815|4313|4323|4846|5241|5781|6647|7046|7422	AR|BAX|BCL2|CASP3|CTNNB1|CYP19A1|ESR1|FGF10|FOXO3|KIT|MMP2|MMP14|NOS3|PGR|PTPN11|SOD1|TGFBR1|VEGFA	-11	MyList
GO Biological Processes	19	GO:0061041	regulation of wound healing	19_GO:0050896 response to stimulus	-13	18	15	30284	140	172	14	8.1	2.1	240|857|1906|2147|2191|2247|2475|4780|4846|5327|5328|5728|7124|407006	ALOX5|CAV1|EDN1|F2|FAP|FGF2|MTOR|NFE2L2|NOS3|PLAT|PLAU|PTEN|TNF|MIR221	-11	MyList
GO Biological Processes	19	GO:0060485	mesenchyme development	19_GO:0032502 developmental process	-13	12	13	30284	248	172	17	9.9	2.3	596|655|1000|1499|1906|2255|2260|2263|2932|3091|3479|4846|5594|6772|7040|7046|7048	BCL2|BMP7|CDH2|CTNNB1|EDN1|FGF10|FGFR1|FGFR2|GSK3B|HIF1A|IGF1|NOS3|MAPK1|STAT1|TGFB1|TGFBR1|TGFBR2	-11	MyList
GO Biological Processes	19	GO:0033273	response to vitamin	19_GO:0050896 response to stimulus	-13	25	17	30284	86	172	12	7	1.9	655|847|875|1788|1956|3480|3627|5009|5743|5970|6648|7040	BMP7|CAT|CBS|DNMT3A|EGFR|IGF1R|CXCL10|OTC|PTGS2|RELA|SOD2|TGFB1	-11	MyList
GO Biological Processes	19	GO:0042110	T cell activation	19_GO:0002376 immune system process	-13	9.9	12	30284	339	172	19	11	2.4	581|596|673|841|920|1499|1803|2064|2475|3558|3569|3815|5294|5295|6774|6850|6868|7040|7157	BAX|BCL2|BRAF|CASP8|CD4|CTNNB1|DPP4|ERBB2|MTOR|IL2|IL6|KIT|PIK3CG|PIK3R1|STAT3|SYK|ADAM17|TGFB1|TP53	-11	MyList
GO Biological Processes	19	GO:0045428	regulation of nitric oxide biosynthetic process	19_GO:0050789 regulation of biological process	-13	30	18	30284	65	172	11	6.4	1.9	207|857|1906|2099|3458|3553|3586|5743|6648|7099|7124	AKT1|CAV1|EDN1|ESR1|IFNG|IL1B|IL10|PTGS2|SOD2|TLR4|TNF	-11	MyList
GO Biological Processes	19	GO:0010212	response to ionizing radiation	19_GO:0050896 response to stimulus	-13	17	15	30284	143	172	14	8.1	2.1	142|581|596|836|1026|1432|1788|3627|6648|7040|7124|7157|7412|27113	PARP1|BAX|BCL2|CASP3|CDKN1A|MAPK14|DNMT3A|CXCL10|SOD2|TGFB1|TNF|TP53|VCAM1|BBC3	-11	MyList
GO Biological Processes	19	GO:1903532	positive regulation of secretion by cell	19_GO:0051179 localization	-13	11	13	30284	297	172	18	10	2.3	1385|1588|1906|1956|2147|2260|3091|3458|3479|3553|4282|5468|5578|5781|6387|6850|7040|7099	CREB1|CYP19A1|EDN1|EGFR|F2|FGFR1|HIF1A|IFNG|IGF1|IL1B|MIF|PPARG|PRKCA|PTPN11|CXCL12|SYK|TGFB1|TLR4	-11	MyList
GO Biological Processes	19	GO:0045787	positive regulation of cell cycle	19_GO:0048518 positive regulation of biological process	-13	9.8	12	30284	343	172	19	11	2.4	207|595|1906|1950|1956|2255|2260|2263|3479|3480|3553|3586|5578|5781|6868|7040|7124|8061|407006	AKT1|CCND1|EDN1|EGF|EGFR|FGF10|FGFR1|FGFR2|IGF1|IGF1R|IL1B|IL10|PRKCA|PTPN11|ADAM17|TGFB1|TNF|FOSL1|MIR221	-11	MyList
GO Biological Processes	19	GO:0050921	positive regulation of chemotaxis	19_GO:0040011 locomotion	-13	17	15	30284	146	172	14	8.1	2.1	1906|2247|2255|2260|3569|3627|4233|5228|5594|6352|6387|6868|7040|7422	EDN1|FGF2|FGF10|FGFR1|IL6|CXCL10|MET|PGF|MAPK1|CCL5|CXCL12|ADAM17|TGFB1|VEGFA	-11	MyList
GO Biological Processes	19	GO:0080164	regulation of nitric oxide metabolic process	19_GO:0050789 regulation of biological process	-13	29	17	30284	67	172	11	6.4	1.9	207|857|1906|2099|3458|3553|3586|5743|6648|7099|7124	AKT1|CAV1|EDN1|ESR1|IFNG|IL1B|IL10|PTGS2|SOD2|TLR4|TNF	-11	MyList
GO Biological Processes	19	GO:1902175	regulation of oxidative stress-induced intrinsic apoptotic signaling pathway	19_GO:0050896 response to stimulus	-13	37	19	30284	48	172	10	5.8	1.8	142|207|1499|2247|3091|3586|4313|4780|6647|6648	PARP1|AKT1|CTNNB1|FGF2|HIF1A|IL10|MMP2|NFE2L2|SOD1|SOD2	-11	MyList
GO Biological Processes	19	GO:0007420	brain development	19_GO:0032502 developmental process	-13	6.1	11	30284	745	172	26	15	2.7	581|596|655|836|875|1000|1385|1499|1950|1956|2247|2255|2260|2263|2309|2353|2932|3091|3309|3480|5604|5728|5781|6387|7048|7157	BAX|BCL2|BMP7|CASP3|CBS|CDH2|CREB1|CTNNB1|EGF|EGFR|FGF2|FGF10|FGFR1|FGFR2|FOXO3|FOS|GSK3B|HIF1A|HSPA5|IGF1R|MAP2K1|PTEN|PTPN11|CXCL12|TGFBR2|TP53	-11	MyList
GO Biological Processes	19	GO:1905953	negative regulation of lipid localization	19_GO:0051179 localization	-13	28	17	30284	69	172	11	6.4	1.9	207|1950|3569|3685|4790|4792|5468|5781|6721|7124|10062	AKT1|EGF|IL6|ITGAV|NFKB1|NFKBIA|PPARG|PTPN11|SREBF2|TNF|NR1H3	-11	MyList
GO Biological Processes	19	GO:0043525	positive regulation of neuron apoptotic process	19_GO:0048518 positive regulation of biological process	-13	28	17	30284	69	172	11	6.4	1.9	581|836|841|1499|2309|2908|2932|4313|7124|7157|27113	BAX|CASP3|CASP8|CTNNB1|FOXO3|NR3C1|GSK3B|MMP2|TNF|TP53|BBC3	-11	MyList
GO Biological Processes	19	GO:0001501	skeletal system development	19_GO:0032502 developmental process	-13	7.6	11	30284	511	172	22	13	2.5	655|875|1432|1499|1906|2247|2260|2263|3091|3479|4313|4318|4322|4323|4883|7040|7046|7048|7067|7076|7157|7422	BMP7|CBS|MAPK14|CTNNB1|EDN1|FGF2|FGFR1|FGFR2|HIF1A|IGF1|MMP2|MMP9|MMP13|MMP14|NPR3|TGFB1|TGFBR1|TGFBR2|THRA|TIMP1|TP53|VEGFA	-11	MyList
GO Biological Processes	19	GO:0051336	regulation of hydrolase activity	19_GO:0065007 biological regulation	-13	8.1	12	30284	457	172	21	12	2.5	207|355|834|841|2260|2263|2932|3458|4233|4318|5894|6352|6647|6774|7076|7077|7124|7422|7498|10062|27113	AKT1|FAS|CASP1|CASP8|FGFR1|FGFR2|GSK3B|IFNG|MET|MMP9|RAF1|CCL5|SOD1|STAT3|TIMP1|TIMP2|TNF|VEGFA|XDH|NR1H3|BBC3	-11	MyList
GO Biological Processes	19	GO:0043491	phosphatidylinositol 3-kinase/protein kinase B signal transduction	19_GO:0050896 response to stimulus	-13	28	17	30284	70	172	11	6.4	1.9	207|1906|2064|2247|3480|5290|5294|5295|5728|6774|7124	AKT1|EDN1|ERBB2|FGF2|IGF1R|PIK3CA|PIK3CG|PIK3R1|PTEN|STAT3|TNF	-11	MyList
GO Biological Processes	19	GO:0030217	T cell differentiation	19_GO:0002376 immune system process	-13	14	14	30284	187	172	15	8.7	2.2	596|673|920|1499|2064|2475|3558|3569|3815|5295|6774|6850|6868|7040|7157	BCL2|BRAF|CD4|CTNNB1|ERBB2|MTOR|IL2|IL6|KIT|PIK3R1|STAT3|SYK|ADAM17|TGFB1|TP53	-11	MyList
GO Biological Processes	19	GO:0007162	negative regulation of cell adhesion	19_GO:0048519 negative regulation of biological process	-13	10	12	30284	312	172	18	10	2.3	207|836|1511|2064|3558|3586|3958|4313|4321|4323|5295|5320|5728|5781|6387|7040|7422|407006	AKT1|CASP3|CTSG|ERBB2|IL2|IL10|LGALS3|MMP2|MMP12|MMP14|PIK3R1|PLA2G2A|PTEN|PTPN11|CXCL12|TGFB1|VEGFA|MIR221	-11	MyList
GO Biological Processes	19	GO:0043406	positive regulation of MAP kinase activity	19_GO:0048518 positive regulation of biological process	-13	27	17	30284	71	172	11	6.4	1.9	1906|1991|2064|2247|2260|2321|3553|5294|7099|7124|7189	EDN1|ELANE|ERBB2|FGF2|FGFR1|FLT1|IL1B|PIK3CG|TLR4|TNF|TRAF6	-11	MyList
GO Biological Processes	19	GO:2000106	regulation of leukocyte apoptotic process	19_GO:0050789 regulation of biological process	-13	22	16	30284	95	172	12	7	1.9	581|596|3091|3558|3586|3958|4282|6352|6387|6868|7157|27113	BAX|BCL2|HIF1A|IL2|IL10|LGALS3|MIF|CCL5|CXCL12|ADAM17|TP53|BBC3	-11	MyList
GO Biological Processes	19	GO:0051353	positive regulation of oxidoreductase activity	19_GO:0065007 biological regulation	-13	45	20	30284	35	172	9	5.2	1.7	207|1906|2099|3091|3458|3553|4883|5447|7124	AKT1|EDN1|ESR1|HIF1A|IFNG|IL1B|NPR3|POR|TNF	-11	MyList
GO Biological Processes	19	GO:0010660	regulation of muscle cell apoptotic process	19_GO:0050789 regulation of biological process	-13	22	16	30284	96	172	12	7	1.9	655|1786|1906|2099|2308|3458|3479|3480|4780|5468|6648|7157	BMP7|DNMT1|EDN1|ESR1|FOXO1|IFNG|IGF1|IGF1R|NFE2L2|PPARG|SOD2|TP53	-11	MyList
GO Biological Processes	19	GO:0051051	negative regulation of transport	19_GO:0051179 localization	-12	7.9	11	30284	467	172	21	12	2.5	207|596|673|857|1906|1950|2308|3156|3553|3685|3958|4318|4790|4846|5728|5743|5781|6721|7040|7124|10062	AKT1|BCL2|BRAF|CAV1|EDN1|EGF|FOXO1|HMGCR|IL1B|ITGAV|LGALS3|MMP9|NFKB1|NOS3|PTEN|PTGS2|PTPN11|SREBF2|TGFB1|TNF|NR1H3	-11	MyList
GO Biological Processes	19	GO:0062013	positive regulation of small molecule metabolic process	19_GO:0048518 positive regulation of biological process	-12	16	14	30284	157	172	14	8.1	2.1	207|2308|2475|3091|3458|3479|3553|4846|5468|5594|5743|6721|7124|10062	AKT1|FOXO1|MTOR|HIF1A|IFNG|IGF1|IL1B|NOS3|PPARG|MAPK1|PTGS2|SREBF2|TNF|NR1H3	-11	MyList
GO Biological Processes	19	GO:0032722	positive regulation of chemokine production	19_GO:0032501 multicellular organismal process	-12	27	17	30284	73	172	11	6.4	1.9	3091|3458|3553|3569|3606|4282|6850|6868|7040|7099|7124	HIF1A|IFNG|IL1B|IL6|IL18|MIF|SYK|ADAM17|TGFB1|TLR4|TNF	-11	MyList
GO Biological Processes	19	GO:0043269	regulation of monoatomic ion transport	19_GO:0051179 localization	-12	7.8	11	30284	472	172	21	12	2.5	207|581|596|760|857|920|1499|1520|1906|1950|2147|3458|3627|3958|4318|4846|5294|5743|6352|6387|7040	AKT1|BAX|BCL2|CA2|CAV1|CD4|CTNNB1|CTSS|EDN1|EGF|F2|IFNG|CXCL10|LGALS3|MMP9|NOS3|PIK3CG|PTGS2|CCL5|CXCL12|TGFB1	-11	MyList
GO Biological Processes	19	GO:0035094	response to nicotine	19_GO:0050896 response to stimulus	-12	33	18	30284	53	172	10	5.8	1.8	596|836|1906|3480|4313|4790|5594|5970|7124|7412	BCL2|CASP3|EDN1|IGF1R|MMP2|NFKB1|MAPK1|RELA|TNF|VCAM1	-11	MyList
GO Biological Processes	19	GO:0060688	regulation of morphogenesis of a branching structure	19_GO:0032502 developmental process	-12	33	18	30284	53	172	10	5.8	1.8	367|655|1499|2099|2255|2260|2263|7040|7124|7422	AR|BMP7|CTNNB1|ESR1|FGF10|FGFR1|FGFR2|TGFB1|TNF|VEGFA	-11	MyList
GO Biological Processes	19	GO:0051047	positive regulation of secretion	19_GO:0051179 localization	-12	9.9	12	30284	321	172	18	10	2.3	1385|1588|1906|1956|2147|2260|3091|3458|3479|3553|4282|5468|5578|5781|6387|6850|7040|7099	CREB1|CYP19A1|EDN1|EGFR|F2|FGFR1|HIF1A|IFNG|IGF1|IL1B|MIF|PPARG|PRKCA|PTPN11|CXCL12|SYK|TGFB1|TLR4	-11	MyList
GO Biological Processes	19	GO:0040013	negative regulation of locomotion	19_GO:0040011 locomotion	-12	8.4	12	30284	421	172	20	12	2.4	207|596|673|1588|1803|1991|2247|2309|2932|4282|4780|5468|5728|6387|6774|7040|7046|7076|7124|407006	AKT1|BCL2|BRAF|CYP19A1|DPP4|ELANE|FGF2|FOXO3|GSK3B|MIF|NFE2L2|PPARG|PTEN|CXCL12|STAT3|TGFB1|TGFBR1|TIMP1|TNF|MIR221	-11	MyList
GO Biological Processes	19	GO:1904018	positive regulation of vasculature development	19_GO:0032502 developmental process	-12	14	13	30284	195	172	15	8.7	2.2	2247|2321|3091|3553|3586|4780|4846|5578|6387|6667|6774|7040|7046|7048|7422	FGF2|FLT1|HIF1A|IL1B|IL10|NFE2L2|NOS3|PRKCA|CXCL12|SP1|STAT3|TGFB1|TGFBR1|TGFBR2|VEGFA	-11	MyList
GO Biological Processes	19	GO:0042542	response to hydrogen peroxide	19_GO:0050896 response to stimulus	-12	21	15	30284	99	172	12	7	1.9	596|836|847|1906|3569|4313|4780|5970|6647|6648|6772|8061	BCL2|CASP3|CAT|EDN1|IL6|MMP2|NFE2L2|RELA|SOD1|SOD2|STAT1|FOSL1	-11	MyList
GO Biological Processes	19	GO:0007346	regulation of mitotic cell cycle	19_GO:0050789 regulation of biological process	-12	7.3	11	30284	533	172	22	13	2.5	207|595|596|655|1026|1499|1906|1950|1956|2255|2260|3479|3553|3586|5578|5728|5781|6868|7040|7124|7157|407006	AKT1|CCND1|BCL2|BMP7|CDKN1A|CTNNB1|EDN1|EGF|EGFR|FGF10|FGFR1|IGF1|IL1B|IL10|PRKCA|PTEN|PTPN11|ADAM17|TGFB1|TNF|TP53|MIR221	-11	MyList
GO Biological Processes	19	GO:0034762	regulation of transmembrane transport	19_GO:0051179 localization	-12	7.7	11	30284	478	172	21	12	2.5	207|581|596|673|760|857|1432|1520|1906|2147|3458|3479|3553|3627|4318|4780|5294|5295|5781|7040|7124	AKT1|BAX|BCL2|BRAF|CA2|CAV1|MAPK14|CTSS|EDN1|F2|IFNG|IGF1|IL1B|CXCL10|MMP9|NFE2L2|PIK3CG|PIK3R1|PTPN11|TGFB1|TNF	-11	MyList
GO Biological Processes	19	GO:0032768	regulation of monooxygenase activity	19_GO:0065007 biological regulation	-12	43	19	30284	37	172	9	5.2	1.7	207|2099|3091|3458|3553|4790|4883|5447|7124	AKT1|ESR1|HIF1A|IFNG|IL1B|NFKB1|NPR3|POR|TNF	-11	MyList
GO Biological Processes	19	GO:0030198	extracellular matrix organization	19_GO:0009987 cellular process	-12	11	12	30284	280	172	17	9.9	2.3	857|1511|1513|1520|1991|4312|4313|4314|4316|4317|4318|4321|4322|4323|7040|7046|7124	CAV1|CTSG|CTSK|CTSS|ELANE|MMP1|MMP2|MMP3|MMP7|MMP8|MMP9|MMP12|MMP13|MMP14|TGFB1|TGFBR1|TNF	-11	MyList
GO Biological Processes	19	GO:0002761	regulation of myeloid leukocyte differentiation	19_GO:0002376 immune system process	-12	18	14	30284	130	172	13	7.6	2	841|920|1385|1499|2353|2475|3458|5295|5578|7040|7099|7124|7189	CASP8|CD4|CREB1|CTNNB1|FOS|MTOR|IFNG|PIK3R1|PRKCA|TGFB1|TLR4|TNF|TRAF6	-11	MyList
GO Biological Processes	19	GO:0043062	extracellular structure organization	19_GO:0009987 cellular process	-12	11	12	30284	281	172	17	9.9	2.3	857|1511|1513|1520|1991|4312|4313|4314|4316|4317|4318|4321|4322|4323|7040|7046|7124	CAV1|CTSG|CTSK|CTSS|ELANE|MMP1|MMP2|MMP3|MMP7|MMP8|MMP9|MMP12|MMP13|MMP14|TGFB1|TGFBR1|TNF	-11	MyList
GO Biological Processes	19	GO:0071560	cellular response to transforming growth factor beta stimulus	19_GO:0050896 response to stimulus	-12	15	14	30284	163	172	14	8.1	2.1	142|857|1513|1906|2263|2353|2908|3480|3725|6774|7040|7046|7048|7157	PARP1|CAV1|CTSK|EDN1|FGFR2|FOS|NR3C1|IGF1R|JUN|STAT3|TGFB1|TGFBR1|TGFBR2|TP53	-11	MyList
GO Biological Processes	19	GO:0032770	positive regulation of monooxygenase activity	19_GO:0065007 biological regulation	-12	59	21	30284	24	172	8	4.7	1.6	207|2099|3091|3458|3553|4883|5447|7124	AKT1|ESR1|HIF1A|IFNG|IL1B|NPR3|POR|TNF	-11	MyList
GO Biological Processes	19	GO:0045229	external encapsulating structure organization	19_GO:0009987 cellular process	-12	11	12	30284	282	172	17	9.9	2.3	857|1511|1513|1520|1991|4312|4313|4314|4316|4317|4318|4321|4322|4323|7040|7046|7124	CAV1|CTSG|CTSK|CTSS|ELANE|MMP1|MMP2|MMP3|MMP7|MMP8|MMP9|MMP12|MMP13|MMP14|TGFB1|TGFBR1|TNF	-11	MyList
GO Biological Processes	19	GO:0035270	endocrine system development	19_GO:0032502 developmental process	-12	17	14	30284	131	172	13	7.6	2	673|1000|1385|1906|2247|2255|2908|3569|5594|5604|5894|7046|7067	BRAF|CDH2|CREB1|EDN1|FGF2|FGF10|NR3C1|IL6|MAPK1|MAP2K1|RAF1|TGFBR1|THRA	-11	MyList
GO Biological Processes	19	GO:0045471	response to ethanol	19_GO:0050896 response to stimulus	-12	17	14	30284	131	172	13	7.6	2	841|847|1513|1788|2247|2263|2353|3480|3558|6647|6648|7124|7412	CASP8|CAT|CTSK|DNMT3A|FGF2|FGFR2|FOS|IGF1R|IL2|SOD1|SOD2|TNF|VCAM1	-11	MyList
GO Biological Processes	19	GO:0048534	hematopoietic or lymphoid organ development	19_GO:0002376 immune system process	-12	21	15	30284	102	172	12	7	1.9	596|673|1499|2255|5594|5604|5894|6647|6868|7040|7046|7157	BCL2|BRAF|CTNNB1|FGF10|MAPK1|MAP2K1|RAF1|SOD1|ADAM17|TGFB1|TGFBR1|TP53	-11	MyList
GO Biological Processes	19	GO:0008543	fibroblast growth factor receptor signaling pathway	19_GO:0050896 response to stimulus	-12	21	15	30284	103	172	12	7	1.9	1499|1956|2064|2247|2255|2260|2263|2321|3480|3815|4233|5781	CTNNB1|EGFR|ERBB2|FGF2|FGF10|FGFR1|FGFR2|FLT1|IGF1R|KIT|MET|PTPN11	-10	MyList
GO Biological Processes	19	GO:0010721	negative regulation of cell development	19_GO:0032502 developmental process	-12	11	12	30284	285	172	17	9.9	2.3	655|1499|2064|2147|2932|3479|3553|3558|3569|5295|5728|7040|7099|7124|7157|7422|407006	BMP7|CTNNB1|ERBB2|F2|GSK3B|IGF1|IL1B|IL2|IL6|PIK3R1|PTEN|TGFB1|TLR4|TNF|TP53|VEGFA|MIR221	-10	MyList
GO Biological Processes	19	GO:0007423	sensory organ development	19_GO:0032502 developmental process	-12	6.6	11	30284	609	172	23	13	2.6	581|596|655|1499|1906|1956|2247|2255|2260|2263|2321|2353|3091|3815|5594|5781|6647|6774|7040|7046|7048|7422|7431	BAX|BCL2|BMP7|CTNNB1|EDN1|EGFR|FGF2|FGF10|FGFR1|FGFR2|FLT1|FOS|HIF1A|KIT|MAPK1|PTPN11|SOD1|STAT3|TGFB1|TGFBR1|TGFBR2|VEGFA|VIM	-10	MyList
GO Biological Processes	19	GO:0044344	cellular response to fibroblast growth factor stimulus	19_GO:0050896 response to stimulus	-12	17	14	30284	134	172	13	7.6	2	1499|1956|2064|2247|2255|2260|2263|2321|3480|3815|4233|5781|6352	CTNNB1|EGFR|ERBB2|FGF2|FGF10|FGFR1|FGFR2|FLT1|IGF1R|KIT|MET|PTPN11|CCL5	-10	MyList
GO Biological Processes	19	GO:0001816	cytokine production	19_GO:0032501 multicellular organismal process	-12	56	21	30284	25	172	8	4.7	1.6	834|3091|3553|3569|3606|3685|7124|54210	CASP1|HIF1A|IL1B|IL6|IL18|ITGAV|TNF|TREM1	-10	MyList
GO Biological Processes	19	GO:0030336	negative regulation of cell migration	19_GO:0040011 locomotion	-12	8.6	11	30284	388	172	19	11	2.4	207|596|673|1588|1803|2247|2309|2932|4282|4780|5468|5728|6387|6774|7040|7046|7076|7124|407006	AKT1|BCL2|BRAF|CYP19A1|DPP4|FGF2|FOXO3|GSK3B|MIF|NFE2L2|PPARG|PTEN|CXCL12|STAT3|TGFB1|TGFBR1|TIMP1|TNF|MIR221	-10	MyList
GO Biological Processes	19	GO:0071559	response to transforming growth factor beta	19_GO:0050896 response to stimulus	-12	14	13	30284	170	172	14	8.1	2.1	142|857|1513|1906|2263|2353|2908|3480|3725|6774|7040|7046|7048|7157	PARP1|CAV1|CTSK|EDN1|FGFR2|FOS|NR3C1|IGF1R|JUN|STAT3|TGFB1|TGFBR1|TGFBR2|TP53	-10	MyList
GO Biological Processes	19	GO:0048872	homeostasis of number of cells	19_GO:0042592 homeostatic process	-12	10	12	30284	294	172	17	9.9	2.3	207|355|581|596|836|1000|2821|3091|3569|3815|4846|5320|5781|6647|7040|7067|7422	AKT1|FAS|BAX|BCL2|CASP3|CDH2|GPI|HIF1A|IL6|KIT|NOS3|PLA2G2A|PTPN11|SOD1|TGFB1|THRA|VEGFA	-10	MyList
GO Biological Processes	19	GO:0019216	regulation of lipid metabolic process	19_GO:0050789 regulation of biological process	-12	9.2	12	30284	343	172	18	10	2.3	207|857|1385|2475|2908|3458|3480|3553|3815|4790|5294|5468|5594|5743|6721|7067|7124|10062	AKT1|CAV1|CREB1|MTOR|NR3C1|IFNG|IGF1R|IL1B|KIT|NFKB1|PIK3CG|PPARG|MAPK1|PTGS2|SREBF2|THRA|TNF|NR1H3	-10	MyList
GO Biological Processes	19	GO:0034764	positive regulation of transmembrane transport	19_GO:0051179 localization	-12	13	13	30284	211	172	15	8.7	2.2	207|581|673|760|857|1432|1520|1906|2147|3458|3479|3627|4780|5295|5781	AKT1|BAX|BRAF|CA2|CAV1|MAPK14|CTSS|EDN1|F2|IFNG|IGF1|CXCL10|NFE2L2|PIK3R1|PTPN11	-10	MyList
GO Biological Processes	19	GO:1901655	cellular response to ketone	19_GO:0050896 response to stimulus	-12	19	15	30284	109	172	12	7	1.9	196|207|367|1385|1646|1956|2309|2353|2908|3480|6667|7040	AHR|AKT1|AR|CREB1|AKR1C2|EGFR|FOXO3|FOS|NR3C1|IGF1R|SP1|TGFB1	-10	MyList
GO Biological Processes	19	GO:0043405	regulation of MAP kinase activity	19_GO:0050789 regulation of biological process	-12	19	15	30284	109	172	12	7	1.9	1906|1991|2064|2247|2260|2321|2950|3553|5294|7099|7124|7189	EDN1|ELANE|ERBB2|FGF2|FGFR1|FLT1|GSTP1|IL1B|PIK3CG|TLR4|TNF|TRAF6	-10	MyList
GO Biological Processes	19	GO:1904994	regulation of leukocyte adhesion to vascular endothelial cell	19_GO:0050789 regulation of biological process	-12	39	18	30284	41	172	9	5.2	1.7	240|1991|3569|5970|6387|6403|7124|7189|407006	ALOX5|ELANE|IL6|RELA|CXCL12|SELP|TNF|TRAF6|MIR221	-10	MyList
GO Biological Processes	19	GO:0030856	regulation of epithelial cell differentiation	19_GO:0032502 developmental process	-12	14	13	30284	174	172	14	8.1	2.1	595|655|857|1499|2247|2255|3458|3551|3553|4318|6772|7124|7422|7498	CCND1|BMP7|CAV1|CTNNB1|FGF2|FGF10|IFNG|IKBKB|IL1B|MMP9|STAT1|TNF|VEGFA|XDH	-10	MyList
GO Biological Processes	19	GO:0048013	ephrin receptor signaling pathway	19_GO:0050896 response to stimulus	-12	23	15	30284	83	172	11	6.4	1.9	1956|2064|2260|2263|2321|3480|3815|4233|4313|4318|5781	EGFR|ERBB2|FGFR1|FGFR2|FLT1|IGF1R|KIT|MET|MMP2|MMP9|PTPN11	-10	MyList
GO Biological Processes	19	GO:0002702	positive regulation of production of molecular mediator of immune response	19_GO:0002376 immune system process	-12	16	14	30284	141	172	13	7.6	2	2821|3553|3558|3569|3586|3606|3815|4282|6850|7040|7099|7189|114548	GPI|IL1B|IL2|IL6|IL10|IL18|KIT|MIF|SYK|TGFB1|TLR4|TRAF6|NLRP3	-10	MyList
GO Biological Processes	19	GO:0043123	positive regulation of canonical NF-kappaB signal transduction	19_GO:0048518 positive regulation of biological process	-12	12	13	30284	214	172	15	8.7	2.2	142|834|841|857|920|1906|3551|3553|5970|6774|7040|7099|7124|7189|7422	PARP1|CASP1|CASP8|CAV1|CD4|EDN1|IKBKB|IL1B|RELA|STAT3|TGFB1|TLR4|TNF|TRAF6|VEGFA	-10	MyList
GO Biological Processes	19	GO:0071478	cellular response to radiation	19_GO:0050896 response to stimulus	-12	14	13	30284	176	172	14	8.1	2.1	142|581|1026|1432|4312|4313|4314|4318|5295|7040|7076|7124|7157|27113	PARP1|BAX|CDKN1A|MAPK14|MMP1|MMP2|MMP3|MMP9|PIK3R1|TGFB1|TIMP1|TNF|TP53|BBC3	-10	MyList
GO Biological Processes	19	GO:0072593	reactive oxygen species metabolic process	19_GO:0009987 cellular process	-12	19	14	30284	111	172	12	7	1.9	596|847|875|1906|1956|4353|4780|4843|4846|6647|6648|7157	BCL2|CAT|CBS|EDN1|EGFR|MPO|NFE2L2|NOS2|NOS3|SOD1|SOD2|TP53	-10	MyList
GO Biological Processes	19	GO:0071346	cellular response to type II interferon	19_GO:0044419 biological process involved in interspecies interaction between organisms	-12	23	15	30284	84	172	11	6.4	1.9	834|1906|3458|4843|5894|6352|6772|7099|7124|7157|7431	CASP1|EDN1|IFNG|NOS2|RAF1|CCL5|STAT1|TLR4|TNF|TP53|VIM	-10	MyList
GO Biological Processes	19	GO:0071774	response to fibroblast growth factor	19_GO:0050896 response to stimulus	-12	16	14	30284	142	172	13	7.6	2	1499|1956|2064|2247|2255|2260|2263|2321|3480|3815|4233|5781|6352	CTNNB1|EGFR|ERBB2|FGF2|FGF10|FGFR1|FGFR2|FLT1|IGF1R|KIT|MET|PTPN11|CCL5	-10	MyList
GO Biological Processes	19	GO:0150077	regulation of neuroinflammatory response	19_GO:0050896 response to stimulus	-12	38	18	30284	42	172	9	5.2	1.7	3479|3553|3569|3606|4314|4317|4318|5743|7124	IGF1|IL1B|IL6|IL18|MMP3|MMP8|MMP9|PTGS2|TNF	-10	MyList
GO Biological Processes	19	GO:0051222	positive regulation of protein transport	19_GO:0051179 localization	-12	11	12	30284	257	172	16	9.3	2.2	1432|1956|2147|2932|3091|3458|3479|3553|5295|5468|5578|5743|7040|7099|7124|26229	MAPK14|EGFR|F2|GSK3B|HIF1A|IFNG|IGF1|IL1B|PIK3R1|PPARG|PRKCA|PTGS2|TGFB1|TLR4|TNF|B3GAT3	-10	MyList
GO Biological Processes	19	GO:2000146	negative regulation of cell motility	19_GO:0040011 locomotion	-12	8.3	11	30284	403	172	19	11	2.4	207|596|673|1588|1803|2247|2309|2932|4282|4780|5468|5728|6387|6774|7040|7046|7076|7124|407006	AKT1|BCL2|BRAF|CYP19A1|DPP4|FGF2|FOXO3|GSK3B|MIF|NFE2L2|PPARG|PTEN|CXCL12|STAT3|TGFB1|TGFBR1|TIMP1|TNF|MIR221	-10	MyList
GO Biological Processes	19	GO:2001243	negative regulation of intrinsic apoptotic signaling pathway	19_GO:0048519 negative regulation of biological process	-12	19	14	30284	112	172	12	7	1.9	207|596|1499|2247|3091|3586|4282|4318|4780|5743|6387|6648	AKT1|BCL2|CTNNB1|FGF2|HIF1A|IL10|MIF|MMP9|NFE2L2|PTGS2|CXCL12|SOD2	-10	MyList
GO Biological Processes	19	GO:0070228	regulation of lymphocyte apoptotic process	19_GO:0050789 regulation of biological process	-12	28	16	30284	62	172	10	5.8	1.8	581|596|3091|3558|3586|3958|4282|6352|7157|27113	BAX|BCL2|HIF1A|IL2|IL10|LGALS3|MIF|CCL5|TP53|BBC3	-10	MyList
GO Biological Processes	19	GO:0051341	regulation of oxidoreductase activity	19_GO:0065007 biological regulation	-12	28	16	30284	63	172	10	5.8	1.8	207|1906|2099|3091|3458|3553|4790|4883|5447|7124	AKT1|EDN1|ESR1|HIF1A|IFNG|IL1B|NFKB1|NPR3|POR|TNF	-10	MyList
GO Biological Processes	19	GO:0001837	epithelial to mesenchymal transition	19_GO:0032502 developmental process	-12	22	15	30284	87	172	11	6.4	1.9	655|1499|1906|2260|2263|2932|3091|3479|7040|7046|7048	BMP7|CTNNB1|EDN1|FGFR1|FGFR2|GSK3B|HIF1A|IGF1|TGFB1|TGFBR1|TGFBR2	-10	MyList
GO Biological Processes	19	GO:0042593	glucose homeostasis	19_GO:0042592 homeostatic process	-12	12	12	30284	221	172	15	8.7	2.2	207|240|2308|2309|2821|3091|3480|3569|5290|5295|5468|5781|5894|6774|7040	AKT1|ALOX5|FOXO1|FOXO3|GPI|HIF1A|IGF1R|IL6|PIK3CA|PIK3R1|PPARG|PTPN11|RAF1|STAT3|TGFB1	-10	MyList
GO Biological Processes	19	GO:0045598	regulation of fat cell differentiation	19_GO:0032502 developmental process	-12	16	13	30284	147	172	13	7.6	2	207|240|655|1385|1432|2308|3569|5468|5743|6648|7040|7124|7422	AKT1|ALOX5|BMP7|CREB1|MAPK14|FOXO1|IL6|PPARG|PTGS2|SOD2|TGFB1|TNF|VEGFA	-9.9	MyList
GO Biological Processes	19	GO:0033500	carbohydrate homeostasis	19_GO:0042592 homeostatic process	-12	12	12	30284	222	172	15	8.7	2.2	207|240|2308|2309|2821|3091|3480|3569|5290|5295|5468|5781|5894|6774|7040	AKT1|ALOX5|FOXO1|FOXO3|GPI|HIF1A|IGF1R|IL6|PIK3CA|PIK3R1|PPARG|PTPN11|RAF1|STAT3|TGFB1	-9.9	MyList
GO Biological Processes	19	GO:0045429	positive regulation of nitric oxide biosynthetic process	19_GO:0048518 positive regulation of biological process	-12	36	18	30284	44	172	9	5.2	1.7	207|1906|2099|3458|3553|5743|6648|7099|7124	AKT1|EDN1|ESR1|IFNG|IL1B|PTGS2|SOD2|TLR4|TNF	-9.9	MyList
GO Biological Processes	19	GO:0002697	regulation of immune effector process	19_GO:0002376 immune system process	-11	8.1	11	30284	414	172	19	11	2.4	196|2821|3458|3553|3558|3569|3586|3606|3726|3815|3958|4282|4843|6850|7040|7099|7124|7189|114548	AHR|GPI|IFNG|IL1B|IL2|IL6|IL10|IL18|JUNB|KIT|LGALS3|MIF|NOS2|SYK|TGFB1|TLR4|TNF|TRAF6|NLRP3	-9.9	MyList
GO Biological Processes	19	GO:0098586	cellular response to virus	19_GO:0044419 biological process involved in interspecies interaction between organisms	-11	22	15	30284	89	172	11	6.4	1.9	581|1432|3091|3458|3569|3627|4321|4790|6352|7040|114548	BAX|MAPK14|HIF1A|IFNG|IL6|CXCL10|MMP12|NFKB1|CCL5|TGFB1|NLRP3	-9.8	MyList
GO Biological Processes	19	GO:1904407	positive regulation of nitric oxide metabolic process	19_GO:0048518 positive regulation of biological process	-11	35	17	30284	45	172	9	5.2	1.7	207|1906|2099|3458|3553|5743|6648|7099|7124	AKT1|EDN1|ESR1|IFNG|IL1B|PTGS2|SOD2|TLR4|TNF	-9.8	MyList
GO Biological Processes	19	GO:0009895	negative regulation of catabolic process	19_GO:0048519 negative regulation of biological process	-11	8.7	11	30284	365	172	18	10	2.3	207|596|1432|1956|2475|3156|3553|3586|4233|4843|5290|5294|5970|6774|7076|7077|7124|7157	AKT1|BCL2|MAPK14|EGFR|MTOR|HMGCR|IL1B|IL10|MET|NOS2|PIK3CA|PIK3CG|RELA|STAT3|TIMP1|TIMP2|TNF|TP53	-9.8	MyList
GO Biological Processes	19	GO:0002699	positive regulation of immune effector process	19_GO:0002376 immune system process	-11	10	12	30284	270	172	16	9.3	2.2	2821|3458|3553|3558|3569|3586|3606|3815|4282|4843|6850|7040|7099|7124|7189|114548	GPI|IFNG|IL1B|IL2|IL6|IL10|IL18|KIT|MIF|NOS2|SYK|TGFB1|TLR4|TNF|TRAF6|NLRP3	-9.8	MyList
GO Biological Processes	19	GO:1904646	cellular response to amyloid-beta	19_GO:0050896 response to stimulus	-11	34	17	30284	46	172	9	5.2	1.7	142|2309|2932|3479|3480|6850|7099|7124|7412	PARP1|FOXO3|GSK3B|IGF1|IGF1R|SYK|TLR4|TNF|VCAM1	-9.7	MyList
GO Biological Processes	19	GO:0034644	cellular response to UV	19_GO:0050896 response to stimulus	-11	21	15	30284	91	172	11	6.4	1.9	142|581|1026|1432|4312|4313|4314|4318|5295|7076|7157	PARP1|BAX|CDKN1A|MAPK14|MMP1|MMP2|MMP3|MMP9|PIK3R1|TIMP1|TP53	-9.7	MyList
GO Biological Processes	19	GO:0032680	regulation of tumor necrosis factor production	19_GO:0032501 multicellular organismal process	-11	13	12	30284	191	172	14	8.1	2.1	2950|3458|3479|3569|3586|4282|4317|5295|5781|6774|6850|6868|7040|7099	GSTP1|IFNG|IGF1|IL6|IL10|MIF|MMP8|PIK3R1|PTPN11|STAT3|SYK|ADAM17|TGFB1|TLR4	-9.7	MyList
GO Biological Processes	19	GO:0008406	gonad development	19_GO:0022414 reproductive process	-11	11	12	30284	232	172	15	8.7	2.2	367|581|596|836|1588|2099|2309|3815|4313|4323|4846|5241|6647|7046|7422	AR|BAX|BCL2|CASP3|CYP19A1|ESR1|FOXO3|KIT|MMP2|MMP14|NOS3|PGR|SOD1|TGFBR1|VEGFA	-9.7	MyList
GO Biological Processes	19	GO:0002274	myeloid leukocyte activation	19_GO:0002376 immune system process	-11	15	13	30284	155	172	13	7.6	2	1511|3458|3606|3815|4137|5294|6352|6850|7040|7048|7099|7124|7189	CTSG|IFNG|IL18|KIT|MAPT|PIK3CG|CCL5|SYK|TGFB1|TGFBR2|TLR4|TNF|TRAF6	-9.7	MyList
GO Biological Processes	19	GO:0046903	secretion	19_GO:0051179 localization	-11	6.7	10	30284	550	172	21	12	2.5	595|673|760|857|1385|1906|2255|3091|3569|3815|4316|4843|5294|5320|5743|5894|6352|6850|6868|7422|7498	CCND1|BRAF|CA2|CAV1|CREB1|EDN1|FGF10|HIF1A|IL6|KIT|MMP7|NOS2|PIK3CG|PLA2G2A|PTGS2|RAF1|CCL5|SYK|ADAM17|VEGFA|XDH	-9.6	MyList
GO Biological Processes	19	GO:0045137	development of primary sexual characteristics	19_GO:0022414 reproductive process	-11	11	12	30284	237	172	15	8.7	2.2	367|581|596|836|1588|2099|2309|3815|4313|4323|4846|5241|6647|7046|7422	AR|BAX|BCL2|CASP3|CYP19A1|ESR1|FOXO3|KIT|MMP2|MMP14|NOS3|PGR|SOD1|TGFBR1|VEGFA	-9.5	MyList
GO Biological Processes	19	GO:1903555	regulation of tumor necrosis factor superfamily cytokine production	19_GO:0032501 multicellular organismal process	-11	13	12	30284	196	172	14	8.1	2.1	2950|3458|3479|3569|3586|4282|4317|5295|5781|6774|6850|6868|7040|7099	GSTP1|IFNG|IGF1|IL6|IL10|MIF|MMP8|PIK3R1|PTPN11|STAT3|SYK|ADAM17|TGFB1|TLR4	-9.5	MyList
GO Biological Processes	19	GO:0002700	regulation of production of molecular mediator of immune response	19_GO:0002376 immune system process	-11	13	12	30284	197	172	14	8.1	2.1	2821|3553|3558|3569|3586|3606|3815|4282|6850|7040|7099|7124|7189|114548	GPI|IL1B|IL2|IL6|IL10|IL18|KIT|MIF|SYK|TGFB1|TLR4|TNF|TRAF6|NLRP3	-9.5	MyList
GO Biological Processes	19	GO:0010717	regulation of epithelial to mesenchymal transition	19_GO:0032502 developmental process	-11	17	13	30284	126	172	12	7	1.9	655|1499|2475|2932|3553|3569|5728|7040|7046|7048|7422|407006	BMP7|CTNNB1|MTOR|GSK3B|IL1B|IL6|PTEN|TGFB1|TGFBR1|TGFBR2|VEGFA|MIR221	-9.5	MyList
GO Biological Processes	19	GO:0002718	regulation of cytokine production involved in immune response	19_GO:0002376 immune system process	-11	17	13	30284	126	172	12	7	1.9	3553|3569|3586|3606|3815|4282|6850|7040|7099|7124|7189|114548	IL1B|IL6|IL10|IL18|KIT|MIF|SYK|TGFB1|TLR4|TNF|TRAF6|NLRP3	-9.5	MyList
GO Biological Processes	19	GO:0097192	extrinsic apoptotic signaling pathway in absence of ligand	19_GO:0050896 response to stimulus	-11	44	18	30284	32	172	8	4.7	1.6	581|596|2255|2309|2932|3553|3558|3685	BAX|BCL2|FGF10|FOXO3|GSK3B|IL1B|IL2|ITGAV	-9.5	MyList
GO Biological Processes	19	GO:0002688	regulation of leukocyte chemotaxis	19_GO:0040011 locomotion	-11	17	13	30284	127	172	12	7	1.9	1588|1803|1906|3569|3627|4282|5228|5594|6352|6387|6868|7422	CYP19A1|DPP4|EDN1|IL6|CXCL10|MIF|PGF|MAPK1|CCL5|CXCL12|ADAM17|VEGFA	-9.5	MyList
GO Biological Processes	19	GO:0046889	positive regulation of lipid biosynthetic process	19_GO:0048518 positive regulation of biological process	-11	20	14	30284	97	172	11	6.4	1.9	207|1385|2475|3458|3480|3553|5594|5743|6721|7124|10062	AKT1|CREB1|MTOR|IFNG|IGF1R|IL1B|MAPK1|PTGS2|SREBF2|TNF|NR1H3	-9.5	MyList
GO Biological Processes	19	GO:0002768	immune response-regulating cell surface receptor signaling pathway	19_GO:0002376 immune system process	-11	9.9	11	30284	286	172	16	9.3	2.2	581|596|673|3458|3551|3815|4790|4792|4843|5290|5594|5599|5970|6850|7099|7189	BAX|BCL2|BRAF|IFNG|IKBKB|KIT|NFKB1|NFKBIA|NOS2|PIK3CA|MAPK1|MAPK8|RELA|SYK|TLR4|TRAF6	-9.4	MyList
GO Biological Processes	19	GO:0048589	developmental growth	19_GO:0040007 growth	-11	7.6	11	30284	441	172	19	11	2.4	367|596|627|1026|1499|1588|1906|2099|2255|2260|2263|2309|2475|3479|4322|5781|7040|7048|7157	AR|BCL2|BDNF|CDKN1A|CTNNB1|CYP19A1|EDN1|ESR1|FGF10|FGFR1|FGFR2|FOXO3|MTOR|IGF1|MMP13|PTPN11|TGFB1|TGFBR2|TP53	-9.4	MyList
GO Biological Processes	19	GO:0040007	growth	19_GO:0040007 growth	-11	7.6	11	30284	441	172	19	11	2.4	367|596|627|1026|1499|1588|1906|2099|2255|2260|2263|2309|2475|3479|4322|5781|7040|7048|7157	AR|BCL2|BDNF|CDKN1A|CTNNB1|CYP19A1|EDN1|ESR1|FGF10|FGFR1|FGFR2|FOXO3|MTOR|IGF1|MMP13|PTPN11|TGFB1|TGFBR2|TP53	-9.4	MyList
GO Biological Processes	19	GO:0070371	ERK1 and ERK2 cascade	19_GO:0050896 response to stimulus	-11	32	16	30284	50	172	9	5.2	1.7	673|1906|1950|2247|2255|3685|5594|5604|7099	BRAF|EDN1|EGF|FGF2|FGF10|ITGAV|MAPK1|MAP2K1|TLR4	-9.4	MyList
GO Biological Processes	19	GO:0048538	thymus development	19_GO:0002376 immune system process	-11	32	16	30284	50	172	9	5.2	1.7	596|673|1499|2255|5594|5604|5894|6647|7046	BCL2|BRAF|CTNNB1|FGF10|MAPK1|MAP2K1|RAF1|SOD1|TGFBR1	-9.4	MyList
GO Biological Processes	19	GO:0090322	regulation of superoxide metabolic process	19_GO:0050789 regulation of biological process	-11	43	18	30284	33	172	8	4.7	1.6	655|1956|2950|4137|4780|6647|6850|7040	BMP7|EGFR|GSTP1|MAPT|NFE2L2|SOD1|SYK|TGFB1	-9.4	MyList
GO Biological Processes	19	GO:0009266	response to temperature stimulus	19_GO:0050896 response to stimulus	-11	14	13	30284	164	172	13	7.6	2	207|1026|2308|2475|3479|3627|4137|4792|4846|5743|6387|6647|7067	AKT1|CDKN1A|FOXO1|MTOR|IGF1|CXCL10|MAPT|NFKBIA|NOS3|PTGS2|CXCL12|SOD1|THRA	-9.4	MyList
GO Biological Processes	19	GO:0055093	response to hyperoxia	19_GO:0050896 response to stimulus	-11	62	20	30284	20	172	7	4.1	1.5	355|847|857|1026|2308|4313|6648	FAS|CAT|CAV1|CDKN1A|FOXO1|MMP2|SOD2	-9.3	MyList
GO Biological Processes	19	GO:0032652	regulation of interleukin-1 production	19_GO:0032501 multicellular organismal process	-11	16	13	30284	131	172	12	7	1.9	834|841|2950|3458|3479|3569|3586|5970|6774|7099|7124|114548	CASP1|CASP8|GSTP1|IFNG|IGF1|IL6|IL10|RELA|STAT3|TLR4|TNF|NLRP3	-9.3	MyList
GO Biological Processes	19	GO:0045862	positive regulation of proteolysis	19_GO:0048518 positive regulation of biological process	-11	9.6	11	30284	294	172	16	9.3	2.2	207|355|834|841|857|1950|2932|3458|3553|4323|4780|5728|6774|7124|7498|27113	AKT1|FAS|CASP1|CASP8|CAV1|EGF|GSK3B|IFNG|IL1B|MMP14|NFE2L2|PTEN|STAT3|TNF|XDH|BBC3	-9.3	MyList
GO Biological Processes	19	GO:0071229	cellular response to acid chemical	19_GO:0050896 response to stimulus	-11	19	14	30284	101	172	11	6.4	1.9	1786|1788|1956|2475|4313|4314|4780|5290|5743|7124|7422	DNMT1|DNMT3A|EGFR|MTOR|MMP2|MMP3|NFE2L2|PIK3CA|PTGS2|TNF|VEGFA	-9.3	MyList
GO Biological Processes	19	GO:0038034	signal transduction in absence of ligand	19_GO:0050896 response to stimulus	-11	41	18	30284	34	172	8	4.7	1.6	581|596|2255|2309|2932|3553|3558|3685	BAX|BCL2|FGF10|FOXO3|GSK3B|IL1B|IL2|ITGAV	-9.3	MyList
GO Biological Processes	19	GO:0051147	regulation of muscle cell differentiation	19_GO:0032502 developmental process	-11	14	12	30284	167	172	13	7.6	2	596|627|1432|1786|1906|2263|2475|3479|3815|4323|6648|7040|407006	BCL2|BDNF|MAPK14|DNMT1|EDN1|FGFR2|MTOR|IGF1|KIT|MMP14|SOD2|TGFB1|MIR221	-9.3	MyList
GO Biological Processes	19	GO:0051054	positive regulation of DNA metabolic process	19_GO:0048518 positive regulation of biological process	-11	9.5	11	30284	296	172	16	9.3	2.2	142|207|581|1026|1499|1956|2247|2255|2260|3480|3558|3569|5594|7040|7124|7422	PARP1|AKT1|BAX|CDKN1A|CTNNB1|EGFR|FGF2|FGF10|FGFR1|IGF1R|IL2|IL6|MAPK1|TGFB1|TNF|VEGFA	-9.2	MyList
GO Biological Processes	19	GO:0045834	positive regulation of lipid metabolic process	19_GO:0048518 positive regulation of biological process	-11	16	13	30284	133	172	12	7	1.9	207|1385|2475|3458|3480|3553|5468|5594|5743|6721|7124|10062	AKT1|CREB1|MTOR|IFNG|IGF1R|IL1B|PPARG|MAPK1|PTGS2|SREBF2|TNF|NR1H3	-9.2	MyList
GO Biological Processes	19	GO:0032755	positive regulation of interleukin-6 production	19_GO:0032501 multicellular organismal process	-11	19	14	30284	102	172	11	6.4	1.9	3458|3553|3569|4843|5970|6774|6850|7040|7099|7124|7189	IFNG|IL1B|IL6|NOS2|RELA|STAT3|SYK|TGFB1|TLR4|TNF|TRAF6	-9.2	MyList
GO Biological Processes	19	GO:0050864	regulation of B cell activation	19_GO:0002376 immune system process	-11	16	13	30284	134	172	12	7	1.9	196|596|836|1026|3558|3569|3586|4282|4323|6850|7040|7099	AHR|BCL2|CASP3|CDKN1A|IL2|IL6|IL10|MIF|MMP14|SYK|TGFB1|TLR4	-9.2	MyList
GO Biological Processes	19	GO:0031547	brain-derived neurotrophic factor receptor signaling pathway	19_GO:0050896 response to stimulus	-11	30	16	30284	53	172	9	5.2	1.7	627|1956|2064|2260|2263|2321|3480|3815|4233	BDNF|EGFR|ERBB2|FGFR1|FGFR2|FLT1|IGF1R|KIT|MET	-9.2	MyList
GO Biological Processes	19	GO:0050918	positive chemotaxis	19_GO:0040011 locomotion	-11	30	16	30284	53	172	9	5.2	1.7	2247|2255|3627|3958|4233|4282|5228|6352|7422	FGF2|FGF10|CXCL10|LGALS3|MET|MIF|PGF|CCL5|VEGFA	-9.2	MyList
GO Biological Processes	19	GO:0090087	regulation of peptide transport	19_GO:0051179 localization	-11	12	12	30284	209	172	14	8.1	2.1	240|760|1956|2147|2308|3091|3458|3553|3569|4843|5578|5781|6352|7124	ALOX5|CA2|EGFR|F2|FOXO1|HIF1A|IFNG|IL1B|IL6|NOS2|PRKCA|PTPN11|CCL5|TNF	-9.2	MyList
GO Biological Processes	19	GO:0051924	regulation of calcium ion transport	19_GO:0051179 localization	-11	10	11	30284	253	172	15	8.7	2.2	581|596|857|920|1499|1950|2147|3627|3958|4846|5294|5743|6352|6387|7040	BAX|BCL2|CAV1|CD4|CTNNB1|EGF|F2|CXCL10|LGALS3|NOS3|PIK3CG|PTGS2|CCL5|CXCL12|TGFB1	-9.2	MyList
GO Biological Processes	19	GO:0051098	regulation of binding	19_GO:0065007 biological regulation	-11	12	12	30284	210	172	14	8.1	2.1	207|581|627|1026|1950|2932|3458|3479|3586|3725|4233|4318|5599|7189	AKT1|BAX|BDNF|CDKN1A|EGF|GSK3B|IFNG|IGF1|IL10|JUN|MET|MMP9|MAPK8|TRAF6	-9.2	MyList
GO Biological Processes	19	GO:0048639	positive regulation of developmental growth	19_GO:0040007 growth	-11	13	12	30284	171	172	13	7.6	2	207|596|627|1385|1432|1906|2247|2260|2263|3479|4137|6387|7422	AKT1|BCL2|BDNF|CREB1|MAPK14|EDN1|FGF2|FGFR1|FGFR2|IGF1|MAPT|CXCL12|VEGFA	-9.1	MyList
GO Biological Processes	19	GO:0043524	negative regulation of neuron apoptotic process	19_GO:0048519 negative regulation of biological process	-11	13	12	30284	171	172	13	7.6	2	581|595|596|627|673|1499|2247|2821|3091|3586|5290|6647|6648	BAX|CCND1|BCL2|BDNF|BRAF|CTNNB1|FGF2|GPI|HIF1A|IL10|PIK3CA|SOD1|SOD2	-9.1	MyList
GO Biological Processes	19	GO:0045089	positive regulation of innate immune response	19_GO:0044419 biological process involved in interspecies interaction between organisms	-11	9.4	11	30284	301	172	16	9.3	2.2	834|857|1520|3551|4321|4792|5599|5970|6352|6850|7099|7124|7189|8061|10062|114548	CASP1|CAV1|CTSS|IKBKB|MMP12|NFKBIA|MAPK8|RELA|CCL5|SYK|TLR4|TNF|TRAF6|FOSL1|NR1H3|NLRP3	-9.1	MyList
GO Biological Processes	19	GO:0071347	cellular response to interleukin-1	19_GO:0050896 response to stimulus	-11	23	15	30284	77	172	10	5.8	1.8	1906|3091|3551|3553|4313|4790|4792|5970|6352|7189	EDN1|HIF1A|IKBKB|IL1B|MMP2|NFKB1|NFKBIA|RELA|CCL5|TRAF6	-9.1	MyList
GO Biological Processes	19	GO:0070555	response to interleukin-1	19_GO:0050896 response to stimulus	-11	18	14	30284	105	172	11	6.4	1.9	1906|3091|3551|3553|4313|4790|4792|5578|5970|6352|7189	EDN1|HIF1A|IKBKB|IL1B|MMP2|NFKB1|NFKBIA|PRKCA|RELA|CCL5|TRAF6	-9.1	MyList
GO Biological Processes	19	GO:0031175	neuron projection development	19_GO:0032502 developmental process	-11	5.6	9.5	30284	717	172	23	13	2.6	596|627|655|836|1385|1499|1906|1956|2064|2260|2263|2932|3480|3569|4137|4313|5728|5781|6387|6647|6868|7422|7431	BCL2|BDNF|BMP7|CASP3|CREB1|CTNNB1|EDN1|EGFR|ERBB2|FGFR1|FGFR2|GSK3B|IGF1R|IL6|MAPT|MMP2|PTEN|PTPN11|CXCL12|SOD1|ADAM17|VEGFA|VIM	-9.1	MyList
GO Biological Processes	19	GO:0070661	leukocyte proliferation	19_GO:0009987 cellular process	-11	15	13	30284	137	172	12	7	1.9	581|596|2064|3558|3586|3726|3815|4883|5294|7040|7099|7157	BAX|BCL2|ERBB2|IL2|IL10|JUNB|KIT|NPR3|PIK3CG|TGFB1|TLR4|TP53	-9.1	MyList
GO Biological Processes	19	GO:0010827	regulation of D-glucose transmembrane transport	19_GO:0051179 localization	-11	23	14	30284	78	172	10	5.8	1.8	207|673|1432|1906|3479|3553|4780|5295|5781|7124	AKT1|BRAF|MAPK14|EDN1|IGF1|IL1B|NFE2L2|PIK3R1|PTPN11|TNF	-9.1	MyList
GO Biological Processes	19	GO:0051216	cartilage development	19_GO:0032502 developmental process	-11	13	12	30284	175	172	13	7.6	2	655|875|1432|1499|1906|2247|2260|3091|4322|7040|7048|7067|7076	BMP7|CBS|MAPK14|CTNNB1|EDN1|FGF2|FGFR1|HIF1A|MMP13|TGFB1|TGFBR2|THRA|TIMP1	-9	MyList
GO Biological Processes	19	GO:0010506	regulation of autophagy	19_GO:0050789 regulation of biological process	-11	8.3	11	30284	359	172	17	9.9	2.3	207|596|836|2308|2309|2475|2932|3091|3458|3586|4137|4233|5290|5599|6721|6774|7157	AKT1|BCL2|CASP3|FOXO1|FOXO3|MTOR|GSK3B|HIF1A|IFNG|IL10|MAPT|MET|PIK3CA|MAPK8|SREBF2|STAT3|TP53	-9	MyList
GO Biological Processes	19	GO:0055082	intracellular chemical homeostasis	19_GO:0042592 homeostatic process	-11	6.2	9.7	30284	593	172	21	12	2.5	581|596|760|857|1906|1991|2147|2308|2309|2950|3091|3480|5290|5295|5594|5894|6352|6387|6647|6648|7040	BAX|BCL2|CA2|CAV1|EDN1|ELANE|F2|FOXO1|FOXO3|GSTP1|HIF1A|IGF1R|PIK3CA|PIK3R1|MAPK1|RAF1|CCL5|CXCL12|SOD1|SOD2|TGFB1	-9	MyList
GO Biological Processes	19	GO:0001541	ovarian follicle development	19_GO:0022414 reproductive process	-11	28	15	30284	56	172	9	5.2	1.7	581|596|2099|2309|3815|4313|4323|6647|7422	BAX|BCL2|ESR1|FOXO3|KIT|MMP2|MMP14|SOD1|VEGFA	-9	MyList
GO Biological Processes	19	GO:0030857	negative regulation of epithelial cell differentiation	19_GO:0032502 developmental process	-11	28	15	30284	56	172	9	5.2	1.7	595|857|1499|2255|3458|4318|6772|7422|7498	CCND1|CAV1|CTNNB1|FGF10|IFNG|MMP9|STAT1|VEGFA|XDH	-9	MyList
GO Biological Processes	19	GO:0031346	positive regulation of cell projection organization	19_GO:0048518 positive regulation of biological process	-11	8.3	11	30284	360	172	17	9.9	2.3	627|655|673|2260|2475|2932|3480|3815|4137|4780|5290|5295|5604|6387|7046|7422|407006	BDNF|BMP7|BRAF|FGFR1|MTOR|GSK3B|IGF1R|KIT|MAPT|NFE2L2|PIK3CA|PIK3R1|MAP2K1|CXCL12|TGFBR1|VEGFA|MIR221	-9	MyList
GO Biological Processes	19	GO:0034341	response to type II interferon	19_GO:0044419 biological process involved in interspecies interaction between organisms	-11	18	13	30284	108	172	11	6.4	1.9	834|1906|3458|4843|5894|6352|6772|7099|7124|7157|7431	CASP1|EDN1|IFNG|NOS2|RAF1|CCL5|STAT1|TLR4|TNF|TP53|VIM	-9	MyList
GO Biological Processes	19	GO:1900015	regulation of cytokine production involved in inflammatory response	19_GO:0032501 multicellular organismal process	-11	22	14	30284	80	172	10	5.8	1.8	240|1432|2147|3091|3569|4843|6774|7099|7124|407006	ALOX5|MAPK14|F2|HIF1A|IL6|NOS2|STAT3|TLR4|TNF|MIR221	-9	MyList
GO Biological Processes	19	GO:0032760	positive regulation of tumor necrosis factor production	19_GO:0032501 multicellular organismal process	-10	18	13	30284	110	172	11	6.4	1.9	3458|3569|4282|4317|5295|5781|6774|6850|6868|7040|7099	IFNG|IL6|MIF|MMP8|PIK3R1|PTPN11|STAT3|SYK|ADAM17|TGFB1|TLR4	-8.9	MyList
GO Biological Processes	19	GO:0034391	regulation of smooth muscle cell apoptotic process	19_GO:0050789 regulation of biological process	-10	37	17	30284	38	172	8	4.7	1.6	1786|1906|2099|2308|3458|3479|5468|6648	DNMT1|EDN1|ESR1|FOXO1|IFNG|IGF1|PPARG|SOD2	-8.9	MyList
GO Biological Processes	19	GO:0044403	biological process involved in symbiotic interaction	19_GO:0044419 biological process involved in interspecies interaction between organisms	-10	9.9	11	30284	267	172	15	8.7	2.2	207|857|920|1508|1511|1803|1956|1991|2147|3685|3725|6352|6667|54210|407006	AKT1|CAV1|CD4|CTSB|CTSG|DPP4|EGFR|ELANE|F2|ITGAV|JUN|CCL5|SP1|TREM1|MIR221	-8.8	MyList
GO Biological Processes	19	GO:0032651	regulation of interleukin-1 beta production	19_GO:0032501 multicellular organismal process	-10	17	13	30284	111	172	11	6.4	1.9	834|841|2950|3458|3479|3569|5970|6774|7099|7124|114548	CASP1|CASP8|GSTP1|IFNG|IGF1|IL6|RELA|STAT3|TLR4|TNF|NLRP3	-8.8	MyList
GO Biological Processes	19	GO:0038063	collagen-activated tyrosine kinase receptor signaling pathway	19_GO:0050896 response to stimulus	-10	27	15	30284	58	172	9	5.2	1.7	1956|2064|2260|2263|2321|3480|3815|4233|6850	EGFR|ERBB2|FGFR1|FGFR2|FLT1|IGF1R|KIT|MET|SYK	-8.8	MyList
GO Biological Processes	19	GO:0014823	response to activity	19_GO:0050896 response to stimulus	-10	21	14	30284	83	172	10	5.8	1.8	847|1906|2353|3091|3569|3586|4313|5290|6648|7124	CAT|EDN1|FOS|HIF1A|IL6|IL10|MMP2|PIK3CA|SOD2|TNF	-8.8	MyList
GO Biological Processes	19	GO:2000027	regulation of animal organ morphogenesis	19_GO:0032502 developmental process	-10	21	14	30284	83	172	10	5.8	1.8	367|655|1499|1906|2247|2255|2260|7040|7124|7422	AR|BMP7|CTNNB1|EDN1|FGF2|FGF10|FGFR1|TGFB1|TNF|VEGFA	-8.8	MyList
GO Biological Processes	19	GO:0014013	regulation of gliogenesis	19_GO:0032502 developmental process	-10	17	13	30284	112	172	11	6.4	1.9	1499|1956|2147|2475|3553|3569|5970|7040|7124|7157|407006	CTNNB1|EGFR|F2|MTOR|IL1B|IL6|RELA|TGFB1|TNF|TP53|MIR221	-8.8	MyList
GO Biological Processes	19	GO:0045619	regulation of lymphocyte differentiation	19_GO:0002376 immune system process	-10	11	11	30284	225	172	14	8.1	2.1	673|2064|2309|3458|3558|3586|3606|3726|4323|6647|6850|7040|7048|114548	BRAF|ERBB2|FOXO3|IFNG|IL2|IL10|IL18|JUNB|MMP14|SOD1|SYK|TGFB1|TGFBR2|NLRP3	-8.8	MyList
GO Biological Processes	19	GO:0060135	maternal process involved in female pregnancy	19_GO:0022414 reproductive process	-10	27	15	30284	59	172	9	5.2	1.7	142|207|367|875|1508|2099|3726|5241|5743	PARP1|AKT1|AR|CBS|CTSB|ESR1|JUNB|PGR|PTGS2	-8.8	MyList
GO Biological Processes	19	GO:0036005	response to macrophage colony-stimulating factor	19_GO:0050896 response to stimulus	-10	27	15	30284	59	172	9	5.2	1.7	1956|2064|2260|2263|2321|3480|3815|4233|7124	EGFR|ERBB2|FGFR1|FGFR2|FLT1|IGF1R|KIT|MET|TNF	-8.8	MyList
GO Biological Processes	19	GO:1903557	positive regulation of tumor necrosis factor superfamily cytokine production	19_GO:0032501 multicellular organismal process	-10	17	13	30284	114	172	11	6.4	1.9	3458|3569|4282|4317|5295|5781|6774|6850|6868|7040|7099	IFNG|IL6|MIF|MMP8|PIK3R1|PTPN11|STAT3|SYK|ADAM17|TGFB1|TLR4	-8.7	MyList
GO Biological Processes	19	GO:0071482	cellular response to light stimulus	19_GO:0050896 response to stimulus	-10	17	13	30284	114	172	11	6.4	1.9	142|581|1026|1432|4312|4313|4314|4318|5295|7076|7157	PARP1|BAX|CDKN1A|MAPK14|MMP1|MMP2|MMP3|MMP9|PIK3R1|TIMP1|TP53	-8.7	MyList
GO Biological Processes	19	GO:0071675	regulation of mononuclear cell migration	19_GO:0040011 locomotion	-10	14	12	30284	148	172	12	7	1.9	207|1588|3627|3958|4282|4323|5594|6352|6387|6868|7040|7124	AKT1|CYP19A1|CXCL10|LGALS3|MIF|MMP14|MAPK1|CCL5|CXCL12|ADAM17|TGFB1|TNF	-8.7	MyList
GO Biological Processes	19	GO:0010718	positive regulation of epithelial to mesenchymal transition	19_GO:0032502 developmental process	-10	26	15	30284	60	172	9	5.2	1.7	655|1499|2475|3553|3569|7040|7046|7048|407006	BMP7|CTNNB1|MTOR|IL1B|IL6|TGFB1|TGFBR1|TGFBR2|MIR221	-8.7	MyList
GO Biological Processes	19	GO:0030316	osteoclast differentiation	19_GO:0032502 developmental process	-10	26	15	30284	60	172	9	5.2	1.7	1385|1432|1499|2353|3726|5295|7040|7124|7189	CREB1|MAPK14|CTNNB1|FOS|JUNB|PIK3R1|TGFB1|TNF|TRAF6	-8.7	MyList
GO Biological Processes	19	GO:0006351	DNA-templated transcription	19_GO:0009987 cellular process	-10	6.4	9.7	30284	551	172	20	12	2.4	142|367|1385|1432|1499|1786|1906|2099|2247|2309|2353|3558|4790|5295|5468|5970|6774|7067|7157|10062	PARP1|AR|CREB1|MAPK14|CTNNB1|DNMT1|EDN1|ESR1|FGF2|FOXO3|FOS|IL2|NFKB1|PIK3R1|PPARG|RELA|STAT3|THRA|TP53|NR1H3	-8.7	MyList
GO Biological Processes	19	GO:0006690	icosanoid metabolic process	19_GO:0009987 cellular process	-10	17	13	30284	115	172	11	6.4	1.9	240|834|1559|1645|1646|1906|2950|4282|5742|5743|6850	ALOX5|CASP1|CYP2C9|AKR1C1|AKR1C2|EDN1|GSTP1|MIF|PTGS1|PTGS2|SYK	-8.7	MyList
GO Biological Processes	19	GO:0071674	mononuclear cell migration	19_GO:0002376 immune system process	-10	17	13	30284	115	172	11	6.4	1.9	240|1511|2321|3569|3627|3958|4313|5175|5294|6352|6387	ALOX5|CTSG|FLT1|IL6|CXCL10|LGALS3|MMP2|PECAM1|PIK3CG|CCL5|CXCL12	-8.7	MyList
GO Biological Processes	19	GO:2001235	positive regulation of apoptotic signaling pathway	19_GO:0048518 positive regulation of biological process	-10	14	12	30284	149	172	12	7	1.9	355|581|857|4313|5468|6647|6667|7046|7099|7124|7157|27113	FAS|BAX|CAV1|MMP2|PPARG|SOD1|SP1|TGFBR1|TLR4|TNF|TP53|BBC3	-8.7	MyList
GO Biological Processes	19	GO:0001892	embryonic placenta development	19_GO:0032502 developmental process	-10	20	14	30284	86	172	10	5.8	1.8	207|655|841|1956|2263|3091|3586|3726|5594|5604	AKT1|BMP7|CASP8|EGFR|FGFR2|HIF1A|IL10|JUNB|MAPK1|MAP2K1	-8.7	MyList
GO Biological Processes	19	GO:0050871	positive regulation of B cell activation	19_GO:0002376 immune system process	-10	20	14	30284	86	172	10	5.8	1.8	596|1026|3558|3569|3586|4282|4323|6850|7040|7099	BCL2|CDKN1A|IL2|IL6|IL10|MIF|MMP14|SYK|TGFB1|TLR4	-8.7	MyList
GO Biological Processes	19	GO:0048705	skeletal system morphogenesis	19_GO:0032502 developmental process	-10	11	11	30284	231	172	14	8.1	2.1	655|875|1432|1499|2260|2263|4313|4322|4323|7040|7046|7048|7067|7422	BMP7|CBS|MAPK14|CTNNB1|FGFR1|FGFR2|MMP2|MMP13|MMP14|TGFB1|TGFBR1|TGFBR2|THRA|VEGFA	-8.6	MyList
GO Biological Processes	19	GO:0048863	stem cell differentiation	19_GO:0032502 developmental process	-10	12	12	30284	189	172	13	7.6	2	596|1000|1432|1499|1906|2099|2247|2260|2263|3091|3815|5594|7157	BCL2|CDH2|MAPK14|CTNNB1|EDN1|ESR1|FGF2|FGFR1|FGFR2|HIF1A|KIT|MAPK1|TP53	-8.6	MyList
GO Biological Processes	19	GO:0120161	regulation of cold-induced thermogenesis	19_GO:0042592 homeostatic process	-10	14	12	30284	151	172	12	7	1.9	857|2167|3480|3606|3934|4883|6850|6868|7067|7099|7422|10062	CAV1|FABP4|IGF1R|IL18|LCN2|NPR3|SYK|ADAM17|THRA|TLR4|VEGFA|NR1H3	-8.6	MyList
GO Biological Processes	19	GO:0009743	response to carbohydrate	19_GO:0050896 response to stimulus	-10	12	12	30284	190	172	13	7.6	2	836|847|2309|3091|3480|3553|5290|5743|5894|6648|7040|7124|407006	CASP3|CAT|FOXO3|HIF1A|IGF1R|IL1B|PIK3CA|PTGS2|RAF1|SOD2|TGFB1|TNF|MIR221	-8.6	MyList
GO Biological Processes	19	GO:0050890	cognition	19_GO:0032501 multicellular organismal process	-10	8.6	10	30284	329	172	16	9.3	2.2	673|836|1385|1956|2353|2821|3091|3156|3815|4137|5594|5728|5743|7067|7124|8061	BRAF|CASP3|CREB1|EGFR|FOS|GPI|HIF1A|HMGCR|KIT|MAPT|MAPK1|PTEN|PTGS2|THRA|TNF|FOSL1	-8.6	MyList
GO Biological Processes	19	GO:0032731	positive regulation of interleukin-1 beta production	19_GO:0032501 multicellular organismal process	-10	26	15	30284	62	172	9	5.2	1.7	834|841|3458|3569|5970|6774|7099|7124|114548	CASP1|CASP8|IFNG|IL6|RELA|STAT3|TLR4|TNF|NLRP3	-8.6	MyList
GO Biological Processes	19	GO:0038065	collagen-activated signaling pathway	19_GO:0050896 response to stimulus	-10	26	15	30284	62	172	9	5.2	1.7	1956|2064|2260|2263|2321|3480|3815|4233|6850	EGFR|ERBB2|FGFR1|FGFR2|FLT1|IGF1R|KIT|MET|SYK	-8.6	MyList
GO Biological Processes	19	GO:0061448	connective tissue development	19_GO:0032502 developmental process	-10	11	11	30284	234	172	14	8.1	2.1	655|875|1432|1499|1906|2247|2260|3091|4322|5290|7040|7048|7067|7076	BMP7|CBS|MAPK14|CTNNB1|EDN1|FGF2|FGFR1|HIF1A|MMP13|PIK3CA|TGFB1|TGFBR2|THRA|TIMP1	-8.6	MyList
GO Biological Processes	19	GO:0090594	inflammatory response to wounding	19_GO:0050896 response to stimulus	-10	75	21	30284	14	172	6	3.5	1.4	3091|3569|7040|7076|7099|7124	HIF1A|IL6|TGFB1|TIMP1|TLR4|TNF	-8.5	MyList
GO Biological Processes	19	GO:0007611	learning or memory	19_GO:0032501 multicellular organismal process	-10	9.4	11	30284	282	172	15	8.7	2.2	673|836|1385|1956|2353|2821|3091|3156|3815|4137|5594|5728|5743|7067|8061	BRAF|CASP3|CREB1|EGFR|FOS|GPI|HIF1A|HMGCR|KIT|MAPT|MAPK1|PTEN|PTGS2|THRA|FOSL1	-8.5	MyList
GO Biological Processes	19	GO:0006109	regulation of carbohydrate metabolic process	19_GO:0050789 regulation of biological process	-10	12	11	30284	193	172	13	7.6	2	207|1950|2308|2475|2908|2932|3091|3458|3479|4790|6774|7040|7157	AKT1|EGF|FOXO1|MTOR|NR3C1|GSK3B|HIF1A|IFNG|IGF1|NFKB1|STAT3|TGFB1|TP53	-8.5	MyList
GO Biological Processes	19	GO:0051052	regulation of DNA metabolic process	19_GO:0050789 regulation of biological process	-10	6.6	9.6	30284	505	172	19	11	2.4	142|207|581|1026|1499|1956|2247|2255|2260|3480|3558|3569|3586|5594|7040|7124|7157|7422|407006	PARP1|AKT1|BAX|CDKN1A|CTNNB1|EGFR|FGF2|FGF10|FGFR1|IGF1R|IL2|IL6|IL10|MAPK1|TGFB1|TNF|TP53|VEGFA|MIR221	-8.5	MyList
GO Biological Processes	19	GO:1904996	positive regulation of leukocyte adhesion to vascular endothelial cell	19_GO:0048518 positive regulation of biological process	-10	47	18	30284	26	172	7	4.1	1.5	240|1991|3569|5970|6403|7124|7189	ALOX5|ELANE|IL6|RELA|SELP|TNF|TRAF6	-8.5	MyList
GO Biological Processes	19	GO:0097530	granulocyte migration	19_GO:0002376 immune system process	-10	20	13	30284	90	172	10	5.8	1.8	3553|3627|3958|5175|5294|6352|6367|6850|7422|54210	IL1B|CXCL10|LGALS3|PECAM1|PIK3CG|CCL5|CCL22|SYK|VEGFA|TREM1	-8.5	MyList
GO Biological Processes	19	GO:0002763	positive regulation of myeloid leukocyte differentiation	19_GO:0002376 immune system process	-10	25	14	30284	64	172	9	5.2	1.7	841|920|1385|2353|3458|5578|7040|7124|7189	CASP8|CD4|CREB1|FOS|IFNG|PRKCA|TGFB1|TNF|TRAF6	-8.5	MyList
GO Biological Processes	19	GO:0045667	regulation of osteoblast differentiation	19_GO:0032502 developmental process	-10	14	12	30284	156	172	12	7	1.9	655|1499|2247|2263|2932|3479|3569|3727|5468|5728|7124|7422	BMP7|CTNNB1|FGF2|FGFR2|GSK3B|IGF1|IL6|JUND|PPARG|PTEN|TNF|VEGFA	-8.5	MyList
GO Biological Processes	19	GO:0090066	regulation of anatomical structure size	19_GO:0065007 biological regulation	-10	6.6	9.6	30284	508	172	19	11	2.4	627|857|875|1385|1906|1956|2475|2932|4137|4313|4846|5290|5728|5743|6387|6647|6648|7124|7422	BDNF|CAV1|CBS|CREB1|EDN1|EGFR|MTOR|GSK3B|MAPT|MMP2|NOS3|PIK3CA|PTEN|PTGS2|CXCL12|SOD1|SOD2|TNF|VEGFA	-8.5	MyList
GO Biological Processes	19	GO:0000902	cell morphogenesis	19_GO:0032502 developmental process	-10	5.5	9.1	30284	706	172	22	13	2.5	367|596|627|655|836|1000|1385|1432|1499|1906|1956|2064|2263|3480|4233|5728|5781|6387|6647|6868|7040|7422	AR|BCL2|BDNF|BMP7|CASP3|CDH2|CREB1|MAPK14|CTNNB1|EDN1|EGFR|ERBB2|FGFR2|IGF1R|MET|PTEN|PTPN11|CXCL12|SOD1|ADAM17|TGFB1|VEGFA	-8.5	MyList
GO Biological Processes	19	GO:0032570	response to progesterone	19_GO:0050896 response to stimulus	-9.9	33	16	30284	43	172	8	4.7	1.6	857|2353|2821|3480|5970|7040|8061|10062	CAV1|FOS|GPI|IGF1R|RELA|TGFB1|FOSL1|NR1H3	-8.5	MyList
GO Biological Processes	19	GO:1905475	regulation of protein localization to membrane	19_GO:0051179 localization	-9.9	12	11	30284	197	172	13	7.6	2	207|367|1000|1956|2064|3458|3958|4323|5290|5295|7040|7124|7189	AKT1|AR|CDH2|EGFR|ERBB2|IFNG|LGALS3|MMP14|PIK3CA|PIK3R1|TGFB1|TNF|TRAF6	-8.4	MyList
GO Biological Processes	19	GO:0032757	positive regulation of interleukin-8 production	19_GO:0032501 multicellular organismal process	-9.9	24	14	30284	65	172	9	5.2	1.7	1991|3553|3569|4843|5970|6774|6850|7099|7124	ELANE|IL1B|IL6|NOS2|RELA|STAT3|SYK|TLR4|TNF	-8.4	MyList
GO Biological Processes	19	GO:0098869	cellular oxidant detoxification	19_GO:0098754 detoxification	-9.9	19	13	30284	92	172	10	5.8	1.8	213|847|2936|2950|4353|4846|5742|5743|6647|6648	ALB|CAT|GSR|GSTP1|MPO|NOS3|PTGS1|PTGS2|SOD1|SOD2	-8.4	MyList
GO Biological Processes	19	GO:0046890	regulation of lipid biosynthetic process	19_GO:0050789 regulation of biological process	-9.9	12	11	30284	199	172	13	7.6	2	207|1385|2475|2908|3458|3480|3553|4790|5594|5743|6721|7124|10062	AKT1|CREB1|MTOR|NR3C1|IFNG|IGF1R|IL1B|NFKB1|MAPK1|PTGS2|SREBF2|TNF|NR1H3	-8.4	MyList
GO Biological Processes	19	GO:0036296	response to increased oxygen levels	19_GO:0050896 response to stimulus	-9.9	46	18	30284	27	172	7	4.1	1.5	355|847|857|1026|2308|4313|6648	FAS|CAT|CAV1|CDKN1A|FOXO1|MMP2|SOD2	-8.4	MyList
GO Biological Processes	19	GO:0033135	regulation of peptidyl-serine phosphorylation	19_GO:0050789 regulation of biological process	-9.9	24	14	30284	66	172	9	5.2	1.7	207|673|857|1956|3458|3569|5728|5894|7124	AKT1|BRAF|CAV1|EGFR|IFNG|IL6|PTEN|RAF1|TNF	-8.4	MyList
GO Biological Processes	19	GO:0031099	regeneration	19_GO:0032502 developmental process	-9.8	13	12	30284	160	172	12	7	1.9	595|596|1026|1956|2255|3479|3569|3586|4313|6387|7040|7124	CCND1|BCL2|CDKN1A|EGFR|FGF10|IGF1|IL6|IL10|MMP2|CXCL12|TGFB1|TNF	-8.4	MyList
GO Biological Processes	19	GO:1904892	regulation of receptor signaling pathway via STAT	19_GO:0050896 response to stimulus	-9.8	19	13	30284	93	172	10	5.8	1.8	857|1950|2147|3569|3586|3815|5468|6352|7040|407006	CAV1|EGF|F2|IL6|IL10|KIT|PPARG|CCL5|TGFB1|MIR221	-8.4	MyList
GO Biological Processes	19	GO:2000177	regulation of neural precursor cell proliferation	19_GO:0050789 regulation of biological process	-9.8	19	13	30284	93	172	10	5.8	1.8	1000|1499|1950|2247|2308|2309|3091|7040|7157|7422	CDH2|CTNNB1|EGF|FGF2|FOXO1|FOXO3|HIF1A|TGFB1|TP53|VEGFA	-8.4	MyList
GO Biological Processes	19	GO:0098727	maintenance of cell number	19_GO:0032502 developmental process	-9.8	15	12	30284	125	172	11	6.4	1.9	673|1000|1499|2255|2308|2309|3479|3815|5894|6774|23569	BRAF|CDH2|CTNNB1|FGF10|FOXO1|FOXO3|IGF1|KIT|RAF1|STAT3|PADI4	-8.3	MyList
GO Biological Processes	19	GO:0120035	regulation of plasma membrane bounded cell projection organization	19_GO:0050789 regulation of biological process	-9.8	5.7	9.1	30284	650	172	21	12	2.5	207|627|655|673|857|2260|2475|2932|3480|3815|4137|4780|5290|5295|5604|5728|6387|7046|7422|7431|407006	AKT1|BDNF|BMP7|BRAF|CAV1|FGFR1|MTOR|GSK3B|IGF1R|KIT|MAPT|NFE2L2|PIK3CA|PIK3R1|MAP2K1|PTEN|CXCL12|TGFBR1|VEGFA|VIM|MIR221	-8.3	MyList
GO Biological Processes	19	GO:0010959	regulation of metal ion transport	19_GO:0051179 localization	-9.8	7.4	9.8	30284	403	172	17	9.9	2.3	207|581|596|857|920|1499|1950|2147|3458|3627|3958|4846|5294|5743|6352|6387|7040	AKT1|BAX|BCL2|CAV1|CD4|CTNNB1|EGF|F2|IFNG|CXCL10|LGALS3|NOS3|PIK3CG|PTGS2|CCL5|CXCL12|TGFB1	-8.3	MyList
GO Biological Processes	19	GO:1902894	negative regulation of miRNA transcription	19_GO:0048519 negative regulation of biological process	-9.7	44	17	30284	28	172	7	4.1	1.5	2099|3091|5468|5970|7040|7124|7422	ESR1|HIF1A|PPARG|RELA|TGFB1|TNF|VEGFA	-8.3	MyList
GO Biological Processes	19	GO:0090276	regulation of peptide hormone secretion	19_GO:0051179 localization	-9.7	11	11	30284	204	172	13	7.6	2	240|1956|2147|2308|3091|3458|3553|3569|4843|5578|5781|6352|7124	ALOX5|EGFR|F2|FOXO1|HIF1A|IFNG|IL1B|IL6|NOS2|PRKCA|PTPN11|CCL5|TNF	-8.3	MyList
GO Biological Processes	19	GO:0002221	pattern recognition receptor signaling pathway	19_GO:0044419 biological process involved in interspecies interaction between organisms	-9.7	15	12	30284	128	172	11	6.4	1.9	834|1520|3551|4792|5970|6850|7099|7124|7189|8061|114548	CASP1|CTSS|IKBKB|NFKBIA|RELA|SYK|TLR4|TNF|TRAF6|FOSL1|NLRP3	-8.2	MyList
GO Biological Processes	19	GO:0097237	cellular response to toxic substance	19_GO:0050896 response to stimulus	-9.7	15	12	30284	128	172	11	6.4	1.9	213|847|2936|2950|4353|4846|5742|5743|6647|6648|7124	ALB|CAT|GSR|GSTP1|MPO|NOS3|PTGS1|PTGS2|SOD1|SOD2|TNF	-8.2	MyList
GO Biological Processes	19	GO:0060711	labyrinthine layer development	19_GO:0032502 developmental process	-9.7	31	15	30284	46	172	8	4.7	1.6	207|655|841|2263|3586|3726|5594|5604	AKT1|BMP7|CASP8|FGFR2|IL10|JUNB|MAPK1|MAP2K1	-8.2	MyList
GO Biological Processes	19	GO:0034284	response to monosaccharide	19_GO:0050896 response to stimulus	-9.7	13	11	30284	165	172	12	7	1.9	836|847|2309|3091|3480|5290|5743|5894|6648|7040|7124|407006	CASP3|CAT|FOXO3|HIF1A|IGF1R|PIK3CA|PTGS2|RAF1|SOD2|TGFB1|TNF|MIR221	-8.2	MyList
GO Biological Processes	19	GO:0002429	immune response-activating cell surface receptor signaling pathway	19_GO:0002376 immune system process	-9.7	9.8	11	30284	251	172	14	8.1	2.1	581|596|673|3458|3551|4790|4792|4843|5290|5594|5970|6850|7099|7189	BAX|BCL2|BRAF|IFNG|IKBKB|NFKB1|NFKBIA|NOS2|PIK3CA|MAPK1|RELA|SYK|TLR4|TRAF6	-8.2	MyList
GO Biological Processes	19	GO:0002791	regulation of peptide secretion	19_GO:0051179 localization	-9.7	11	11	30284	207	172	13	7.6	2	240|1956|2147|2308|3091|3458|3553|3569|4843|5578|5781|6352|7124	ALOX5|EGFR|F2|FOXO1|HIF1A|IFNG|IL1B|IL6|NOS2|PRKCA|PTPN11|CCL5|TNF	-8.2	MyList
GO Biological Processes	19	GO:1903035	negative regulation of response to wounding	19_GO:0048519 negative regulation of biological process	-9.7	18	13	30284	97	172	10	5.8	1.8	240|1906|2147|2247|4846|5327|5328|5728|6774|7124	ALOX5|EDN1|F2|FGF2|NOS3|PLAT|PLAU|PTEN|STAT3|TNF	-8.2	MyList
GO Biological Processes	19	GO:0007435	salivary gland morphogenesis	19_GO:0032502 developmental process	-9.6	42	17	30284	29	172	7	4.1	1.5	655|1956|2255|2260|2263|7040|7124	BMP7|EGFR|FGF10|FGFR1|FGFR2|TGFB1|TNF	-8.1	MyList
GO Biological Processes	19	GO:0002444	myeloid leukocyte mediated immunity	19_GO:0002376 immune system process	-9.6	23	14	30284	70	172	9	5.2	1.7	1511|1991|2147|3569|3815|5294|6850|6868|54210	CTSG|ELANE|F2|IL6|KIT|PIK3CG|SYK|ADAM17|TREM1	-8.1	MyList
GO Biological Processes	19	GO:0031344	regulation of cell projection organization	19_GO:0050789 regulation of biological process	-9.6	5.5	9	30284	667	172	21	12	2.5	207|627|655|673|857|2260|2475|2932|3480|3815|4137|4780|5290|5295|5604|5728|6387|7046|7422|7431|407006	AKT1|BDNF|BMP7|BRAF|CAV1|FGFR1|MTOR|GSK3B|IGF1R|KIT|MAPT|NFE2L2|PIK3CA|PIK3R1|MAP2K1|PTEN|CXCL12|TGFBR1|VEGFA|VIM|MIR221	-8.1	MyList
GO Biological Processes	19	GO:0022411	cellular component disassembly	19_GO:0009987 cellular process	-9.6	8.7	10	30284	305	172	15	8.7	2.2	1511|1513|1520|1991|2932|4312|4313|4314|4316|4317|4318|4321|4322|4323|5578	CTSG|CTSK|CTSS|ELANE|GSK3B|MMP1|MMP2|MMP3|MMP7|MMP8|MMP9|MMP12|MMP13|MMP14|PRKCA	-8.1	MyList
GO Biological Processes	19	GO:0033138	positive regulation of peptidyl-serine phosphorylation	19_GO:0048518 positive regulation of biological process	-9.5	29	15	30284	48	172	8	4.7	1.6	207|673|857|1956|3458|3569|5894|7124	AKT1|BRAF|CAV1|EGFR|IFNG|IL6|RAF1|TNF	-8.1	MyList
GO Biological Processes	19	GO:0071887	leukocyte apoptotic process	19_GO:0009987 cellular process	-9.5	29	15	30284	48	172	8	4.7	1.6	207|355|581|596|836|3569|7157|27113	AKT1|FAS|BAX|BCL2|CASP3|IL6|TP53|BBC3	-8.1	MyList
GO Biological Processes	19	GO:0002520	immune system development	19_GO:0002376 immune system process	-9.5	12	11	30284	170	172	12	7	1.9	596|673|1499|2255|5594|5604|5894|6647|6868|7040|7046|7157	BCL2|BRAF|CTNNB1|FGF10|MAPK1|MAP2K1|RAF1|SOD1|ADAM17|TGFB1|TGFBR1|TP53	-8.1	MyList
GO Biological Processes	19	GO:0006366	transcription by RNA polymerase II	19_GO:0009987 cellular process	-9.5	7.2	9.6	30284	417	172	17	9.9	2.3	142|367|1385|1432|1499|1906|2099|2247|2353|3558|4790|5295|5468|6774|7067|7157|10062	PARP1|AR|CREB1|MAPK14|CTNNB1|EDN1|ESR1|FGF2|FOS|IL2|NFKB1|PIK3R1|PPARG|STAT3|THRA|TP53|NR1H3	-8.1	MyList
GO Biological Processes	19	GO:0018193	peptidyl-amino acid modification	19_GO:0009987 cellular process	-9.5	7.8	9.8	30284	361	172	16	9.3	2.2	207|1432|1956|2064|2260|2263|2321|2932|3480|3551|4843|5578|5594|5599|6850|7046	AKT1|MAPK14|EGFR|ERBB2|FGFR1|FGFR2|FLT1|GSK3B|IGF1R|IKBKB|NOS2|PRKCA|MAPK1|MAPK8|SYK|TGFBR1	-8	MyList
GO Biological Processes	19	GO:0001822	kidney development	19_GO:0032502 developmental process	-9.5	8.6	10	30284	308	172	15	8.7	2.2	581|596|655|847|1499|1906|2247|2255|2260|2263|5175|6772|7040|7046|7422	BAX|BCL2|BMP7|CAT|CTNNB1|EDN1|FGF2|FGF10|FGFR1|FGFR2|PECAM1|STAT1|TGFB1|TGFBR1|VEGFA	-8	MyList
GO Biological Processes	19	GO:0030878	thyroid gland development	19_GO:0032502 developmental process	-9.5	41	17	30284	30	172	7	4.1	1.5	673|1906|2255|5594|5604|5894|7067	BRAF|EDN1|FGF10|MAPK1|MAP2K1|RAF1|THRA	-8	MyList
GO Biological Processes	19	GO:2000629	negative regulation of miRNA metabolic process	19_GO:0048519 negative regulation of biological process	-9.5	41	17	30284	30	172	7	4.1	1.5	2099|3091|5468|5970|7040|7124|7422	ESR1|HIF1A|PPARG|RELA|TGFB1|TNF|VEGFA	-8	MyList
GO Biological Processes	19	GO:0001889	liver development	19_GO:0032502 developmental process	-9.5	14	12	30284	134	172	11	6.4	1.9	595|1956|3569|3586|4233|5009|5290|5970|6648|7040|7124	CCND1|EGFR|IL6|IL10|MET|OTC|PIK3CA|RELA|SOD2|TGFB1|TNF	-8	MyList
GO Biological Processes	19	GO:0002703	regulation of leukocyte mediated immunity	19_GO:0002376 immune system process	-9.5	9.5	10	30284	260	172	14	8.1	2.1	196|3553|3558|3569|3586|3606|3815|4843|6850|7040|7099|7124|7189|114548	AHR|IL1B|IL2|IL6|IL10|IL18|KIT|NOS2|SYK|TGFB1|TLR4|TNF|TRAF6|NLRP3	-8	MyList
GO Biological Processes	19	GO:0052547	regulation of peptidase activity	19_GO:0050789 regulation of biological process	-9.5	11	11	30284	214	172	13	7.6	2	207|355|834|841|4318|5894|6774|7076|7077|7124|7422|7498|27113	AKT1|FAS|CASP1|CASP8|MMP9|RAF1|STAT3|TIMP1|TIMP2|TNF|VEGFA|XDH|BBC3	-8	MyList
GO Biological Processes	19	GO:0036323	vascular endothelial growth factor receptor-1 signaling pathway	19_GO:0050896 response to stimulus	-9.5	29	15	30284	49	172	8	4.7	1.6	1956|2064|2260|2263|2321|3480|3815|4233	EGFR|ERBB2|FGFR1|FGFR2|FLT1|IGF1R|KIT|MET	-8	MyList
GO Biological Processes	19	GO:0030225	macrophage differentiation	19_GO:0032502 developmental process	-9.5	29	15	30284	49	172	8	4.7	1.6	142|841|920|2908|3458|4318|7099|7422	PARP1|CASP8|CD4|NR3C1|IFNG|MMP9|TLR4|VEGFA	-8	MyList
GO Biological Processes	19	GO:0007369	gastrulation	19_GO:0032502 developmental process	-9.5	12	11	30284	173	172	12	7	1.9	655|1499|2263|2821|3685|4313|4317|4318|4323|5604|7048|7157	BMP7|CTNNB1|FGFR2|GPI|ITGAV|MMP2|MMP8|MMP9|MMP14|MAP2K1|TGFBR2|TP53	-8	MyList
GO Biological Processes	19	GO:0045670	regulation of osteoclast differentiation	19_GO:0002376 immune system process	-9.5	22	13	30284	73	172	9	5.2	1.7	1385|1499|2353|2475|3458|5295|7099|7124|7189	CREB1|CTNNB1|FOS|MTOR|IFNG|PIK3R1|TLR4|TNF|TRAF6	-8	MyList
GO Biological Processes	19	GO:0050796	regulation of insulin secretion	19_GO:0051179 localization	-9.4	12	11	30284	174	172	12	7	1.9	240|2147|2308|3091|3458|3553|3569|4843|5578|5781|6352|7124	ALOX5|F2|FOXO1|HIF1A|IFNG|IL1B|IL6|NOS2|PRKCA|PTPN11|CCL5|TNF	-8	MyList
GO Biological Processes	19	GO:0048565	digestive tract development	19_GO:0032502 developmental process	-9.4	14	12	30284	136	172	11	6.4	1.9	596|1026|1499|1956|2255|2263|3091|3815|5009|7040|7124	BCL2|CDKN1A|CTNNB1|EGFR|FGF10|FGFR2|HIF1A|KIT|OTC|TGFB1|TNF	-8	MyList
GO Biological Processes	19	GO:0060603	mammary gland duct morphogenesis	19_GO:0032502 developmental process	-9.4	40	16	30284	31	172	7	4.1	1.5	367|2099|2255|2263|2908|5241|7040	AR|ESR1|FGF10|FGFR2|NR3C1|PGR|TGFB1	-7.9	MyList
GO Biological Processes	19	GO:0061045	negative regulation of wound healing	19_GO:0048519 negative regulation of biological process	-9.4	21	13	30284	74	172	9	5.2	1.7	240|1906|2147|2247|4846|5327|5328|5728|7124	ALOX5|EDN1|F2|FGF2|NOS3|PLAT|PLAU|PTEN|TNF	-7.9	MyList
GO Biological Processes	19	GO:0032732	positive regulation of interleukin-1 production	19_GO:0032501 multicellular organismal process	-9.4	21	13	30284	74	172	9	5.2	1.7	834|841|3458|3569|5970|6774|7099|7124|114548	CASP1|CASP8|IFNG|IL6|RELA|STAT3|TLR4|TNF|NLRP3	-7.9	MyList
GO Biological Processes	19	GO:0046620	regulation of organ growth	19_GO:0040007 growth	-9.4	17	12	30284	103	172	10	5.8	1.8	207|1432|1906|2247|2260|2263|3479|5728|6647|7046	AKT1|MAPK14|EDN1|FGF2|FGFR1|FGFR2|IGF1|PTEN|SOD1|TGFBR1	-7.9	MyList
GO Biological Processes	19	GO:0035790	platelet-derived growth factor receptor-alpha signaling pathway	19_GO:0050896 response to stimulus	-9.4	28	15	30284	50	172	8	4.7	1.6	1956|2064|2260|2263|2321|3480|3815|4233	EGFR|ERBB2|FGFR1|FGFR2|FLT1|IGF1R|KIT|MET	-7.9	MyList
GO Biological Processes	19	GO:0061008	hepaticobiliary system development	19_GO:0032502 developmental process	-9.4	14	12	30284	137	172	11	6.4	1.9	595|1956|3569|3586|4233|5009|5290|5970|6648|7040|7124	CCND1|EGFR|IL6|IL10|MET|OTC|PIK3CA|RELA|SOD2|TGFB1|TNF	-7.9	MyList
GO Biological Processes	19	GO:0032675	regulation of interleukin-6 production	19_GO:0032501 multicellular organismal process	-9.3	12	11	30284	177	172	12	7	1.9	3458|3553|3569|3586|4843|5970|6774|6850|7040|7099|7124|7189	IFNG|IL1B|IL6|IL10|NOS2|RELA|STAT3|SYK|TGFB1|TLR4|TNF|TRAF6	-7.9	MyList
GO Biological Processes	19	GO:0038109	Kit signaling pathway	19_GO:0050896 response to stimulus	-9.3	28	14	30284	51	172	8	4.7	1.6	1956|2064|2260|2263|2321|3480|3815|4233	EGFR|ERBB2|FGFR1|FGFR2|FLT1|IGF1R|KIT|MET	-7.9	MyList
GO Biological Processes	19	GO:0036216	cellular response to stem cell factor stimulus	19_GO:0050896 response to stimulus	-9.3	28	14	30284	51	172	8	4.7	1.6	1956|2064|2260|2263|2321|3480|3815|4233	EGFR|ERBB2|FGFR1|FGFR2|FLT1|IGF1R|KIT|MET	-7.9	MyList
GO Biological Processes	19	GO:0036215	response to stem cell factor	19_GO:0050896 response to stimulus	-9.3	28	14	30284	51	172	8	4.7	1.6	1956|2064|2260|2263|2321|3480|3815|4233	EGFR|ERBB2|FGFR1|FGFR2|FLT1|IGF1R|KIT|MET	-7.9	MyList
GO Biological Processes	19	GO:0038145	macrophage colony-stimulating factor signaling pathway	19_GO:0050896 response to stimulus	-9.3	28	14	30284	51	172	8	4.7	1.6	1956|2064|2260|2263|2321|3480|3815|4233	EGFR|ERBB2|FGFR1|FGFR2|FLT1|IGF1R|KIT|MET	-7.9	MyList
GO Biological Processes	19	GO:0046456	icosanoid biosynthetic process	19_GO:0009987 cellular process	-9.3	28	14	30284	51	172	8	4.7	1.6	240|834|1559|1906|4282|5742|5743|6850	ALOX5|CASP1|CYP2C9|EDN1|MIF|PTGS1|PTGS2|SYK	-7.9	MyList
GO Biological Processes	19	GO:0042102	positive regulation of T cell proliferation	19_GO:0002376 immune system process	-9.3	17	12	30284	105	172	10	5.8	1.8	3479|3553|3558|3569|3606|6352|6850|7048|7189|7412	IGF1|IL1B|IL2|IL6|IL18|CCL5|SYK|TGFBR2|TRAF6|VCAM1	-7.9	MyList
GO Biological Processes	19	GO:0032677	regulation of interleukin-8 production	19_GO:0032501 multicellular organismal process	-9.3	17	12	30284	105	172	10	5.8	1.8	1991|3553|3569|3586|4843|5970|6774|6850|7099|7124	ELANE|IL1B|IL6|IL10|NOS2|RELA|STAT3|SYK|TLR4|TNF	-7.9	MyList
GO Biological Processes	19	GO:0072001	renal system development	19_GO:0032502 developmental process	-9.3	8.3	9.9	30284	319	172	15	8.7	2.2	581|596|655|847|1499|1906|2247|2255|2260|2263|5175|6772|7040|7046|7422	BAX|BCL2|BMP7|CAT|CTNNB1|EDN1|FGF2|FGF10|FGFR1|FGFR2|PECAM1|STAT1|TGFB1|TGFBR1|VEGFA	-7.9	MyList
GO Biological Processes	19	GO:0010575	positive regulation of vascular endothelial growth factor production	19_GO:0032501 multicellular organismal process	-9.3	39	16	30284	32	172	7	4.1	1.5	3091|3553|3569|5743|5970|6774|7040	HIF1A|IL1B|IL6|PTGS2|RELA|STAT3|TGFB1	-7.9	MyList
GO Biological Processes	19	GO:0071621	granulocyte chemotaxis	19_GO:0040011 locomotion	-9.3	21	13	30284	76	172	9	5.2	1.7	3553|3627|3958|5294|6352|6367|6850|7422|54210	IL1B|CXCL10|LGALS3|PIK3CG|CCL5|CCL22|SYK|VEGFA|TREM1	-7.8	MyList
GO Biological Processes	19	GO:0050818	regulation of coagulation	19_GO:0032501 multicellular organismal process	-9.3	21	13	30284	76	172	9	5.2	1.7	308|857|1906|2147|2191|4780|4846|5327|5328	ANXA5|CAV1|EDN1|F2|FAP|NFE2L2|NOS3|PLAT|PLAU	-7.8	MyList
GO Biological Processes	19	GO:0001906	cell killing	19_GO:0009987 cellular process	-9.3	12	11	30284	179	172	12	7	1.9	1511|1991|2147|3606|3627|3958|5295|5320|6361|6367|6387|54210	CTSG|ELANE|F2|IL18|CXCL10|LGALS3|PIK3R1|PLA2G2A|CCL17|CCL22|CXCL12|TREM1	-7.8	MyList
GO Biological Processes	19	GO:0050829	defense response to Gram-negative bacterium	19_GO:0044419 biological process involved in interspecies interaction between organisms	-9.3	17	12	30284	106	172	10	5.8	1.8	920|1511|1991|2147|3569|4316|4843|6403|7099|54210	CD4|CTSG|ELANE|F2|IL6|MMP7|NOS2|SELP|TLR4|TREM1	-7.8	MyList
GO Biological Processes	19	GO:0060571	morphogenesis of an epithelial fold	19_GO:0032502 developmental process	-9.3	59	19	30284	18	172	6	3.5	1.4	367|655|1956|2255|2263|3091	AR|BMP7|EGFR|FGF10|FGFR2|HIF1A	-7.8	MyList
GO Biological Processes	19	GO:0051345	positive regulation of hydrolase activity	19_GO:0065007 biological regulation	-9.2	9.1	10	30284	271	172	14	8.1	2.1	207|355|834|841|2260|2263|2932|3458|6352|6774|7124|7498|10062|27113	AKT1|FAS|CASP1|CASP8|FGFR1|FGFR2|GSK3B|IFNG|CCL5|STAT3|TNF|XDH|NR1H3|BBC3	-7.8	MyList
GO Biological Processes	19	GO:0035265	organ growth	19_GO:0040007 growth	-9.2	16	12	30284	107	172	10	5.8	1.8	367|596|1588|2099|2255|2260|2263|4322|5781|7048	AR|BCL2|CYP19A1|ESR1|FGF10|FGFR1|FGFR2|MMP13|PTPN11|TGFBR2	-7.8	MyList
GO Biological Processes	19	GO:0097306	cellular response to alcohol	19_GO:0050896 response to stimulus	-9.2	16	12	30284	107	172	10	5.8	1.8	196|207|1385|1499|1646|1788|2309|2353|3480|6648	AHR|AKT1|CREB1|CTNNB1|AKR1C2|DNMT3A|FOXO3|FOS|IGF1R|SOD2	-7.8	MyList
GO Biological Processes	19	GO:0090068	positive regulation of cell cycle process	19_GO:0048518 positive regulation of biological process	-9.2	9	10	30284	273	172	14	8.1	2.1	207|595|1906|1950|1956|2255|2260|3479|3480|3553|6868|7040|7124|407006	AKT1|CCND1|EDN1|EGF|EGFR|FGF10|FGFR1|IGF1|IGF1R|IL1B|ADAM17|TGFB1|TNF|MIR221	-7.8	MyList
GO Biological Processes	19	GO:0010743	regulation of macrophage derived foam cell differentiation	19_GO:0032502 developmental process	-9.2	37	16	30284	33	172	7	4.1	1.5	3606|3685|4790|4792|5320|5468|10062	IL18|ITGAV|NFKB1|NFKBIA|PLA2G2A|PPARG|NR1H3	-7.8	MyList
GO Biological Processes	19	GO:0007431	salivary gland development	19_GO:0032502 developmental process	-9.2	37	16	30284	33	172	7	4.1	1.5	655|1956|2255|2260|2263|7040|7124	BMP7|EGFR|FGF10|FGFR1|FGFR2|TGFB1|TNF	-7.8	MyList
GO Biological Processes	19	GO:0010564	regulation of cell cycle process	19_GO:0050789 regulation of biological process	-9.2	5	8.5	30284	776	172	22	13	2.5	207|595|596|655|1026|1432|1499|1906|1950|1956|2255|2260|3479|3480|3553|5728|5781|6868|7040|7124|7157|407006	AKT1|CCND1|BCL2|BMP7|CDKN1A|MAPK14|CTNNB1|EDN1|EGF|EGFR|FGF10|FGFR1|IGF1|IGF1R|IL1B|PTEN|PTPN11|ADAM17|TGFB1|TNF|TP53|MIR221	-7.7	MyList
GO Biological Processes	19	GO:0033209	tumor necrosis factor-mediated signaling pathway	19_GO:0050896 response to stimulus	-9.2	27	14	30284	53	172	8	4.7	1.6	355|2309|3551|4792|5970|6772|7124|7157	FAS|FOXO3|IKBKB|NFKBIA|RELA|STAT1|TNF|TP53	-7.7	MyList
GO Biological Processes	19	GO:0060828	regulation of canonical Wnt signaling pathway	19_GO:0050896 response to stimulus	-9.1	8.9	10	30284	277	172	14	8.1	2.1	857|1000|1432|1499|1950|1956|2247|2255|2263|2308|2309|2932|4790|7040	CAV1|CDH2|MAPK14|CTNNB1|EGF|EGFR|FGF2|FGF10|FGFR2|FOXO1|FOXO3|GSK3B|NFKB1|TGFB1	-7.7	MyList
GO Biological Processes	19	GO:0010543	regulation of platelet activation	19_GO:0032501 multicellular organismal process	-9.1	26	14	30284	54	172	8	4.7	1.6	1511|2147|3569|4846|5578|6403|6850|7099	CTSG|F2|IL6|NOS3|PRKCA|SELP|SYK|TLR4	-7.7	MyList
GO Biological Processes	19	GO:0019752	carboxylic acid metabolic process	19_GO:0009987 cellular process	-9.1	4.9	8.5	30284	783	172	22	13	2.5	240|834|875|1432|1559|1645|1646|1906|2821|2950|3091|3479|4282|4843|4846|5009|5468|5742|5743|6850|7157|7167	ALOX5|CASP1|CBS|MAPK14|CYP2C9|AKR1C1|AKR1C2|EDN1|GPI|GSTP1|HIF1A|IGF1|MIF|NOS2|NOS3|OTC|PPARG|PTGS1|PTGS2|SYK|TP53|TPI1	-7.7	MyList
GO Biological Processes	19	GO:1900180	regulation of protein localization to nucleus	19_GO:0051179 localization	-9.1	13	11	30284	146	172	11	6.4	1.9	142|207|1432|1906|2147|2475|2932|3458|5295|5743|7040	PARP1|AKT1|MAPK14|EDN1|F2|MTOR|GSK3B|IFNG|PIK3R1|PTGS2|TGFB1	-7.7	MyList
GO Biological Processes	19	GO:0009755	hormone-mediated signaling pathway	19_GO:0050896 response to stimulus	-9.1	13	11	30284	146	172	11	6.4	1.9	367|2099|2100|2908|5241|5468|5594|5781|5970|7067|10062	AR|ESR1|ESR2|NR3C1|PGR|PPARG|MAPK1|PTPN11|RELA|THRA|NR1H3	-7.7	MyList
GO Biological Processes	19	GO:0002758	innate immune response-activating signaling pathway	19_GO:0044419 biological process involved in interspecies interaction between organisms	-9.1	13	11	30284	147	172	11	6.4	1.9	834|1520|3551|4792|5970|6850|7099|7124|7189|8061|114548	CASP1|CTSS|IKBKB|NFKBIA|RELA|SYK|TLR4|TNF|TRAF6|FOSL1|NLRP3	-7.6	MyList
GO Biological Processes	19	GO:0043467	regulation of generation of precursor metabolites and energy	19_GO:0050789 regulation of biological process	-9.1	13	11	30284	147	172	11	6.4	1.9	207|2475|2932|3091|3458|3479|4843|5290|6774|7124|7157	AKT1|MTOR|GSK3B|HIF1A|IFNG|IGF1|NOS2|PIK3CA|STAT3|TNF|TP53	-7.6	MyList
GO Biological Processes	19	GO:0060249	anatomical structure homeostasis	19_GO:0042592 homeostatic process	-9.1	9.9	10	30284	232	172	13	7.6	2	581|596|1499|1513|3569|4846|5175|5743|5781|6647|7099|7189|7422	BAX|BCL2|CTNNB1|CTSK|IL6|NOS3|PECAM1|PTGS2|PTPN11|SOD1|TLR4|TRAF6|VEGFA	-7.6	MyList
GO Biological Processes	19	GO:0001894	tissue homeostasis	19_GO:0042592 homeostatic process	-9.1	9.9	10	30284	232	172	13	7.6	2	581|596|1499|1513|3569|4846|5175|5743|5781|6647|7099|7189|7422	BAX|BCL2|CTNNB1|CTSK|IL6|NOS3|PECAM1|PTGS2|PTPN11|SOD1|TLR4|TRAF6|VEGFA	-7.6	MyList
GO Biological Processes	19	GO:0010883	regulation of lipid storage	19_GO:0051179 localization	-9	26	14	30284	55	172	8	4.7	1.6	3569|3685|4790|4792|5468|6721|7124|10062	IL6|ITGAV|NFKB1|NFKBIA|PPARG|SREBF2|TNF|NR1H3	-7.6	MyList
GO Biological Processes	19	GO:0036006	cellular response to macrophage colony-stimulating factor stimulus	19_GO:0050896 response to stimulus	-9	26	14	30284	55	172	8	4.7	1.6	1956|2064|2260|2263|2321|3480|3815|4233	EGFR|ERBB2|FGFR1|FGFR2|FLT1|IGF1R|KIT|MET	-7.6	MyList
GO Biological Processes	19	GO:0001818	negative regulation of cytokine production	19_GO:0048519 negative regulation of biological process	-9	7.2	9.4	30284	389	172	16	9.3	2.2	836|1991|2147|2260|2950|3458|3479|3569|3586|4790|5781|7040|7099|7124|114548|407006	CASP3|ELANE|F2|FGFR1|GSTP1|IFNG|IGF1|IL6|IL10|NFKB1|PTPN11|TGFB1|TLR4|TNF|NLRP3|MIR221	-7.6	MyList
GO Biological Processes	19	GO:1902176	negative regulation of oxidative stress-induced intrinsic apoptotic signaling pathway	19_GO:0048519 negative regulation of biological process	-9	35	15	30284	35	172	7	4.1	1.5	207|1499|2247|3091|3586|4780|6648	AKT1|CTNNB1|FGF2|HIF1A|IL10|NFE2L2|SOD2	-7.6	MyList
GO Biological Processes	19	GO:1905954	positive regulation of lipid localization	19_GO:0051179 localization	-9	16	12	30284	113	172	10	5.8	1.8	857|1588|1906|3553|4282|4790|4792|5468|6721|10062	CAV1|CYP19A1|EDN1|IL1B|MIF|NFKB1|NFKBIA|PPARG|SREBF2|NR1H3	-7.6	MyList
GO Biological Processes	19	GO:0098754	detoxification	19_GO:0098754 detoxification	-9	13	11	30284	149	172	11	6.4	1.9	213|847|2936|2950|4353|4780|4846|5742|5743|6647|6648	ALB|CAT|GSR|GSTP1|MPO|NFE2L2|NOS3|PTGS1|PTGS2|SOD1|SOD2	-7.6	MyList
GO Biological Processes	19	GO:0055123	digestive system development	19_GO:0032502 developmental process	-9	13	11	30284	149	172	11	6.4	1.9	596|1026|1499|1956|2255|2263|3091|3815|5009|7040|7124	BCL2|CDKN1A|CTNNB1|EGFR|FGF10|FGFR2|HIF1A|KIT|OTC|TGFB1|TNF	-7.6	MyList
GO Biological Processes	19	GO:0048012	hepatocyte growth factor receptor signaling pathway	19_GO:0050896 response to stimulus	-9	25	14	30284	56	172	8	4.7	1.6	1956|2064|2260|2263|2321|3480|3815|4233	EGFR|ERBB2|FGFR1|FGFR2|FLT1|IGF1R|KIT|MET	-7.6	MyList
GO Biological Processes	19	GO:0035791	platelet-derived growth factor receptor-beta signaling pathway	19_GO:0050896 response to stimulus	-9	25	14	30284	56	172	8	4.7	1.6	1956|2064|2260|2263|2321|3480|3815|4233	EGFR|ERBB2|FGFR1|FGFR2|FLT1|IGF1R|KIT|MET	-7.6	MyList
GO Biological Processes	19	GO:0016485	protein processing	19_GO:0009987 cellular process	-9	11	11	30284	191	172	12	7	1.9	142|715|834|836|841|1511|1520|1803|4323|5327|5328|6868	PARP1|C1R|CASP1|CASP3|CASP8|CTSG|CTSS|DPP4|MMP14|PLAT|PLAU|ADAM17	-7.5	MyList
GO Biological Processes	19	GO:0061377	mammary gland lobule development	19_GO:0032502 developmental process	-9	53	18	30284	20	172	6	3.5	1.4	367|595|1950|2099|3091|7422	AR|CCND1|EGF|ESR1|HIF1A|VEGFA	-7.5	MyList
GO Biological Processes	19	GO:0060749	mammary gland alveolus development	19_GO:0032502 developmental process	-9	53	18	30284	20	172	6	3.5	1.4	367|595|1950|2099|3091|7422	AR|CCND1|EGF|ESR1|HIF1A|VEGFA	-7.5	MyList
GO Biological Processes	19	GO:0045580	regulation of T cell differentiation	19_GO:0002376 immune system process	-8.9	11	11	30284	192	172	12	7	1.9	673|2064|2309|3458|3558|3606|3726|6647|6850|7040|7048|114548	BRAF|ERBB2|FOXO3|IFNG|IL2|IL18|JUNB|SOD1|SYK|TGFB1|TGFBR2|NLRP3	-7.5	MyList
GO Biological Processes	19	GO:0045766	positive regulation of angiogenesis	19_GO:0032502 developmental process	-8.9	11	11	30284	192	172	12	7	1.9	2247|2321|3091|3553|3586|4780|4846|5578|6667|6774|7048|7422	FGF2|FLT1|HIF1A|IL1B|IL10|NFE2L2|NOS3|PRKCA|SP1|STAT3|TGFBR2|VEGFA	-7.5	MyList
GO Biological Processes	19	GO:0002065	columnar/cuboidal epithelial cell differentiation	19_GO:0032502 developmental process	-8.9	15	12	30284	115	172	10	5.8	1.8	655|857|1000|1026|1499|2247|2263|3091|5241|7040	BMP7|CAV1|CDH2|CDKN1A|CTNNB1|FGF2|FGFR2|HIF1A|PGR|TGFB1	-7.5	MyList
GO Biological Processes	19	GO:0030183	B cell differentiation	19_GO:0002376 immune system process	-8.9	15	12	30284	115	172	10	5.8	1.8	581|596|3569|3586|3815|5295|6850|6868|7157|7412	BAX|BCL2|IL6|IL10|KIT|PIK3R1|SYK|ADAM17|TP53|VCAM1	-7.5	MyList
GO Biological Processes	19	GO:0007159	leukocyte cell-cell adhesion	19_GO:0009987 cellular process	-8.9	25	14	30284	57	172	8	4.7	1.6	655|3553|5175|6352|6403|6850|7124|7412	BMP7|IL1B|PECAM1|CCL5|SELP|SYK|TNF|VCAM1	-7.5	MyList
GO Biological Processes	19	GO:0031663	lipopolysaccharide-mediated signaling pathway	19_GO:0044419 biological process involved in interspecies interaction between organisms	-8.9	34	15	30284	36	172	7	4.1	1.5	207|1432|4792|4846|5594|7099|7189	AKT1|MAPK14|NFKBIA|NOS3|MAPK1|TLR4|TRAF6	-7.5	MyList
GO Biological Processes	19	GO:0034405	response to fluid shear stress	19_GO:0050896 response to stimulus	-8.9	34	15	30284	36	172	7	4.1	1.5	207|4313|4780|4846|5743|6721|7040	AKT1|MMP2|NFE2L2|NOS3|PTGS2|SREBF2|TGFB1	-7.5	MyList
GO Biological Processes	19	GO:0141061	disruption of cell in another organism	19_GO:0044419 biological process involved in interspecies interaction between organisms	-8.9	15	12	30284	116	172	10	5.8	1.8	1511|1991|2147|3627|3958|5320|6361|6367|6387|54210	CTSG|ELANE|F2|CXCL10|LGALS3|PLA2G2A|CCL17|CCL22|CXCL12|TREM1	-7.5	MyList
GO Biological Processes	19	GO:0031640	killing of cells of another organism	19_GO:0044419 biological process involved in interspecies interaction between organisms	-8.9	15	12	30284	116	172	10	5.8	1.8	1511|1991|2147|3627|3958|5320|6361|6367|6387|54210	CTSG|ELANE|F2|CXCL10|LGALS3|PLA2G2A|CCL17|CCL22|CXCL12|TREM1	-7.5	MyList
GO Biological Processes	19	GO:0052548	regulation of endopeptidase activity	19_GO:0050789 regulation of biological process	-8.9	11	10	30284	194	172	12	7	1.9	207|355|834|841|4318|5894|6774|7076|7124|7422|7498|27113	AKT1|FAS|CASP1|CASP8|MMP9|RAF1|STAT3|TIMP1|TNF|VEGFA|XDH|BBC3	-7.5	MyList
GO Biological Processes	19	GO:0008217	regulation of blood pressure	19_GO:0032501 multicellular organismal process	-8.9	11	10	30284	194	172	12	7	1.9	367|1511|1906|4843|4846|4883|5468|5742|5743|6647|6648|7124	AR|CTSG|EDN1|NOS2|NOS3|NPR3|PPARG|PTGS1|PTGS2|SOD1|SOD2|TNF	-7.5	MyList
GO Biological Processes	19	GO:0071383	cellular response to steroid hormone stimulus	19_GO:0050896 response to stimulus	-8.9	13	11	30284	153	172	11	6.4	1.9	367|1906|1956|2099|2100|2309|2908|3480|5241|5594|7040	AR|EDN1|EGFR|ESR1|ESR2|FOXO3|NR3C1|IGF1R|PGR|MAPK1|TGFB1	-7.5	MyList
GO Biological Processes	19	GO:0071695	anatomical structure maturation	19_GO:0032502 developmental process	-8.9	9.5	10	30284	240	172	13	7.6	2	596|1026|1499|1906|2260|2309|3091|3479|4313|5241|5468|7040|7422	BCL2|CDKN1A|CTNNB1|EDN1|FGFR1|FOXO3|HIF1A|IGF1|MMP2|PGR|PPARG|TGFB1|VEGFA	-7.5	MyList
GO Biological Processes	19	GO:0007599	hemostasis	19_GO:0065007 biological regulation	-8.9	11	10	30284	195	172	12	7	1.9	308|1432|1511|2147|2821|3569|5265|5290|5294|5327|5328|6850	ANXA5|MAPK14|CTSG|F2|GPI|IL6|SERPINA1|PIK3CA|PIK3CG|PLAT|PLAU|SYK	-7.4	MyList
GO Biological Processes	19	GO:0051149	positive regulation of muscle cell differentiation	19_GO:0032502 developmental process	-8.8	19	12	30284	85	172	9	5.2	1.7	596|1432|1906|2475|3479|3815|4323|6648|7040	BCL2|MAPK14|EDN1|MTOR|IGF1|KIT|MMP14|SOD2|TGFB1	-7.4	MyList
GO Biological Processes	19	GO:0002720	positive regulation of cytokine production involved in immune response	19_GO:0002376 immune system process	-8.8	19	12	30284	85	172	9	5.2	1.7	3553|3569|3606|3815|4282|6850|7099|7189|114548	IL1B|IL6|IL18|KIT|MIF|SYK|TLR4|TRAF6|NLRP3	-7.4	MyList
GO Biological Processes	19	GO:0042113	B cell activation	19_GO:0002376 immune system process	-8.8	11	10	30284	196	172	12	7	1.9	581|596|841|3569|3586|3815|5295|6850|6868|7099|7157|7412	BAX|BCL2|CASP8|IL6|IL10|KIT|PIK3R1|SYK|ADAM17|TLR4|TP53|VCAM1	-7.4	MyList
GO Biological Processes	19	GO:0021700	developmental maturation	19_GO:0032502 developmental process	-8.8	8.4	9.7	30284	292	172	14	8.1	2.1	596|1026|1499|1906|2260|2309|3091|3479|4313|5241|5468|5728|7040|7422	BCL2|CDKN1A|CTNNB1|EDN1|FGFR1|FOXO3|HIF1A|IGF1|MMP2|PGR|PPARG|PTEN|TGFB1|VEGFA	-7.4	MyList
GO Biological Processes	19	GO:0051385	response to mineralocorticoid	19_GO:0050896 response to stimulus	-8.8	33	15	30284	37	172	7	4.1	1.5	142|1026|1906|2309|2353|3480|8061	PARP1|CDKN1A|EDN1|FOXO3|FOS|IGF1R|FOSL1	-7.4	MyList
GO Biological Processes	19	GO:0014002	astrocyte development	19_GO:0032502 developmental process	-8.8	33	15	30284	37	172	7	4.1	1.5	1956|3458|3553|4137|7099|7124|7431	EGFR|IFNG|IL1B|MAPT|TLR4|TNF|VIM	-7.4	MyList
GO Biological Processes	19	GO:1903038	negative regulation of leukocyte cell-cell adhesion	19_GO:0048519 negative regulation of biological process	-8.8	12	11	30284	155	172	11	6.4	1.9	207|836|1511|2064|3558|3586|3958|5320|6387|7040|407006	AKT1|CASP3|CTSG|ERBB2|IL2|IL10|LGALS3|PLA2G2A|CXCL12|TGFB1|MIR221	-7.4	MyList
GO Biological Processes	19	GO:1990748	cellular detoxification	19_GO:0098754 detoxification	-8.8	15	11	30284	118	172	10	5.8	1.8	213|847|2936|2950|4353|4846|5742|5743|6647|6648	ALB|CAT|GSR|GSTP1|MPO|NOS3|PTGS1|PTGS2|SOD1|SOD2	-7.4	MyList
GO Biological Processes	19	GO:0032930	positive regulation of superoxide anion generation	19_GO:0048518 positive regulation of biological process	-8.8	50	17	30284	21	172	6	3.5	1.4	1956|2950|4137|6647|6850|7040	EGFR|GSTP1|MAPT|SOD1|SYK|TGFB1	-7.4	MyList
GO Biological Processes	19	GO:1903376	regulation of oxidative stress-induced neuron intrinsic apoptotic signaling pathway	19_GO:0050896 response to stimulus	-8.8	50	17	30284	21	172	6	3.5	1.4	142|1499|2247|3091|3586|4313	PARP1|CTNNB1|FGF2|HIF1A|IL10|MMP2	-7.4	MyList
GO Biological Processes	19	GO:0071466	cellular response to xenobiotic stimulus	19_GO:0050896 response to stimulus	-8.8	11	10	30284	197	172	12	7	1.9	196|673|1559|1645|1906|1956|2950|3553|4780|4843|5447|7157	AHR|BRAF|CYP2C9|AKR1C1|EDN1|EGFR|GSTP1|IL1B|NFE2L2|NOS2|POR|TP53	-7.4	MyList
GO Biological Processes	19	GO:0034248	regulation of amide metabolic process	19_GO:0050789 regulation of biological process	-8.8	18	12	30284	86	172	9	5.2	1.7	836|2475|3458|3479|4780|5970|6667|7124|7157	CASP3|MTOR|IFNG|IGF1|NFE2L2|RELA|SP1|TNF|TP53	-7.4	MyList
GO Biological Processes	19	GO:0035296	regulation of tube diameter	19_GO:0065007 biological regulation	-8.8	12	11	30284	156	172	11	6.4	1.9	857|875|1906|1956|4313|4846|5743|6647|6648|7124|7422	CAV1|CBS|EDN1|EGFR|MMP2|NOS3|PTGS2|SOD1|SOD2|TNF|VEGFA	-7.4	MyList
GO Biological Processes	19	GO:0097746	blood vessel diameter maintenance	19_GO:0032501 multicellular organismal process	-8.8	12	11	30284	156	172	11	6.4	1.9	857|875|1906|1956|4313|4846|5743|6647|6648|7124|7422	CAV1|CBS|EDN1|EGFR|MMP2|NOS3|PTGS2|SOD1|SOD2|TNF|VEGFA	-7.4	MyList
GO Biological Processes	19	GO:0141060	disruption of anatomical structure in another organism	19_GO:0044419 biological process involved in interspecies interaction between organisms	-8.8	15	11	30284	119	172	10	5.8	1.8	1511|1991|2147|3627|3958|5320|6361|6367|6387|54210	CTSG|ELANE|F2|CXCL10|LGALS3|PLA2G2A|CCL17|CCL22|CXCL12|TREM1	-7.4	MyList
GO Biological Processes	19	GO:0035150	regulation of tube size	19_GO:0065007 biological regulation	-8.8	12	11	30284	157	172	11	6.4	1.9	857|875|1906|1956|4313|4846|5743|6647|6648|7124|7422	CAV1|CBS|EDN1|EGFR|MMP2|NOS3|PTGS2|SOD1|SOD2|TNF|VEGFA	-7.4	MyList
GO Biological Processes	19	GO:0070542	response to fatty acid	19_GO:0050896 response to stimulus	-8.7	23	13	30284	60	172	8	4.7	1.6	847|1645|1646|1906|2308|2309|5290|5743	CAT|AKR1C1|AKR1C2|EDN1|FOXO1|FOXO3|PIK3CA|PTGS2	-7.3	MyList
GO Biological Processes	19	GO:0034103	regulation of tissue remodeling	19_GO:0032501 multicellular organismal process	-8.7	18	12	30284	88	172	9	5.2	1.7	1956|3558|3569|3606|5468|5578|6850|7040|7157	EGFR|IL2|IL6|IL18|PPARG|PRKCA|SYK|TGFB1|TP53	-7.3	MyList
GO Biological Processes	19	GO:0019827	stem cell population maintenance	19_GO:0032502 developmental process	-8.7	15	11	30284	121	172	10	5.8	1.8	673|1000|1499|2255|2308|2309|3815|5894|6774|23569	BRAF|CDH2|CTNNB1|FGF10|FOXO1|FOXO3|KIT|RAF1|STAT3|PADI4	-7.3	MyList
GO Biological Processes	19	GO:0030902	hindbrain development	19_GO:0032502 developmental process	-8.7	12	11	30284	159	172	11	6.4	1.9	596|655|875|1499|1950|2247|3309|3480|5604|5781|7157	BCL2|BMP7|CBS|CTNNB1|EGF|FGF2|HSPA5|IGF1R|MAP2K1|PTPN11|TP53	-7.3	MyList
GO Biological Processes	19	GO:0030900	forebrain development	19_GO:0032502 developmental process	-8.7	6.8	9	30284	412	172	16	9.3	2.2	581|836|1000|1385|1499|1956|2247|2255|2260|2263|2353|2932|3091|3480|5728|6387	BAX|CASP3|CDH2|CREB1|CTNNB1|EGFR|FGF2|FGF10|FGFR1|FGFR2|FOS|GSK3B|HIF1A|IGF1R|PTEN|CXCL12	-7.3	MyList
GO Biological Processes	19	GO:0048645	animal organ formation	19_GO:0032502 developmental process	-8.7	32	14	30284	39	172	7	4.1	1.5	367|1499|2255|2263|5594|5604|7048	AR|CTNNB1|FGF10|FGFR2|MAPK1|MAP2K1|TGFBR2	-7.3	MyList
GO Biological Processes	19	GO:0001704	formation of primary germ layer	19_GO:0032502 developmental process	-8.6	14	11	30284	123	172	10	5.8	1.8	655|1499|2263|2821|3685|4313|4317|4318|4323|5604	BMP7|CTNNB1|FGFR2|GPI|ITGAV|MMP2|MMP8|MMP9|MMP14|MAP2K1	-7.2	MyList
GO Biological Processes	19	GO:0002822	regulation of adaptive immune response based on somatic recombination of immune receptors built from immunoglobulin superfamily domains	19_GO:0002376 immune system process	-8.6	10	10	30284	204	172	12	7	1.9	196|920|3553|3558|3569|3586|3606|3726|7040|7124|7189|114548	AHR|CD4|IL1B|IL2|IL6|IL10|IL18|JUNB|TGFB1|TNF|TRAF6|NLRP3	-7.2	MyList
GO Biological Processes	19	GO:0045861	negative regulation of proteolysis	19_GO:0048519 negative regulation of biological process	-8.6	10	10	30284	205	172	12	7	1.9	207|2147|3586|4318|5327|5328|5894|7076|7077|7157|7422|10062	AKT1|F2|IL10|MMP9|PLAT|PLAU|RAF1|TIMP1|TIMP2|TP53|VEGFA|NR1H3	-7.2	MyList
GO Biological Processes	19	GO:0071492	cellular response to UV-A	19_GO:0050896 response to stimulus	-8.6	80	20	30284	11	172	5	2.9	1.3	4312|4313|4314|4318|7076	MMP1|MMP2|MMP3|MMP9|TIMP1	-7.2	MyList
GO Biological Processes	19	GO:0006693	prostaglandin metabolic process	19_GO:0009987 cellular process	-8.6	31	14	30284	40	172	7	4.1	1.5	1645|1646|1906|2950|4282|5742|5743	AKR1C1|AKR1C2|EDN1|GSTP1|MIF|PTGS1|PTGS2	-7.2	MyList
GO Biological Processes	19	GO:0006809	nitric oxide biosynthetic process	19_GO:0009987 cellular process	-8.5	46	16	30284	23	172	6	3.5	1.4	207|857|4843|4846|5447|7099	AKT1|CAV1|NOS2|NOS3|POR|TLR4	-7.2	MyList
GO Biological Processes	19	GO:0038128	ERBB2 signaling pathway	19_GO:0050896 response to stimulus	-8.5	46	16	30284	23	172	6	3.5	1.4	1950|1956|2064|5594|5604|5894	EGF|EGFR|ERBB2|MAPK1|MAP2K1|RAF1	-7.2	MyList
GO Biological Processes	19	GO:0032928	regulation of superoxide anion generation	19_GO:0050789 regulation of biological process	-8.5	46	16	30284	23	172	6	3.5	1.4	1956|2950|4137|6647|6850|7040	EGFR|GSTP1|MAPT|SOD1|SYK|TGFB1	-7.2	MyList
GO Biological Processes	19	GO:0010888	negative regulation of lipid storage	19_GO:0051179 localization	-8.5	46	16	30284	23	172	6	3.5	1.4	3569|3685|4792|5468|7124|10062	IL6|ITGAV|NFKBIA|PPARG|TNF|NR1H3	-7.2	MyList
GO Biological Processes	19	GO:0071230	cellular response to amino acid stimulus	19_GO:0050896 response to stimulus	-8.5	17	12	30284	92	172	9	5.2	1.7	1786|1788|1956|2475|4313|4314|4780|5743|7124	DNMT1|DNMT3A|EGFR|MTOR|MMP2|MMP3|NFE2L2|PTGS2|TNF	-7.2	MyList
GO Biological Processes	19	GO:1905897	regulation of response to endoplasmic reticulum stress	19_GO:0050896 response to stimulus	-8.5	17	12	30284	92	172	9	5.2	1.7	207|240|581|857|3309|4780|5295|10062|27113	AKT1|ALOX5|BAX|CAV1|HSPA5|NFE2L2|PIK3R1|NR1H3|BBC3	-7.2	MyList
GO Biological Processes	19	GO:0090257	regulation of muscle system process	19_GO:0032501 multicellular organismal process	-8.5	8.9	9.6	30284	256	172	13	7.6	2	142|857|1906|2308|2309|3479|3815|4846|5294|5468|5578|5743|6647	PARP1|CAV1|EDN1|FOXO1|FOXO3|IGF1|KIT|NOS3|PIK3CG|PPARG|PRKCA|PTGS2|SOD1	-7.1	MyList
GO Biological Processes	19	GO:0022408	negative regulation of cell-cell adhesion	19_GO:0048519 negative regulation of biological process	-8.5	10	10	30284	209	172	12	7	1.9	207|836|1511|2064|3558|3586|3958|5320|6387|7040|7422|407006	AKT1|CASP3|CTSG|ERBB2|IL2|IL10|LGALS3|PLA2G2A|CXCL12|TGFB1|VEGFA|MIR221	-7.1	MyList
GO Biological Processes	19	GO:0045165	cell fate commitment	19_GO:0032502 developmental process	-8.5	8.9	9.6	30284	257	172	13	7.6	2	596|673|836|1499|1906|2255|2263|2475|3569|5468|6774|7046|7157	BCL2|BRAF|CASP3|CTNNB1|EDN1|FGF10|FGFR2|MTOR|IL6|PPARG|STAT3|TGFBR1|TP53	-7.1	MyList
GO Biological Processes	19	GO:0009408	response to heat	19_GO:0050896 response to stimulus	-8.5	17	12	30284	93	172	9	5.2	1.7	207|1026|2475|3479|3627|4137|4846|5743|6647	AKT1|CDKN1A|MTOR|IGF1|CXCL10|MAPT|NOS3|PTGS2|SOD1	-7.1	MyList
GO Biological Processes	19	GO:0001823	mesonephros development	19_GO:0032502 developmental process	-8.5	17	12	30284	93	172	9	5.2	1.7	596|655|847|1499|2247|2255|2260|2263|7040	BCL2|BMP7|CAT|CTNNB1|FGF2|FGF10|FGFR1|FGFR2|TGFB1	-7.1	MyList
GO Biological Processes	19	GO:0006692	prostanoid metabolic process	19_GO:0009987 cellular process	-8.5	30	14	30284	41	172	7	4.1	1.5	1645|1646|1906|2950|4282|5742|5743	AKR1C1|AKR1C2|EDN1|GSTP1|MIF|PTGS1|PTGS2	-7.1	MyList
GO Biological Processes	19	GO:0002366	leukocyte activation involved in immune response	19_GO:0002376 immune system process	-8.5	10	10	30284	210	172	12	7	1.9	2475|3458|3558|3569|3815|5294|5295|6774|6850|7099|7124|7157	MTOR|IFNG|IL2|IL6|KIT|PIK3CG|PIK3R1|STAT3|SYK|TLR4|TNF|TP53	-7.1	MyList
GO Biological Processes	19	GO:0061564	axon development	19_GO:0032502 developmental process	-8.5	6.6	8.8	30284	427	172	16	9.3	2.2	596|627|655|836|1385|1906|2064|2263|3480|4137|4313|5728|5781|6387|6868|7422	BCL2|BDNF|BMP7|CASP3|CREB1|EDN1|ERBB2|FGFR2|IGF1R|MAPT|MMP2|PTEN|PTPN11|CXCL12|ADAM17|VEGFA	-7.1	MyList
GO Biological Processes	19	GO:1900182	positive regulation of protein localization to nucleus	19_GO:0051179 localization	-8.5	17	12	30284	94	172	9	5.2	1.7	142|207|1432|1906|2147|3458|5295|5743|7040	PARP1|AKT1|MAPK14|EDN1|F2|IFNG|PIK3R1|PTGS2|TGFB1	-7.1	MyList
GO Biological Processes	19	GO:0032655	regulation of interleukin-12 production	19_GO:0032501 multicellular organismal process	-8.5	22	13	30284	65	172	8	4.7	1.6	1432|3458|3586|4790|5970|6850|7099|7189	MAPK14|IFNG|IL10|NFKB1|RELA|SYK|TLR4|TRAF6	-7.1	MyList
GO Biological Processes	19	GO:0071677	positive regulation of mononuclear cell migration	19_GO:0040011 locomotion	-8.4	17	12	30284	95	172	9	5.2	1.7	3627|3958|4323|5594|6352|6387|6868|7040|7124	CXCL10|LGALS3|MMP14|MAPK1|CCL5|CXCL12|ADAM17|TGFB1|TNF	-7	MyList
GO Biological Processes	19	GO:2000116	regulation of cysteine-type endopeptidase activity	19_GO:0050789 regulation of biological process	-8.4	14	11	30284	130	172	10	5.8	1.8	207|355|834|841|4318|5894|7124|7422|7498|27113	AKT1|FAS|CASP1|CASP8|MMP9|RAF1|TNF|VEGFA|XDH|BBC3	-7	MyList
GO Biological Processes	19	GO:0031100	animal organ regeneration	19_GO:0032502 developmental process	-8.4	21	13	30284	66	172	8	4.7	1.6	595|1026|1956|3569|3586|6387|7040|7124	CCND1|CDKN1A|EGFR|IL6|IL10|CXCL12|TGFB1|TNF	-7	MyList
GO Biological Processes	19	GO:0002263	cell activation involved in immune response	19_GO:0002376 immune system process	-8.4	9.9	9.8	30284	214	172	12	7	1.9	2475|3458|3558|3569|3815|5294|5295|6774|6850|7099|7124|7157	MTOR|IFNG|IL2|IL6|KIT|PIK3CG|PIK3R1|STAT3|SYK|TLR4|TNF|TP53	-7	MyList
GO Biological Processes	19	GO:0072091	regulation of stem cell proliferation	19_GO:0050789 regulation of biological process	-8.4	17	12	30284	96	172	9	5.2	1.7	1499|2247|2255|2260|7040|7046|7048|7157|407006	CTNNB1|FGF2|FGF10|FGFR1|TGFB1|TGFBR1|TGFBR2|TP53|MIR221	-7	MyList
GO Biological Processes	19	GO:0002690	positive regulation of leukocyte chemotaxis	19_GO:0040011 locomotion	-8.4	17	12	30284	96	172	9	5.2	1.7	1906|3569|3627|5228|5594|6352|6387|6868|7422	EDN1|IL6|CXCL10|PGF|MAPK1|CCL5|CXCL12|ADAM17|VEGFA	-7	MyList
GO Biological Processes	19	GO:0010638	positive regulation of organelle organization	19_GO:0048518 positive regulation of biological process	-8.4	6	8.5	30284	499	172	17	9.9	2.3	581|673|1499|1906|1950|2475|2932|3479|3553|4137|4233|4318|5594|7046|7124|7157|27113	BAX|BRAF|CTNNB1|EDN1|EGF|MTOR|GSK3B|IGF1|IL1B|MAPT|MET|MMP9|MAPK1|TGFBR1|TNF|TP53|BBC3	-7	MyList
GO Biological Processes	19	GO:0042176	regulation of protein catabolic process	19_GO:0050789 regulation of biological process	-8.3	7	8.9	30284	375	172	15	8.7	2.2	207|857|1956|2308|2932|3156|3458|3553|3586|4780|4843|5970|7076|7077|7124	AKT1|CAV1|EGFR|FOXO1|GSK3B|HMGCR|IFNG|IL1B|IL10|NFE2L2|NOS2|RELA|TIMP1|TIMP2|TNF	-7	MyList
GO Biological Processes	19	GO:1990776	response to angiotensin	19_GO:0050896 response to stimulus	-8.3	29	14	30284	43	172	7	4.1	1.5	760|857|3480|4780|4790|5743|5970	CA2|CAV1|IGF1R|NFE2L2|NFKB1|PTGS2|RELA	-7	MyList
GO Biological Processes	19	GO:0002218	activation of innate immune response	19_GO:0044419 biological process involved in interspecies interaction between organisms	-8.3	11	10	30284	173	172	11	6.4	1.9	834|1520|3551|4792|5970|6850|7099|7124|7189|8061|114548	CASP1|CTSS|IKBKB|NFKBIA|RELA|SYK|TLR4|TNF|TRAF6|FOSL1|NLRP3	-6.9	MyList
GO Biological Processes	19	GO:0030888	regulation of B cell proliferation	19_GO:0002376 immune system process	-8.3	21	12	30284	68	172	8	4.7	1.6	196|596|836|1026|3558|3586|4282|7099	AHR|BCL2|CASP3|CDKN1A|IL2|IL10|MIF|TLR4	-6.9	MyList
GO Biological Processes	19	GO:0002819	regulation of adaptive immune response	19_GO:0002376 immune system process	-8.3	9.6	9.7	30284	219	172	12	7	1.9	196|920|3553|3558|3569|3586|3606|3726|7040|7124|7189|114548	AHR|CD4|IL1B|IL2|IL6|IL10|IL18|JUNB|TGFB1|TNF|TRAF6|NLRP3	-6.9	MyList
GO Biological Processes	19	GO:0010828	positive regulation of D-glucose transmembrane transport	19_GO:0051179 localization	-8.3	28	14	30284	44	172	7	4.1	1.5	207|673|1432|3479|4780|5295|5781	AKT1|BRAF|MAPK14|IGF1|NFE2L2|PIK3R1|PTPN11	-6.9	MyList
GO Biological Processes	19	GO:0030193	regulation of blood coagulation	19_GO:0032501 multicellular organismal process	-8.2	20	12	30284	69	172	8	4.7	1.6	857|1906|2147|2191|4780|4846|5327|5328	CAV1|EDN1|F2|FAP|NFE2L2|NOS3|PLAT|PLAU	-6.9	MyList
GO Biological Processes	19	GO:0010632	regulation of epithelial cell migration	19_GO:0040011 locomotion	-8.2	20	12	30284	69	172	8	4.7	1.6	2255|2475|3091|3458|4318|5728|7048|407006	FGF10|MTOR|HIF1A|IFNG|MMP9|PTEN|TGFBR2|MIR221	-6.9	MyList
GO Biological Processes	19	GO:0046683	response to organophosphorus	19_GO:0050896 response to stimulus	-8.2	13	11	30284	135	172	10	5.8	1.8	196|673|1645|2353|3553|5294|5743|5970|6772|8061	AHR|BRAF|AKR1C1|FOS|IL1B|PIK3CG|PTGS2|RELA|STAT1|FOSL1	-6.9	MyList
GO Biological Processes	19	GO:0050680	negative regulation of epithelial cell proliferation	19_GO:0048519 negative regulation of biological process	-8.2	11	10	30284	176	172	11	6.4	1.9	240|367|857|2263|2321|5468|6772|7040|7046|7124|7498	ALOX5|AR|CAV1|FGFR2|FLT1|PPARG|STAT1|TGFB1|TGFBR1|TNF|XDH	-6.9	MyList
GO Biological Processes	19	GO:0045931	positive regulation of mitotic cell cycle	19_GO:0048518 positive regulation of biological process	-8.2	13	11	30284	136	172	10	5.8	1.8	207|595|1956|2255|2260|5578|5781|6868|7040|407006	AKT1|CCND1|EGFR|FGF10|FGFR1|PRKCA|PTPN11|ADAM17|TGFB1|MIR221	-6.8	MyList
GO Biological Processes	19	GO:0071402	cellular response to lipoprotein particle stimulus	19_GO:0050896 response to stimulus	-8.2	27	13	30284	45	172	7	4.1	1.5	207|5468|6721|6850|6868|7040|7099	AKT1|PPARG|SREBF2|SYK|ADAM17|TGFB1|TLR4	-6.8	MyList
GO Biological Processes	19	GO:0035272	exocrine system development	19_GO:0032502 developmental process	-8.2	27	13	30284	45	172	7	4.1	1.5	655|1956|2255|2260|2263|7040|7124	BMP7|EGFR|FGF10|FGFR1|FGFR2|TGFB1|TNF	-6.8	MyList
GO Biological Processes	19	GO:0008625	extrinsic apoptotic signaling pathway via death domain receptors	19_GO:0050896 response to stimulus	-8.2	27	13	30284	45	172	7	4.1	1.5	355|581|596|841|5295|5894|7124	FAS|BAX|BCL2|CASP8|PIK3R1|RAF1|TNF	-6.8	MyList
GO Biological Processes	19	GO:0002446	neutrophil mediated immunity	19_GO:0002376 immune system process	-8.2	41	15	30284	26	172	6	3.5	1.4	1511|1991|2147|3569|6868|54210	CTSG|ELANE|F2|IL6|ADAM17|TREM1	-6.8	MyList
GO Biological Processes	19	GO:0045621	positive regulation of lymphocyte differentiation	19_GO:0002376 immune system process	-8.2	13	11	30284	137	172	10	5.8	1.8	2309|3458|3558|3586|3606|4323|6850|7040|7048|114548	FOXO3|IFNG|IL2|IL10|IL18|MMP14|SYK|TGFB1|TGFBR2|NLRP3	-6.8	MyList
GO Biological Processes	19	GO:1900046	regulation of hemostasis	19_GO:0050789 regulation of biological process	-8.1	20	12	30284	71	172	8	4.7	1.6	857|1906|2147|2191|4780|4846|5327|5328	CAV1|EDN1|F2|FAP|NFE2L2|NOS3|PLAT|PLAU	-6.8	MyList
GO Biological Processes	19	GO:0006801	superoxide metabolic process	19_GO:0009987 cellular process	-8.1	27	13	30284	46	172	7	4.1	1.5	875|1906|4353|4843|4846|6647|6648	CBS|EDN1|MPO|NOS2|NOS3|SOD1|SOD2	-6.8	MyList
GO Biological Processes	19	GO:0030850	prostate gland development	19_GO:0022414 reproductive process	-8.1	27	13	30284	46	172	7	4.1	1.5	367|1499|1588|2099|2255|2263|4313	AR|CTNNB1|CYP19A1|ESR1|FGF10|FGFR2|MMP2	-6.8	MyList
GO Biological Processes	19	GO:0050866	negative regulation of cell activation	19_GO:0048519 negative regulation of biological process	-8.1	9.3	9.5	30284	227	172	12	7	1.9	836|1511|2064|2147|3558|3586|3958|4846|5320|5781|7040|10062	CASP3|CTSG|ERBB2|F2|IL2|IL10|LGALS3|NOS3|PLA2G2A|PTPN11|TGFB1|NR1H3	-6.8	MyList
GO Biological Processes	19	GO:0042698	ovulation cycle	19_GO:0048511 rhythmic process	-8.1	20	12	30284	72	172	8	4.7	1.6	836|1956|2099|2309|3480|4313|4846|5241	CASP3|EGFR|ESR1|FOXO3|IGF1R|MMP2|NOS3|PGR	-6.7	MyList
GO Biological Processes	19	GO:0045786	negative regulation of cell cycle	19_GO:0048519 negative regulation of biological process	-8.1	6.7	8.6	30284	392	172	15	8.7	2.2	595|596|655|836|1026|1432|1499|1956|3586|5728|5743|5781|7040|7124|7157	CCND1|BCL2|BMP7|CASP3|CDKN1A|MAPK14|CTNNB1|EGFR|IL10|PTEN|PTGS2|PTPN11|TGFB1|TNF|TP53	-6.7	MyList
GO Biological Processes	19	GO:0033559	unsaturated fatty acid metabolic process	19_GO:0009987 cellular process	-8.1	15	11	30284	104	172	9	5.2	1.7	240|1559|1645|1646|1906|2950|4282|5742|5743	ALOX5|CYP2C9|AKR1C1|AKR1C2|EDN1|GSTP1|MIF|PTGS1|PTGS2	-6.7	MyList
GO Biological Processes	19	GO:0071548	response to dexamethasone	19_GO:0050896 response to stimulus	-8.1	26	13	30284	47	172	7	4.1	1.5	1906|1956|2309|2908|3480|5290|7040	EDN1|EGFR|FOXO3|NR3C1|IGF1R|PIK3CA|TGFB1	-6.7	MyList
GO Biological Processes	19	GO:0035987	endodermal cell differentiation	19_GO:0032502 developmental process	-8.1	26	13	30284	47	172	7	4.1	1.5	1499|3685|4313|4317|4318|4323|5604	CTNNB1|ITGAV|MMP2|MMP8|MMP9|MMP14|MAP2K1	-6.7	MyList
GO Biological Processes	19	GO:0097696	cell surface receptor signaling pathway via STAT	19_GO:0050896 response to stimulus	-8	19	12	30284	73	172	8	4.7	1.6	3458|3479|3558|3569|6352|6772|6774|7124	IFNG|IGF1|IL2|IL6|CCL5|STAT1|STAT3|TNF	-6.7	MyList
GO Biological Processes	19	GO:0014015	positive regulation of gliogenesis	19_GO:0032502 developmental process	-8	19	12	30284	73	172	8	4.7	1.6	1956|2475|3553|3569|5970|7040|7124|407006	EGFR|MTOR|IL1B|IL6|RELA|TGFB1|TNF|MIR221	-6.7	MyList
GO Biological Processes	19	GO:0008593	regulation of Notch signaling pathway	19_GO:0050896 response to stimulus	-8	15	11	30284	105	172	9	5.2	1.7	207|655|2255|3815|4323|4792|4846|6721|6774	AKT1|BMP7|FGF10|KIT|MMP14|NFKBIA|NOS3|SREBF2|STAT3	-6.7	MyList
GO Biological Processes	19	GO:0060070	canonical Wnt signaling pathway	19_GO:0050896 response to stimulus	-8	15	11	30284	105	172	9	5.2	1.7	857|1499|1906|2247|2308|2309|2932|5728|7040	CAV1|CTNNB1|EDN1|FGF2|FOXO1|FOXO3|GSK3B|PTEN|TGFB1	-6.7	MyList
GO Biological Processes	19	GO:0090596	sensory organ morphogenesis	19_GO:0032502 developmental process	-8	8.1	9.1	30284	283	172	13	7.6	2	581|596|655|1499|1906|2255|2260|2263|3091|5594|6647|6774|7422	BAX|BCL2|BMP7|CTNNB1|EDN1|FGF10|FGFR1|FGFR2|HIF1A|MAPK1|SOD1|STAT3|VEGFA	-6.7	MyList
GO Biological Processes	19	GO:0008544	epidermis development	19_GO:0032502 developmental process	-8	7.3	8.8	30284	339	172	14	8.1	2.1	596|836|1026|1499|1956|2247|2255|2260|2263|3606|4233|5604|5970|6647	BCL2|CASP3|CDKN1A|CTNNB1|EGFR|FGF2|FGF10|FGFR1|FGFR2|IL18|MET|MAP2K1|RELA|SOD1	-6.6	MyList
GO Biological Processes	19	GO:0072073	kidney epithelium development	19_GO:0032502 developmental process	-8	12	10	30284	143	172	10	5.8	1.8	596|655|847|1499|1906|2247|2260|2263|5175|7040	BCL2|BMP7|CAT|CTNNB1|EDN1|FGF2|FGFR1|FGFR2|PECAM1|TGFB1	-6.6	MyList
GO Biological Processes	19	GO:0045058	T cell selection	19_GO:0002376 immune system process	-8	26	13	30284	48	172	7	4.1	1.5	596|673|920|2475|3569|6774|6850	BCL2|BRAF|CD4|MTOR|IL6|STAT3|SYK	-6.6	MyList
GO Biological Processes	19	GO:0010634	positive regulation of epithelial cell migration	19_GO:0040011 locomotion	-8	26	13	30284	48	172	7	4.1	1.5	2255|2475|3091|3458|4318|7048|407006	FGF10|MTOR|HIF1A|IFNG|MMP9|TGFBR2|MIR221	-6.6	MyList
GO Biological Processes	19	GO:0048806	genitalia development	19_GO:0022414 reproductive process	-8	26	13	30284	48	172	7	4.1	1.5	367|581|1499|1588|2099|2255|5781	AR|BAX|CTNNB1|CYP19A1|ESR1|FGF10|PTPN11	-6.6	MyList
GO Biological Processes	19	GO:0002673	regulation of acute inflammatory response	19_GO:0050896 response to stimulus	-8	26	13	30284	48	172	7	4.1	1.5	2950|3553|3569|5294|5743|7124|114548	GSTP1|IL1B|IL6|PIK3CG|PTGS2|TNF|NLRP3	-6.6	MyList
GO Biological Processes	19	GO:0051043	regulation of membrane protein ectodomain proteolysis	19_GO:0050789 regulation of biological process	-8	38	15	30284	28	172	6	3.5	1.4	3458|3553|3586|7076|7077|7124	IFNG|IL1B|IL10|TIMP1|TIMP2|TNF	-6.6	MyList
GO Biological Processes	19	GO:0002360	T cell lineage commitment	19_GO:0002376 immune system process	-8	38	15	30284	28	172	6	3.5	1.4	596|673|2475|3569|6774|7157	BCL2|BRAF|MTOR|IL6|STAT3|TP53	-6.6	MyList
GO Biological Processes	19	GO:0044283	small molecule biosynthetic process	19_GO:0009987 cellular process	-7.9	6	8.3	30284	466	172	16	9.3	2.2	240|834|875|1559|1588|1906|2821|2950|3156|4282|4353|5009|5742|5743|6850|7167	ALOX5|CASP1|CBS|CYP2C9|CYP19A1|EDN1|GPI|GSTP1|HMGCR|MIF|MPO|OTC|PTGS1|PTGS2|SYK|TPI1	-6.6	MyList
GO Biological Processes	19	GO:0001654	eye development	19_GO:0032502 developmental process	-7.9	6.6	8.5	30284	403	172	15	8.7	2.2	581|596|655|1499|1956|2255|2321|2353|3091|6774|7040|7046|7048|7422|7431	BAX|BCL2|BMP7|CTNNB1|EGFR|FGF10|FLT1|FOS|HIF1A|STAT3|TGFB1|TGFBR1|TGFBR2|VEGFA|VIM	-6.6	MyList
GO Biological Processes	19	GO:1904894	positive regulation of receptor signaling pathway via STAT	19_GO:0048518 positive regulation of biological process	-7.9	25	13	30284	49	172	7	4.1	1.5	2147|3569|3586|3815|6352|7040|407006	F2|IL6|IL10|KIT|CCL5|TGFB1|MIR221	-6.6	MyList
GO Biological Processes	19	GO:0046887	positive regulation of hormone secretion	19_GO:0051179 localization	-7.9	12	10	30284	146	172	10	5.8	1.8	1385|1588|1906|1956|2147|2260|3091|5468|5578|5781	CREB1|CYP19A1|EDN1|EGFR|F2|FGFR1|HIF1A|PPARG|PRKCA|PTPN11	-6.6	MyList
GO Biological Processes	19	GO:0007596	blood coagulation	19_GO:0032501 multicellular organismal process	-7.9	10	9.6	30284	189	172	11	6.4	1.9	308|1432|1511|2147|3569|5265|5290|5294|5327|5328|6850	ANXA5|MAPK14|CTSG|F2|IL6|SERPINA1|PIK3CA|PIK3CG|PLAT|PLAU|SYK	-6.6	MyList
GO Biological Processes	19	GO:1901615	organic hydroxy compound metabolic process	19_GO:0009987 cellular process	-7.9	6	8.3	30284	468	172	16	9.3	2.2	596|847|1508|1513|1559|1588|1645|1646|2260|2638|3091|3156|3479|6721|7157|7167	BCL2|CAT|CTSB|CTSK|CYP2C9|CYP19A1|AKR1C1|AKR1C2|FGFR1|GC|HIF1A|HMGCR|IGF1|SREBF2|TP53|TPI1	-6.6	MyList
GO Biological Processes	19	GO:0007589	body fluid secretion	19_GO:0051179 localization	-7.9	19	12	30284	76	172	8	4.7	1.6	595|857|1385|1906|2255|3091|7422|7498	CCND1|CAV1|CREB1|EDN1|FGF10|HIF1A|VEGFA|XDH	-6.6	MyList
GO Biological Processes	19	GO:0008630	intrinsic apoptotic signaling pathway in response to DNA damage	19_GO:0050896 response to stimulus	-7.9	19	12	30284	76	172	8	4.7	1.6	581|596|1026|5295|6648|7124|7157|27113	BAX|BCL2|CDKN1A|PIK3R1|SOD2|TNF|TP53|BBC3	-6.6	MyList
GO Biological Processes	19	GO:0006970	response to osmotic stress	19_GO:0050896 response to stimulus	-7.9	19	12	30284	76	172	8	4.7	1.6	581|834|836|2475|5743|7124|7157|114548	BAX|CASP1|CASP3|MTOR|PTGS2|TNF|TP53|NLRP3	-6.6	MyList
GO Biological Processes	19	GO:0048469	cell maturation	19_GO:0032502 developmental process	-7.9	10	9.6	30284	190	172	11	6.4	1.9	596|1026|1499|1906|2260|2309|3091|5241|5468|7040|7422	BCL2|CDKN1A|CTNNB1|EDN1|FGFR1|FOXO3|HIF1A|PGR|PPARG|TGFB1|VEGFA	-6.5	MyList
GO Biological Processes	19	GO:0003156	regulation of animal organ formation	19_GO:0032502 developmental process	-7.9	36	14	30284	29	172	6	3.5	1.4	367|655|1499|2247|2255|2260	AR|BMP7|CTNNB1|FGF2|FGF10|FGFR1	-6.5	MyList
GO Biological Processes	19	GO:0150063	visual system development	19_GO:0032502 developmental process	-7.9	6.5	8.4	30284	407	172	15	8.7	2.2	581|596|655|1499|1956|2255|2321|2353|3091|6774|7040|7046|7048|7422|7431	BAX|BCL2|BMP7|CTNNB1|EGFR|FGF10|FLT1|FOS|HIF1A|STAT3|TGFB1|TGFBR1|TGFBR2|VEGFA|VIM	-6.5	MyList
GO Biological Processes	19	GO:0032369	negative regulation of lipid transport	19_GO:0051179 localization	-7.9	25	13	30284	50	172	7	4.1	1.5	207|1950|3685|4790|5781|6721|10062	AKT1|EGF|ITGAV|NFKB1|PTPN11|SREBF2|NR1H3	-6.5	MyList
GO Biological Processes	19	GO:0007178	cell surface receptor protein serine/threonine kinase signaling pathway	19_GO:0050896 response to stimulus	-7.9	10	9.6	30284	191	172	11	6.4	1.9	142|655|1432|2353|3725|5468|6774|7040|7046|7048|7157	PARP1|BMP7|MAPK14|FOS|JUN|PPARG|STAT3|TGFB1|TGFBR1|TGFBR2|TP53	-6.5	MyList
GO Biological Processes	19	GO:0050817	coagulation	19_GO:0032501 multicellular organismal process	-7.9	10	9.6	30284	191	172	11	6.4	1.9	308|1432|1511|2147|3569|5265|5290|5294|5327|5328|6850	ANXA5|MAPK14|CTSG|F2|IL6|SERPINA1|PIK3CA|PIK3CG|PLAT|PLAU|SYK	-6.5	MyList
GO Biological Processes	19	GO:0030111	regulation of Wnt signaling pathway	19_GO:0050896 response to stimulus	-7.8	7	8.6	30284	350	172	14	8.1	2.1	857|1000|1432|1499|1950|1956|2247|2255|2263|2308|2309|2932|4790|7040	CAV1|CDH2|MAPK14|CTNNB1|EGF|EGFR|FGF2|FGF10|FGFR2|FOXO1|FOXO3|GSK3B|NFKB1|TGFB1	-6.5	MyList
GO Biological Processes	19	GO:0010573	vascular endothelial growth factor production	19_GO:0032501 multicellular organismal process	-7.8	120	22	30284	6	172	4	2.3	1.1	3091|3553|3569|7124	HIF1A|IL1B|IL6|TNF	-6.5	MyList
GO Biological Processes	19	GO:0043542	endothelial cell migration	19_GO:0009987 cellular process	-7.8	18	11	30284	78	172	8	4.7	1.6	207|1803|2191|2247|4846|5290|7046|7422	AKT1|DPP4|FAP|FGF2|NOS3|PIK3CA|TGFBR1|VEGFA	-6.5	MyList
GO Biological Processes	19	GO:0014074	response to purine-containing compound	19_GO:0050896 response to stimulus	-7.8	12	10	30284	150	172	10	5.8	1.8	196|673|1385|2353|3553|5294|5743|5970|6772|8061	AHR|BRAF|CREB1|FOS|IL1B|PIK3CG|PTGS2|RELA|STAT1|FOSL1	-6.5	MyList
GO Biological Processes	19	GO:0097396	response to interleukin-17	19_GO:0050896 response to stimulus	-7.8	59	17	30284	15	172	5	2.9	1.3	3553|3627|4790|6774|7189	IL1B|CXCL10|NFKB1|STAT3|TRAF6	-6.5	MyList
GO Biological Processes	19	GO:0097398	cellular response to interleukin-17	19_GO:0050896 response to stimulus	-7.8	59	17	30284	15	172	5	2.9	1.3	3553|3627|4790|6774|7189	IL1B|CXCL10|NFKB1|STAT3|TRAF6	-6.5	MyList
GO Biological Processes	19	GO:0097421	liver regeneration	19_GO:0032502 developmental process	-7.8	35	14	30284	30	172	6	3.5	1.4	595|1956|3569|3586|7040|7124	CCND1|EGFR|IL6|IL10|TGFB1|TNF	-6.5	MyList
GO Biological Processes	19	GO:0019218	regulation of steroid metabolic process	19_GO:0050789 regulation of biological process	-7.8	14	11	30284	112	172	9	5.2	1.7	1385|2908|3458|3480|3815|4790|5594|6721|7124	CREB1|NR3C1|IFNG|IGF1R|KIT|NFKB1|MAPK1|SREBF2|TNF	-6.4	MyList
GO Biological Processes	19	GO:0048880	sensory system development	19_GO:0032502 developmental process	-7.8	6.4	8.3	30284	414	172	15	8.7	2.2	581|596|655|1499|1956|2255|2321|2353|3091|6774|7040|7046|7048|7422|7431	BAX|BCL2|BMP7|CTNNB1|EGFR|FGF10|FLT1|FOS|HIF1A|STAT3|TGFB1|TGFBR1|TGFBR2|VEGFA|VIM	-6.4	MyList
GO Biological Processes	19	GO:0001937	negative regulation of endothelial cell proliferation	19_GO:0048519 negative regulation of biological process	-7.8	18	11	30284	79	172	8	4.7	1.6	240|857|2321|5468|6772|7046|7124|7498	ALOX5|CAV1|FLT1|PPARG|STAT1|TGFBR1|TNF|XDH	-6.4	MyList
GO Biological Processes	19	GO:0007254	JNK cascade	19_GO:0050896 response to stimulus	-7.8	18	11	30284	79	172	8	4.7	1.6	1432|3553|4790|5594|5599|5604|7099|7124	MAPK14|IL1B|NFKB1|MAPK1|MAPK8|MAP2K1|TLR4|TNF	-6.4	MyList
GO Biological Processes	19	GO:0043010	camera-type eye development	19_GO:0032502 developmental process	-7.7	6.9	8.5	30284	355	172	14	8.1	2.1	581|655|1499|1956|2255|2321|2353|3091|6774|7040|7046|7048|7422|7431	BAX|BMP7|CTNNB1|EGFR|FGF10|FLT1|FOS|HIF1A|STAT3|TGFB1|TGFBR1|TGFBR2|VEGFA|VIM	-6.4	MyList
GO Biological Processes	19	GO:0051155	positive regulation of striated muscle cell differentiation	19_GO:0032502 developmental process	-7.7	24	12	30284	52	172	7	4.1	1.5	596|1432|1906|2475|3479|4323|7040	BCL2|MAPK14|EDN1|MTOR|IGF1|MMP14|TGFB1	-6.4	MyList
GO Biological Processes	19	GO:1905562	regulation of vascular endothelial cell proliferation	19_GO:0050789 regulation of biological process	-7.7	24	12	30284	52	172	7	4.1	1.5	2247|2260|2321|5468|6667|6774|6868	FGF2|FGFR1|FLT1|PPARG|SP1|STAT3|ADAM17	-6.4	MyList
GO Biological Processes	19	GO:0002443	leukocyte mediated immunity	19_GO:0002376 immune system process	-7.7	7.7	8.7	30284	299	172	13	7.6	2	715|716|1511|1991|2147|3569|3606|3815|5294|5295|6850|6868|54210	C1R|C1S|CTSG|ELANE|F2|IL6|IL18|KIT|PIK3CG|PIK3R1|SYK|ADAM17|TREM1	-6.4	MyList
GO Biological Processes	19	GO:0010469	regulation of signaling receptor activity	19_GO:0050896 response to stimulus	-7.7	18	11	30284	80	172	8	4.7	1.6	1906|3091|3458|3586|5328|5468|6868|7124	EDN1|HIF1A|IFNG|IL10|PLAU|PPARG|ADAM17|TNF	-6.4	MyList
GO Biological Processes	19	GO:0002064	epithelial cell development	19_GO:0032502 developmental process	-7.7	9.8	9.4	30284	197	172	11	6.4	1.9	367|1000|1026|2099|3091|4233|5175|5241|7040|7422|7431	AR|CDH2|CDKN1A|ESR1|HIF1A|MET|PECAM1|PGR|TGFB1|VEGFA|VIM	-6.4	MyList
GO Biological Processes	19	GO:0098609	cell-cell adhesion	19_GO:0009987 cellular process	-7.7	5.4	7.9	30284	551	172	17	9.9	2.3	596|655|1000|1499|1956|3553|3685|3815|5175|5294|6352|6403|6850|7048|7124|7412|7422	BCL2|BMP7|CDH2|CTNNB1|EGFR|IL1B|ITGAV|KIT|PECAM1|PIK3CG|CCL5|SELP|SYK|TGFBR2|TNF|VCAM1|VEGFA	-6.4	MyList
GO Biological Processes	19	GO:0046651	lymphocyte proliferation	19_GO:0002376 immune system process	-7.7	14	10	30284	114	172	9	5.2	1.7	581|596|2064|3558|3586|5294|7040|7099|7157	BAX|BCL2|ERBB2|IL2|IL10|PIK3CG|TGFB1|TLR4|TP53	-6.4	MyList
GO Biological Processes	19	GO:0070231	T cell apoptotic process	19_GO:0009987 cellular process	-7.7	34	14	30284	31	172	6	3.5	1.4	207|355|581|596|7157|27113	AKT1|FAS|BAX|BCL2|TP53|BBC3	-6.4	MyList
GO Biological Processes	19	GO:0046209	nitric oxide metabolic process	19_GO:0009987 cellular process	-7.7	34	14	30284	31	172	6	3.5	1.4	207|857|4843|4846|5447|7099	AKT1|CAV1|NOS2|NOS3|POR|TLR4	-6.4	MyList
GO Biological Processes	19	GO:1903036	positive regulation of response to wounding	19_GO:0048518 positive regulation of biological process	-7.7	17	11	30284	81	172	8	4.7	1.6	673|2147|2475|3480|4780|5327|5328|407006	BRAF|F2|MTOR|IGF1R|NFE2L2|PLAT|PLAU|MIR221	-6.4	MyList
GO Biological Processes	19	GO:0060324	face development	19_GO:0032502 developmental process	-7.7	23	12	30284	53	172	7	4.1	1.5	673|4313|5594|5604|5781|5894|7040	BRAF|MMP2|MAPK1|MAP2K1|PTPN11|RAF1|TGFB1	-6.4	MyList
GO Biological Processes	19	GO:1904375	regulation of protein localization to cell periphery	19_GO:0051179 localization	-7.7	11	9.8	30284	155	172	10	5.8	1.8	207|367|1956|3458|3958|4323|5295|7040|7124|7189	AKT1|AR|EGFR|IFNG|LGALS3|MMP14|PIK3R1|TGFB1|TNF|TRAF6	-6.3	MyList
GO Biological Processes	19	GO:0002705	positive regulation of leukocyte mediated immunity	19_GO:0002376 immune system process	-7.7	11	9.8	30284	155	172	10	5.8	1.8	3553|3558|3569|3606|3815|4843|7040|7124|7189|114548	IL1B|IL2|IL6|IL18|KIT|NOS2|TGFB1|TNF|TRAF6|NLRP3	-6.3	MyList
GO Biological Processes	19	GO:0046622	positive regulation of organ growth	19_GO:0040007 growth	-7.6	23	12	30284	54	172	7	4.1	1.5	207|1432|1906|2247|2260|2263|3479	AKT1|MAPK14|EDN1|FGF2|FGFR1|FGFR2|IGF1	-6.3	MyList
GO Biological Processes	19	GO:0048146	positive regulation of fibroblast proliferation	19_GO:0048518 positive regulation of biological process	-7.6	23	12	30284	54	172	7	4.1	1.5	1026|1956|2099|2255|3479|4282|7040	CDKN1A|EGFR|ESR1|FGF10|IGF1|MIF|TGFB1	-6.3	MyList
GO Biological Processes	19	GO:0010821	regulation of mitochondrion organization	19_GO:0050789 regulation of biological process	-7.6	14	10	30284	117	172	9	5.2	1.7	207|581|2932|3479|4137|4318|5468|7157|27113	AKT1|BAX|GSK3B|IGF1|MAPT|MMP9|PPARG|TP53|BBC3	-6.3	MyList
GO Biological Processes	19	GO:0034250	positive regulation of amide metabolic process	19_GO:0048518 positive regulation of biological process	-7.6	33	14	30284	32	172	6	3.5	1.4	836|3458|4780|5970|6667|7124	CASP3|IFNG|NFE2L2|RELA|SP1|TNF	-6.3	MyList
GO Biological Processes	19	GO:0007492	endoderm development	19_GO:0032502 developmental process	-7.6	17	11	30284	83	172	8	4.7	1.6	1499|3685|4313|4317|4318|4323|5604|7040	CTNNB1|ITGAV|MMP2|MMP8|MMP9|MMP14|MAP2K1|TGFB1	-6.3	MyList
GO Biological Processes	19	GO:0009746	response to hexose	19_GO:0050896 response to stimulus	-7.6	11	9.7	30284	158	172	10	5.8	1.8	836|2309|3091|3480|5290|5743|5894|7040|7124|407006	CASP3|FOXO3|HIF1A|IGF1R|PIK3CA|PTGS2|RAF1|TGFB1|TNF|MIR221	-6.3	MyList
GO Biological Processes	19	GO:0032943	mononuclear cell proliferation	19_GO:0009987 cellular process	-7.6	13	10	30284	118	172	9	5.2	1.7	581|596|2064|3558|3586|5294|7040|7099|7157	BAX|BCL2|ERBB2|IL2|IL10|PIK3CG|TGFB1|TLR4|TP53	-6.3	MyList
GO Biological Processes	19	GO:1903076	regulation of protein localization to plasma membrane	19_GO:0051179 localization	-7.6	13	10	30284	118	172	9	5.2	1.7	207|367|1956|3458|3958|4323|5295|7040|7124	AKT1|AR|EGFR|IFNG|LGALS3|MMP14|PIK3R1|TGFB1|TNF	-6.3	MyList
GO Biological Processes	19	GO:0010332	response to gamma radiation	19_GO:0050896 response to stimulus	-7.6	22	12	30284	55	172	7	4.1	1.5	142|581|596|1026|3627|6648|7157	PARP1|BAX|BCL2|CDKN1A|CXCL10|SOD2|TP53	-6.2	MyList
GO Biological Processes	19	GO:0050851	antigen receptor-mediated signaling pathway	19_GO:0002376 immune system process	-7.6	11	9.6	30284	159	172	10	5.8	1.8	581|596|673|3551|4790|4792|5290|5594|6850|7189	BAX|BCL2|BRAF|IKBKB|NFKB1|NFKBIA|PIK3CA|MAPK1|SYK|TRAF6	-6.2	MyList
GO Biological Processes	19	GO:2000241	regulation of reproductive process	19_GO:0022414 reproductive process	-7.5	9.4	9.2	30284	205	172	11	6.4	1.9	367|581|655|1499|2099|3479|3815|5327|6647|7076|7422	AR|BAX|BMP7|CTNNB1|ESR1|IGF1|KIT|PLAT|SOD1|TIMP1|VEGFA	-6.2	MyList
GO Biological Processes	19	GO:0045648	positive regulation of erythrocyte differentiation	19_GO:0042592 homeostatic process	-7.5	32	13	30284	33	172	6	3.5	1.4	1432|2309|3091|6772|6774|407006	MAPK14|FOXO3|HIF1A|STAT1|STAT3|MIR221	-6.2	MyList
GO Biological Processes	19	GO:2001057	reactive nitrogen species metabolic process	19_GO:0009987 cellular process	-7.5	32	13	30284	33	172	6	3.5	1.4	207|857|4843|4846|5447|7099	AKT1|CAV1|NOS2|NOS3|POR|TLR4	-6.2	MyList
GO Biological Processes	19	GO:1904385	cellular response to angiotensin	19_GO:0050896 response to stimulus	-7.5	32	13	30284	33	172	6	3.5	1.4	760|857|3480|4780|4790|5970	CA2|CAV1|IGF1R|NFE2L2|NFKB1|RELA	-6.2	MyList
GO Biological Processes	19	GO:0051092	positive regulation of NF-kappaB transcription factor activity	19_GO:0050789 regulation of biological process	-7.5	13	10	30284	120	172	9	5.2	1.7	367|3551|3553|3606|5970|7099|7124|7189|114548	AR|IKBKB|IL1B|IL18|RELA|TLR4|TNF|TRAF6|NLRP3	-6.2	MyList
GO Biological Processes	19	GO:0008202	steroid metabolic process	19_GO:0009987 cellular process	-7.5	8.2	8.8	30284	257	172	12	7	1.9	847|1559|1588|1645|1646|2099|2260|2638|2908|3156|3290|6721	CAT|CYP2C9|CYP19A1|AKR1C1|AKR1C2|ESR1|FGFR1|GC|NR3C1|HMGCR|HSD11B1|SREBF2	-6.2	MyList
GO Biological Processes	19	GO:0002246	wound healing involved in inflammatory response	19_GO:0050896 response to stimulus	-7.5	100	20	30284	7	172	4	2.3	1.1	3091|7040|7076|7099	HIF1A|TGFB1|TIMP1|TLR4	-6.1	MyList
GO Biological Processes	19	GO:0060440	trachea formation	19_GO:0032502 developmental process	-7.5	100	20	30284	7	172	4	2.3	1.1	1499|5594|5604|7048	CTNNB1|MAPK1|MAP2K1|TGFBR2	-6.1	MyList
GO Biological Processes	19	GO:0060558	regulation of calcidiol 1-monooxygenase activity	19_GO:0065007 biological regulation	-7.5	100	20	30284	7	172	4	2.3	1.1	3458|3553|4790|7124	IFNG|IL1B|NFKB1|TNF	-6.1	MyList
GO Biological Processes	19	GO:0001706	endoderm formation	19_GO:0032502 developmental process	-7.5	22	12	30284	57	172	7	4.1	1.5	1499|3685|4313|4317|4318|4323|5604	CTNNB1|ITGAV|MMP2|MMP8|MMP9|MMP14|MAP2K1	-6.1	MyList
GO Biological Processes	19	GO:0007405	neuroblast proliferation	19_GO:0032502 developmental process	-7.5	22	12	30284	57	172	7	4.1	1.5	1499|2247|2260|2263|3091|7157|7422	CTNNB1|FGF2|FGFR1|FGFR2|HIF1A|TP53|VEGFA	-6.1	MyList
GO Biological Processes	19	GO:0043270	positive regulation of monoatomic ion transport	19_GO:0051179 localization	-7.4	9.2	9	30284	210	172	11	6.4	1.9	207|581|857|1520|1906|2147|3458|3627|3958|6352|6387	AKT1|BAX|CAV1|CTSS|EDN1|F2|IFNG|CXCL10|LGALS3|CCL5|CXCL12	-6.1	MyList
GO Biological Processes	19	GO:0045913	positive regulation of carbohydrate metabolic process	19_GO:0048518 positive regulation of biological process	-7.4	16	11	30284	87	172	8	4.7	1.6	207|1950|2308|2475|3091|3458|3479|4790	AKT1|EGF|FOXO1|MTOR|HIF1A|IFNG|IGF1|NFKB1	-6.1	MyList
GO Biological Processes	19	GO:1900542	regulation of purine nucleotide metabolic process	19_GO:0050789 regulation of biological process	-7.4	16	11	30284	87	172	8	4.7	1.6	142|2475|3091|3458|3479|4846|6774|7157	PARP1|MTOR|HIF1A|IFNG|IGF1|NOS3|STAT3|TP53	-6.1	MyList
GO Biological Processes	19	GO:0018108	peptidyl-tyrosine phosphorylation	19_GO:0009987 cellular process	-7.4	21	12	30284	58	172	7	4.1	1.5	1956|2064|2260|2263|2321|3480|6850	EGFR|ERBB2|FGFR1|FGFR2|FLT1|IGF1R|SYK	-6.1	MyList
GO Biological Processes	19	GO:0010656	negative regulation of muscle cell apoptotic process	19_GO:0048519 negative regulation of biological process	-7.4	21	12	30284	58	172	7	4.1	1.5	655|1786|1906|2099|3479|3480|4780	BMP7|DNMT1|EDN1|ESR1|IGF1|IGF1R|NFE2L2	-6.1	MyList
GO Biological Processes	19	GO:0050810	regulation of steroid biosynthetic process	19_GO:0050789 regulation of biological process	-7.4	16	11	30284	88	172	8	4.7	1.6	1385|2908|3458|3480|4790|5594|6721|7124	CREB1|NR3C1|IFNG|IGF1R|NFKB1|MAPK1|SREBF2|TNF	-6.1	MyList
GO Biological Processes	19	GO:0006140	regulation of nucleotide metabolic process	19_GO:0050789 regulation of biological process	-7.4	16	11	30284	88	172	8	4.7	1.6	142|2475|3091|3458|3479|4846|6774|7157	PARP1|MTOR|HIF1A|IFNG|IGF1|NOS3|STAT3|TP53	-6.1	MyList
GO Biological Processes	19	GO:0001657	ureteric bud development	19_GO:0032502 developmental process	-7.4	16	11	30284	88	172	8	4.7	1.6	596|655|847|1499|2247|2260|2263|7040	BCL2|BMP7|CAT|CTNNB1|FGF2|FGFR1|FGFR2|TGFB1	-6.1	MyList
GO Biological Processes	19	GO:0032370	positive regulation of lipid transport	19_GO:0051179 localization	-7.4	16	11	30284	88	172	8	4.7	1.6	857|1588|1906|3553|4282|4792|5468|10062	CAV1|CYP19A1|EDN1|IL1B|MIF|NFKBIA|PPARG|NR1H3	-6.1	MyList
GO Biological Processes	19	GO:0003007	heart morphogenesis	19_GO:0032502 developmental process	-7.4	8	8.6	30284	265	172	12	7	1.9	655|1499|1906|2263|2475|3091|4846|7040|7046|7048|7157|7422	BMP7|CTNNB1|EDN1|FGFR2|MTOR|HIF1A|NOS3|TGFB1|TGFBR1|TGFBR2|TP53|VEGFA	-6.1	MyList
GO Biological Processes	19	GO:0110110	positive regulation of animal organ morphogenesis	19_GO:0032502 developmental process	-7.4	30	13	30284	35	172	6	3.5	1.4	1499|1906|2247|2255|2260|7040	CTNNB1|EDN1|FGF2|FGF10|FGFR1|TGFB1	-6.1	MyList
GO Biological Processes	19	GO:0072164	mesonephric tubule development	19_GO:0032502 developmental process	-7.4	16	11	30284	89	172	8	4.7	1.6	596|655|847|1499|2247|2260|2263|7040	BCL2|BMP7|CAT|CTNNB1|FGF2|FGFR1|FGFR2|TGFB1	-6.1	MyList
GO Biological Processes	19	GO:0072163	mesonephric epithelium development	19_GO:0032502 developmental process	-7.4	16	11	30284	89	172	8	4.7	1.6	596|655|847|1499|2247|2260|2263|7040	BCL2|BMP7|CAT|CTNNB1|FGF2|FGFR1|FGFR2|TGFB1	-6.1	MyList
GO Biological Processes	19	GO:0007292	female gamete generation	19_GO:0022414 reproductive process	-7.4	11	9.3	30284	167	172	10	5.8	1.8	207|596|1499|1906|2309|4313|4846|5241|5728|8061	AKT1|BCL2|CTNNB1|EDN1|FOXO3|MMP2|NOS3|PGR|PTEN|FOSL1	-6.1	MyList
GO Biological Processes	19	GO:0050777	negative regulation of immune response	19_GO:0002376 immune system process	-7.4	9.1	8.9	30284	214	172	11	6.4	1.9	142|196|1432|3558|3586|3958|4321|5468|6850|7040|10062	PARP1|AHR|MAPK14|IL2|IL10|LGALS3|MMP12|PPARG|SYK|TGFB1|NR1H3	-6.1	MyList
GO Biological Processes	19	GO:0018212	peptidyl-tyrosine modification	19_GO:0009987 cellular process	-7.3	21	12	30284	59	172	7	4.1	1.5	1956|2064|2260|2263|2321|3480|6850	EGFR|ERBB2|FGFR1|FGFR2|FLT1|IGF1R|SYK	-6	MyList
GO Biological Processes	19	GO:0038093	Fc receptor signaling pathway	19_GO:0002376 immune system process	-7.3	21	12	30284	59	172	7	4.1	1.5	3458|3551|3815|4843|5599|6850|7189	IFNG|IKBKB|KIT|NOS2|MAPK8|SYK|TRAF6	-6	MyList
GO Biological Processes	19	GO:0070230	positive regulation of lymphocyte apoptotic process	19_GO:0048518 positive regulation of biological process	-7.3	49	15	30284	18	172	5	2.9	1.3	581|3586|6352|7157|27113	BAX|IL10|CCL5|TP53|BBC3	-6	MyList
GO Biological Processes	19	GO:0150078	positive regulation of neuroinflammatory response	19_GO:0048518 positive regulation of biological process	-7.3	49	15	30284	18	172	5	2.9	1.3	3553|3569|3606|4317|7124	IL1B|IL6|IL18|MMP8|TNF	-6	MyList
GO Biological Processes	19	GO:0010975	regulation of neuron projection development	19_GO:0032502 developmental process	-7.3	5.9	7.9	30284	448	172	15	8.7	2.2	207|627|655|673|2260|2932|3480|4137|4780|5604|5728|6387|7422|7431|407006	AKT1|BDNF|BMP7|BRAF|FGFR1|GSK3B|IGF1R|MAPT|NFE2L2|MAP2K1|PTEN|CXCL12|VEGFA|VIM|MIR221	-6	MyList
GO Biological Processes	19	GO:0141193	nuclear receptor-mediated signaling pathway	19_GO:0050896 response to stimulus	-7.3	16	11	30284	90	172	8	4.7	1.6	367|2099|2100|2908|5241|5468|5594|7067	AR|ESR1|ESR2|NR3C1|PGR|PPARG|MAPK1|THRA	-6	MyList
GO Biological Processes	19	GO:0046324	regulation of D-glucose import	19_GO:0051179 localization	-7.3	21	11	30284	60	172	7	4.1	1.5	207|1432|3479|4780|5295|5781|7124	AKT1|MAPK14|IGF1|NFE2L2|PIK3R1|PTPN11|TNF	-6	MyList
GO Biological Processes	19	GO:0061844	antimicrobial humoral immune response mediated by antimicrobial peptide	19_GO:0044419 biological process involved in interspecies interaction between organisms	-7.3	12	9.8	30284	128	172	9	5.2	1.7	1991|2147|3627|3958|4316|6352|6361|6367|6387	ELANE|F2|CXCL10|LGALS3|MMP7|CCL5|CCL17|CCL22|CXCL12	-6	MyList
GO Biological Processes	19	GO:0050801	monoatomic ion homeostasis	19_GO:0042592 homeostatic process	-7.3	5.4	7.7	30284	522	172	16	9.3	2.2	581|596|760|857|1906|1991|2147|2260|3091|5009|5594|6352|6387|6647|6648|7040	BAX|BCL2|CA2|CAV1|EDN1|ELANE|F2|FGFR1|HIF1A|OTC|MAPK1|CCL5|CXCL12|SOD1|SOD2|TGFB1	-6	MyList
GO Biological Processes	19	GO:0032787	monocarboxylic acid metabolic process	19_GO:0009987 cellular process	-7.2	5.4	7.6	30284	525	172	16	9.3	2.2	240|1432|1559|1645|1646|1906|2821|2950|3091|3479|4282|5468|5742|5743|7157|7167	ALOX5|MAPK14|CYP2C9|AKR1C1|AKR1C2|EDN1|GPI|GSTP1|HIF1A|IGF1|MIF|PPARG|PTGS1|PTGS2|TP53|TPI1	-5.9	MyList
GO Biological Processes	19	GO:0048143	astrocyte activation	19_GO:0032502 developmental process	-7.2	46	15	30284	19	172	5	2.9	1.3	1956|3458|3553|4137|7124	EGFR|IFNG|IL1B|MAPT|TNF	-5.9	MyList
GO Biological Processes	19	GO:0002824	positive regulation of adaptive immune response based on somatic recombination of immune receptors built from immunoglobulin superfamily domains	19_GO:0002376 immune system process	-7.2	12	9.7	30284	130	172	9	5.2	1.7	920|3553|3558|3569|3606|7040|7124|7189|114548	CD4|IL1B|IL2|IL6|IL18|TGFB1|TNF|TRAF6|NLRP3	-5.9	MyList
GO Biological Processes	19	GO:0046326	positive regulation of D-glucose import	19_GO:0051179 localization	-7.2	29	13	30284	37	172	6	3.5	1.4	207|1432|3479|4780|5295|5781	AKT1|MAPK14|IGF1|NFE2L2|PIK3R1|PTPN11	-5.9	MyList
GO Biological Processes	19	GO:0010574	regulation of vascular endothelial growth factor production	19_GO:0032501 multicellular organismal process	-7.2	20	11	30284	62	172	7	4.1	1.5	3091|3553|3569|5743|5970|6774|7040	HIF1A|IL1B|IL6|PTGS2|RELA|STAT3|TGFB1	-5.9	MyList
GO Biological Processes	19	GO:0019730	antimicrobial humoral response	19_GO:0044419 biological process involved in interspecies interaction between organisms	-7.2	10	9.1	30284	174	172	10	5.8	1.8	1511|1991|2147|3627|3958|4316|6352|6361|6367|6387	CTSG|ELANE|F2|CXCL10|LGALS3|MMP7|CCL5|CCL17|CCL22|CXCL12	-5.9	MyList
GO Biological Processes	19	GO:0061061	muscle structure development	19_GO:0032502 developmental process	-7.2	5.3	7.6	30284	529	172	16	9.3	2.2	207|596|836|857|1000|1432|1499|2255|2263|2353|2475|3479|3627|7040|7046|7422	AKT1|BCL2|CASP3|CAV1|CDH2|MAPK14|CTNNB1|FGF10|FGFR2|FOS|MTOR|IGF1|CXCL10|TGFB1|TGFBR1|VEGFA	-5.9	MyList
GO Biological Processes	19	GO:0001655	urogenital system development	19_GO:0032502 developmental process	-7.1	20	11	30284	63	172	7	4.1	1.5	367|1499|1588|2099|2255|2263|4313	AR|CTNNB1|CYP19A1|ESR1|FGF10|FGFR2|MMP2	-5.9	MyList
GO Biological Processes	19	GO:0042391	regulation of membrane potential	19_GO:0065007 biological regulation	-7.1	5.7	7.7	30284	463	172	15	8.7	2.2	142|207|213|581|596|857|1906|2475|2932|4137|4233|5728|6647|6648|7124	PARP1|AKT1|ALB|BAX|BCL2|CAV1|EDN1|MTOR|GSK3B|MAPT|MET|PTEN|SOD1|SOD2|TNF	-5.8	MyList
GO Biological Processes	19	GO:0003018	vascular process in circulatory system	19_GO:0032501 multicellular organismal process	-7.1	7.6	8.4	30284	278	172	12	7	1.9	857|875|1906|1956|4313|4846|5743|6647|6648|7040|7124|7422	CAV1|CBS|EDN1|EGFR|MMP2|NOS3|PTGS2|SOD1|SOD2|TGFB1|TNF|VEGFA	-5.8	MyList
GO Biological Processes	19	GO:0055023	positive regulation of cardiac muscle tissue growth	19_GO:0040007 growth	-7.1	28	12	30284	38	172	6	3.5	1.4	1432|1906|2247|2260|2263|3479	MAPK14|EDN1|FGF2|FGFR1|FGFR2|IGF1	-5.8	MyList
GO Biological Processes	19	GO:0070227	lymphocyte apoptotic process	19_GO:0009987 cellular process	-7.1	28	12	30284	38	172	6	3.5	1.4	207|355|581|596|7157|27113	AKT1|FAS|BAX|BCL2|TP53|BBC3	-5.8	MyList
GO Biological Processes	19	GO:0071404	cellular response to low-density lipoprotein particle stimulus	19_GO:0050896 response to stimulus	-7.1	28	12	30284	38	172	6	3.5	1.4	207|5468|6721|6850|7040|7099	AKT1|PPARG|SREBF2|SYK|TGFB1|TLR4	-5.8	MyList
GO Biological Processes	19	GO:0001935	endothelial cell proliferation	19_GO:0009987 cellular process	-7.1	28	12	30284	38	172	6	3.5	1.4	857|2247|2255|4323|7046|7422	CAV1|FGF2|FGF10|MMP14|TGFBR1|VEGFA	-5.8	MyList
GO Biological Processes	19	GO:0055094	response to lipoprotein particle	19_GO:0050896 response to stimulus	-7.1	28	12	30284	38	172	6	3.5	1.4	207|5468|6721|6850|7040|7099	AKT1|PPARG|SREBF2|SYK|TGFB1|TLR4	-5.8	MyList
GO Biological Processes	19	GO:0071392	cellular response to estradiol stimulus	19_GO:0050896 response to stimulus	-7.1	28	12	30284	38	172	6	3.5	1.4	1956|2099|2100|3480|3586|4313	EGFR|ESR1|ESR2|IGF1R|IL10|MMP2	-5.8	MyList
GO Biological Processes	19	GO:0090316	positive regulation of intracellular protein transport	19_GO:0051179 localization	-7.1	15	10	30284	95	172	8	4.7	1.6	1432|2932|3458|3553|5295|5743|7040|26229	MAPK14|GSK3B|IFNG|IL1B|PIK3R1|PTGS2|TGFB1|B3GAT3	-5.8	MyList
GO Biological Processes	19	GO:0010507	negative regulation of autophagy	19_GO:0048519 negative regulation of biological process	-7.1	15	10	30284	95	172	8	4.7	1.6	207|596|2475|3586|4233|5290|6774|7157	AKT1|BCL2|MTOR|IL10|MET|PIK3CA|STAT3|TP53	-5.8	MyList
GO Biological Processes	19	GO:0046824	positive regulation of nucleocytoplasmic transport	19_GO:0051179 localization	-7.1	19	11	30284	64	172	7	4.1	1.5	1432|2932|3458|3553|5295|5743|7040	MAPK14|GSK3B|IFNG|IL1B|PIK3R1|PTGS2|TGFB1	-5.8	MyList
GO Biological Processes	19	GO:0141091	transforming growth factor beta receptor superfamily signaling pathway	19_GO:0050896 response to stimulus	-7.1	9.8	9	30284	179	172	10	5.8	1.8	142|655|2353|3725|5468|6774|7040|7046|7048|7157	PARP1|BMP7|FOS|JUN|PPARG|STAT3|TGFB1|TGFBR1|TGFBR2|TP53	-5.8	MyList
GO Biological Processes	19	GO:0032872	regulation of stress-activated MAPK cascade	19_GO:0050896 response to stimulus	-7.1	27	12	30284	39	172	6	3.5	1.4	355|2308|2950|5594|5604|7099	FAS|FOXO1|GSTP1|MAPK1|MAP2K1|TLR4	-5.8	MyList
GO Biological Processes	19	GO:1990266	neutrophil migration	19_GO:0002376 immune system process	-7.1	19	11	30284	65	172	7	4.1	1.5	3553|3627|3958|5175|5294|6850|54210	IL1B|CXCL10|LGALS3|PECAM1|PIK3CG|SYK|TREM1	-5.8	MyList
GO Biological Processes	19	GO:0090398	cellular senescence	19_GO:0050896 response to stimulus	-7.1	19	11	30284	65	172	7	4.1	1.5	1026|1432|3480|4282|5599|5604|7157	CDKN1A|MAPK14|IGF1R|MIF|MAPK8|MAP2K1|TP53	-5.8	MyList
GO Biological Processes	19	GO:0002821	positive regulation of adaptive immune response	19_GO:0002376 immune system process	-7	12	9.4	30284	136	172	9	5.2	1.7	920|3553|3558|3569|3606|7040|7124|7189|114548	CD4|IL1B|IL2|IL6|IL18|TGFB1|TNF|TRAF6|NLRP3	-5.8	MyList
GO Biological Processes	19	GO:0051153	regulation of striated muscle cell differentiation	19_GO:0032502 developmental process	-7	14	10	30284	98	172	8	4.7	1.6	596|627|1432|1906|2475|3479|4323|7040	BCL2|BDNF|MAPK14|EDN1|MTOR|IGF1|MMP14|TGFB1	-5.7	MyList
GO Biological Processes	19	GO:0043502	regulation of muscle adaptation	19_GO:0032501 multicellular organismal process	-7	14	10	30284	98	172	8	4.7	1.6	142|1906|2308|2309|3479|4846|5468|5578	PARP1|EDN1|FOXO1|FOXO3|IGF1|NOS3|PPARG|PRKCA	-5.7	MyList
GO Biological Processes	19	GO:0071248	cellular response to metal ion	19_GO:0050896 response to stimulus	-7	9.7	8.9	30284	182	172	10	5.8	1.8	142|673|1385|1906|2167|2353|3726|3727|4780|5743	PARP1|BRAF|CREB1|EDN1|FABP4|FOS|JUNB|JUND|NFE2L2|PTGS2	-5.7	MyList
GO Biological Processes	19	GO:1901224	positive regulation of non-canonical NF-kappaB signal transduction	19_GO:0048518 positive regulation of biological process	-7	19	11	30284	66	172	7	4.1	1.5	1906|3553|3606|5970|7099|7124|114548	EDN1|IL1B|IL18|RELA|TLR4|TNF|NLRP3	-5.7	MyList
GO Biological Processes	19	GO:0002067	glandular epithelial cell differentiation	19_GO:0032502 developmental process	-7	19	11	30284	66	172	7	4.1	1.5	857|1000|1499|2247|2263|3091|5241	CAV1|CDH2|CTNNB1|FGF2|FGFR2|HIF1A|PGR	-5.7	MyList
GO Biological Processes	19	GO:0032885	regulation of polysaccharide biosynthetic process	19_GO:0050789 regulation of biological process	-7	26	12	30284	40	172	6	3.5	1.4	207|1950|2932|3479|4790|7040	AKT1|EGF|GSK3B|IGF1|NFKB1|TGFB1	-5.7	MyList
GO Biological Processes	19	GO:0050848	regulation of calcium-mediated signaling	19_GO:0050896 response to stimulus	-7	14	10	30284	99	172	8	4.7	1.6	920|1906|2475|2932|3479|4137|6850|7124	CD4|EDN1|MTOR|GSK3B|IGF1|MAPT|SYK|TNF	-5.7	MyList
GO Biological Processes	19	GO:0051781	positive regulation of cell division	19_GO:0048518 positive regulation of biological process	-7	14	10	30284	99	172	8	4.7	1.6	847|2247|2263|3480|3553|5228|7040|7422	CAT|FGF2|FGFR2|IGF1R|IL1B|PGF|TGFB1|VEGFA	-5.7	MyList
GO Biological Processes	19	GO:0043086	negative regulation of catalytic activity	19_GO:0065007 biological regulation	-7	6.6	7.9	30284	346	172	13	7.6	2	207|1026|2932|2950|3553|4318|4790|5728|5894|7076|7077|7157|7422	AKT1|CDKN1A|GSK3B|GSTP1|IL1B|MMP9|NFKB1|PTEN|RAF1|TIMP1|TIMP2|TP53|VEGFA	-5.7	MyList
GO Biological Processes	19	GO:2000273	positive regulation of signaling receptor activity	19_GO:0050896 response to stimulus	-7	42	14	30284	21	172	5	2.9	1.3	1906|3091|3458|3586|6868	EDN1|HIF1A|IFNG|IL10|ADAM17	-5.7	MyList
GO Biological Processes	19	GO:0002902	regulation of B cell apoptotic process	19_GO:0050789 regulation of biological process	-7	42	14	30284	21	172	5	2.9	1.3	581|596|3558|3586|4282	BAX|BCL2|IL2|IL10|MIF	-5.7	MyList
GO Biological Processes	19	GO:0050768	negative regulation of neurogenesis	19_GO:0032502 developmental process	-7	11	9.3	30284	139	172	9	5.2	1.7	655|1499|2147|3553|3569|5728|7040|7124|7157	BMP7|CTNNB1|F2|IL1B|IL6|PTEN|TGFB1|TNF|TP53	-5.7	MyList
GO Biological Processes	19	GO:0001776	leukocyte homeostasis	19_GO:0042592 homeostatic process	-7	14	9.9	30284	100	172	8	4.7	1.6	207|355|581|596|836|3091|3569|7040	AKT1|FAS|BAX|BCL2|CASP3|HIF1A|IL6|TGFB1	-5.7	MyList
GO Biological Processes	19	GO:0070302	regulation of stress-activated protein kinase signaling cascade	19_GO:0050896 response to stimulus	-6.9	26	12	30284	41	172	6	3.5	1.4	355|2308|2950|5594|5604|7099	FAS|FOXO1|GSTP1|MAPK1|MAP2K1|TLR4	-5.7	MyList
GO Biological Processes	19	GO:0090199	regulation of release of cytochrome c from mitochondria	19_GO:0050896 response to stimulus	-6.9	26	12	30284	41	172	6	3.5	1.4	207|581|3479|4318|7157|27113	AKT1|BAX|IGF1|MMP9|TP53|BBC3	-5.7	MyList
GO Biological Processes	19	GO:0007595	lactation	19_GO:0051179 localization	-6.9	26	12	30284	41	172	6	3.5	1.4	595|857|1385|3091|7422|7498	CCND1|CAV1|CREB1|HIF1A|VEGFA|XDH	-5.7	MyList
GO Biological Processes	19	GO:0120162	positive regulation of cold-induced thermogenesis	19_GO:0042592 homeostatic process	-6.9	14	9.8	30284	101	172	8	4.7	1.6	857|2167|3480|3606|3934|6850|7067|7422	CAV1|FABP4|IGF1R|IL18|LCN2|SYK|THRA|VEGFA	-5.7	MyList
GO Biological Processes	19	GO:0055021	regulation of cardiac muscle tissue growth	19_GO:0040007 growth	-6.9	18	11	30284	68	172	7	4.1	1.5	1432|1906|2247|2260|2263|3479|7046	MAPK14|EDN1|FGF2|FGFR1|FGFR2|IGF1|TGFBR1	-5.6	MyList
GO Biological Processes	19	GO:0060760	positive regulation of response to cytokine stimulus	19_GO:0048518 positive regulation of biological process	-6.9	18	11	30284	68	172	7	4.1	1.5	834|1906|3091|4317|4321|6868|7099	CASP1|EDN1|HIF1A|MMP8|MMP12|ADAM17|TLR4	-5.6	MyList
GO Biological Processes	19	GO:0038129	ERBB3 signaling pathway	19_GO:0050896 response to stimulus	-6.9	78	18	30284	9	172	4	2.3	1.1	2064|5594|5604|5894	ERBB2|MAPK1|MAP2K1|RAF1	-5.6	MyList
GO Biological Processes	19	GO:0002676	regulation of chronic inflammatory response	19_GO:0050896 response to stimulus	-6.9	78	18	30284	9	172	4	2.3	1.1	1588|3586|6352|7124	CYP19A1|IL10|CCL5|TNF	-5.6	MyList
GO Biological Processes	19	GO:0034224	cellular response to zinc ion starvation	19_GO:0050896 response to stimulus	-6.9	78	18	30284	9	172	4	2.3	1.1	1513|2353|3480|6667	CTSK|FOS|IGF1R|SP1	-5.6	MyList
GO Biological Processes	19	GO:0120127	response to zinc ion starvation	19_GO:0050896 response to stimulus	-6.9	78	18	30284	9	172	4	2.3	1.1	1513|2353|3480|6667	CTSK|FOS|IGF1R|SP1	-5.6	MyList
GO Biological Processes	19	GO:0038133	ERBB2-ERBB3 signaling pathway	19_GO:0050896 response to stimulus	-6.9	78	18	30284	9	172	4	2.3	1.1	2064|5594|5604|5894	ERBB2|MAPK1|MAP2K1|RAF1	-5.6	MyList
GO Biological Processes	19	GO:0051099	positive regulation of binding	19_GO:0065007 biological regulation	-6.9	14	9.8	30284	102	172	8	4.7	1.6	627|1950|2932|3458|3479|4233|4318|7189	BDNF|EGF|GSK3B|IFNG|IGF1|MET|MMP9|TRAF6	-5.6	MyList
GO Biological Processes	19	GO:0043369	CD4-positive or CD8-positive, alpha-beta T cell lineage commitment	19_GO:0002376 immune system process	-6.9	40	14	30284	22	172	5	2.9	1.3	596|673|2475|3569|6774	BCL2|BRAF|MTOR|IL6|STAT3	-5.6	MyList
GO Biological Processes	19	GO:0010623	programmed cell death involved in cell development	19_GO:0032502 developmental process	-6.9	40	14	30284	22	172	5	2.9	1.3	581|596|3553|3815|6647	BAX|BCL2|IL1B|KIT|SOD1	-5.6	MyList
GO Biological Processes	19	GO:1902004	positive regulation of amyloid-beta formation	19_GO:0048518 positive regulation of biological process	-6.9	40	14	30284	22	172	5	2.9	1.3	836|3458|5970|6667|7124	CASP3|IFNG|RELA|SP1|TNF	-5.6	MyList
GO Biological Processes	19	GO:0060421	positive regulation of heart growth	19_GO:0040007 growth	-6.9	25	12	30284	42	172	6	3.5	1.4	1432|1906|2247|2260|2263|3479	MAPK14|EDN1|FGF2|FGFR1|FGFR2|IGF1	-5.6	MyList
GO Biological Processes	19	GO:0070232	regulation of T cell apoptotic process	19_GO:0050789 regulation of biological process	-6.9	25	12	30284	42	172	6	3.5	1.4	596|3091|3958|6352|7157|27113	BCL2|HIF1A|LGALS3|CCL5|TP53|BBC3	-5.6	MyList
GO Biological Processes	19	GO:0060251	regulation of glial cell proliferation	19_GO:0032502 developmental process	-6.9	25	12	30284	42	172	6	3.5	1.4	1956|3553|3569|7124|7157|407006	EGFR|IL1B|IL6|TNF|TP53|MIR221	-5.6	MyList
GO Biological Processes	19	GO:0014044	Schwann cell development	19_GO:0032502 developmental process	-6.9	25	12	30284	42	172	6	3.5	1.4	207|2064|5594|5604|5894|6647	AKT1|ERBB2|MAPK1|MAP2K1|RAF1|SOD1	-5.6	MyList
GO Biological Processes	19	GO:0007179	transforming growth factor beta receptor signaling pathway	19_GO:0050896 response to stimulus	-6.9	14	9.7	30284	103	172	8	4.7	1.6	142|2353|3725|6774|7040|7046|7048|7157	PARP1|FOS|JUN|STAT3|TGFB1|TGFBR1|TGFBR2|TP53	-5.6	MyList
GO Biological Processes	19	GO:0035148	tube formation	19_GO:0032502 developmental process	-6.9	11	9.1	30284	143	172	9	5.2	1.7	655|836|1499|2255|2263|3091|7040|7189|7422	BMP7|CASP3|CTNNB1|FGF10|FGFR2|HIF1A|TGFB1|TRAF6|VEGFA	-5.6	MyList
GO Biological Processes	19	GO:0023061	signal release	19_GO:0051179 localization	-6.8	9.3	8.6	30284	190	172	10	5.8	1.8	673|1385|1906|3091|3569|4843|5743|5894|6850|6868	BRAF|CREB1|EDN1|HIF1A|IL6|NOS2|PTGS2|RAF1|SYK|ADAM17	-5.6	MyList
GO Biological Processes	19	GO:0048662	negative regulation of smooth muscle cell proliferation	19_GO:0048519 negative regulation of biological process	-6.8	18	11	30284	70	172	7	4.1	1.5	1026|3458|3586|4846|5468|5728|6648	CDKN1A|IFNG|IL10|NOS3|PPARG|PTEN|SOD2	-5.6	MyList
GO Biological Processes	19	GO:0010803	regulation of tumor necrosis factor-mediated signaling pathway	19_GO:0050896 response to stimulus	-6.8	18	11	30284	70	172	7	4.1	1.5	834|841|2950|3551|4317|6850|6868	CASP1|CASP8|GSTP1|IKBKB|MMP8|SYK|ADAM17	-5.6	MyList
GO Biological Processes	19	GO:2000045	regulation of G1/S transition of mitotic cell cycle	19_GO:0050789 regulation of biological process	-6.8	9.2	8.6	30284	191	172	10	5.8	1.8	207|595|596|1026|1956|2255|5728|6868|7157|407006	AKT1|CCND1|BCL2|CDKN1A|EGFR|FGF10|PTEN|ADAM17|TP53|MIR221	-5.5	MyList
GO Biological Processes	19	GO:0007249	canonical NF-kappaB signal transduction	19_GO:0050896 response to stimulus	-6.8	25	12	30284	43	172	6	3.5	1.4	3551|4790|4792|5970|7099|7189	IKBKB|NFKB1|NFKBIA|RELA|TLR4|TRAF6	-5.5	MyList
GO Biological Processes	19	GO:0043255	regulation of carbohydrate biosynthetic process	19_GO:0050789 regulation of biological process	-6.8	13	9.6	30284	105	172	8	4.7	1.6	207|1950|2308|2908|2932|3479|4790|7040	AKT1|EGF|FOXO1|NR3C1|GSK3B|IGF1|NFKB1|TGFB1	-5.5	MyList
GO Biological Processes	19	GO:0002753	cytoplasmic pattern recognition receptor signaling pathway	19_GO:0044419 biological process involved in interspecies interaction between organisms	-6.8	17	10	30284	71	172	7	4.1	1.5	3551|4792|5970|7099|7124|7189|114548	IKBKB|NFKBIA|RELA|TLR4|TNF|TRAF6|NLRP3	-5.5	MyList
GO Biological Processes	19	GO:0048562	embryonic organ morphogenesis	19_GO:0032502 developmental process	-6.8	7	7.9	30284	300	172	12	7	1.9	655|1499|1906|2255|2260|2263|3091|4323|5594|6647|7046|7048	BMP7|CTNNB1|EDN1|FGF10|FGFR1|FGFR2|HIF1A|MMP14|MAPK1|SOD1|TGFBR1|TGFBR2	-5.5	MyList
GO Biological Processes	19	GO:0050999	regulation of nitric-oxide synthase activity	19_GO:0065007 biological regulation	-6.8	38	14	30284	23	172	5	2.9	1.3	207|2099|3091|3553|4883	AKT1|ESR1|HIF1A|IL1B|NPR3	-5.5	MyList
GO Biological Processes	19	GO:0060740	prostate gland epithelium morphogenesis	19_GO:0022414 reproductive process	-6.8	38	14	30284	23	172	5	2.9	1.3	367|2099|2255|2263|4313	AR|ESR1|FGF10|FGFR2|MMP2	-5.5	MyList
GO Biological Processes	19	GO:0070498	interleukin-1-mediated signaling pathway	19_GO:0050896 response to stimulus	-6.8	38	14	30284	23	172	5	2.9	1.3	3551|3553|4792|5970|7189	IKBKB|IL1B|NFKBIA|RELA|TRAF6	-5.5	MyList
GO Biological Processes	19	GO:1905477	positive regulation of protein localization to membrane	19_GO:0051179 localization	-6.8	13	9.6	30284	106	172	8	4.7	1.6	207|1956|2064|3458|3958|5290|5295|7124	AKT1|EGFR|ERBB2|IFNG|LGALS3|PIK3CA|PIK3R1|TNF	-5.5	MyList
GO Biological Processes	19	GO:0051961	negative regulation of nervous system development	19_GO:0032502 developmental process	-6.8	11	9	30284	147	172	9	5.2	1.7	655|1499|2147|3553|3569|5728|7040|7124|7157	BMP7|CTNNB1|F2|IL1B|IL6|PTEN|TGFB1|TNF|TP53	-5.5	MyList
GO Biological Processes	19	GO:0032940	secretion by cell	19_GO:0051179 localization	-6.7	5.8	7.5	30284	428	172	14	8.1	2.1	673|1385|1906|2255|3091|3569|3815|4843|5294|5743|5894|6352|6850|6868	BRAF|CREB1|EDN1|FGF10|HIF1A|IL6|KIT|NOS2|PIK3CG|PTGS2|RAF1|CCL5|SYK|ADAM17	-5.5	MyList
GO Biological Processes	19	GO:0021543	pallium development	19_GO:0032502 developmental process	-6.7	9.1	8.5	30284	194	172	10	5.8	1.8	581|836|1000|1499|1956|2353|2932|3091|3480|5728	BAX|CASP3|CDH2|CTNNB1|EGFR|FOS|GSK3B|HIF1A|IGF1R|PTEN	-5.5	MyList
GO Biological Processes	19	GO:0060559	positive regulation of calcidiol 1-monooxygenase activity	19_GO:0065007 biological regulation	-6.7	180	23	30284	3	172	3	1.7	1	3458|3553|7124	IFNG|IL1B|TNF	-5.5	MyList
GO Biological Processes	19	GO:0032735	positive regulation of interleukin-12 production	19_GO:0032501 multicellular organismal process	-6.7	24	12	30284	44	172	6	3.5	1.4	1432|3458|5970|6850|7099|7189	MAPK14|IFNG|RELA|SYK|TLR4|TRAF6	-5.5	MyList
GO Biological Processes	19	GO:0031295	T cell costimulation	19_GO:0002376 immune system process	-6.7	24	12	30284	44	172	6	3.5	1.4	207|857|1803|2475|5290|5781	AKT1|CAV1|DPP4|MTOR|PIK3CA|PTPN11	-5.5	MyList
GO Biological Processes	19	GO:0048812	neuron projection morphogenesis	19_GO:0032502 developmental process	-6.7	5.3	7.3	30284	498	172	15	8.7	2.2	596|627|655|1385|1499|1906|1956|2064|2263|3480|5728|5781|6387|6868|7422	BCL2|BDNF|BMP7|CREB1|CTNNB1|EDN1|EGFR|ERBB2|FGFR2|IGF1R|PTEN|PTPN11|CXCL12|ADAM17|VEGFA	-5.5	MyList
GO Biological Processes	19	GO:1901222	regulation of non-canonical NF-kappaB signal transduction	19_GO:0050896 response to stimulus	-6.7	13	9.5	30284	107	172	8	4.7	1.6	655|1906|3553|3606|5970|7099|7124|114548	BMP7|EDN1|IL1B|IL18|RELA|TLR4|TNF|NLRP3	-5.5	MyList
GO Biological Processes	19	GO:0061351	neural precursor cell proliferation	19_GO:0009987 cellular process	-6.7	13	9.5	30284	107	172	8	4.7	1.6	1499|1950|2247|2260|2263|3091|7157|7422	CTNNB1|EGF|FGF2|FGFR1|FGFR2|HIF1A|TP53|VEGFA	-5.5	MyList
GO Biological Processes	19	GO:0043393	regulation of protein binding	19_GO:0065007 biological regulation	-6.7	13	9.5	30284	108	172	8	4.7	1.6	207|581|627|1026|2932|3586|4318|5599	AKT1|BAX|BDNF|CDKN1A|GSK3B|IL10|MMP9|MAPK8	-5.4	MyList
GO Biological Processes	19	GO:0001570	vasculogenesis	19_GO:0032502 developmental process	-6.7	17	10	30284	73	172	7	4.1	1.5	857|1499|3685|3726|7040|7048|7422	CAV1|CTNNB1|ITGAV|JUNB|TGFB1|TGFBR2|VEGFA	-5.4	MyList
GO Biological Processes	19	GO:0001542	ovulation from ovarian follicle	19_GO:0048511 rhythmic process	-6.7	70	17	30284	10	172	4	2.3	1.1	2309|4313|4846|5241	FOXO3|MMP2|NOS3|PGR	-5.4	MyList
GO Biological Processes	19	GO:0070942	neutrophil mediated cytotoxicity	19_GO:0002376 immune system process	-6.7	70	17	30284	10	172	4	2.3	1.1	1511|1991|2147|54210	CTSG|ELANE|F2|TREM1	-5.4	MyList
GO Biological Processes	19	GO:0070944	neutrophil-mediated killing of bacterium	19_GO:0044419 biological process involved in interspecies interaction between organisms	-6.7	70	17	30284	10	172	4	2.3	1.1	1511|1991|2147|54210	CTSG|ELANE|F2|TREM1	-5.4	MyList
GO Biological Processes	19	GO:0070943	neutrophil-mediated killing of symbiont cell	19_GO:0044419 biological process involved in interspecies interaction between organisms	-6.7	70	17	30284	10	172	4	2.3	1.1	1511|1991|2147|54210	CTSG|ELANE|F2|TREM1	-5.4	MyList
GO Biological Processes	19	GO:0043029	T cell homeostasis	19_GO:0042592 homeostatic process	-6.7	23	11	30284	45	172	6	3.5	1.4	207|355|581|596|836|7040	AKT1|FAS|BAX|BCL2|CASP3|TGFB1	-5.4	MyList
GO Biological Processes	19	GO:0031294	lymphocyte costimulation	19_GO:0002376 immune system process	-6.7	23	11	30284	45	172	6	3.5	1.4	207|857|1803|2475|5290|5781	AKT1|CAV1|DPP4|MTOR|PIK3CA|PTPN11	-5.4	MyList
GO Biological Processes	19	GO:1902692	regulation of neuroblast proliferation	19_GO:0032502 developmental process	-6.7	23	11	30284	45	172	6	3.5	1.4	1499|2247|3091|7040|7157|7422	CTNNB1|FGF2|HIF1A|TGFB1|TP53|VEGFA	-5.4	MyList
GO Biological Processes	19	GO:1904019	epithelial cell apoptotic process	19_GO:0009987 cellular process	-6.7	23	11	30284	45	172	6	3.5	1.4	581|596|836|1788|5294|7048	BAX|BCL2|CASP3|DNMT3A|PIK3CG|TGFBR2	-5.4	MyList
GO Biological Processes	19	GO:0120039	plasma membrane bounded cell projection morphogenesis	19_GO:0032502 developmental process	-6.7	5.3	7.3	30284	503	172	15	8.7	2.2	596|627|655|1385|1499|1906|1956|2064|2263|3480|5728|5781|6387|6868|7422	BCL2|BDNF|BMP7|CREB1|CTNNB1|EDN1|EGFR|ERBB2|FGFR2|IGF1R|PTEN|PTPN11|CXCL12|ADAM17|VEGFA	-5.4	MyList
GO Biological Processes	19	GO:0034114	regulation of heterotypic cell-cell adhesion	19_GO:0050789 regulation of biological process	-6.7	37	13	30284	24	172	5	2.9	1.3	655|3553|3586|7124|407006	BMP7|IL1B|IL10|TNF|MIR221	-5.4	MyList
GO Biological Processes	19	GO:0051403	stress-activated MAPK cascade	19_GO:0050896 response to stimulus	-6.7	37	13	30284	24	172	5	2.9	1.3	1432|3551|5594|5599|7099	MAPK14|IKBKB|MAPK1|MAPK8|TLR4	-5.4	MyList
GO Biological Processes	19	GO:0060252	positive regulation of glial cell proliferation	19_GO:0032502 developmental process	-6.7	37	13	30284	24	172	5	2.9	1.3	1956|3553|3569|7124|407006	EGFR|IL1B|IL6|TNF|MIR221	-5.4	MyList
GO Biological Processes	19	GO:0001836	release of cytochrome c from mitochondria	19_GO:0050896 response to stimulus	-6.7	37	13	30284	24	172	5	2.9	1.3	581|596|6648|7157|27113	BAX|BCL2|SOD2|TP53|BBC3	-5.4	MyList
GO Biological Processes	19	GO:0060420	regulation of heart growth	19_GO:0040007 growth	-6.7	17	10	30284	74	172	7	4.1	1.5	1432|1906|2247|2260|2263|3479|7046	MAPK14|EDN1|FGF2|FGFR1|FGFR2|IGF1|TGFBR1	-5.4	MyList
GO Biological Processes	19	GO:0046425	regulation of receptor signaling pathway via JAK-STAT	19_GO:0050896 response to stimulus	-6.7	17	10	30284	74	172	7	4.1	1.5	857|1950|2147|3569|3586|3815|407006	CAV1|EGF|F2|IL6|IL10|KIT|MIR221	-5.4	MyList
GO Biological Processes	19	GO:0002260	lymphocyte homeostasis	19_GO:0042592 homeostatic process	-6.7	17	10	30284	74	172	7	4.1	1.5	207|355|581|596|836|3091|7040	AKT1|FAS|BAX|BCL2|CASP3|HIF1A|TGFB1	-5.4	MyList
GO Biological Processes	19	GO:0007409	axonogenesis	19_GO:0032502 developmental process	-6.7	6.2	7.6	30284	370	172	13	7.6	2	596|627|655|1385|1906|2064|2263|3480|5728|5781|6387|6868|7422	BCL2|BDNF|BMP7|CREB1|EDN1|ERBB2|FGFR2|IGF1R|PTEN|PTPN11|CXCL12|ADAM17|VEGFA	-5.4	MyList
GO Biological Processes	19	GO:0002250	adaptive immune response	19_GO:0002376 immune system process	-6.6	4.6	7	30284	655	172	17	9.9	2.3	715|716|920|1520|2475|3458|3558|3569|3606|5294|6774|6850|6868|7040|7099|7189|54210	C1R|C1S|CD4|CTSS|MTOR|IFNG|IL2|IL6|IL18|PIK3CG|STAT3|SYK|ADAM17|TGFB1|TLR4|TRAF6|TREM1	-5.4	MyList
GO Biological Processes	19	GO:0033157	regulation of intracellular protein transport	19_GO:0051179 localization	-6.6	10	8.8	30284	152	172	9	5.2	1.7	1432|2932|3458|3553|5295|5743|5781|7040|26229	MAPK14|GSK3B|IFNG|IL1B|PIK3R1|PTGS2|PTPN11|TGFB1|B3GAT3	-5.4	MyList
GO Biological Processes	19	GO:0002706	regulation of lymphocyte mediated immunity	19_GO:0002376 immune system process	-6.6	8.8	8.4	30284	200	172	10	5.8	1.8	196|3553|3558|3569|3586|3606|7040|7124|7189|114548	AHR|IL1B|IL2|IL6|IL10|IL18|TGFB1|TNF|TRAF6|NLRP3	-5.4	MyList
GO Biological Processes	19	GO:0045646	regulation of erythrocyte differentiation	19_GO:0042592 homeostatic process	-6.6	23	11	30284	46	172	6	3.5	1.4	1432|2309|3091|6772|6774|407006	MAPK14|FOXO3|HIF1A|STAT1|STAT3|MIR221	-5.4	MyList
GO Biological Processes	19	GO:2001239	regulation of extrinsic apoptotic signaling pathway in absence of ligand	19_GO:0050896 response to stimulus	-6.6	23	11	30284	46	172	6	3.5	1.4	207|596|2255|2260|3553|7124	AKT1|BCL2|FGF10|FGFR1|IL1B|TNF	-5.4	MyList
GO Biological Processes	19	GO:0045601	regulation of endothelial cell differentiation	19_GO:0032502 developmental process	-6.6	23	11	30284	46	172	6	3.5	1.4	1499|3551|3553|7124|7422|7498	CTNNB1|IKBKB|IL1B|TNF|VEGFA|XDH	-5.4	MyList
GO Biological Processes	19	GO:0051881	regulation of mitochondrial membrane potential	19_GO:0065007 biological regulation	-6.6	16	10	30284	75	172	7	4.1	1.5	142|213|581|596|4137|6647|6648	PARP1|ALB|BAX|BCL2|MAPT|SOD1|SOD2	-5.4	MyList
GO Biological Processes	19	GO:0048858	cell projection morphogenesis	19_GO:0032502 developmental process	-6.6	5.2	7.2	30284	510	172	15	8.7	2.2	596|627|655|1385|1499|1906|1956|2064|2263|3480|5728|5781|6387|6868|7422	BCL2|BDNF|BMP7|CREB1|CTNNB1|EDN1|EGFR|ERBB2|FGFR2|IGF1R|PTEN|PTPN11|CXCL12|ADAM17|VEGFA	-5.4	MyList
GO Biological Processes	19	GO:0055080	monoatomic cation homeostasis	19_GO:0042592 homeostatic process	-6.6	5.2	7.2	30284	512	172	15	8.7	2.2	581|596|760|857|1906|1991|2147|2260|3091|5594|6352|6387|6647|6648|7040	BAX|BCL2|CA2|CAV1|EDN1|ELANE|F2|FGFR1|HIF1A|MAPK1|CCL5|CXCL12|SOD1|SOD2|TGFB1	-5.3	MyList
GO Biological Processes	19	GO:0098771	inorganic ion homeostasis	19_GO:0042592 homeostatic process	-6.6	5.6	7.3	30284	442	172	14	8.1	2.1	581|596|857|1906|1991|2147|2260|3091|5009|6352|6387|6647|6648|7040	BAX|BCL2|CAV1|EDN1|ELANE|F2|FGFR1|HIF1A|OTC|CCL5|CXCL12|SOD1|SOD2|TGFB1	-5.3	MyList
GO Biological Processes	19	GO:0002548	monocyte chemotaxis	19_GO:0040011 locomotion	-6.6	35	13	30284	25	172	5	2.9	1.3	1511|2321|3569|3958|6352	CTSG|FLT1|IL6|LGALS3|CCL5	-5.3	MyList
GO Biological Processes	19	GO:0060512	prostate gland morphogenesis	19_GO:0022414 reproductive process	-6.6	35	13	30284	25	172	5	2.9	1.3	367|2099|2255|2263|4313	AR|ESR1|FGF10|FGFR2|MMP2	-5.3	MyList
GO Biological Processes	19	GO:0002224	toll-like receptor signaling pathway	19_GO:0044419 biological process involved in interspecies interaction between organisms	-6.6	22	11	30284	47	172	6	3.5	1.4	1520|3551|5970|7099|7189|8061	CTSS|IKBKB|RELA|TLR4|TRAF6|FOSL1	-5.3	MyList
GO Biological Processes	19	GO:0014037	Schwann cell differentiation	19_GO:0032502 developmental process	-6.6	22	11	30284	47	172	6	3.5	1.4	207|2064|5594|5604|5894|6647	AKT1|ERBB2|MAPK1|MAP2K1|RAF1|SOD1	-5.3	MyList
GO Biological Processes	19	GO:0002695	negative regulation of leukocyte activation	19_GO:0002376 immune system process	-6.5	8.6	8.3	30284	204	172	10	5.8	1.8	836|1511|2064|3558|3586|3958|5320|5781|7040|10062	CASP3|CTSG|ERBB2|IL2|IL10|LGALS3|PLA2G2A|PTPN11|TGFB1|NR1H3	-5.3	MyList
GO Biological Processes	19	GO:0032371	regulation of sterol transport	19_GO:0051179 localization	-6.5	16	10	30284	77	172	7	4.1	1.5	857|1950|4790|4792|5468|6721|10062	CAV1|EGF|NFKB1|NFKBIA|PPARG|SREBF2|NR1H3	-5.3	MyList
GO Biological Processes	19	GO:0045669	positive regulation of osteoblast differentiation	19_GO:0032502 developmental process	-6.5	16	10	30284	77	172	7	4.1	1.5	655|1499|2247|3479|3569|3727|7422	BMP7|CTNNB1|FGF2|IGF1|IL6|JUND|VEGFA	-5.3	MyList
GO Biological Processes	19	GO:0032374	regulation of cholesterol transport	19_GO:0051179 localization	-6.5	16	10	30284	77	172	7	4.1	1.5	857|1950|4790|4792|5468|6721|10062	CAV1|EGF|NFKB1|NFKBIA|PPARG|SREBF2|NR1H3	-5.3	MyList
GO Biological Processes	19	GO:0042445	hormone metabolic process	19_GO:0065007 biological regulation	-6.5	8.6	8.2	30284	205	172	10	5.8	1.8	1508|1511|1513|1559|1588|1645|1646|1803|2099|5781	CTSB|CTSG|CTSK|CYP2C9|CYP19A1|AKR1C1|AKR1C2|DPP4|ESR1|PTPN11	-5.3	MyList
GO Biological Processes	19	GO:0050804	modulation of chemical synaptic transmission	19_GO:0050789 regulation of biological process	-6.5	5.1	7.1	30284	518	172	15	8.7	2.2	627|673|760|1906|1956|2932|3156|3553|3815|4137|5327|5594|5728|5743|7124	BDNF|BRAF|CA2|EDN1|EGFR|GSK3B|HMGCR|IL1B|KIT|MAPT|PLAT|MAPK1|PTEN|PTGS2|TNF	-5.3	MyList
GO Biological Processes	19	GO:0032881	regulation of polysaccharide metabolic process	19_GO:0050789 regulation of biological process	-6.5	22	11	30284	48	172	6	3.5	1.4	207|1950|2932|3479|4790|7040	AKT1|EGF|GSK3B|IGF1|NFKB1|TGFB1	-5.3	MyList
GO Biological Processes	19	GO:0099177	regulation of trans-synaptic signaling	19_GO:0050789 regulation of biological process	-6.5	5.1	7.1	30284	519	172	15	8.7	2.2	627|673|760|1906|1956|2932|3156|3553|3815|4137|5327|5594|5728|5743|7124	BDNF|BRAF|CA2|EDN1|EGFR|GSK3B|HMGCR|IL1B|KIT|MAPT|PLAT|MAPK1|PTEN|PTGS2|TNF	-5.3	MyList
GO Biological Processes	19	GO:0002637	regulation of immunoglobulin production	19_GO:0002376 immune system process	-6.5	16	9.9	30284	78	172	7	4.1	1.5	2821|3558|3569|3586|7040|7124|7189	GPI|IL2|IL6|IL10|TGFB1|TNF|TRAF6	-5.3	MyList
GO Biological Processes	19	GO:0048667	cell morphogenesis involved in neuron differentiation	19_GO:0032502 developmental process	-6.5	5.5	7.2	30284	449	172	14	8.1	2.1	596|627|655|1385|1906|2064|2263|3480|5728|5781|6387|6647|6868|7422	BCL2|BDNF|BMP7|CREB1|EDN1|ERBB2|FGFR2|IGF1R|PTEN|PTPN11|CXCL12|SOD1|ADAM17|VEGFA	-5.3	MyList
GO Biological Processes	19	GO:0060020	Bergmann glial cell differentiation	19_GO:0032502 developmental process	-6.5	64	16	30284	11	172	4	2.3	1.1	5594|5604|5781|7431	MAPK1|MAP2K1|PTPN11|VIM	-5.3	MyList
GO Biological Processes	19	GO:0060736	prostate gland growth	19_GO:0040007 growth	-6.5	64	16	30284	11	172	4	2.3	1.1	367|1588|2099|2263	AR|CYP19A1|ESR1|FGFR2	-5.3	MyList
GO Biological Processes	19	GO:0060439	trachea morphogenesis	19_GO:0032502 developmental process	-6.5	64	16	30284	11	172	4	2.3	1.1	1499|5594|5604|7048	CTNNB1|MAPK1|MAP2K1|TGFBR2	-5.3	MyList
GO Biological Processes	19	GO:0031666	positive regulation of lipopolysaccharide-mediated signaling pathway	19_GO:0044419 biological process involved in interspecies interaction between organisms	-6.5	64	16	30284	11	172	4	2.3	1.1	4282|5578|5781|7189	MIF|PRKCA|PTPN11|TRAF6	-5.3	MyList
GO Biological Processes	19	GO:0006909	phagocytosis	19_GO:0051179 localization	-6.5	10	8.6	30284	159	172	9	5.2	1.7	1991|3458|3685|4843|5175|5290|6850|7099|10062	ELANE|IFNG|ITGAV|NOS2|PECAM1|PIK3CA|SYK|TLR4|NR1H3	-5.2	MyList
GO Biological Processes	19	GO:0033628	regulation of cell adhesion mediated by integrin	19_GO:0050789 regulation of biological process	-6.5	22	11	30284	49	172	6	3.5	1.4	1803|5294|5328|5781|6352|6850	DPP4|PIK3CG|PLAU|PTPN11|CCL5|SYK	-5.2	MyList
GO Biological Processes	19	GO:0070849	response to epidermal growth factor	19_GO:0050896 response to stimulus	-6.5	22	11	30284	49	172	6	3.5	1.4	207|1956|2064|2353|5594|5781	AKT1|EGFR|ERBB2|FOS|MAPK1|PTPN11	-5.2	MyList
GO Biological Processes	19	GO:0048546	digestive tract morphogenesis	19_GO:0032502 developmental process	-6.5	22	11	30284	49	172	6	3.5	1.4	596|1499|1956|2255|2263|3091	BCL2|CTNNB1|EGFR|FGF10|FGFR2|HIF1A	-5.2	MyList
GO Biological Processes	19	GO:0032660	regulation of interleukin-17 production	19_GO:0032501 multicellular organismal process	-6.5	22	11	30284	49	172	6	3.5	1.4	3458|3558|3569|3606|7040|7099	IFNG|IL2|IL6|IL18|TGFB1|TLR4	-5.2	MyList
GO Biological Processes	19	GO:0060425	lung morphogenesis	19_GO:0032502 developmental process	-6.5	22	11	30284	49	172	6	3.5	1.4	1499|2255|2263|5594|5604|7048	CTNNB1|FGF10|FGFR2|MAPK1|MAP2K1|TGFBR2	-5.2	MyList
GO Biological Processes	19	GO:1902003	regulation of amyloid-beta formation	19_GO:0050789 regulation of biological process	-6.5	22	11	30284	49	172	6	3.5	1.4	836|3458|3479|5970|6667|7124	CASP3|IFNG|IGF1|RELA|SP1|TNF	-5.2	MyList
GO Biological Processes	19	GO:0006606	protein import into nucleus	19_GO:0051179 localization	-6.4	12	9	30284	117	172	8	4.7	1.6	207|1026|4321|4792|5295|6774|6850|7157	AKT1|CDKN1A|MMP12|NFKBIA|PIK3R1|STAT3|SYK|TP53	-5.2	MyList
GO Biological Processes	19	GO:0018105	peptidyl-serine phosphorylation	19_GO:0009987 cellular process	-6.4	15	9.8	30284	80	172	7	4.1	1.5	207|1432|2932|3551|5594|5599|7046	AKT1|MAPK14|GSK3B|IKBKB|MAPK1|MAPK8|TGFBR1	-5.2	MyList
GO Biological Processes	19	GO:0098773	skin epidermis development	19_GO:0032502 developmental process	-6.4	12	9	30284	118	172	8	4.7	1.6	596|1499|1956|2255|2263|3606|4233|5970	BCL2|CTNNB1|EGFR|FGF10|FGFR2|IL18|MET|RELA	-5.2	MyList
GO Biological Processes	19	GO:0050819	negative regulation of coagulation	19_GO:0048519 negative regulation of biological process	-6.4	21	11	30284	50	172	6	3.5	1.4	308|1906|2147|4846|5327|5328	ANXA5|EDN1|F2|NOS3|PLAT|PLAU	-5.2	MyList
GO Biological Processes	19	GO:0051150	regulation of smooth muscle cell differentiation	19_GO:0032502 developmental process	-6.4	21	11	30284	50	172	6	3.5	1.4	1786|2263|3815|6648|7040|407006	DNMT1|FGFR2|KIT|SOD2|TGFB1|MIR221	-5.2	MyList
GO Biological Processes	19	GO:0022602	ovulation cycle process	19_GO:0048511 rhythmic process	-6.4	21	11	30284	50	172	6	3.5	1.4	836|2099|2309|4313|4846|5241	CASP3|ESR1|FOXO3|MMP2|NOS3|PGR	-5.2	MyList
GO Biological Processes	19	GO:0010463	mesenchymal cell proliferation	19_GO:0009987 cellular process	-6.4	33	12	30284	27	172	5	2.9	1.3	655|1499|2260|2263|6772	BMP7|CTNNB1|FGFR1|FGFR2|STAT1	-5.2	MyList
GO Biological Processes	19	GO:1905564	positive regulation of vascular endothelial cell proliferation	19_GO:0048518 positive regulation of biological process	-6.4	33	12	30284	27	172	5	2.9	1.3	2247|2260|6667|6774|6868	FGF2|FGFR1|SP1|STAT3|ADAM17	-5.2	MyList
GO Biological Processes	19	GO:0031098	stress-activated protein kinase signaling cascade	19_GO:0050896 response to stimulus	-6.4	33	12	30284	27	172	5	2.9	1.3	1432|3551|5594|5599|7099	MAPK14|IKBKB|MAPK1|MAPK8|TLR4	-5.2	MyList
GO Biological Processes	19	GO:0002053	positive regulation of mesenchymal cell proliferation	19_GO:0048518 positive regulation of biological process	-6.4	33	12	30284	27	172	5	2.9	1.3	1499|2260|2263|6772|7048	CTNNB1|FGFR1|FGFR2|STAT1|TGFBR2	-5.2	MyList
GO Biological Processes	19	GO:0035902	response to immobilization stress	19_GO:0050896 response to stimulus	-6.4	33	12	30284	27	172	5	2.9	1.3	2309|2353|2821|6648|7040	FOXO3|FOS|GPI|SOD2|TGFB1	-5.2	MyList
GO Biological Processes	19	GO:0046637	regulation of alpha-beta T cell differentiation	19_GO:0002376 immune system process	-6.4	15	9.7	30284	81	172	7	4.1	1.5	3458|3558|3606|3726|6850|7048|114548	IFNG|IL2|IL18|JUNB|SYK|TGFBR2|NLRP3	-5.2	MyList
GO Biological Processes	19	GO:0046822	regulation of nucleocytoplasmic transport	19_GO:0051179 localization	-6.4	12	9	30284	119	172	8	4.7	1.6	1432|2932|3458|3553|5295|5743|5781|7040	MAPK14|GSK3B|IFNG|IL1B|PIK3R1|PTGS2|PTPN11|TGFB1	-5.2	MyList
GO Biological Processes	19	GO:0001678	intracellular glucose homeostasis	19_GO:0042592 homeostatic process	-6.4	12	9	30284	119	172	8	4.7	1.6	2308|2309|3091|3480|5290|5295|5894|7040	FOXO1|FOXO3|HIF1A|IGF1R|PIK3CA|PIK3R1|RAF1|TGFB1	-5.2	MyList
GO Biological Processes	19	GO:0046632	alpha-beta T cell differentiation	19_GO:0002376 immune system process	-6.3	15	9.6	30284	82	172	7	4.1	1.5	596|673|2475|3569|5295|6774|6850	BCL2|BRAF|MTOR|IL6|PIK3R1|STAT3|SYK	-5.1	MyList
GO Biological Processes	19	GO:2000142	regulation of DNA-templated transcription initiation	19_GO:0050789 regulation of biological process	-6.3	15	9.6	30284	82	172	7	4.1	1.5	2308|3725|4790|4792|7067|7157|8061	FOXO1|JUN|NFKB1|NFKBIA|THRA|TP53|FOSL1	-5.1	MyList
GO Biological Processes	19	GO:1990090	cellular response to nerve growth factor stimulus	19_GO:0050896 response to stimulus	-6.3	21	11	30284	51	172	6	3.5	1.4	142|207|627|673|2309|4137	PARP1|AKT1|BDNF|BRAF|FOXO3|MAPT	-5.1	MyList
GO Biological Processes	19	GO:0097194	execution phase of apoptosis	19_GO:0009987 cellular process	-6.3	21	11	30284	51	172	6	3.5	1.4	207|581|836|841|1509|27113	AKT1|BAX|CASP3|CASP8|CTSD|BBC3	-5.1	MyList
GO Biological Processes	19	GO:2000343	positive regulation of chemokine (C-X-C motif) ligand 2 production	19_GO:0032501 multicellular organismal process	-6.3	59	15	30284	12	172	4	2.3	1.1	4282|7040|7099|7124	MIF|TGFB1|TLR4|TNF	-5.1	MyList
GO Biological Processes	19	GO:1902993	positive regulation of amyloid precursor protein catabolic process	19_GO:0048518 positive regulation of biological process	-6.3	31	12	30284	28	172	5	2.9	1.3	836|3458|5970|6667|7124	CASP3|IFNG|RELA|SP1|TNF	-5.1	MyList
GO Biological Processes	19	GO:0002070	epithelial cell maturation	19_GO:0032502 developmental process	-6.3	31	12	30284	28	172	5	2.9	1.3	1026|3091|5241|7040|7422	CDKN1A|HIF1A|PGR|TGFB1|VEGFA	-5.1	MyList
GO Biological Processes	19	GO:0002675	positive regulation of acute inflammatory response	19_GO:0048518 positive regulation of biological process	-6.3	31	12	30284	28	172	5	2.9	1.3	3553|3569|5294|5743|7124	IL1B|IL6|PIK3CG|PTGS2|TNF	-5.1	MyList
GO Biological Processes	19	GO:0002726	positive regulation of T cell cytokine production	19_GO:0002376 immune system process	-6.3	31	12	30284	28	172	5	2.9	1.3	3553|3569|3606|7189|114548	IL1B|IL6|IL18|TRAF6|NLRP3	-5.1	MyList
GO Biological Processes	19	GO:0042311	vasodilation	19_GO:0032501 multicellular organismal process	-6.3	20	11	30284	52	172	6	3.5	1.4	1956|4846|6647|6648|7124|7422	EGFR|NOS3|SOD1|SOD2|TNF|VEGFA	-5.1	MyList
GO Biological Processes	19	GO:0009299	mRNA transcription	19_GO:0009987 cellular process	-6.3	20	11	30284	52	172	6	3.5	1.4	1385|5468|6774|7067|7157|10062	CREB1|PPARG|STAT3|THRA|TP53|NR1H3	-5.1	MyList
GO Biological Processes	19	GO:0051170	import into nucleus	19_GO:0051179 localization	-6.3	12	8.8	30284	122	172	8	4.7	1.6	207|1026|4321|4792|5295|6774|6850|7157	AKT1|CDKN1A|MMP12|NFKBIA|PIK3R1|STAT3|SYK|TP53	-5.1	MyList
GO Biological Processes	19	GO:0045582	positive regulation of T cell differentiation	19_GO:0002376 immune system process	-6.3	12	8.8	30284	122	172	8	4.7	1.6	2309|3458|3558|3606|6850|7040|7048|114548	FOXO3|IFNG|IL2|IL18|SYK|TGFB1|TGFBR2|NLRP3	-5.1	MyList
GO Biological Processes	19	GO:0032386	regulation of intracellular transport	19_GO:0051179 localization	-6.3	7.1	7.6	30284	273	172	11	6.4	1.9	1432|2932|3458|3553|5295|5594|5604|5743|5781|7040|26229	MAPK14|GSK3B|IFNG|IL1B|PIK3R1|MAPK1|MAP2K1|PTGS2|PTPN11|TGFB1|B3GAT3	-5.1	MyList
GO Biological Processes	19	GO:0046394	carboxylic acid biosynthetic process	19_GO:0009987 cellular process	-6.3	7.1	7.6	30284	274	172	11	6.4	1.9	240|834|875|1559|1906|2950|4282|5009|5742|5743|6850	ALOX5|CASP1|CBS|CYP2C9|EDN1|GSTP1|MIF|OTC|PTGS1|PTGS2|SYK	-5.1	MyList
GO Biological Processes	19	GO:0046634	regulation of alpha-beta T cell activation	19_GO:0002376 immune system process	-6.3	11	8.8	30284	123	172	8	4.7	1.6	3458|3558|3606|3726|3958|6850|7048|114548	IFNG|IL2|IL18|JUNB|LGALS3|SYK|TGFBR2|NLRP3	-5.1	MyList
GO Biological Processes	19	GO:1990089	response to nerve growth factor	19_GO:0050896 response to stimulus	-6.2	20	10	30284	53	172	6	3.5	1.4	142|207|627|673|2309|4137	PARP1|AKT1|BDNF|BRAF|FOXO3|MAPT	-5	MyList
GO Biological Processes	19	GO:0150076	neuroinflammatory response	19_GO:0050896 response to stimulus	-6.2	20	10	30284	53	172	6	3.5	1.4	1956|2908|3458|3553|4137|7124	EGFR|NR3C1|IFNG|IL1B|MAPT|TNF	-5	MyList
GO Biological Processes	19	GO:0051604	protein maturation	19_GO:0009987 cellular process	-6.2	4.9	6.9	30284	544	172	15	8.7	2.2	142|715|834|836|841|1511|1520|1803|3309|3551|4323|5327|5328|6868|114548	PARP1|C1R|CASP1|CASP3|CASP8|CTSG|CTSS|DPP4|HSPA5|IKBKB|MMP14|PLAT|PLAU|ADAM17|NLRP3	-5	MyList
GO Biological Processes	19	GO:1902806	regulation of cell cycle G1/S phase transition	19_GO:0050789 regulation of biological process	-6.2	8	7.9	30284	220	172	10	5.8	1.8	207|595|596|1026|1956|2255|5728|6868|7157|407006	AKT1|CCND1|BCL2|CDKN1A|EGFR|FGF10|PTEN|ADAM17|TP53|MIR221	-5	MyList
GO Biological Processes	19	GO:0051702	biological process involved in interaction with symbiont	19_GO:0044419 biological process involved in interspecies interaction between organisms	-6.2	11	8.7	30284	124	172	8	4.7	1.6	1511|1991|2147|3725|6352|6667|54210|407006	CTSG|ELANE|F2|JUN|CCL5|SP1|TREM1|MIR221	-5	MyList
GO Biological Processes	19	GO:0042476	odontogenesis	19_GO:0032502 developmental process	-6.2	11	8.7	30284	124	172	8	4.7	1.6	581|655|1499|2255|2260|2263|7040|7189	BAX|BMP7|CTNNB1|FGF10|FGFR1|FGFR2|TGFB1|TRAF6	-5	MyList
GO Biological Processes	19	GO:0016053	organic acid biosynthetic process	19_GO:0009987 cellular process	-6.2	7	7.6	30284	277	172	11	6.4	1.9	240|834|875|1559|1906|2950|4282|5009|5742|5743|6850	ALOX5|CASP1|CBS|CYP2C9|EDN1|GSTP1|MIF|OTC|PTGS1|PTGS2|SYK	-5	MyList
GO Biological Processes	19	GO:0030163	protein catabolic process	19_GO:0009987 cellular process	-6.2	4	6.5	30284	786	172	18	10	2.3	207|836|841|1499|1508|1509|1513|1520|1991|2191|2932|3309|4313|4314|4321|4323|4780|5970	AKT1|CASP3|CASP8|CTNNB1|CTSB|CTSD|CTSK|CTSS|ELANE|FAP|GSK3B|HSPA5|MMP2|MMP3|MMP12|MMP14|NFE2L2|RELA	-5	MyList
GO Biological Processes	19	GO:0021761	limbic system development	19_GO:0032502 developmental process	-6.2	11	8.7	30284	125	172	8	4.7	1.6	581|836|1499|2260|2263|2932|3480|5728	BAX|CASP3|CTNNB1|FGFR1|FGFR2|GSK3B|IGF1R|PTEN	-5	MyList
GO Biological Processes	19	GO:0001952	regulation of cell-matrix adhesion	19_GO:0050789 regulation of biological process	-6.2	11	8.7	30284	125	172	8	4.7	1.6	596|2932|4321|4323|5295|5328|5728|7422	BCL2|GSK3B|MMP12|MMP14|PIK3R1|PLAU|PTEN|VEGFA	-5	MyList
GO Biological Processes	19	GO:0010874	regulation of cholesterol efflux	19_GO:0051179 localization	-6.2	20	10	30284	54	172	6	3.5	1.4	857|1950|4792|5468|6721|10062	CAV1|EGF|NFKBIA|PPARG|SREBF2|NR1H3	-5	MyList
GO Biological Processes	19	GO:0048286	lung alveolus development	19_GO:0032502 developmental process	-6.2	20	10	30284	54	172	6	3.5	1.4	1385|2255|2263|4321|5241|7040	CREB1|FGF10|FGFR2|MMP12|PGR|TGFB1	-5	MyList
GO Biological Processes	19	GO:0030593	neutrophil chemotaxis	19_GO:0040011 locomotion	-6.2	20	10	30284	54	172	6	3.5	1.4	3553|3627|3958|5294|6850|54210	IL1B|CXCL10|LGALS3|PIK3CG|SYK|TREM1	-5	MyList
GO Biological Processes	19	GO:0021537	telencephalon development	19_GO:0032502 developmental process	-6.2	6.9	7.5	30284	280	172	11	6.4	1.9	581|836|1000|1499|1956|2353|2932|3091|3480|5728|6387	BAX|CASP3|CDH2|CTNNB1|EGFR|FOS|GSK3B|HIF1A|IGF1R|PTEN|CXCL12	-5	MyList
GO Biological Processes	19	GO:0046661	male sex differentiation	19_GO:0022414 reproductive process	-6.2	9.2	8.2	30284	172	172	9	5.2	1.7	367|581|596|1499|2099|2255|3815|4323|7046	AR|BAX|BCL2|CTNNB1|ESR1|FGF10|KIT|MMP14|TGFBR1	-5	MyList
GO Biological Processes	19	GO:0003205	cardiac chamber development	19_GO:0032502 developmental process	-6.2	9.2	8.2	30284	172	172	9	5.2	1.7	655|2263|3091|3480|4846|7040|7046|7048|7157	BMP7|FGFR2|HIF1A|IGF1R|NOS3|TGFB1|TGFBR1|TGFBR2|TP53	-5	MyList
GO Biological Processes	19	GO:0045737	positive regulation of cyclin-dependent protein serine/threonine kinase activity	19_GO:0048518 positive regulation of biological process	-6.2	54	14	30284	13	172	4	2.3	1.1	207|595|1956|6868	AKT1|CCND1|EGFR|ADAM17	-5	MyList
GO Biological Processes	19	GO:0060333	type II interferon-mediated signaling pathway	19_GO:0044419 biological process involved in interspecies interaction between organisms	-6.2	54	14	30284	13	172	4	2.3	1.1	3458|5894|6772|7157	IFNG|RAF1|STAT1|TP53	-5	MyList
GO Biological Processes	19	GO:2000108	positive regulation of leukocyte apoptotic process	19_GO:0048518 positive regulation of biological process	-6.1	29	12	30284	30	172	5	2.9	1.3	581|3586|6352|7157|27113	BAX|IL10|CCL5|TP53|BBC3	-4.9	MyList
GO Biological Processes	19	GO:0010893	positive regulation of steroid biosynthetic process	19_GO:0048518 positive regulation of biological process	-6.1	29	12	30284	30	172	5	2.9	1.3	3458|3480|5594|6721|7124	IFNG|IGF1R|MAPK1|SREBF2|TNF	-4.9	MyList
GO Biological Processes	19	GO:0045672	positive regulation of osteoclast differentiation	19_GO:0002376 immune system process	-6.1	29	12	30284	30	172	5	2.9	1.3	1385|2353|3458|7124|7189	CREB1|FOS|IFNG|TNF|TRAF6	-4.9	MyList
GO Biological Processes	19	GO:1900017	positive regulation of cytokine production involved in inflammatory response	19_GO:0032501 multicellular organismal process	-6.1	29	12	30284	30	172	5	2.9	1.3	3091|3569|6774|7099|7124	HIF1A|IL6|STAT3|TLR4|TNF	-4.9	MyList
GO Biological Processes	19	GO:0009896	positive regulation of catabolic process	19_GO:0048518 positive regulation of biological process	-6.1	4.5	6.6	30284	631	172	16	9.3	2.2	207|581|857|1950|2308|2309|2475|2932|3091|3458|3479|3553|3569|4780|5728|7124	AKT1|BAX|CAV1|EGF|FOXO1|FOXO3|MTOR|GSK3B|HIF1A|IFNG|IGF1|IL1B|IL6|NFE2L2|PTEN|TNF	-4.9	MyList
GO Biological Processes	19	GO:2000697	negative regulation of epithelial cell differentiation involved in kidney development	19_GO:0032502 developmental process	-6.1	130	20	30284	4	172	3	1.7	1	1499|4318|6772	CTNNB1|MMP9|STAT1	-4.9	MyList
GO Biological Processes	19	GO:0043588	skin development	19_GO:0032502 developmental process	-6.1	6.8	7.5	30284	283	172	11	6.4	1.9	596|836|1026|1499|1956|2255|2263|3606|4233|5604|5970	BCL2|CASP3|CDKN1A|CTNNB1|EGFR|FGF10|FGFR2|IL18|MET|MAP2K1|RELA	-4.9	MyList
GO Biological Processes	19	GO:0051235	maintenance of location	19_GO:0051179 localization	-6.1	9.1	8.1	30284	174	172	9	5.2	1.7	207|857|920|3309|3553|3586|4792|5241|7124	AKT1|CAV1|CD4|HSPA5|IL1B|IL10|NFKBIA|PGR|TNF	-4.9	MyList
GO Biological Processes	19	GO:1903828	negative regulation of protein localization	19_GO:0051179 localization	-6.1	7.8	7.7	30284	226	172	10	5.8	1.8	207|2308|2475|2932|3156|3553|4137|5781|7040|10062	AKT1|FOXO1|MTOR|GSK3B|HMGCR|IL1B|MAPT|PTPN11|TGFB1|NR1H3	-4.9	MyList
GO Biological Processes	19	GO:0030278	regulation of ossification	19_GO:0032501 multicellular organismal process	-6.1	11	8.6	30284	128	172	8	4.7	1.6	240|596|655|1432|3091|5594|5781|7040	ALOX5|BCL2|BMP7|MAPK14|HIF1A|MAPK1|PTPN11|TGFB1	-4.9	MyList
GO Biological Processes	19	GO:0072175	epithelial tube formation	19_GO:0032502 developmental process	-6.1	11	8.6	30284	128	172	8	4.7	1.6	655|836|1499|2255|2263|3091|7040|7189	BMP7|CASP3|CTNNB1|FGF10|FGFR2|HIF1A|TGFB1|TRAF6	-4.9	MyList
GO Biological Processes	19	GO:0016055	Wnt signaling pathway	19_GO:0050896 response to stimulus	-6.1	6.8	7.4	30284	284	172	11	6.4	1.9	595|857|1499|1906|2247|2255|2308|2309|2932|5728|7040	CCND1|CAV1|CTNNB1|EDN1|FGF2|FGF10|FOXO1|FOXO3|GSK3B|PTEN|TGFB1	-4.9	MyList
GO Biological Processes	19	GO:0051048	negative regulation of secretion	19_GO:0051179 localization	-6.1	9.1	8.1	30284	175	172	9	5.2	1.7	673|1906|1950|2308|3156|3553|5781|7124|10062	BRAF|EDN1|EGF|FOXO1|HMGCR|IL1B|PTPN11|TNF|NR1H3	-4.9	MyList
GO Biological Processes	19	GO:0003206	cardiac chamber morphogenesis	19_GO:0032502 developmental process	-6.1	11	8.5	30284	129	172	8	4.7	1.6	655|2263|3091|4846|7040|7046|7048|7157	BMP7|FGFR2|HIF1A|NOS3|TGFB1|TGFBR1|TGFBR2|TP53	-4.9	MyList
GO Biological Processes	19	GO:0009791	post-embryonic development	19_GO:0032502 developmental process	-6.1	14	9.2	30284	89	172	7	4.1	1.5	581|596|2263|2475|6648|7046|7422	BAX|BCL2|FGFR2|MTOR|SOD2|TGFBR1|VEGFA	-4.9	MyList
GO Biological Processes	19	GO:2000648	positive regulation of stem cell proliferation	19_GO:0048518 positive regulation of biological process	-6.1	19	10	30284	56	172	6	3.5	1.4	1499|2247|2255|2260|7040|7046	CTNNB1|FGF2|FGF10|FGFR1|TGFB1|TGFBR1	-4.9	MyList
GO Biological Processes	19	GO:1900087	positive regulation of G1/S transition of mitotic cell cycle	19_GO:0048518 positive regulation of biological process	-6.1	19	10	30284	56	172	6	3.5	1.4	207|595|1956|2255|6868|407006	AKT1|CCND1|EGFR|FGF10|ADAM17|MIR221	-4.9	MyList
GO Biological Processes	19	GO:0043583	ear development	19_GO:0032502 developmental process	-6.1	7.7	7.7	30284	229	172	10	5.8	1.8	596|1906|2247|2255|2260|2263|5594|5781|6647|7040	BCL2|EDN1|FGF2|FGF10|FGFR1|FGFR2|MAPK1|PTPN11|SOD1|TGFB1	-4.9	MyList
GO Biological Processes	19	GO:0042552	myelination	19_GO:0032502 developmental process	-6.1	11	8.5	30284	130	172	8	4.7	1.6	207|2064|5594|5604|5728|5894|6647|7040	AKT1|ERBB2|MAPK1|MAP2K1|PTEN|RAF1|SOD1|TGFB1	-4.9	MyList
GO Biological Processes	19	GO:0060674	placenta blood vessel development	19_GO:0032502 developmental process	-6.1	28	12	30284	31	172	5	2.9	1.3	207|3726|5594|5604|8061	AKT1|JUNB|MAPK1|MAP2K1|FOSL1	-4.9	MyList
GO Biological Processes	19	GO:0033688	regulation of osteoblast proliferation	19_GO:0050789 regulation of biological process	-6.1	28	12	30284	31	172	5	2.9	1.3	596|2263|3480|3685|4883	BCL2|FGFR2|IGF1R|ITGAV|NPR3	-4.9	MyList
GO Biological Processes	19	GO:0097193	intrinsic apoptotic signaling pathway	19_GO:0050896 response to stimulus	-6.1	9	8	30284	177	172	9	5.2	1.7	581|596|836|1026|5295|6648|7124|7157|27113	BAX|BCL2|CASP3|CDKN1A|PIK3R1|SOD2|TNF|TP53|BBC3	-4.9	MyList
GO Biological Processes	19	GO:0071385	cellular response to glucocorticoid stimulus	19_GO:0050896 response to stimulus	-6.1	19	10	30284	57	172	6	3.5	1.4	1906|1956|2309|2908|3480|7040	EDN1|EGFR|FOXO3|NR3C1|IGF1R|TGFB1	-4.9	MyList
GO Biological Processes	19	GO:1902991	regulation of amyloid precursor protein catabolic process	19_GO:0050789 regulation of biological process	-6.1	19	10	30284	57	172	6	3.5	1.4	836|3458|3479|5970|6667|7124	CASP3|IFNG|IGF1|RELA|SP1|TNF	-4.9	MyList
GO Biological Processes	19	GO:0050853	B cell receptor signaling pathway	19_GO:0002376 immune system process	-6.1	19	10	30284	57	172	6	3.5	1.4	581|596|4790|4792|5594|6850	BAX|BCL2|NFKB1|NFKBIA|MAPK1|SYK	-4.9	MyList
GO Biological Processes	19	GO:0048678	response to axon injury	19_GO:0050896 response to stimulus	-6.1	19	10	30284	57	172	6	3.5	1.4	581|596|2247|4313|6647|6648	BAX|BCL2|FGF2|MMP2|SOD1|SOD2	-4.9	MyList
GO Biological Processes	19	GO:0050830	defense response to Gram-positive bacterium	19_GO:0044419 biological process involved in interspecies interaction between organisms	-6.1	11	8.5	30284	131	172	8	4.7	1.6	1511|3553|3569|3606|4316|5320|6868|7124	CTSG|IL1B|IL6|IL18|MMP7|PLA2G2A|ADAM17|TNF	-4.9	MyList
GO Biological Processes	19	GO:0051591	response to cAMP	19_GO:0050896 response to stimulus	-6	14	9.1	30284	91	172	7	4.1	1.5	196|673|2353|5294|5970|6772|8061	AHR|BRAF|FOS|PIK3CG|RELA|STAT1|FOSL1	-4.8	MyList
GO Biological Processes	19	GO:0008361	regulation of cell size	19_GO:0065007 biological regulation	-6	8.9	8	30284	179	172	9	5.2	1.7	627|1385|1906|2475|2932|4137|5728|6387|7422	BDNF|CREB1|EDN1|MTOR|GSK3B|MAPT|PTEN|CXCL12|VEGFA	-4.8	MyList
GO Biological Processes	19	GO:0055074	calcium ion homeostasis	19_GO:0042592 homeostatic process	-6	7.6	7.6	30284	232	172	10	5.8	1.8	581|596|857|1906|1991|2147|2260|6352|6387|7040	BAX|BCL2|CAV1|EDN1|ELANE|F2|FGFR1|CCL5|CXCL12|TGFB1	-4.8	MyList
GO Biological Processes	19	GO:0007272	ensheathment of neurons	19_GO:0032502 developmental process	-6	11	8.4	30284	132	172	8	4.7	1.6	207|2064|5594|5604|5728|5894|6647|7040	AKT1|ERBB2|MAPK1|MAP2K1|PTEN|RAF1|SOD1|TGFB1	-4.8	MyList
GO Biological Processes	19	GO:0008366	axon ensheathment	19_GO:0032502 developmental process	-6	11	8.4	30284	132	172	8	4.7	1.6	207|2064|5594|5604|5728|5894|6647|7040	AKT1|ERBB2|MAPK1|MAP2K1|PTEN|RAF1|SOD1|TGFB1	-4.8	MyList
GO Biological Processes	19	GO:0051547	regulation of keratinocyte migration	19_GO:0040011 locomotion	-6	50	14	30284	14	172	4	2.3	1.1	2255|2475|4318|5728	FGF10|MTOR|MMP9|PTEN	-4.8	MyList
GO Biological Processes	19	GO:0030728	ovulation	19_GO:0022414 reproductive process	-6	50	14	30284	14	172	4	2.3	1.1	2309|4313|4846|5241	FOXO3|MMP2|NOS3|PGR	-4.8	MyList
GO Biological Processes	19	GO:0034116	positive regulation of heterotypic cell-cell adhesion	19_GO:0048518 positive regulation of biological process	-6	50	14	30284	14	172	4	2.3	1.1	655|3553|3586|7124	BMP7|IL1B|IL10|TNF	-4.8	MyList
GO Biological Processes	19	GO:1903377	negative regulation of oxidative stress-induced neuron intrinsic apoptotic signaling pathway	19_GO:0048519 negative regulation of biological process	-6	50	14	30284	14	172	4	2.3	1.1	1499|2247|3091|3586	CTNNB1|FGF2|HIF1A|IL10	-4.8	MyList
GO Biological Processes	19	GO:1904031	positive regulation of cyclin-dependent protein kinase activity	19_GO:0048518 positive regulation of biological process	-6	50	14	30284	14	172	4	2.3	1.1	207|595|1956|6868	AKT1|CCND1|EGFR|ADAM17	-4.8	MyList
GO Biological Processes	19	GO:0051000	positive regulation of nitric-oxide synthase activity	19_GO:0065007 biological regulation	-6	50	14	30284	14	172	4	2.3	1.1	207|2099|3091|4883	AKT1|ESR1|HIF1A|NPR3	-4.8	MyList
GO Biological Processes	19	GO:0010745	negative regulation of macrophage derived foam cell differentiation	19_GO:0032502 developmental process	-6	50	14	30284	14	172	4	2.3	1.1	3685|4792|5468|10062	ITGAV|NFKBIA|PPARG|NR1H3	-4.8	MyList
GO Biological Processes	19	GO:0018209	peptidyl-serine modification	19_GO:0009987 cellular process	-6	13	9	30284	92	172	7	4.1	1.5	207|1432|2932|3551|5594|5599|7046	AKT1|MAPK14|GSK3B|IKBKB|MAPK1|MAPK8|TGFBR1	-4.8	MyList
GO Biological Processes	19	GO:0002708	positive regulation of lymphocyte mediated immunity	19_GO:0002376 immune system process	-6	11	8.4	30284	133	172	8	4.7	1.6	3553|3558|3569|3606|7040|7124|7189|114548	IL1B|IL2|IL6|IL18|TGFB1|TNF|TRAF6|NLRP3	-4.8	MyList
GO Biological Processes	19	GO:0140352	export from cell	19_GO:0051179 localization	-6	5	6.7	30284	495	172	14	8.1	2.1	673|1385|1906|2255|3091|3569|3815|4843|5294|5743|5894|6352|6850|6868	BRAF|CREB1|EDN1|FGF10|HIF1A|IL6|KIT|NOS2|PIK3CG|PTGS2|RAF1|CCL5|SYK|ADAM17	-4.8	MyList
GO Biological Processes	19	GO:2000107	negative regulation of leukocyte apoptotic process	19_GO:0048519 negative regulation of biological process	-6	18	9.8	30284	59	172	6	3.5	1.4	596|3091|3558|4282|6352|6387	BCL2|HIF1A|IL2|MIF|CCL5|CXCL12	-4.8	MyList
GO Biological Processes	19	GO:0034976	response to endoplasmic reticulum stress	19_GO:0050896 response to stimulus	-6	7.5	7.5	30284	236	172	10	5.8	1.8	581|595|596|2932|3309|3725|4780|5295|7157|27113	BAX|CCND1|BCL2|GSK3B|HSPA5|JUN|NFE2L2|PIK3R1|TP53|BBC3	-4.8	MyList
GO Biological Processes	19	GO:0014910	regulation of smooth muscle cell migration	19_GO:0040011 locomotion	-5.9	13	8.9	30284	94	172	7	4.1	1.5	596|3479|4780|5328|6352|7099|407006	BCL2|IGF1|NFE2L2|PLAU|CCL5|TLR4|MIR221	-4.8	MyList
GO Biological Processes	19	GO:0070269	pyroptotic inflammatory response	19_GO:0050896 response to stimulus	-5.9	27	11	30284	33	172	5	2.9	1.3	834|836|841|1991|114548	CASP1|CASP3|CASP8|ELANE|NLRP3	-4.8	MyList
GO Biological Processes	19	GO:0006984	ER-nucleus signaling pathway	19_GO:0050896 response to stimulus	-5.9	27	11	30284	33	172	5	2.9	1.3	2932|3309|4780|6721|7157	GSK3B|HSPA5|NFE2L2|SREBF2|TP53	-4.8	MyList
GO Biological Processes	19	GO:0050868	negative regulation of T cell activation	19_GO:0002376 immune system process	-5.9	10	8.3	30284	136	172	8	4.7	1.6	836|1511|2064|3558|3586|3958|5320|7040	CASP3|CTSG|ERBB2|IL2|IL10|LGALS3|PLA2G2A|TGFB1	-4.8	MyList
GO Biological Processes	19	GO:0000079	regulation of cyclin-dependent protein serine/threonine kinase activity	19_GO:0050789 regulation of biological process	-5.9	18	9.7	30284	60	172	6	3.5	1.4	207|595|1026|1956|5728|6868	AKT1|CCND1|CDKN1A|EGFR|PTEN|ADAM17	-4.7	MyList
GO Biological Processes	19	GO:0030518	nuclear receptor-mediated steroid hormone signaling pathway	19_GO:0050896 response to stimulus	-5.9	18	9.7	30284	60	172	6	3.5	1.4	367|2099|2100|2908|5241|5594	AR|ESR1|ESR2|NR3C1|PGR|MAPK1	-4.7	MyList
GO Biological Processes	19	GO:0045185	maintenance of protein location	19_GO:0051179 localization	-5.9	13	8.8	30284	95	172	7	4.1	1.5	207|857|920|3309|3586|4792|5241	AKT1|CAV1|CD4|HSPA5|IL10|NFKBIA|PGR	-4.7	MyList
GO Biological Processes	19	GO:0045930	negative regulation of mitotic cell cycle	19_GO:0048519 negative regulation of biological process	-5.9	7.3	7.4	30284	240	172	10	5.8	1.8	595|596|655|1026|1499|1956|3586|5728|7124|7157	CCND1|BCL2|BMP7|CDKN1A|CTNNB1|EGFR|IL10|PTEN|TNF|TP53	-4.7	MyList
GO Biological Processes	19	GO:0030003	intracellular monoatomic cation homeostasis	19_GO:0042592 homeostatic process	-5.9	5.3	6.8	30284	433	172	13	7.6	2	581|596|760|857|1906|1991|2147|3091|5594|6352|6387|6647|7040	BAX|BCL2|CA2|CAV1|EDN1|ELANE|F2|HIF1A|MAPK1|CCL5|CXCL12|SOD1|TGFB1	-4.7	MyList
GO Biological Processes	19	GO:0050930	induction of positive chemotaxis	19_GO:0040011 locomotion	-5.9	47	13	30284	15	172	4	2.3	1.1	2255|5228|6387|7422	FGF10|PGF|CXCL12|VEGFA	-4.7	MyList
GO Biological Processes	19	GO:0051412	response to corticosterone	19_GO:0050896 response to stimulus	-5.9	47	13	30284	15	172	4	2.3	1.1	1026|2309|2353|8061	CDKN1A|FOXO3|FOS|FOSL1	-4.7	MyList
GO Biological Processes	19	GO:2001028	positive regulation of endothelial cell chemotaxis	19_GO:0040011 locomotion	-5.9	47	13	30284	15	172	4	2.3	1.1	2247|2260|4233|7422	FGF2|FGFR1|MET|VEGFA	-4.7	MyList
GO Biological Processes	19	GO:0001961	positive regulation of cytokine-mediated signaling pathway	19_GO:0048518 positive regulation of biological process	-5.9	17	9.6	30284	61	172	6	3.5	1.4	834|1906|3091|4317|4321|6868	CASP1|EDN1|HIF1A|MMP8|MMP12|ADAM17	-4.7	MyList
GO Biological Processes	19	GO:0010464	regulation of mesenchymal cell proliferation	19_GO:0050789 regulation of biological process	-5.9	26	11	30284	34	172	5	2.9	1.3	1499|2260|2263|6772|7048	CTNNB1|FGFR1|FGFR2|STAT1|TGFBR2	-4.7	MyList
GO Biological Processes	19	GO:2000191	regulation of fatty acid transport	19_GO:0051179 localization	-5.9	26	11	30284	34	172	5	2.9	1.3	207|1906|3553|4282|6850	AKT1|EDN1|IL1B|MIF|SYK	-4.7	MyList
GO Biological Processes	19	GO:0009112	nucleobase metabolic process	19_GO:0009987 cellular process	-5.9	26	11	30284	34	172	5	2.9	1.3	1890|2475|5594|7276|7498	TYMP|MTOR|MAPK1|TTR|XDH	-4.7	MyList
GO Biological Processes	19	GO:0033032	regulation of myeloid cell apoptotic process	19_GO:0050789 regulation of biological process	-5.9	26	11	30284	34	172	5	2.9	1.3	596|4282|6352|6868|7067	BCL2|MIF|CCL5|ADAM17|THRA	-4.7	MyList
GO Biological Processes	19	GO:1901889	negative regulation of cell junction assembly	19_GO:0048519 negative regulation of biological process	-5.9	26	11	30284	34	172	5	2.9	1.3	3551|3553|4323|5728|7124	IKBKB|IL1B|MMP14|PTEN|TNF	-4.7	MyList
GO Biological Processes	19	GO:0007623	circadian rhythm	19_GO:0048511 rhythmic process	-5.9	10	8.2	30284	139	172	8	4.7	1.6	196|1385|1956|2932|4843|5728|7124|7157	AHR|CREB1|EGFR|GSK3B|NOS2|PTEN|TNF|TP53	-4.7	MyList
GO Biological Processes	19	GO:0032388	positive regulation of intracellular transport	19_GO:0051179 localization	-5.8	10	8.1	30284	140	172	8	4.7	1.6	1432|2932|3458|3553|5295|5743|7040|26229	MAPK14|GSK3B|IFNG|IL1B|PIK3R1|PTGS2|TGFB1|B3GAT3	-4.7	MyList
GO Biological Processes	19	GO:0045599	negative regulation of fat cell differentiation	19_GO:0032502 developmental process	-5.8	17	9.6	30284	62	172	6	3.5	1.4	2308|3569|6648|7040|7124|7422	FOXO1|IL6|SOD2|TGFB1|TNF|VEGFA	-4.7	MyList
GO Biological Processes	19	GO:1904029	regulation of cyclin-dependent protein kinase activity	19_GO:0050789 regulation of biological process	-5.8	17	9.6	30284	62	172	6	3.5	1.4	207|595|1026|1956|5728|6868	AKT1|CCND1|CDKN1A|EGFR|PTEN|ADAM17	-4.7	MyList
GO Biological Processes	19	GO:1903320	regulation of protein modification by small protein conjugation or removal	19_GO:0050789 regulation of biological process	-5.8	7.2	7.4	30284	244	172	10	5.8	1.8	207|857|1499|2932|3091|3309|5728|5970|7046|7189	AKT1|CAV1|CTNNB1|GSK3B|HIF1A|HSPA5|PTEN|RELA|TGFBR1|TRAF6	-4.7	MyList
GO Biological Processes	19	GO:0042633	hair cycle	19_GO:0032501 multicellular organismal process	-5.8	13	8.7	30284	98	172	7	4.1	1.5	596|1499|1956|2255|2263|5743|5970	BCL2|CTNNB1|EGFR|FGF10|FGFR2|PTGS2|RELA	-4.6	MyList
GO Biological Processes	19	GO:0042303	molting cycle	19_GO:0032501 multicellular organismal process	-5.8	13	8.7	30284	98	172	7	4.1	1.5	596|1499|1956|2255|2263|5743|5970	BCL2|CTNNB1|EGFR|FGF10|FGFR2|PTGS2|RELA	-4.6	MyList
GO Biological Processes	19	GO:0060560	developmental growth involved in morphogenesis	19_GO:0040007 growth	-5.8	10	8.1	30284	141	172	8	4.7	1.6	627|1499|1906|2099|2255|2263|7040|7048	BDNF|CTNNB1|EDN1|ESR1|FGF10|FGFR2|TGFB1|TGFBR2	-4.6	MyList
GO Biological Processes	19	GO:0043368	positive T cell selection	19_GO:0002376 immune system process	-5.8	25	11	30284	35	172	5	2.9	1.3	596|673|2475|3569|6774	BCL2|BRAF|MTOR|IL6|STAT3	-4.6	MyList
GO Biological Processes	19	GO:0001893	maternal placenta development	19_GO:0022414 reproductive process	-5.8	25	11	30284	35	172	5	2.9	1.3	142|207|1508|3726|5743	PARP1|AKT1|CTSB|JUNB|PTGS2	-4.6	MyList
GO Biological Processes	19	GO:0045940	positive regulation of steroid metabolic process	19_GO:0048518 positive regulation of biological process	-5.8	25	11	30284	35	172	5	2.9	1.3	3458|3480|5594|6721|7124	IFNG|IGF1R|MAPK1|SREBF2|TNF	-4.6	MyList
GO Biological Processes	19	GO:0048147	negative regulation of fibroblast proliferation	19_GO:0048519 negative regulation of biological process	-5.8	25	11	30284	35	172	5	2.9	1.3	581|857|2950|6648|7157	BAX|CAV1|GSTP1|SOD2|TP53	-4.6	MyList
GO Biological Processes	19	GO:0062207	regulation of pattern recognition receptor signaling pathway	19_GO:0044419 biological process involved in interspecies interaction between organisms	-5.8	8.3	7.6	30284	191	172	9	5.2	1.7	142|207|857|2099|3551|5295|5599|7099|10062	PARP1|AKT1|CAV1|ESR1|IKBKB|PIK3R1|MAPK8|TLR4|NR1H3	-4.6	MyList
GO Biological Processes	19	GO:0002040	sprouting angiogenesis	19_GO:0032502 developmental process	-5.8	17	9.5	30284	63	172	6	3.5	1.4	207|2247|2321|5228|7040|7422	AKT1|FGF2|FLT1|PGF|TGFB1|VEGFA	-4.6	MyList
GO Biological Processes	19	GO:0043030	regulation of macrophage activation	19_GO:0002376 immune system process	-5.8	17	9.5	30284	63	172	6	3.5	1.4	3569|3586|4282|4317|7099|10062	IL6|IL10|MIF|MMP8|TLR4|NR1H3	-4.6	MyList
GO Biological Processes	19	GO:0006873	intracellular monoatomic ion homeostasis	19_GO:0042592 homeostatic process	-5.8	5.2	6.7	30284	442	172	13	7.6	2	581|596|760|857|1906|1991|2147|3091|5594|6352|6387|6647|7040	BAX|BCL2|CA2|CAV1|EDN1|ELANE|F2|HIF1A|MAPK1|CCL5|CXCL12|SOD1|TGFB1	-4.6	MyList
GO Biological Processes	19	GO:0002460	adaptive immune response based on somatic recombination of immune receptors built from immunoglobulin superfamily domains	19_GO:0002376 immune system process	-5.8	7.1	7.3	30284	248	172	10	5.8	1.8	715|716|2475|3569|3606|6774|6868|7040|7099|7189	C1R|C1S|MTOR|IL6|IL18|STAT3|ADAM17|TGFB1|TLR4|TRAF6	-4.6	MyList
GO Biological Processes	19	GO:0050770	regulation of axonogenesis	19_GO:0032502 developmental process	-5.8	9.9	8	30284	143	172	8	4.7	1.6	627|673|2932|4137|5604|5728|6387|7422	BDNF|BRAF|GSK3B|MAPT|MAP2K1|PTEN|CXCL12|VEGFA	-4.6	MyList
[truncated: 1,151 more rows]

## Sheet: Supplementary Table 5B-Entries 
Table S5B. Entries of GO Molecular Functions
[truncated: 224 more rows]

[truncated: 2 more sheets: Supplementary Table 5C-Entries , Supplementary Table 6  Entries ]
